# Supplementary material
Source: Elsevier journal article supplement (https://www.sciencedirect.com/science/article/pii/S1136103421000708)
Supplement: mmc3 [file S1136103421000708:mmc3.docx]

:eLln'EA=;#QOi)+TPr3?WsT5!!$.-!!!Z4#Qe3tDf0Z.DKK5bH#R>9>qUA=C`oGT
![s]A!WW3#zzzzzzzzzzzzzzzzzzzzzzzzzzzzzzzzzzzzzzzzzzzzzzzzzzzzzz
zzzzzzzzzzzzzzzzzzzzzzzzzzzzzzzzzzzzzzzzzzzzzzzzzzzzzzzzzzzzzzzz
zzzzzzzzz!5t2H:;\as7JB@N6f]h6>Z`,%R^1kV"=2+p(jj\5pa(upmGB]pBS@"7
q>ddW(#/JSlZ!PMF>^P)G__+/]8E/F6WS`$?>2@#f^n0AE5;lT_C8p+K8M5\g"#lm
BJ`ip^k1&G/(UL1/icGTJ/)2_!00N`+0A(U)lGe(q'r8Wc\B>Y0"jp9dNE*32BL[>
/`'/NDWfO*,meJ3MX,.d7TE.:XO$kC7n!Q5h]sBKUSUL<cJP2hQ>>uXW?c%:#9+]Q
KI3cDjH9+c%6B.5h3.TFee446DjDXpL'U+S"-BT5gGYfJB]#Ob:csW&mY)ro54_YA
Q#Lg(IW0H<d7Za##D1U/&M(4mQ>17H9FCstq^FS`IQXDoK"hT\l.d4d"trc%QK!gJ
D\1Su#BnAV_,4/GZS"U\\1PDM[r(>P8aQ@Zh:>6k`^eg:dKt+ajlYo:X18]<n7qAW
fqFilfhTJDJ_trG<n=r-&fk9)>n;EL>+85WRe[eKaRtO>/:2Y_AbCQh*$?TAq2;a,
P4cZWK7(0X:d;10qdV>Z!!!$!rrW6t9*5;2!!WE/!!!!B!$77@\*j:s!)<Rq!"/c4
!aftZCi_6^Eb0'.+JJu?.%gPAzzzzzzzzzzzzzzzzzzzzzzzzzzzzzzzzzzzzzzz
zzzzzzzzzzzzzzzzzzzzzzzzzzzzzzzzzzzzzzzzzzzzzzzzzzzzzzzzzzzzzzzz
zzzzzzzzzzzzzzzzzzzzzzzzzXHLD7__;Kamt:RkdCiE2_&/qB04WA`(tf-">=hL%
gXp8mrr"t3fE,@C@7SMhe!&.)F.>^Bi07O:)O=A4MS0>Iq-LsCqn..RQ%clI0mM8g
iXD==p1F9G,=s?,K8WkIMU*1FOnaa"c+k"S.Ra!lV[I2_.F6LR,dX8;EE1WbR!pia
R5*7CC.MQU#HBpU^4mZ>c5D'<Aj<Pe1G+]L_VVS(`)Q#c\2'%Y.J551CbRLgS<79^
$6&EHdHZ%Q^Sf&-Ke*P($&L>4HtHUr>5m]Bjr$BAmibi@?f>oBS6\GP!<<-"rrW6t
9*5;2!!WE/!!!!B!-GPc],gtQ!5AX:!#ttE!I&I&A1q;1AScE@A8bt#D.RU,/pM5L
/okN>F!.1[!@XT@!<<*"zzzzzzzzzzzzzzzzzzzzzzzzzzzzzzzzzzzzzzzzzzzz
zzzzzzzzzzzzzzzzzzz!5+Q@:;\asK^VIE6f^=K&tgAsU_e^6.te.HSP<Q*s2\Mq
o(JFb81H*i#E.W$[54FUnuannE_,'&3h]PFnh_Qt.'=M_\ro2-%i;]#EQD+s#-FOD
,<3!.cHk(&0JN,dXr#)(5"3#FoSDXi;TF-Gbba$Dnh7,RP+e5NUPA:Tec@A.Cdm_H
K2`)DagNXTh)<!^*Y"X&XkQlq\C^XYK#/`I'`BTX5\<*nP"]n7k,Ak9oJja"9SRcD
4TV9aYa\3"AdIHE-:k0Pend8r(@l6p+GuNtma!A3S.J".'`l>UQ2m*YeZWH5o:B*T
gF)ga(*SM"It@t*N2r<W6MekZ6V(kngREJ'<;4?s&'drC#lju*rrW6t9*5;2!!WE/
!!!!B!2#jkV@"4A!09GJ!"f22!-`@%A1qJ3@s)X"DKILUD/AQEh/;8_'tu?JG7].e
!mOi1s,Dkn,kbaRQrsQUm.R/%$<j/EmDu"oanaV6fSA,&?M'uU?#T=D,q6s%CtY+c
-_fZX^r3NH;*6u(4!Y>$*In"1o?:5V1%d*W>h$+kC/)O)5toIi?IXG8s)d,".@uS?
'A:=?(UY(Gec%?!iu^HKohAo>B@u_h<e]T,T3UENp>Ggc^L$Yn#<YB1LRD^MifT)t
_'$'FR7o.6f:N=+laj*qilIt7^n/T<GE&+_jOM-4N9>#bR1qfhRsB_4]((<LO.Vb]
BR<h/WqYf7eV[u)U(J2'm,E]F)=lH^3j$^>rB>GO=hQHYXg)GArX5c)D+E-<MqX[^
rNM1N78rt5rLbUu7s#!\o%`/h@Aj\+`&bjqCBJRh#KpEFkq$aim,CB3al>9&*bTXq
m`F"JLDe#ad)rZ2/Bn]*3O=@(Dm*#:1MDGCZ+)#O'9^\#=u&I2Z[?_pY).;(f%R;/
IBA+0L\IjD'in3+?=liD4LrqY[!Y6_gg/KC*ELp-kPLu+m]Z>_/$tVP"ac"^k3`8\
%*CB$s*<l@MT.Pi&_"G1e>EQ]-laP@!V<0u@_V>-=*a'eDesm7W2XO,e%WD*mNXi:
9DQ\&<WCS:/PZfG"O1eU?g4PLC]..1kMB,96,SaZ`:6!6#P&:]p$fXP_k-EDIT!nB
)00t-&!r<CI`:g-:Y/%!`EsQE;c`/qfbZO4SWE46`Hq=CqP#9G6G@LGH07!0b0!p8
CGE$L5r7(Bs0s4RaS6fW*0qU*k+\Z]5Z<"r#!nmXrno<t0t!+Fgs'+DF74sa7<fD/
.$tQSQ[U6CMIW@K\]A/NE[g]9IDiOEZ;%@%hGft=WMLLi[L(;q2"Zg`C)MCY/\<Kn
#a`j&n$_=\Sml0J_sH'(->4T%nZ;!1_N%3P\\i%4'CsI0Q:bO8S*@JNT!'u?NHo%i
U:g0uMp(t7F0TQi?S?unc70VV4u%ka8N&IbQ!d;>J?gttcrJ8Q>D8uR]YU3Q_Q^eX
&1MA#(oh[`+-+c4I<75&6bL"Y]@Xsab&+3a;02572##*4\!c2'C0in">$h#EonrRg
h"/9`dg,oZR'jmdEW`\%XL?(qjisrqq=-,qk'TqJlOAaN@RTsN$!VHT8pYha396AE
b&4V+-%sN7p3G;s;RDd=_oVF&4U\)i<k(V2LMl!i\/H(1o)*hh,NhQuMk_q`,AqBV
Z!QZ>a*8a!1Rj_Hh9kn<YL*e4@+4]Bl-?3m:R\FnoBpSppt=h=+s,-G20s,Q_<Na]
fU#@2dF87;@AP:aD"scuXKW_!Rqtf-h5fc\FtdO;W84Db8W6lRnATrZ;h@HVk8B^t
8(#0d`fH0>'Y+a?nVOR;>^"Vh`m/rT`cj(@m%GE8Kj[L@OR!.K!dr*pMrF9iLsFlV
r'R(pX(mH<Us/*"_Kg?*Y%@BLb!q&Fm&9A*R`19sY0D7)[1"ZDs2)?V<EZu$U.`-A
n$KM"`jXuXZ>?"gbE!Cla0RL4oe>uQng[Jno-sBm#C\X@7DCQ'n@E'F7(pdDpbu!A
)"jLKFN-Pu8mZcYk4TG!/]@%"X3oLb\%C/]D_RS.r.$Yb[6^_s4auq<ejMsDjoc,)
L[;c(&^tCjHXKMJ:'HLknD,iP,TV:i/dshDiDmm;+m./.C0Xk%H\6kjds#d*)]bht
rmN2a0A@>N3S'j>>h1515Xp;gaO0R,g:Uj74gYbfmL8XYho),d6MQ++4Cq.J0)Klj
Yij>,$Sdk>'[&5t\Ri)<CuiIA+t@&'_Er%sUGDI,NeQnJ9qR$6i*M_kQb+2;(Ss";
&%gg278'rONd5.'$&8gWP4SOb)5cc9,>JBB^Vs%BpY?3)]r@%Ajh`H)(5>o/*MMg4
/jRiTrQF?RW099X#?TbT-kHDIO@t7tOccrj[Gn]>an<s9%-0Ga\b:tEY(mnVOinj$
iCD6?G&ZWZfJonh*fY#I&BC._P8\K]BgIQ3(]5d6oQ3rGG?SIj/I4,D7Mmpo"bL;=
.rqf#g*5r&PVJfXU<F@G-DmC07X-SEa#_/T]Y*th?SV/)?lCDQfjp>oGi[Ao'>CZA
j3BCLI58ui0BF_]I(*9QW@%W'OILaFF)uc3bK';m6G>s4WQe(UgVfhXs,B-tQkd*/
nD!Nn26l=#:7I0E7je@I"8Um_3=D8Xq)S3cL'JCCG!djF+&:K:X$[KmU,>"!5hOW9
@JD*n]%n(jYdMs9crQ@.[;I5V1af?+T5Jl$$MSjm=r"/?B.777Qqs!7lc;>,\JOG9
bDpc%&5L-(Q3$U_*4Iq&'s6DTMb4i&hrn:#d$C]Od'l7gDu?/aS>a/.#YH=R+A%*&
ArjX02SjH*Yr5V[MjbEbc$NR2_$h8-\n[tV\njHGm>mUB2-i%Y)(ZG$#BCm&)erWY
>&Q,q'%&pdW/X,U;Wt:XfYh4$d`9]5*8*G&aGH2!<FkgtbKYr\A6WPYnWUL"qqeMR
a6=a6]O.jf"(LFo7u!pi""hQ.np'UMLRnf6beC<,Ml-9,@e;gfik[^r$&e/%[tu1J
9;4R\faq.&nbo^8R#!k9mVko-H^8B6YJ2$jA[%A.j<51*Tu=.Q`4!0aABkVg`7P#M
aq21<qUQlh4>Nd"?1-KV?o9JnLjB<T!_Uti"-5.0B<V@+.IXuEP&I-+Pi'9n0Qeq,
[Yh%>9:$kO*KH&s8A5&]`C2cg2lhm8k90foTg"u4L!rOhf:k'1o?S/IkF8F8>1DnE
'@i\QI!$_QT0gO5M'\OKZB`NqOgnqA0cLQtM40J^)a/<3\Hq@6bt\qL]>]du-\<@i
*?AZ\*A'.SFX0$uiT`J[%QAED1>/?IU4bX``rh#]O,MX/s/L7CC4U/aO&@PODCIcY
GaCX(8$&j+o8ejoC?U2Na9Du;QPP<<!F:k^Mg56;n7lYhJ6-7amfK\a&9U!VKcL?\
OpbP_CP""U(!;(WjtjuVGfO,_\8)4\9=9uIj?[HpMV5l[D;f(KTM7&GKq\8pCfuU2
jXX9=j]IR')6h8<]lo1GD$)$:HVPEs#6,<HiP%7$9J2F_UD\CV%oKR`.,,.^rXmqk
OI"(9b[>@aFhD*8!&=Z-o"6O]8BZpufA@Rs104)RZOL7ZU=*H=)%7PjQhNB5)uc-p
%XZM54U6?6(sTQ5j=NA#^1,PXb1U`uQCD>2(3[a0!=S3qJ,j]qZ&g+_I=bRW/ZmH%
iZ\cJ&fH"j'f8l*$lhYp5#ijb7J[id6I&F/CqjXD\Ab'jqNiiqN*l%MD5;^PmkXmh
n]O'A3c.E8au'sM$6]p"@$=l*+LjF^OC=IdJ?TLd#TLko"EQ@1pd\.q+m*C#agWYL
'sI=g#=W#nL#.83$;8HemrZ.@#VKr0%JL<42W"<8LqURNN@P(%rT2t9M>#_hi29j%
M5MKdp812hQ4psF8[2]`/T^#b`[jqJk4Z:8(.OGfCT6(GO'aW40!]Clln.*pHOmV4
n?[J/8qC2c.L%iaW%Nrpm*9H9q5_q(-=Q.ceV0FLArkhdC;!'ILCGT?\&T"hY3k/6
4<jO'+";DL_)>R/o=_\0=D\J)]<%eBnnn5GJoV0gD_CCHU1Q'CAi&&YE@Qf36:[PW
/s+ZsCMN@_eVSOY<ja5/nq!ZU"0jc6L<W!Tnr*)%9p1`;/^:/5ecO+;#ajK=BLA]W
rMA?>"b.%h71*0Y4lraSRZUF47e_/W3;NK#BNF)WA'akVjEoAknbsiT?mQTOK17A&
Jde*15Wh22GU/hGH"u<#C-'QO)frIto49A;1$r9W-^2hTQ-[QWC@03qjVp4J:,3JJ
6plZ")%?J!MV%2@Vdrqcrc5rsh?K6\"BYXJ!:aG>G*B\$O:@$1K\_h";T#ABdH8'0
r]PhXcjc>sc]h6VlB]8WIg!_'\iM;a1\7dqD'<G]LdrtNPKGd5!J:t$N.q,ARo-"0
Mni^_1!O#QRb@`K,>]6;Y.2,F51$ZR.#&:];)&=s-nTJ^P&H*k.#bAX$iV3[b!pm<
#(J;(/F=3L(kIe_p\lJZ?mSk:"1>+u2-33Lbt&s`,?K*m.#\m`R+]tr(38)tWkX/H
ZE2u>eT"#K9\C*iA=:Sn^Cpt;++^;'][r4dAE[ULiWbgI8f(#K;eE"%a1#=7^]$=@
mq2\R")&R+=t_.e.Y5r3bK-d<$`07A:(+-3?tIEh9*[+Fas]o`X.3lbW('*VH90D.
J<j&=LC^a#.<cZ?_b[uU#ca!i0tA8fn1oN\+XmUGYrj,8<(JSeVg&XcGT#EnisrE6
`n]$O)(q[8>r>FG$qMrRWMO"dIm[2t9)&UiV(0C*![()j#B)nC.7c$j>4[Ht;Gm^u
4.CX*rs4K.F9SY?MXbBAE)P@Y-/^HYLTs[j#H=Ol+>e$S1Mc\N;`3Je!f&MuM9B\q
5\Z?ZQ8YYJXM$V)Wf]Q4:'Wb;^gRA$%pn@bZKMa:pp0>2jiSkT*(Jj?(2LDB<W<5i
ep<^[*%c)/>VeN6/d3;;kqTND+-K8_E[b*46ZT0T;E,qg>4aj$Qca#jOBefQC$t.%
K=t%pNu/Y<F3Jl[S,q]067j#e9U.kV+D569/0pVBbm&4.Q3g$[2MGPB:>3BBGdCDm
aE&0=)*lIILC[_QR'LgU82)?jC3$TLJ=HZ$$qW0UM<4Q+fi-1Z00Fhuj:G)hD?`)E
Wm$eeFaFU9Gh]n[`Uo<uk%n?.1/'ug.2_s>:->qLoTiY#I`O2H)5[Ci7hi/-6\[&2
0ND<JKa^mXNpb"@ab3IK+$m/bY%2$RSqo`aLQBS9-io)83/iR&4\.8,!hk1_Qs$a3
MPfP5R5?$@!f9c@:(&c;A<`nq#tO&^a8q,08;uYQpqW,XE_D^^(u(^PauFbk0`m2/
;@HT8I6Q#.`$hU0SQp)Y!f7L%9V&ck+i+j<QoY\1"'_WX!UtcZq+%)l)Xhf>0X]1%
+Mh$_-fgVEWHW;SnH;eW(`%]K;u->6&2Xa'@Rr7S!hk1<O]f",8i,'P!WYFep_a^U
kH/94fFfZ)Q3R6eR'a\Bp]3(AB9_"q_;@nrf?!o=$WJ@E/GWoT^s2q'L85Zf`8Z0;
X2*#B;`n%`Fp9qM\AKl&1&&8mD.nX4h2@^Uk=VEK)5\Oo'FaqY3V;K#-"NCC$o\QE
.*8imPpZTB=ZCJ@%)e$>8cfR#(_J^eOFIDP&jd\(b,D:cKY+2$r`mHeo)d2!eOZpp
ZE;%Y`<.b)SBC!uaoUjFT"I&6hjul&@Jq4@6X]jaiqIVlA_LT>V3!>HlVBR8hh(N&
;9bC\/^o0?3,Ko0BV)`.[(fKUoSsf4g$q+:W61N/adp5qX%(:?'3H5S:'QacA-i7q
dD]mu-N=+s80D6NABB=3RT0F&$t/m3;]!-AoWehJpWGuY.lO=8aaXXEr^`i68H*[n
g5"`RVlK5b8cFpIf/)l_2]AF>`02CG9!tpiWX:nj(tk-Wk+.DG2C!5K8SNN#7.rLm
F79#CH]cP9MO6&j3"ButaUOFk\eb..2q`-,?tuF%Z1oi\12=u&&QoO&2%GHIMf[N4
+5NdHiR:Y%#o+lq1Rl5HDiSNLm+E^d/n^L5,?&kb7Lfog2c$M6+Rb\&Q0cSE]Naqs
0oc7"U/mWi(fTF2`kiM/KNq`s\gc!H+kKa$KSE`9R5GA_[Wo-0FL,Of;5V_5g4hrL
F<JCi;&]j*jU?UE84q,lW\$cL<F59N?e^`@QECS_?;=YqG*Ok#6/n8qErM/5;+=\l
0\;Xk1E'd5"6X#'kKbusc,i6%Y_$C_ojftiCeb2?L-aBE3?boU84nJ+:!5Ed6e3s4
)?rGhU3Ji'RfeK99:N0!H41,Z0)ttP!<<)c?/9P\3#6rX'j&(KRuRq9#'rfT"Ho=U
m]KO;<I:k#!]4[DY:N$7]Zj^LjjlU^?>PZJS)=j,g62qc:bKPLA6GPM3M2>-K9Dq3
A;P3W*%-a;MdMd`m!#i'4lEj-BR3+iAQDPf?hX7(Q[.TM9\p)H-;ul<jVa%qq[LR`
\F"i3BW-%O!5E!"OO`;@UpT%S7cu%$CBNW/S;BO$EPHLM@sZJ#9UlQTm,d58[[CA,
aksQN\`!mRe%BF>CP'N>Q,(1JW]ikM^N?`DXP?,"?FFAp2F6M_hc*cc:tLfDOT0s[
ktDd#Eh-h!U/d%HIhm8.KVHY=_saVJ`K-8U)eg]W[YHMh:PjfdMi(-EQsd(CM8]m,
Jes$\gBil"r(]I>M!6a!4[fuLGgVuXrTQB4FqAa8Ijaa?&XhQG/2iFDX<jj7oaA&>
LGYDcTpR/,c0I@[$$gU(LrjsabuQ0j3Q:_bK6E&,GX7i(b-9p:h=g0VO<tTK9I<U5
=kcji97)1N\*<*3^P/.rl6?1Y&WPtelg_.:BU>%7![%8&O-O$DoAV#?r.-[Wd"cpu
VNjQ=S>'QkaE:[9gHLpAA`CL*oO^9#^[c&A@Uds:mjtEil+@BRY-4-u"M9WF*P!Cj
$f9/Er^n_j#CS!r(p%8l^s_m*OajEW_W8J+HPcf9h&fXFgQkeI`6n[tpT.m6`8Ys@
d(Slt%R"f=hc8bhq&?*Q4*Ll[`>iXtk#c!J9IsLHL&AVba--IL,lbd#hs@?p]@.OF
i0L5.T8N8(442BVs$R"H%SiGZhpk&B8`9/49:E'YqJ4)]FM!6SMZQ*bP#9`J8L?,U
[e>[^Il+7.I8@Fqcbun[R^:dgF*19GNr[+F0i#f[:0CW6f<sQ`2SA+L\pJj.db6QG
gnuI+^h:PX:/%sAjS:^F`($*[E%U@^JnEUl9uQ%9G/`-./8j33Qe:Mbg8])?P)>*K
E#3r,Oth"C\'bJUN@qK`,rW?Q;TqF/g:m7Q%@r2QqAGET0!XJUU*nuCG*._HG2R&J
^L)P&l4V"!X&Ya$A!l,t[bb$ugnuFjJEOH(?[EbRo[dT@mqo/s?,`+46SnmOf;W58
Fc#p@@mbVkgT/m:%=mU_pNWdk#fZ_b8AOhO@hj02fL3AO>a'\5W^['_Yj92_r-71Y
5:OJd_AE62$uPd6+ge`AFK?Kd;@@l;_AA16r>+@Mmo6U`F=a=rnVbF.9l9g&a]`Qa
>)^DZg%\!7mA3]GbOOR.9d"qtMeVG4P0,DVfE5"[`Ssr+=$L$hU.N)5%:LtbR;Mkr
OlYuai,pi\FIVr\?aSnoVW<5opl?4oArufTku];sdC6#`SX.&ej`IR+HN!@5=OpHY
W8:KeeVcKN4-#KA1F8N2)Vq67V)'U<6U!D=4<cmd2bY]\b0E8X0p2->^Op4ML#1Za
Q07GsW5"VWX]9KpSM#[%m/$rU]`LEIIcIh4f&_X!IEVf(.W$<C]YjT2$2bC#r,/jF
^'`$1)"l:4A.KB]oC7;:,+3]R,De,SKUSMt6fqMb`GBko5WHsNSAnMZU/*1hS8WY4
+90M\6t/P2,SU[38OP:8(Q,K>>urW'+F<M!!0Ta:CdsR`kkYnpI*EHVK9ScC(.4P?
'qI8^Se;P#8-Fr;QFc1S_+T75a7@1qQ>HfmiT1`HmdhFhii8H[Ih1u0$9];;7FnL=
89Qo*gHJS@>WZod3GMOKKIR5?4/n!#7!YPJQi/ArlgpY1[m_W]V$lmqo)@2rX3MD@
IVGh7nXI,:T62F:8j]$>;e8Cu6L,8-_\nq[Bdm5`[#N)K-U;\t!FLjT2g@rLSD\mr
\g!0$+?6l)5r)>E.&*.)VVFL`2-aF8?<p.9KQj;rf>C0>A,Opagsjo?1MFC%Gm4[K
67"R[m^V@/L/**V])[,Nn9_ptEko#&@(mW[!30i=IP[TS6E,e]f>bD';DKM?]7HWu
?,,X?e\-'t"7<,*'+k>%&lElq<1)T(B\YIpr*r&\L9sRL^$t@*294s?L0#?egi,g(
i'sam8^0iXKC538OnR)HZZ&Cr3;^cpP!IlWnMqA(bGXNKT?ZEf-FfT/F%he;>#cdu
0NrF!TrN&Yca^[`-1%V3]MW,!Rdpg\+Vh3foG/=LE$5H'>mi#7(6g,uN2@J7Io#bl
86aDF8r2*fV<Sf\Uss@[A_RFZ>$02<fh0V6LZ@f!cGJ.LV)9=+"*`h??n4MS["?.q
J0s$)<q!>Z:8aSNMDCX`VUF<T'tm:V:$!*a7<N<e;`WVZ(ckEuUI3k0\HM"6jUquM
f,K_$?%S[c_+e(o3HW2':@%?B[o#3U?SM*p`A+r.UbP`\4f8_UN!J%t&fM4f4D?Mk
eNQ*"k&]9B)DGUU/"pr0YZPEa@j,FTa8ZDt`s%j(`[m=S'FVV&:d.PNBJrmg5T-+F
.(I/'/J:I7$2aIKm#bJsTuV_`(Ja\H/g^F@N(5ARSM?I=o^[!fOuU1&qH"#HKZTWi
+c?k_3_lFIGr:Omi%*XMB:\ULGm=j/bD#1T7j%;b:@I8lcOsJ5\#YkYB5l\pjDG_I
pjuLE=:4;aX-^6e1tN0V2=%qg6Ep8a[[n-K\MJhG^';<GUUHO:N/=ssksD?'r,p@,
;F\3sb;(ObI(a;jeU/=UnJ`rEBP"5M/F_u^:m^o-qP!kKgoJ!\56(Z`s8N0$:eLln
$31&+z+TRI)\/'[G!W[h%!WWr8!!%4]Eb$h?ARoL`05593B4WeME,K<F:ejLi$5s6O
!!!I"846>U!!BG*!!Dct"onW'74g<l!!!F@BgY6a8OGif:i^JdBl%>\!(_s3<sM]'
aVpaT;FtPQ#Y598$.>l=&6]&7WIg+k";4<8#slO:():)dLgWYQ7;T"T+DX:0AJ+9W
Z(RhmMn1<ob+"KCY5?@es#G/`b;]J!mEXe<!2.lcP=kFCD#j,QKsHAf&D#L@F;ChX
OF\J"!DK0&j3+:cq"P[+A[)3H]Xn1UAUi6%C$VDOs&F.E69-+fA3@eu!]`Iei[+Zp
omEa?&-/Gf\"$>E<T6"MlcEOb&?f-oC_bg+`0i*&A3_LkJHKmB!+["/-d)]Zo,csq
7Jpt88+RD4/eW_;!eAi-L]dGsScE52lm))m-S'0?`-+sa$8IJEpgeh`1])+a1Pb>g
GhGGdQ.LPJ6cF([*cKd4=do@Bq0@i`+#^@N7'al:AcAog[rNid.kqLm/kKYkS?g]W
pPK-S\c[I\7>f/sPs/s,QZHR5i#;p"MguT^%C%Y+iKCk+(c@qR,nB*)$s*ft<F!U>
K%L(_77)9%U0;39CiY-](L!.Oj07)33M('&YL;#)7;akbD?#SdaAq!81lFdoW=VuO
[OMof`'UO3Z*QPO0j:\8W`[2r*Rp3#&sVoj6(B'^7"hN*@msP+n-$.JBtesK?Ym&>
b`,W_",3JF86()B;gdFer%Jqg<@D9'&)%W<a2SPM+qTK`WH-%N$RNoOC-0,W_N4oN
>b!:gMc]6)(;d]i-#WghLV,$44VpmCKSrc?+4$)c`[@bF`/A\];=UZ2nDtbsE'PgZ
!<m;-?o#e(ig-bD0)/'s&e9.O#-rdk32r=^)6!]_')5-'`S_8_KKq^X04\Hi#`9c)
H&,H`SNtcAB[OVS>jrHeHk6bXi,?TM/BO!_'^u5\idZ49_8_9#k/!o7s7cF6qitSW
-:Z6.#!K9!"uV6G`)'ng0q;p<)rZ@X599p!_6CK/5.L&h*aeRH:C1lk7tg2]G/EW<
id%iuU)XWrU&AqQ/Mb)C"`=EZHK$)m!434fj%S5638kq*%iZ%2Sin7?;9,f?$L9e.
J'6c>\"VBJ\56#E0M4%<me`E@%[rtV<g:#k[Q^]n1Pb8?)&i>-5NeO$$Xb(T]dC/n
4,BHH:137i,?R*:@E5VWlk4J@M2,-`PC_7AkUg3cSm5r!r""9>[81?[jY!qnSM$O6
@the!L!#CqR4OmU'5*41=`!kU&@/eY^@MVrRu<ad!6T5>lL4$jF5S!h0J@h8$CUta
/VRa/=,po"^u;0k0]%6>/Dn6[ZQ+LjXaGi(8B'Q1#6FfsBYg6O#Y]dqY_2b]!AE@A
JjC60!c]=hUk+B,as+@@ARGk4!TntH:^35<24tRu!aEK9YQl-Jp#$*8!R?4RTG:]:
GN%iO!&$VsGR+'V"<eq1KRjsaAr&>(Lq"Tl80AP"`#o@W)NoY^,8*CqbWt;8A]RK>
'%qld+?q*+OV>f]U^ako4@D5m2onK'6YWJ?C4b04,>fPINCK[7kQE^]/O56A"mAjk
!j+q9UNPc,oHJT%D+@s-4W(sk0ICCl3FP)g#E-LJYq/S'c,*)XEi^26M`&BGHkgG;
]!)])&SL#Qg^1.A83@dQis#3/HjO,9n&4P];tsAj+l83.+j^P8"@n%cJP-hQa<jS(
PRttDgBiW@Vr:tI+M8p3M+jWqd2VMm1h$r73cPIG"*#EfM:b:F9^Epb8;8B[;?//+
`$6"[8kA8=]1L%7=%F@-?EsdgN9j"D-`<.SjE]g,nh0JfneL^OEZ[`>@SQBf`)-Z%
Bp<1nD3RN4AP*3(O/bRTV$9b[W&`A<e-bJIl=oNHl<=],%1<VPNA2>\NB%ml)Z)D;
Bfso?5guPicoAE&1^._FD$R2"G+82k:8cjnKB_Xm6MaT+%K.RN!PMQuU$8Z#eJ)]B
eu[<$e%DFN8rKETXi8k[W)]p!Y'!S,Z<!;M7GC;$UWq8ZV-TpG=Snt=Nt+Ot<@:Nh
?Y>5@/tMSpcZMgj2S*>.!o4$k>BNa,5%\129*U0fB?Y")A"7.QkRmK(osf<.H=_DL
oNLmuol]pjoMbC[l<!3leSf)09H,=FRE&RP4M\VGr&Do2(jhWhf]$=dLKtekhI*iZ
Y^t/oe6nobFb>a0/Aj0Z>f.;2onN4#E$GU_0h,*#2B&,El5Hfagj_;5Gj4]"_s\G;
`X]up`m]pV)IG8f0ekPB0Thg*1HB0tA]ch=2U*s^D0jF5du7]NBI5WAD0F_$"\YK,
B'$9I=Jo9Wk/QPGjpL]3jt5_D(:G"#(@s*N=kpK^>5D?5=g#2L[d:FXZPm[<_lD;Q
N]"f0a'*#ef(uK@HQ-1Y<1AS"oet-5%;`S``O<1_p[%*e6$<ETeTTR2M=s.,\b7!/
>9-NF:C!"LQ,@0'eBuH:m'sm:D$4:#mg.$kl4GtGBMNBA,,\VBLX&TV)!?1ip!0a1
>)c2t\ROXQO^D?U?1M7/\_M>XFcCF4kM#.r`m)>ZmoJOnc(48DmQTC=_>UcsUPI3+
UW4r^L?E6rKq?P\T=qnNA6sVr3k_Z.1VD=dht5=fM>(04F3^-1)r`s6pPA8C5;0c<
^B8q7qE+N9qX=!)50A&5E7D<nNrpp7GQD"Mg&kK/)1e7ZgOm_&GX9kGO+Js9"i8rG
T<[e:3UGSg=!91>ZB.Esml>ieR@L-N/2SQX1peQ&2_6tj1@.<:7<j!#D0U8XB>jFu
VFX$aFQA>#Rp6UZT3K5#Nq/4!)0IEt(7c:J)>tu'+\!6r3#WeX21!g:Ha2/,P1]Uj
&BBc7'mDn!2SL=5f.k2unRJT=4ABchR#u>GOc_UPEED/3Ul_B`8U$BcOql*`.9\1\
;ef4eVhV(O9Pkk5EpV#T(Xn>k`+]\FV"BoDmHHdo_T&\qf.l-'I*).&'5T$iST'%P
dDW\S7ji"Fi_;J$6-)UAfTku`(WWT=oji)!f4T9u3W-;_Q\&V]C-eaO5e'_e/1ViY
A_-J>JF$:hSY@6(\Yr0F&Qaisk="HKb'BTuQb+KO5;+m4?TpJ7,QFu9=->'o2;**B
eB)Q*7qmge]tggZ9gQ6>>..^sa=#%J$ME>NrfY,nnUoh0;.*7$;=Ba6.0ld99U/;b
1sKI_ib?_r_i'#5N_eh6Dk:B$A+#;21YFRnbX,oQc>&qf3IAU/N]@\mG0Zr0c(4ad
4I:=DkP[8&Fai?PP6H"C4T6M`LY<Bc&m<?$L&MH=/]&<\(UYf;?bC:HQVp-6Kef"#
o!2%ape*7;kk\f.O8V_XQF8@9>./E2EOfWUN>4`0G-9=t=hO=qWmRm4<jPhnY5W4]
Uc%>Y4j#^cV63h"D6JbpBNSoTDY^k>Q(lFe<?YB>ef1f"]`.j6_1jHZK/`5SA?r1N
e&T_mc*t,LCoOJDW@m(#gfh)Xl*cgnB7KLJWFicip9O(XG=ZnamnDAZWlDZJAs`%j
A[Q3RU:,.;pt`'!6ME>'FkXH=+*1fBI^!1as2E;%5MnF3IA$D/cb[<0=T>]+&E?T$
*E"huY.J">hqjIGcuqD6E-%e(j.ThNJ),+_r(,@8rM.Pr;3*:gepk@-GYaO1WTutG
M9!l)RdZgfHh,mi0rJ2M8"Vth-N)*0Zg>$=cNTh#Eo-9_i<qgcl7[HhXLmP=l-O@?
^E%(ZC8ni3ICZ'%\$`JX<84Z.6!$fd%D@)M)Y_t)l`o'rDC",LF`[K*p03,QcYr"&
IXS-X:>akfpB^Lcmq^f6Ipi2IqKMhopU,@U++5"&nC")M7s?'H+2<1IJ+BRK_,L3Z
nn2R\C7`%#5LLG+g%o15MiO.PQ[N-cJ*?g8rfu<??iCK5o2>>8mZ,o)fDTWR]JY)K
j"HJ.RX=%@*k][GfD!"df<BJ^#G2N>5GimWei2\(ku5Q6qp17/U;,LLcgU=hnmoCa
UAtK;R["&lRiMLUe)8m[hV5!h<-Q.Z5udU1!<iB8<o"Ps`!_)9_#Pb,!?_T<;)Z:'
%5A=cas2:30L4IMLRME-=mg/W>;UR<,4tU'^GQ%Be-Nj&=atqYLAq1ugL.7p!GErZ
h*I;mKQi0qp.EhTZ*,*o-`[(.2`Z?E"(_TVi;<L\o\#<Kh8oSj!!!"VAQVN99hbU;
!!!!)!!E<@!!N?&!!*'"!'UE&!!N?&!!*'"!(Hu;!!<3$!!*'$!!%dg!!E9%!!*'"
!)<Loz!0@0\!!*'"!0@0\!!*'%P(irA!!!!3!!!"DTE5)r!!!!"!!!,*TE>/s!!!!"
!!!,lz5uU-B8H8_j;e'iZASuR&DfimIS50+b!"!U8=`XQC(*rq\(*ruQ;C(`3!!1\c
<*46E9h[TXDf%+8A8bpg/pM5Pz!'GKeG\qD:ATV?'G\q87F#nP/,%5##@V%T<F#n/L
FC?gH+F#qlD/aT44X+!&:`r,DEb-@O/hen3,!H>V+<WdeA7dl#6q/;DD/=*23c\bC
4X+Q]FDs8o06_Va/pB*(DfTJD0f_6S0/,.71,:G%A7dE7H#@_4GV*fS,9f;Y+<VdL
+<WdeA7dkjATM@%BlJ0.Df-\<A7dl2@W-C24X)'W+<VdL+<VdL+<VdLG\q87F#mlW
BkBLPBQS?83\N.(F"Um3Ddm91@rH3;AU%p$0/5(50-WRe+<VdL+<VdL+?X4[BkBD&
Bm=3*=[Zt@ASuR'Df.`n0JP7D04fBBAi`b&G\(\o6tpLLDKBN1DE\CM+<VdL+<VdL
4CrbOAi`b&G\(\n6tpLLDKBN1DE^';1d!F&G\LbN:hb/cCfj)>D.RU+Bl@lQ$6UH6
+<VdL+<WdXG\LbN<HD_l6Z6gYASuTR;e'iZASuR&Dfe)pAU%p$3`U64E^Ob^D.RU,
4piDT+<VdL4>1_cAi`=kF(96)E-,f4DE\CM+<Wd"Eb&cC;FEu<$9Ttd3d>L\D.Rft
4piU8e0Y.q!$#]@:K.;o!!3-#z!Vl]q!%7gI!Vl]q!Vl]r#=FVeP9'](5QFAD5u`(0
m%"<m'NP%NT,.kC/?i@K[2UYJ/F6+c:f.6J0X7jo:_XX5`GWU(&A,Oc_8O:3(?^1]
kKhh*G407kmbZcH\\Ib3/A!]ZC;)KJ359a1o:5hK/t%k.Lk#beJ-^s]#`+!:Lk#be
J-[uO!rnC5D;nVfh%Kf$&-3@S!>,kD&J+sT&-3C4"=.At,D^jULk#beJ-^s]#`+!:
Lk#af$N^sFc/LLXP9M+N+s6q2+9E`0![8`g+s6q"Ydt'-5QjJ?"@PKX6pLlC5QjJ?
"I]Jp$.rj0RFFe?&-3@S!>,kD&J+sT&-3@S!=;la"!Sih,1+O>r9$<EBkBM/G==b"
7%c@<=ra:o:<Fja/X_+lCeMM=3d2/IJS%J=!k)6<2K`1+7%aYa'!NZI;AKjXi<1E6
>PJZ#dh`#sBRU)9JCQogq-?)T=9M#7R=LlEa]u2S"@Sn+!=@D59XI:m6pLmD1]\'X
Re5]=k<qQ<armA?=rG[d6j-[A!=@BoHJs##+s6s3Q[f9dc1fqkk9;#MaTV6@9BMt^
+s6pr#tViiA>242+9Eb6U^:_-f;('\3[XtQ:^-q`f?/W@+sPB##tVk?cjR&+(',"\
^'$:>CVJCq4Vn,281("m=u$o]'`en[83d6b+VX5T!>,lo-;?`-]dA/Qe2\*PJMIMp
\Q/nk'bQ!48jEHdKjK"p[Kq[So-L&\?LtjRlF@1V5V`@'f93[XY6]qL6NRn)%@Lmj
#`+!:1hd"0kV_VJUX"^H#a@V?ca>O$WJChe:]_96/bHpGZpd4_RP+[NoU>6V;pRlt
"Hj)T\X(H.HUU1&)A8-^D9,+l6pLlCTLfgD5d*ad*d(3\7%aqiHENM69gqICKbBJt
D4qbPV_%rod!Q.5T\"RpSU)mi,*5J`ca@:9g+*4Kd#`b\CdTQ',6B&3!_o,6#'s#?
nu-UR+9H*ccuZ;tBIY2-/X1bgC^[rG3c,H?J`]Tj"23iDmF61h&:n?nHEJQ8d9[Cr
JVF:Q?lLlK*YAqa&STSq1sg$dQUdS[!>-`4J=^Of5Z87,BV>PS?sDiKf4g.n#W,li
)X''9CT!b^J-[D6cuUe,MtW$Y#W*eL!S`]mp5"5)Ld7.N;!pU;YJ:(B0>@4Ukder&
s84e2FOLuL="M79n%E@8>]GI?l-dPZg1mZtfulGUo?TYUY[PFcr:of*rqY`D<C_*Y
oZ&&'f^60*DN@!XW*OoOoel,WXkVtZmGG[n*I-Ln[`05$1cSPrI/W`irk;Q^l(o==
05!ch7<\@S=5,'kCgmc(Zqrb_<2C"QU[PqoY5`=C`>7%5D;,9f55F9'pAXsXBD/O:
eloN;Em&%&\R$LNNjR%ih`S4uhiFtTqT<,km5:AYk*^)BFk=lKqsM)bm$D(.a_^Q2
i43g_Fk><=J,Ykh^\dH2gCHOH@&$5Q[Vjp4AbMJ^UYP$93GkaS#`(`%-f?'"8g5AZ
+s6s3Lk,A@-fU=J\\W$&gi:A'F3QS/0CK,Fd7,'lj?Mt6^OEQ2,)c6pYJ0jJg8Z+Q
^[8JaU8=/Zb1Cjb72Ig@?B#t4IedQ^fk-`L2HEslQ"j:O,jTED-JEI[*M[>GR3nA>
[b5ELa*P*UI/%Z19q@)WE3AV_7F\nklc=pbkdTGuCN-qV*DW\))fE/oFM\>3PZ,50
AVL[8)RXA4/ir3hK;(Hq\0LkKpYQYMhJ9=.+t#@FP>40\J"D#T3M5cl?[n%f\DVsP
hKe:Dk*]kR`3Nh7kF[5F3Ir0P\DiC.Hgqc_o?KGV:uhau[.(p?qeHb72,;g$j(Fs/
VJh[(*-3cnr;H^!#"1QA]Q</PCo3f25=/Rgb:113Ld9-.OF@>^negVM76guDTLf`o
FJ.6tGAf_@FI'S@o9qdeEjX(LgI0>UP-r'[NJAR$aLBW#!]K\/_>;Y4@)I7NCLkZn
Cd$MOpYUIqkF[5f;8D"8o?G[_X0*B>o[?U0CDD7BeiJ$C*1_9,Bbf/s8`<7)-:M4P
G)[8BE5Cal(LALn'`o/5R[]mplDa"$CTi`OZtWH8^ts4c?'2J[7L(#_E9++"\^bpj
]@q##7=G%)aa@EBn\qSW='g/`Q@S)TZ,[n)+`r!iP`mSFY*IJ5b(tQR1f"/cYg)dN
WRi=:!\Kd)V$"D@N]AF`^k24G\)330qWO]Sct,I:?Q34b0#%,?/OI66=7!L)fQstH
^DZLSqsN\&Dnh;#Wp"Za^3ud<QX@ICd8a'(Y4+[Ur8TB&$S8MI`gU&3c?o[OPZrS/
eaj.#-_>Q,RULpg]I-1i+90?43rA9M7jCK^.**Z*_#F<,hpF4&/E8=hnN'>A?0QF4
e97'P"@SpY'9I`]rmstZ+9Eb6_?a+%d*!eE:NA(EDnYh0Vn'u']0tte\"<Wd[*qb^
K2WBbIeN6=gMRUh1>G!Y>]ND#@.)ODPBVHI);RMQ5Q,[n^uFdml`RkrZFD!>E'N-&
j,O#O,EFt8mjhEdRI7WKSnRN!f8eWk`G!LRf8O=0AX4kJqoq(W7(mp>MH3npV.e7F
(QI34]a/iBOKc<=n(p4md%Nh6fOBb-*BSG'DS5MZE&dG`4u_ZN+31[0`YiE62sVcU
=<\Y=A4S&>RmZDcJ\#N5O$32mYc:RWc-MBRSAH'9D61^/#7iH0/lR&^#O^Gg(ZKi0
`en=*I,pD[+u`RYUAn?J?l0M0/[jM^CN%nD&pV>,8,3(=j10$5s5Jqip5H9=E?0W]
CFFg./F?gs`4a[Fh$f):p#$mC(BP3c<8<,bk2oBbf@GKT#A3Puj-EnenLii0482e0
]B5Ptr:0Q)3r.j#rB5t%QMVofaf9$s"toSY,G0&&3D#!!hKS:f[mh0?G[\E!JhJRh
RD7q.0>BXGn])`H%mU!=h]#.4_nKR](AI)>(ZNb)qojuIq<"/"_DRjlE\5s7*HdV8
%t3HK_C!C!RNu;*+"kR8>.'7C4PnH@P.rMqY*Ie(15^Sf1j]9:Yg*.[l3'L?"Bl^p
8dBZ.^n,uJg!SHWA"sPup`RGU&7P(J)fKtk/q?UehuE]-%q]0tq;i#o(LY:q.(UN^
d8a7Rjc@1KdS#$3N"Eq=_a'_+(U.^cD*g)=iYW;LnMm-pa0&O8/q?_SrUeQc0n\+I
(fEQ-&E=D6c8t99JP(8AfM+3sgiIfs6_?r+eI=Fh^^nXLT+tC/_$ef?Vso,P%6&No
8,W]?GV$JnZG&Kq@EkMW[(YRe>Pd65/<7RA_$;'@>js5Xm/l36bVPi)VO=1Wp=lc!
]?l?.G?dNOC,]HGrgWo!i'..Q&PS!N&f/_PkF=>K6&`J2/h\Y5#K0;,n[@*UG8E@i
6MMa*k*TWgIpEY?UpJ?-b6qD>!U_8:62UBC]h&,$qsPat'X$d.-q"^8;($ELZ1bKJ
I*RiA]C.r`U>kjt?h^'$47"YnLN[W:%s'LoGE"<>Ka;-0hTTt69"5>ZcFru/RlNTN
i^Eh;"1M`m4SKE]!VZlk7Dk%R9EFki+b/^LLDKfXGiFSM,+7?$oUl`-r8C'Q^[W]X
09S(.@mA*NYY5q-IceFe5;K,TYmDrK-PFaV_[euecS6b"+'q.lVL/F\QB^?^:YHN:
93Y0e76guZ*WZT"Q?USr`ZcN,c(%%q"2,gb)(6`RYRk7iUY[,$6%kn>hmqpARiut>
V3h#Z00=LRm--*(@8J'2%G$kN!D=:]Y&OKc5(lB:Y_D@1S75L9U)FYqDQoi=!K.,;
50#7XkFHgghhUD=mBFJ<?Ap#.82o@H;keg(=;[-0eY4Xs;9TKF%2\+`6Ep"We5K-h
]=1tL*<uHFa'j>VPumZg#T$3['fo,t;8PP;&Qu3kgu>"LnTiF`^`jq0&8.LTT*Z/X
pcd_1)H+4b"Rh:*cBnnp6l?dqfU"nJ_&hQk5Re#SN*tZE66NgpZVbt@5^oe_>Skgu
O$2Xk$3HOZc966a!=+;CHp83PoRl_a)m2cB+)-LY\aqaI-!5[Xc3p#$&9<"'\>[#g
4u`T]MgBU[;+ZkDcpmf-0%q[t)KU@A)h./6AOAG<O?\,Z.prtBe.!5>OaAJZ>!o+K
-G0b3=[X-6+N.2B!W25ichdS<qXobZ0BkF_n50f!&J0M&"SAK<7S(Qg5QjKJM%Q\.
TGN8n>g./EgMXW?Q@L9].Dg\QF@`opNYsXmD^&^uH0#bo-4mdko]Y&!DnbIs-OEn.
C*<U^W(nn4e;oEG-X:,5J41U0kBI>C0:W9553cSGNqEkue6H(t:u3d.j7D9])A4[F
LbUH&,R3YG^ETDVY#>#fgMcPA@Gtf[2kk2`oCN2"reZP(%Mrk=[lAsCZ%m9daC&`C
4@m-'^]I.ShXF[o\V]ns2PbTP%mTur5:8"d\bY3+kFHhnj349WVsqP'QXO-Hj,*a=
=4LrTH,c0]!]FlTVAi<!l\-okDsg2G++O4YR4RuaIJ;WKIqE'c#Q<gFY-meQ`rZ&L
e;/'s-2/-@1F[=)@+?q&@IA#N_AZ02#ip4;<nVl:eB/N1]S)tAm`CQB<>LXKUkD1,
1@^\CjNAoYn`CrY][A.LnPKo"&J0M&"SAK<7S(Qg5QjKJM%Q\.TU/Hi1=6'^P>AL0
Q@URR&Wd=.7L$^!`1S+oLP:_5VrXsJ^f#Bj3Y='qT5-$9$eSTpS^e+U>jE+?6'`Q8
+WdmL#EDn1&YM]E8\gLMF2mcDU-8]1+rZ@ki\h'Ejr)TBY(3?R^@UDf;MpB'NYcFh
WB?mW(N9/&b:dpG8^*OF'iDO'j)$T-QTF+m.%WZ5"QSp@PdhL=@cpD#MAHCHbIl2.
DPUZFi7X0H5S-\1!?8s[Y4XKUb;)t[LLWH;Eloh[5P'Ss.uNhN>MK9"cd)t2XLX$K
M!`t3/Bt`GJn6q!r7uAs/?\Z9Dm4W<T-4(%Ce.0g5F-QV8&nOl!=MQSJ8O".3Bg%Z
+9E``N.@K6`<b_<#`+!:1bf&s%eT;ufPm:80!)7Pi0qc\):ud9eWtKFLpb8FJ)'2r
EsaE0Y_D@1W,V/1QZs^1'J?sBk#mipG:d#e)V/C2ig.-7K*DeU6B:u"L8:&0^_1K!
M_=TO&NYa+@',rBg1cHPfL"bhe.;8l7:`ZHF6gW!a>kJ+EIHu>\T[#QNUoHGE$sgn
4Q4kKJ0Dnd7X.iqGFg%).20WoXt[c9NE)SGYE['_*`!;/n:9E?'sO$1G+$[K/#%WW
7\H%l@.?4L+7Ho;?G%4@BGY_WnLbqm4XFI<76.DF)&pCJ+9XP0<J2.g"=m,;r%06I
UD*4\$fVlU]Q7AUH*K`PZ[@Ti`B5s9.9to;%W"*??J$rm3Gj@&+!hL1!>-_L5Ym8H
KQLH%6pLmD(kG9aH6L]b&U&4/o,/-m6,7L\CF/DH"F7l71F-3TK3Ku*Jq,/o%OoMR
(q30A*eK9&BYnMA.k7MpS\p3npB+Zd$&L#\YQWW&"`]8^$jjbmS4;)C,S=IQH(H;:
8)(FeQPJ?.+.2Up&?t]$J8fYM%3!WPLuWg>`YoKQLH$K3!Bk4/``&T&N9?-!Nf1tf
mDd?>Ru#&Br7Rr3o_XeE0(At@p`4S+,nLmE,[@6lgVLiEd2TQ$11(_*\@ti_pIfHE
VG61q,;sOC%;iGD6nkh&`gSDcRDVXG!^Xd=&Vo&#4*3Ia2Rnq1>n@XC&iXSMAr!b^
^AId(TAWX98Zl[B>rY4U%e\h9c97EXg)Q->.q!uuRMRn+Kck,dgSDdF$%9p<B?hl4
_r#j&*^,[d/%CXUa[\o*6pLm4&^Z`9(a0n9!>,lo-:XZVJK=o6lA,f`:6E@QKB!Mn
.%L!-[i>bNF6C@Op]jG,_@e@6!eYluT74@Y.L*/p2F8Xa&4hP$XB95B>`o=.7]^ff
lD+i_M>XmE@aS[.NOU;H'[+!?YE1qF:CnK+_(lt27GDXbNF*/DoEi\^mZg?m#h\&J
9HJieK6i,L"m[./1p"F-b(W:MkbF3!K%Sh)n%H'-06Edf(6]@HAD0I;(Mbu/U4Kle
Y]'rdS\Dt'HGWo\[LmC)S8a(h.`Yn8`7q.Qk/`]-+cb;0b7\6?VJh8s?8?JiEju+e
(q3BE155UWF(#q(b2\Z0I7D'd93DC08Be&D?Z7)W?t0A<4=Q*K6Ol+%'_0B:`62[$
9_f:_l8$[A,i!Pl'4:<c\^I#:SpTmnRK";u=8Imq2sgcmBs&C+Eims`G)?T.R-2`s
V``RckfO1nn@-6k'GagM2Rk\jBu+ge\/FntTPN/^M1*Jn?u[.KI.H+2najj#9fYC0
+s6q2:lKpr'ZC@B\-Rn@#W+7;jUUoHrUeQPT7-FTb_*h`8`1mGQn5:hTV1`JJ=]\P
:lR_."N;%WV!Ouf![B7IK*@V;["pQ!iP(5HO+b\+o.SdXjcsC=W+1A^(5S?)LcEU[
-UENlmY2iCe:FYEoc[-D[9/HgP6!f/L@pr0Q<<fH6GRWEbZQ6d1!BS"X)Z2o^4Us4
Y:P<Y:rW9Wo?B5k/7I3QqSI]5=WuXXhMSh;%?@^<nh_L)@MaVHKtMeC]gS5d(Oa(6
36Z*\D)Z?@$[$FU3+nOll.2u+5A)OQ_8;)!/ou?<T+?4a4Q>/)5Q:FfD]K6PON7t4
\<W*?N//#;+Z;]0CANUQCq/AAAI`c_=dgafhh69J]WC&(iJ9?.OiNtk6lG0B"eN..
7YLj&5!iM\%kiL05Yc:\?Aj_JXRj)\$!c[Ef,hrE?tkRQ90DmRhD4gVi\f>Y45Oj=
!R$X']RU:^$0!aihc%Qc++<4R$eL$-TD2Ut;4;bZ&7,oVL#s5D#B:NQ+8H$j0<!eD
\%IJO`P07';CnH#Mgu(h^jeW-*Z@Wp+9E`0!mQCK)dN62f(/@u`.tlhDZ`=$gmT1`
RN(nrA'P8,S7$2q0>>>\5(!1o\'54PF/$e3>XNRAa./7]fo">E7#TG7B/q_+a>PDR
HsKM&A=@LjDP+rU'Q`7nZ_&=Wq%@b$Ci^fDmroPUXQ/g[(MLjZ3&bJI12!0Kk=WKp
:nMtjF0:n%JU8hRDD&$jcuu*^loYZ@%ED(Xf*NYY-eNLsc<=s8Qr9m&IlmCEF3Es<
ZdAMDf"jHf0'JW^f@gH,6[%YHCMn$k3U:JCqM&M82fAVo3RMA4G_Y#X^M1lJ0QVir
?sRJe0-&1B?DF.Orl_Fm^%a=kA5<;6\bR`.L4st/?uA0;s-kE9Qa>hDZeV!R_miOO
]Z587^l\/1DVbin3GY]VCV@9([LJ7N*U[L(\YYsX]M<SGh:u5i47pj%h*]bV^[(Dp
/%K`D-itU>U^0N,2Q=lncA6uVLd5q])X%oK<37.c!c)]<+*1)\p]5`Ll;]uALOc_p
RWEI,B-D1SSLW!M8d0$^W_5O?,[bm8^l'6mVmrZ2:MNGH[3R6U-NYKR6pLf3M2M"`
J-^rr'.0B'?L9A*$VFq^=Hg8q<Hd/;a47>$[8\p`=L"F?ZoM2sgMXXjC=[:5%3]+b
KOR;&P+9_'\S2'*<gThVMo=s6l<&S-)f`k!HeWDHR@F(kc;hK-a$Zg8kda_D.HM3D
&WhOn4WjeM+9KfHJ-L>-\R<=0%5SgFf\DWIk2q\MOlPSVeu!Gp;H!Y,=Q<$?+omtr
5$cVI`YrpiYKb>4c0TEN`lnUSb%s$!%i<(;E&A0J"_]\Nn(`7<\DU^'>jFbk;SMg/
.ts/WLk#ar5QY!\JI%'^#W+==)X'&b$`<?LJ-Zi8T]]KU7*6VR+u"_$"KZJE&J+sT
BP%B(ctd509\gEa&L^7:caBL'PX,F??jZo@=PX<.+9Eb6bQqmTf?>k7\gmh+:m?L%
CIJgaK*[:K'ESoO\eRUu"@SoN&^WeHR9_Lh<s1pa-ilK_MBYq&&J0LB"=.At.u8]]
Ld3a@TRgE*]3sp,#`(`C!d_!a7AL>9+9GII8AOLk&-3@SJS%A:"2/;i_:2a&&:pPY
oNWo(8/Xf\"Ju`lJCUbE![8`gc&@/WHHkf.WOj>s!_!FZ\Q0E,15LGd9HbMZX'7jm
6pLmD)$(3=Rb7jCG==b"MA"9WXXGB)&-3B169kTQ[t4mAJ-[tf!ZL8[ZO<YuMLYsH
-(sF);+/PL![9=PJ-;rk"VD:H&SPbZ1sg#M(JNX"!>-_P5gQj4Lm11.6sp?&$!?!j
+s6q2d*)c/T\%C?R(=dL,#FMSSngb,.>%n^^_?h_YdtQ;5QjKJR1[e2YF/ZMF]S]6
TI9h(f8:bM"q_Dt.0Lo(FXr8u#`(`%,G9To1V7&[XpBhK;$)'H'h+o,+s6qc#Y;br
<Y,9D&:nF_5Qe]3G/;[6&J0Mf"S>qLMF\UQ5QmqqW*$i1S2eoN$lNM!7Z=RVA&fMB
;&%Op0Ftk-k*jJZ>]NEjC9+IQ^]!ltgGSAO)A<,`&:k`3cp4d(T[eu,Ld92jkda_M
e7qMWRQZ4Z"RMdIK<0S&rq>s05;t#&D;)A%1X7ttHM?j`V#$q5Lk#be5W&g\TN;S[
W^?nWTICK"F0-ls%J<-mRPo`&"`3)1II31j0(ES`rqbs8c9(K2/$61Abs)$k(*5fM
3d!!f5Q(#'^&IloG2$lCfb7.DiL?^*(LMQ0Xh(3L6pLlCTI'fY1Ublk/i>XL2'N)G
clre[\^hrX]1uN4as'ZJJAq*5Vb\CMh7C"bFk0^(fk-_=eTbR=HK_&Xm$M:CYs86_
__/Xp;H[HJ$af16!>27<!=e\dJmF@nJ-[tU!Bo$Q&[&,LJZ4SnC&uKtf>SP5gq+#&
FO<NO::u>IK8;\_cpJ7dic4"uBhiIEUMg_UJS%\C"2/;r$$?:n+9FP+oN]Q?U.l42
J\2+`$Wns_`u]T/iANfCnDLqo2h_>=*dF?%-U..G1VH5c.J-2[&-3@SJP$5^TN<R.
PnsH5BPI\B>\e(U7/[^KVFr&>J6dNh[I)X[T=)ip]?E1gE5SQ"B!,bk7ujr_]mA@8
CTV0o4S)71m]/Ar![8`gV%O%9]i+GPT*U7'#W*>!RbQ_)Y*Ac3!qde">/7Rbhql*G
p001ZkEob>qXqLSQG<J!HS8^[[;0F4I.L&=-'Uh$6pLmD4okuBVLOTT6P0l\nd%e%
QH)^r7%bh<81e4R[;+gTH%#.ppM(ad3:2FY+h70m9Da2;qsV:6M^uOJLk#beJ-`N,
!]/.bZi0UPDt`M#^Y2@;c.(`u#_32:J-^rrI0l\bYi3k,qsV:,hk$1eqLAPB?_:88
oL]7`Ca'u'+s6q2&0oQ1D-J*lnY`".npqB_L\+LJ6pLlC5Qkgs5Q\CVaOQphLk#be
J-[tR!cuXIV_KL\]C3J?VET.$q+t'e76guD5Qo4U+9>\!3L(6Y&J+sT&:kT^@.(Sg
p2M@lrq^CT%Yg,PLk#beJ-aYgJ-9[Ol)SY5&-3@S!>0#)"Ql>+If&,_05SLY#r^[g
o/6'pWd>p4![8`g;`b!dfW"fVlhj.9"@PKX7%aS_$ST/sIJW3+p;n\SfKort<'a5.
.KUe:![8`gPnRgD!qtfLJ%!s8Hd1DnlRdTU9.mcNFm7>nVO_naMU,*bS17",$:I,^
6pLlY0S.1Z?eiY^+)g2ZNO-S>>HA!ld&DqR#`+!:1^*r'(U3ABql]VYg!_9CS=%7t
Q_eK#\]/mc>=k!.Xb<:gMLYtgJ-`N(!_Y,QP^W&;#<$2<)!fPB6VGIno+qE>&-3BA
1P*+EfH5V@d5Kd!6bg??&r/mk=iBaCs*gGLRV@opQaBNi[NnPh,Q]/4![8`gM$0,M
G$3j:o/lERA'6F09O](1'EJdW!>,lo=qR^6J45t<)DoN>?jR6m;#TRLJ%VGn<GBO9
+a37\f3/`ZjZj,`[17"5oMe9_6pLlCTVW<(EQ&[[br=Oe2r8es<`idaQB">q0*3=?
![:HR!d,6^kF[7<&Y?aA[r.$>qY0Gs)f2a0D7oDYM8r9B.03W[-05^>&J+sT&:n?n
X00%6^&%#pp<"nhfIEr'P+5*j76guD5QjKJ7Ki!+@##77DC:usP-)@a\jhd;eu`02
o[?TSP9s#0Z"(i.j,ZFm?&3JH/iQA;Q:k!76pLlC5QjKjXAc#lp>Uu`g']RH?l_=P
'G:uh!>,kD&Z@42\dDQ6&+?mS:-LLa&qtJZ=i[\Vl72\WJ,YXR\>4NcYU*^U-4pdi
&J+sT80kG5g2#HLcTZ-j4S+N6[FSN<H*jpJ#ZNP`C:mlPAe>RT&Z@mE;Q"on<PWY/
X=ZA=^]=D,A&,mtHHRnLZkH1o_:l81'6]`8/HK&k2AHi*&J+sT&-5R7^%Ks_-_Ge7
7ZSVX4f3n/[KIj`CWfqaM1>l]O$L#`YQSfP]iTk<lcemgF^Wt5DdSXg25$:d%4(Qt
![8`g+s6sO$*Z&ZaH7_GZlW6X:oZ*u+CIh_f[[ESC/"h!5QiPaOS1\9<spSZ+V#MR
e:nDOf&4cWb'*4.g%^W7OsC'4#sFOg!>,kD&SUD32ViIRHfU;Zm,<^A[S8[5Uo!+M
q>$p/f[[WeC/>%$5QiP^OS1\9Ere@JnmqXZQXBZ)55*W=G/kVIf\jSuZVI"!N3#$`
nA,@ao?TYi"$:(*8?j<=Rf\n]MLYtgJ-^rr%Y64?fYS\ShuOp!EV%F6cT/#M`[6dj
@+X'0;>h[]![:HX!bn9J2&EJ=I.2^S^%^CWrV,39FRJnZGFpIl`"FBX:!+^^Rm]^B
6pLlC5QjKJ1]lEJZ]3dfn%H``!F'KUF_QPoX(hdc%d^4HYUU7d&J0L3&P2ehX1<b7
_ft!dB1EtbP`KK[Ls(AX0'M,W_FYKbS*u^ICd'W.0*3=?![8`g`<kn8_[^kA?$Ftm
GM[&gDng_j!m4A?!auM53NuN&Wld^p"I]mQ[*Q:o#Zu?MrV,4#UIPjlpu@De2^h(p
<ip2h=_G/1h7Hn'G3pcr.fiid4r"h6&J+sTB]0);fjtu3mC(d9em!(#STir$L"!"!
l),QSe\6fR;$99P"=bXXp,Q25!R#2_%dYdVggWEnp8mV^$^?s-/HA:r6pLlC5QjKJ
#_>/4fY_U<kpF%4`Z&dhh01N8>DK7R+RQtIg?kq)&J+sTBP[`aT6#,iY`0*EqB]Nb
6!8&\J-^s]#Y_?'p=a:8]DhZmmCMVdZT\'<F)!k_-@9'5#Bii87+<q'&-3Ba6Qkc;
Y"9"'+r"t.n]'.gD;.1N>C<m_CiMqe+T`i1![8`gq$??!n%Nti2:pL2='t?mroD8#
rJa/emD,lEHD+M25QjKJnHbq=cIH49NYjLf#D\['Bp,a>:.T1sQnZ?GN>cBqgU@^*
;h%HUVFIEa+s6q2+9EaK+`P3t#M>;C?>3JGECHWtq8kIl+'A`p%d^J.CI84m5QmMV
J[Eb6\dI)fT75MfgMaiY=J(!38I=%$KQL#n6pLlC5Qi!d5k!RCmBXnfZU'3J=g)/F
)Qt=7S4Fdi^b2l)m1]R5&:l0%+RO6QXoe=6$SV-jFD%%V-C\k\fkd*kVTGM0p"*RL
>-S^E)'o&%![8`g+s6qE-ZI-MLY0Cn"7>*+0=JTCqprFYQJQ$'JR(q3V=PK(&SQUr
dQZjZ.UX?IpgH8HQt,K:(LF?1Vk:[(D5&(hZ,IKI"5A?bG)1YSLk#be5]$f!ldsH8
\DREMs8;KUnA>d?9quGL6Qkd3/lPS26pLlCTU??^qja^fJAo[BdnW"#5YYI#\RcQ9
?[hgicac'tPZ-X0S4,md+s6q2+9E``3s%noIC,Pdc8g(Afk9&:7ibUAL=MG7OEP"J
Y^Q,f2tl!E^P0qNn!Rg[g"NiLQZt(+c9M='_f!6fG'il/7t&>@;TjOZ`>@+?It'QL
^]SG52:b;LL65ueO<K)Pp$/T]SsZEZ4$W]9;o?,Ns8MmsX3+E74TG?NIYl1lSNGSb
1X;As/E:B/[0gW&).kRsKno<O>Ar3,n%NT/br;8;lI77m,^T@T\*_j]T+0IiWMPod
`>2\%7ZSU-h7@aPm+2a[W&9.5cagUo=<;Ph++/#n7WKY)Ldq\=5QjJ?"@Sn[#on0E
EH]>>B@uIHTC0ZfUGf!l)\>P%YR;0S+$SI4^\i+*a:L=eU6'j%nOIrhSTh^IJUE`Y
^]4;fY7H$Th07VTZd*;Mr:!(qe_PT@]sc0Dg\CZ'q^XU2ElfVNm^_N7B:jTajP=RO
X`CaID0sp>@<ULQkLlDMhJ#V6Ysd.-/Z#31^]30A?$BSDB:aDHkF#tSn^jm1LCT0[
5Q:Ff>BJ7]D=c"22ai)[eucVU,FNoNk[?i6%aC5BHKh9nSpTl[l9ZUXo[#u))!AKJ
%QjIIYtdLYA1r06eAd_:,n[(5J[E``$.rEg+gi[!+s6q2+9KfD^e#oEA9^Hra?B(3
':VkFViIpW*SA?WHK)l"hSP/8D;;X@nO*$@b:agcouA/(4DTGW)f)UeVS3$/ql'^7
'Lh`TM_EeA/$A))=Amn0.P.rd.:DVVmlitN)rWdF]^mImUXAf6qsV:+Ljo0]QhJE<
DtnLeFQm8,J,Zue0qE3nko-oL"DhsdE3:L<ed/oHb:L!pH0]C_q51:"at!,-/$EL6
1]RCEgI<-!j97(>Y_85'_$;'h<ioP:jjf(k1cBolcagUpfYN1FgY-GHST/QRJ8gS-
/^^]0hC9?$!(Gch+9E`0![:HN!iMW9WY_fcS8a&rZ8HO6`Aa-,?l'(AkF[6M@@/<J
a`md`p\S&;nM95*7LUGjdTBmMC$UKmDQrQb]/Q1/`O^tm'!!>-g1m0\U5GeIY.aP_
N#OGp''ngO(L:PS;9M]0">"P(%Qj#2RsXS6I1`@:/[EGA4t,^*hgT?^br&S"Wa#T%
cThI)(C;c40OR-mT72S]/I8/#cIGq11A?@/4Le'1-2dL_ki*LXDULSMjcWP&&J+sT
&-3@s47gZP]liJi@up;c`*uVK!bhm_n_W@@Y`gD.nl*%0D9kB>SDbfT-'5LW0"]ak
b:M[B$l2aZeS`"dk)U[k=AESIKF-K]\PJh]);!r/2r<1kFV1jeh0,9[\,+]`Ii3NT
gi5jQK$Mk#'!BIe/[UV3a2nrgqsM(7AkEr8$PE*^;bn;0B9"Uqij].-0o!bY53G^+
rFB#[#r3:9PI*]m1$7WX&rR,T9/e1Do"fl;_b&G)Ub]LXQofZH?$GDuDQo+3Fnt-c
ce?^ZOX!BMHgeX\@EeT(GMd\NfsPTsHf0G[ZLY>a:V\m0k]UdOh0+Naq<P6![W!m^
03>rpn#Wk@o(N3O?UVSj#h4_s\2S]qP`k;]@-JdSjUE=C+XW]MTOXI:'[-f\1kg]N
WB_qM:ZY#1"@PKX6ssaR^`5ao2][2)OZo/]e9#TQiEXe@m,I1B">"$DM'nnaLRA+a
Hqu;S6$0g>qWhID,&I(gnA5Rf!XgPeVk&""*I?qC^)TGO=A"EX9t:*V:R&-7LED!/
a)#_r97^J2-%\"+Pgm$P:V5nlX8J=q,6gIM\(?^sq6Xq>[?f'$qs<1IFn4V85.D8X
3=&_T0qs^hTEn?I?Z3XN]L[J8V3ejH*o[Q9b^M+5"<e^KI_>,:r#b]AQ"5>Wgr8uQ
>AitP@<'&YcTCU.ZPVPE"Yq_i2rN'g++3"m-!kfDDlfFu?T_bqq<4T7]YJ@@^:cbL
Gu$NhZp)PDDV;QLNIY;^n\o?t%6!]/']Sd2$.oh77bH9rDk1GKNgJ.3&SN]sWLn8"
iKGb%N['N.pBO^g`s!$1g`Ni*O#km"Isk\%Mk1\E=-Uch1b3GgoJb;l.^KD:J-^s]
#`+!Yi5C?LJ(f_j&ZGk`9#`U2!pQnZ>H0At<_EBp@>,F?[[gt^lYN`<qJ)XHZctCd
gj6_tZ\i@T]D7lB9Jap-\[dunII<q$1sIl+6uLkYhoE7O=Z\F[S^l'<a8H[7F,BSe
SC,4BHL.oWZLYM>AU]!MQnb:*jQ9kII87TSIEj(QDptVG>X0LJO*d+r--WO,rq^Rn
igc/Em?#pOfpHp7$0fOAbkknq!ZJ2Lg1l```.$IOoOd3eFCU=kk4&&lAir'a`McM#
2Xt(@hbN\;12[S<Am`ssB+Trjof7&E\%uKc1lD"^F3grd>ShXpV6dK$CI84CRm>]j
>[8qc6q,"1-%l[+rV,3/3O'i7-3u4h`&,?DQ^_N:/XN!MM1>kfJ-^s]H&Ik"1u?2m
i4sn1;I]d-/JGDg"Uf/7**B;D"Qg%,fMEj'ZXSJ38oY\tOcP=+=Qnbf*b)B#=:cq5
!fLhLf#D*',nCbr/@p)^iV(GREDStCQI6r/'J@6GZ!7\QcX;=[A<T`8i$U(t+lOK#
q_2No='pC+k+$KfmlntndGp9PhRc9*/Jj)@1%jMBbYgUo7)WT:Z7J@q,oTirqAQ!,
)Y2@+.D`6e$]A[\iC](e*6WAA@1LluG@R_i\Z$8N/9=uVG3nGUeL&P99sVQp*BVhV
UUc\O4Ru$\Ze?1G7O+#g3EK8_Mb=9c8`j4g.?B5m!Z'CEIJ2@75G6YPQJ&Qp8\gXO
:'F'O"@PKX7)6E('%uoMK+@HiR6jeU!bhm_n_OEmPUg.`KDR:Q1nJ$#m55ujG/4=u
oE(?C>bp:INr(O%=d)`D!]F-@11(ciM3&&n=26ktU`n$4rqU3qAfL:a[UFlg`_Dk4
)EE:[iA=ekl!J=;XtF3\U@qo>l(sfcbah0*Z]6YU_mg767V+S/gmN4.'sm<XF2a%`
KJG1eiX+#X>.;_l%3dmXJ]6`<53A_?"=u25kUY79.4#;Q&@EDmCuWeiM*S0KUjgUc
2$pl.na6S2E$9Cg`?SV)E)UcBImktf>3,Zb]aIGGa/pjmOW/;=-gc1/^BfXG#`+!:
Ld2Zb3J@D3rVcKJ?T@=9TTX:gE$9B+2K-p4KeIMk)%WHQQX/0Ln$ouK\-JP^c/duA
ZV!\>30N0clTuTH;3P7@EA&[#k&DTp].3]1;uUb<f([4e=6oUjH(ocB=^'k=,%lK"
Y.cM*<TF:#j@!tJ,5M)J\2l^pDH;3ES0cl2G9Ss2(iI61GAG]?p:GUbdAj7MRb=jp
%l_P[\)dZkAZBiF$i,3gfrE91plAl:`%Z8`f>t)X&MKIC43<3/bpW5P3g#tu<uW@1
fEBVdkEpdl.YS),+^fS7\0(eNO!W9ps5k/>)(K>Ne<fGGQ!"5X5QjJ?"@U$=\E95q
r;Y6%)l;7%W+6n./;X;Z\U[2,*G=60>Mn$SF)JjWF)d2pFKT<=Puj!973j*Q7un_Y
lZ$6POc'jBWJ`d7D@KU\SL\*)B0tM31/+,6/eF9)pZ.N6qL,mUQ?F^pgs(pc0IX\s
rfMd\FVa&"-"?kPF2*^)eMVAJAH*Y[]'.h]]F2FfG%JCYL";U6'l;1U^n8B"%.*RH
(LLMSo5U=d1/kn*5?r.Z?ak*[c;_j><]IVNF>EaQ57.^!kN3dFn&*5W2.qe+cc4$0
]ZP'^,>#]A14j[ro]VF&<uW@1fEA_Qplq64l9ahuC+S/agk,=VJ[TFMqP\HdWZ9Tq
,&]J50#ZjJ;]-/Y!>,kD&bphW7'(OI?Mmus/hi<ie<iL9f=G)a56(P%_]9RQ>$P$t
,r0P+AS$ZWb7Z<XW0=?ic8n-enPW"3jl;CU7hsWck*4l6bPY)/r47DJIT[[=C;$Z$
o4]YgqWb-Y#faCAZ:#mX</DsgXHr!TK(uX]ob-`3H/70A]C50SNa]V"-OfsZ3)3<)
If&Nq,7HBsech*)Y/&9%,SIQW!jJlBqT;;EApu.Va)r5c@9e2:S&/E1k2$`AfSMEm
DUHb)caMYQgW]JK+"jLWO/@jTE(I($b$<IN2T5ifV1_qaRIbGbUI*Oh^YOFr>`^C!
Q-NN=I:$*rM"*,k#plEq0#Y\hE<3&ORlArZKGuc"NU(lKKbn@$96)2ij,Q5!>.@8`
A,.D<+6G]G2@a(?&SN]sWLn7..c$34FkeM.9!"aYAT9*V/XuXtM4EJ:\%;.m.k,D*
IA+ELs8!K3&J+sT&-3@kS\RrYh;nUnG6@Wg$Ro`=#a@E2_<lHCPudJ-N]Ps91#D4*
G@G25nGAPVDRg$GW=q'bldi25@-,=17hf4N3C+Up\Z4Ki2dW*i=an$'M.2;Nq2+;S
U>E2E7-HjtJ?d+WcNQjsYb:!AbAl<eZ1MNT,Q]UL?hP0/R/5HYF',27UIKO3oTO@3
ZL$_8HFIOg\Ki`1D@)cQ"db*On0dZsMe*[UihYXo-,*0kZHCg`[bZ8=RHu*>0n0;t
Z.d<VilE]oj3IlfAJ[&$TVXTh!fMsn&VgJWh!_b21At"S^iI-D]]Y6=Sa0$6q4]iM
RtL!A\HKeJ=t5)l>@<kDceBT!k)n:k8kdOn%3:Re_n&rAq24R'"h#6k*>\_g&-3@S
Jc#WV!^dNgHi[gLQdh.4&4gZ+W(*Ncl<qk8,3BO%-Z7>V=2]qIIu&5O=o4ILSQLRR
-%Zu=DQB7fCMk2k3O`R<%??cpK%(#D,4H7]eqV,QOs!G#Jr+1-7(TkgL?#i%=G0i/
(9bKdpYJ"+Yhs&@g.ss3Zp=iR`68t_KTCJBi%=)FWl\n)/Q=(k=KVfC?<F:;E;o[r
B<jUoOV'#[CUfN51_tYLcafJO=<9`;2Z3'^%mDO/&",V0q@mK!k"/+Z(*o].+s6q2
+9Eb6GQ`!!gj].fc)hr=@+ggbCK34s!bhm_Tq&hi-brijHhZqlno@hJW:\NGce0-:
(ADZNLN-Nf6n=*Z/IA5$cIGn0ZBc5DECkfrGHN?CDF5R4'!R)Rka2X3J-^s]#W+.7
f)B3_,jSpF(8k&I$)AToe[B[#:MVMVo?]i8g!)J5Cgm.4VL!DO^q'fkIN;YT+S5>1
/7FZQc8(6e`r'+LGMRCjW?/\n?1=pHCNcuZFBesK73Lu=Y,29Oq)/$Uj@fnFieSiW
Rk?&+j1=4Ip9PU?NY`'oo>`*mi[cq?&-3@S!>,loRLsM$:lR_%?+Y8;K#B(fQ9a/T
?#=pIFgZst`Qb`s6Ol,P8Y6ikMus7maRjJl).te81hC8\hiB.VGf&m]o?PQget?;m
h0$t24gl#!32+/j4HiW,7%fYKUj^P=<5@Xf]:15;k<^je+Xuq',uO3LI+b;X`V+!U
Cb\7;/cm4>![8`gq$B1[kbI"Wj+?J3d9r5S9-EW;Y-u#BCEal&,#C:N[*Q:o$J<Ks
[s/>pYf.J/LBr]d#`+!:j<K1DC;UK>1`%Ig7ZJIV0:VYo&qRCl]12(?WYGOH&:m:q
OS1]dU]p+E2r<bN4qV5+g`uo)/if11!>,kD&J,!76!\Fcm+f.X&XPh`[KP"gltY9:
[3br!+9IfA8GepXX+4bV/0Yh$Hkt?]/:0oU/1-=eJiEoXqA')D&-3@SJ_CcVCI-ZX
CTV/`Y.:F?[5MgXJJR*Og4<NJ>V%&ip"*P`MQjJ1FONsNg#g=N5Q0YENsIfR(rUGF
;bLTA*L;T"<W;j\YHQ,`2.dq4RYN2@%Qs5GA'SjI;e+AV_@&$LO<HuM+B>JG^3]&s
2b(QLp;gLt/mZ&Q'JQRiVi151H]l-<g1/7)8s3Ckf[o69FS=7h//79R_?qe-XHn7P
,'%H4B9p8Xm'4TYCnbBM$W`d:0_KLie-0>L51cZ=eC^l2'ik+@m'=h*0";nTE<<SC
G!\?cs8!K3&J+sT&-3@kS\U.:^?GU#Fp#k7$Ro`=#W1['`i\JD*IdeBOc)*VYOOgR
m*hWb0>7!U[+AW2q;]XO^O.k[kg0NZRd1Gr3/Mh6EQ?/&B,`jL^Ufq)A+sF,nDXB#
3>#Kgo4s;r#7_^j\TNLPT3]t<ZMIhnIbf2%D35K]^/#PNFAZ1hat6SkO$E[BF6&WB
MO`j&o\4<!jVCRurUeQ78"D\`MV`XA*FE^$KF*bSUlc&1=1"Qle*+unM%cYN?[gZa
i0iYbO%%6iacQ3V='#drKbn(Zhe(dj4Qi5UAhAgu"no"#^9Z.]7k4qO];eII+9E`0
![:GO!jB<2R]Wm<.^noj/).,.^06RM[-0DH>:.Lc`MsHLXgXZOH,0Y#fO9OUetA<t
(0SSGGkH-O)]W\V47FkA7[Yf#F0/6;Z23BHKXmFGI`7AP^?Z_V]O=pjqXs/Ud:jrX
>u?;S$=i>=@a),`V(<.AgLasflf!U@[`p_bbaa3c8sJU-ID"[->O9#ocLWaq.LBVn
QVBBk`6LL:9Q*@2qtT34[j@>B_Y2i5D`.tMT)H\LF,YV:ZVE2Q8LX?,gMbiL]C'F3
ST\2QnnAT2IEpAC^_3*.Yhcer\@5fSc4a7heu7":fEQ#r6NfeB"@PKXC-pj\\)-\Y
B$U6b/2O#">68LDG3/FXG%R1W-N!D\5J>h0VOMIl<>@-=\))FH`U8[fPr=baNAfM3
0AX_?2"aJKl3#&"/[sN`a-\m_jHJnP\cpj%iJ&;QHhZr>$eU&rQ[-q\14:-mC'iNZ
h72X>Hi,?EF3QRDTkl"qRqJ=<N+J:dhj7]!\\IRF^fY^+7IBWc+#g&"'M>!Gp6k<P
_[bOr83Ie,\(u43]B#,JCmek#.9&.SZ..)[pBDa?EkV#*j%A-_.IRt`2etJe)`a9g
T4aa@-?=$1U8OT/8hS&]Y)kDsJ-^s]#`(b=#e^'&]DhhY2\2s8Q+!oc-;U4<p)/X*
=4n=Q=E)u.Vi>T*kpCn^gU:tba'S;1\.<X6K]K4&OW,!)$ST/3jK+-a2:l(H%d!Z/
rRb8!UNu$n2qiQ?SKk"gi?INf3RN0=XVYiZ`>62Sq!mAh[qq8cGN=lV7_%."\$ago
4$)Z*UEVY4O'IdlaN_\`gj5p5N#PS`*BJ<3r<[AeDOt4b]6E_bM=5-%Qna`07R_CB
0o$iXIei)lR=73efYE49ieoIM<a'46#Srr&Rg\ZU_k9et5/&'SX!Md%WMk7Bp(;GW
q8/O\PCDSnPIsJ8aK:(Yn$^tgOV8fKf7S.bh3@Lnpu$cLkKOi(CO1ZGs,&>0(qDYk
OgAZrhmhh.:>2jV4+E60dtN'd-2m&&O!83no%/V+7iZM:jQ>Tj>^,D4MeNjtlIF(a
US#0e^3^Q,*V.1a3JW%Wh)BER\4='tj"A9(fZ!0F1hfk=3HM:OCR1#7Fhj#$iBgel
4\H[f3?dh:CU(hoM`Q%J(qJ9`;,SLX:WiEU7:"MNGFbqT]m,A$\Dn(f$G=_P$PiTo
F%_Zcc@[HaSe]!=f3a$`ruJp;UnkauNcA@ugMajJc.<D-rOqZ+C1aoTocrjFcI+Tj
)Q8C@"X4J@:hS4ck.mk-6HUq_+s6q2+9L(<^cY3fIpR0;-*(*]$`hAQ6Lj%8EKN/5
Yu04qC%EQW8I.f>6ju,7A>Yg*JA(Ecqk@5*R3c;^p[>ls7aC,JQT=B5ZSM>tIrGhT
M@a`-S7q?$kOucR61R8?r8ZOA/oF4PJ,[!^PB!=$^+")'+2<d`6?o&MqWV>%dapYV
gs_0qk'8.1SY[`$"<VTu!Kj]Bq)Q.tii.iQb,iAWqOskmipih.:5W<7Z3X<_pd+Q#
2eThrkK5]*+K,f2j:EuQflleLR6#D='WRA0`<>Q%hgb+@(I='X53JGWHlo;RH-D(G
qEVe-JB[="4Eti+JcPWF#T-Z*='3434laPAo4%">Dnku,SXX<R!dd@aqtB].GZdjX
h40,(hFHn5Z]5i=>Z8!2f,9^)Qqg8dS=mX0YWsTsMdPOsM>?jtJ1\bn?8'/JIa/qn
r[`6;$LssQ\:A/&fKDkK`2[$j/E-gKkJiDo6tfI?a^=9#lCitSnh56t`luKbhW&O>
\_GDN,3!0+3N:B_ANBFK>DDb/;eddFkEHlP"4[sekFR%'mqepYl!"4te4Zcg+s6q2
+9E``I0'ZTrdRBs.$[;QJS>t]CpVAEOdf!KE^c[,aT]i2(^)AlF2S4K,5Be;"TaNP
6-LJ^6ULE)G=O;+PH8Wf@uu[`$41^*aMJ%?7%8/sb<?-noRSiBlr`/CY$JY//ip#i
GNG)kqL(MQo^G29SL:"RU>Laa+<auMQXFP*nA>d3=_F;Umit(8.4uYREsQ/A#3WtG
c,]JPYl^)sgMT*fm@nXuD$2/%Cqf`-IQR:r;X058+h'Sg#YF2kR1Y$)7BATF:7ls4
STaRP\F\!-rAHrc88bT2h]FCgN8NkMS3fOJ@Bg:)9;!BtbWbpj5"hkt]=F6A>l5X^
F#j1_6tB1^ACD;0nrOEalpJRS_Ch&\hmqporaOK\(uJR!9:a&i=fr3=H!s(WMZ<cN
b3`[fIolQM^kMY:r!h"kp4[kH='jlNV>OVb=B3>n3!VXDVUBN\WA-5+%0=YiO8:Q0
j"?;V6MTK)_B5WXCoNb!q*[IN6pLlCT_\dTrUa%gIl2+t9'$Y@$eR.n.TOQEr+TAI
d#@1HJ&4H3WNI@O3JKBrQUfcL_FP"8Q76/,GC_aPrp\6"#9Dn"irYX<&64r40k*Q%
Tm2%uWeCRlYfOh<&C\k%2i'7>^\6AsrBB"q8Q`!sr5KE<[Zn\h8;`>G@%kN%\`&8^
q@=?KIcHG]_MsoQ6/8f-2Y'<%/u?j<+/ghO_4TqrnUrE.E)5A$O$.l_Y\;$T\6a_`
P(:M?)@LFB?bXE<j18E/h$?']mdYt\)HO@q-RBtto("#sg`0F'"p%p8]6IJ-kFOL,
MI!PtI$4\LZ$SA7E@dth:gk6sb]EXu[L<%>+nB(+!\n[e5&jB(%kj!NWKb0@Zuq\(
T6&phC+;C0PSumkeI\s<BBD\0<u8o&UQFqh.JlJ^9*M&;+s6q2+9E`0!rjKqlPokj
k)+]hjj:2?"Hin((n]_)l_8giXWliLRj$+/Tl.SY-l]nRQS6;]/9tL9Y%ZscBD-JX
2*!GopAFO.p\S1ud]BIo55T02+7Her'\m!Mg6T:)1>Bdd5d1U8"mkj,5O[>8if)$!
gZ3bN^ADeTGERJF\<85L4NGENYQuHNo-NOA;Ec^@&cB/U-DaW*N;"Kp%P68U0"YrJ
+ht3b[r/oU\H3Ns0msLi(d#&E\%oR?5@1/JX1ZrnZ#!p`%bAHm++<<Y8kS:I(DSmp
:gDYJA9@kP5QFAD5ubXc_ChmngW2NjNYf<>`V>`D@'Lcb[<FcPQt)Z(NLQ0ea&;o>
_K:gJJ9:m2IJl9<d\]qA0%8BSDLVBM.5dB^F%VFcJPsErYrmh@DH\CXo>WE^_(C<F
JLn%%?:s;m!>,kD&J0NY'-J\2s7[3)V,aQsd<*i3fAOQZ_VEHG1X$CVI99E%pVWX_
pVVM:l,,bGpVVC&g^f&%U^pM?g^f&$g^ihR8KZ_;F$ImPbPbhr$D67^)TGUahmeF'
'=&d"g+1AE<!Kr(:EcF%.q!(Poe1#D>[-?CL:&2pR#@jb1m/'k_:9>PD*26d$Eh+N
'X6Q/K!dQj*eOI4OrI1&6Nf3EQl(^Ij*)qp`qtj%So"O0E@nD.`Y1Xa8>V3f,QZ*d
p;IhT4A1c7-g/ZuQWc>aXQX/sM`_&$T=F'&RD8?<$G9Ik2>f(K4lU&KSLY3'=6u@j
j'.Oo7EG(`A'gl7R5qcZJk<M$/EQ?#g&e^I^J!J;)Z5fm3EK8_9>n?eiI'MqYViq+
e:\*`J-^s]#im-oE"i537^V:S^KUO7hg/**#@&gJ,F=ldS[nWu^!1rSUdSUbcj'\)
`WrpYc4`uA7V.(:HPo%+HLtm#Cge-b3:8\`2)PYGjpNB-#ms+1i/dBJSX!02"dTr:
nV!0pQNi7+;Hu>ur:8%FY6[0?BH^fd%>)'V(^aikG:@[Sq[goh^Bk)I?cLA7iE"3P
;@o8?V2V<WTbIXrZ,[oTal\o>nTDn.=+C/<8'ddm;/4q2c(pD<\X#qFLcA^eiO5;A
h"oI59\]e0=CCU/l`R0#G.I;.ShnEF?*e!fP6>^,HZk`]G4G;Ym1Z"IQ[n%$bjAmh
Iok/9Ybh8'de?ojmMe?dVUBN\WA-5+bdq!#E=(8q09bs`J-^s]#`(`o#iP9ns8@`[
#,>:2E^'u$F$InC9)=3+1%B2Eo&Y=LrUnbjl,+,J\K=4:mY?6=IB`S0IMf0LIYbe/
oKgjeI[Dp[qa&;W:KX28N1o7g#Zn*$@4l'X<=X:qpK)Dt]VL'DDPCJ@:8/g9=AfFq
K[:i=cE.E;QX92DErJ?-0gCm`Yf,KQM$96BR=a?Xo[#u(nOkOKe@RBoDFo:$fO>/7
kFHhp2?B:6)Du8ohhQFd.C]TfM]FFgLfH"S,jmbjMP(944s?N82.6D2D(i39,2Rpr
;CK^?[p8'?&3KD1c+)Eh]#'3uq(>]\DBIkLq&S8;kpK-Z?s.,KH>j6^9[W$a5Q3XC
-l-"[TB$%uOV$Vj1WPhBVN`IN1]-sOU_1dSEkW^T:oSRn-Q+QH!Z1Ac9#A`+AX6_C
8I>-5g*K90*Wfc\,PD`5$Wlb*luMF:4_Kck]4T%WL?%fNXk5e[4Ehu1LVu>OP\*fk
+,g)'"i2)=V,L0W!uq4TfiMo<jmTM)\gkr@m_;ZcWOm[l699&CGf(?tYf7Gsl=>Gt
ohm93#`+!:Lk#b1T)c`k_$)I*9'$X-GYo<NKl=mK_D[4IHo6]Wq2SOf+-D-_.IA6?
L(,*QTLskUi[b@;?3%3A/$?in%M;SAjt(U,/D7nOWo8=:OeFrWjEOelKU3uehlp-5
YeU<hm7@EsAT@B4N$0S\=mSL<Z9BZ-!?!u)O)lKU!g[]cW3Y1gGnJ*5;Tosld7#,%
#m#ji/@<HH";p-LFS*sNHe3N9j7`Dh'2M">8hWMVYJ'X%jA;f#Ud"RnErKLm+p+(=
Z'^<WOHddkTD_kK&X"F9`\h<lDS0D[?M_o1`"Xk]8@Yn`g<Y43=C$2\Q*tS5)qP?]
b5>&tm:'qVQag])p$:dJ1=.ZA`*<OL,3X8C;2ALq]h.Bll8?c*QN0ZuNkl'/kajs!
PZ)s[>-8[(Y^'YDcrsbO,k[;k..h_;\7Z[#(bmo,N&/cKpH($2fZ/oS\.q)l9>9e&
J!]uR<I6sn^o,]S+#:D/,q!n(q7P"i>&p$Y);U`Xjt<aG$^$gqKfV0e:c.o:R<ZB/
SaM++Cai/dPcC!="@PKX6pLmPH3.sqCJLgqEs"73H(F6H[kUY)#q9qr/bl?:E&D:e
1?VtW:,iu*/r[F-4cXNJ4*/9Wh[?.,c>m]<X]0?DCO^herIqtV)l160i8@"*<`Wjm
[C>%BgRRI^-`5+iRqkdk2TV4bW5s],C$)LH`jh:p>@Z04MA5Z;5Pa@RiuI:oIfn4l
Q.G1^%ICe&hD=?SS9Om98jAks2])EO/$$!OS$R4+Rh+dK=U.lA36Ro(QP8Lf5aZm!
;,U!K_;ML1XIZ:JcI9IKa=:CC]<'0GCo$/skaloMIa#Ka0ddT^CG$NFSlW1AQh,Ed
>snIj6@Y?dCJ/"Ym;oG5!]L#AV(WtmS"?$?Lk#beJ-^rr+M_A!Tn1j:erm7Ah^JgR
@%A%R$We.SZ6\BIW_Y^\$g%$Zrrehqer+>\9j:.V5QmN(J[Eb6-7`K[!l)b04r:?%
,1I70(#`)"&J+sT&-3C4!Yur;J1\`T-tM!6gjDA.Y*!;#909B$DHU2&"0pX$%<=&7
U*B^`cnl$(IEpAK^q-ING1BSoH$9;gEt$.o">CWAgn&l\3Ua6dp8@kTJ5&[1q*dOO
6pLlC+I`@0H#OkF?*7A6Ph@X%.j'>L"1rsR[']eAUq.[1k+]Ka;g3;#mC`&9o<,PS
NJ5YZ"I_B&[*Q:o$J8-=rR>(_]7MY,O$)uh\Hm:gF-hD/)k@=nJ-^s]#`+!Yi7;X"
(X1"9CrVX:<'(.q#BmN@R9C4(&J0NY&4l\gX/gbn@H6a^dnV\8Fj@UAn?slAp;You
`uTBra"'G#!F#jnPna<3&-3@S!V;mZDFkaf;)57JRl3T26NUs,FuAWTRM#W5&:phm
8GepXX+5=#-Ms`aDTNmu<nE$_2tjeiYfs5=A0!^Q0TK.r,[`-rVm7Kh![8`g,%*Ug
.?Q?1dEG6rV:lMP40Ybkcd\*`Lk#b1LHsSV>[7O"nDV95Lig+\OjS/8ot(Be]j%aG
s4.->akR%dWL')"@*9joEZuV-+s6q2nG`XRSpPAPk*p:JjmUunR)2`g!bhm_q7=SQ
XbS!If_43Ps%F2ok.1?RX3IaS>1%Go9SFpFn5@3,M<UAcEU1ga/Bt[Y^4`7cVq'Q`
YeCP&!H,#:n)h@LWiMRm$T:qM>NaS`h$uO%HCT05D7A3\Rr<1^D:Gdoh]a0EFX3(B
3EK8_bF@9]2r2tRL4^B8?$W[64rb3/kDMLQ6JeMV$.pLQg*ZqG+9E`0!i6Q<m7`fh
R4r&97I*=,hP,#p!bhm_Tj7MBfW\dJJC0p3hO,6[+Wbj]Bd[DYR8Zj@-(_ds^G!:m
;Emm7AVEU4(h%dXYt)WE@sd[X\(u&E*Ho@58,3)B[C=-oCY295^#[etjlHi+8AhO8
HdYJ5q<bN63m7Ntit$M4jd5B6qsX8pN=n(T>ISKnm'4Ubem!([oB@>/&:sZi8GepX
X+1?ebN576`Ynb-(is.hSG@[;%e*-TXKotuG10/E<CBae[N^)K/-7"<![8`ghP,]-
Nu-$*"BH5ZoE<SPluH=G&AYZSB:aCgk+-^&J!aot)fNBo2^05cgi9kn)LZu)kg?id
7N6VGk]Y]tB386e>Al[:p=a;!YJ'X%C``\9Td+bEf6,\Nf9TTT.;r)F3-??Gn%JI%
05O!eXE`.!B2:0g(L;,[?Ot`A>Ah!j[iP&(>6I?ep&rf-kNX[-s7th"s0aJ#*+ZPl
o72_1J<Ysi!k)?S.OP9A+9E`0!rl&(n\l=="93B$`n=gZ/LE#+,S7sc\GN-tT7-F$
/\Uf)2K\.ZDf#sF%lr\^)`;Ap^&IloAZ\ZGl7(m8lR1^SQ=g!OK+Ba)GO!]"56(P%
qs_K6D8mH+Cf#8;J:7%62sp.U+1K,t4"QR;UBmU,GOOCCPrGLD!R#qN,lRT4Ze&N1
:%#q#PeKSZ%Kt3DkNXO)7ueSR+0)iZjJDq[#$C'6SZPPO0"Ha8D+h[A_PPI#+9E`0
![?!A!#@3*`gAJjI"90?)760d#c&Kn`B/,8iJ7;M(A!ljRr19:#Zk5>O5MpDjH2sP
Z`!ZE4ORJMBPmu)^D*;]bOML%HHNI\m]t"ghYJ,4*.77l??!XJ_@+r"A&kf8o:7.7
1C%DShK\&i>A9q!HsMQ\OHK_t7[2S<S'>/PDnc&0OB(0^+9FDIOS1\9Ere@JnmqXZ
QX;ijgkV<D0R3*F/53]fI.uH@NJH3YcTbdaU?N;p=_P2d![8`g+s6rd#qW^TZMsmc
GM[VcQ<@gfeE']'Hie!eG+g5;K]ee>0)rfIPuh8u]C#7>:UfAF5<d90QC&pFSp7!C
p"!@@n])a+7j!0?`T9,CSE#6<14OE"BrB5*_2j-L#PrgN4**;^Ep;YK:X7[@rUnch
2rTB!3liqcm'=hig->8[;[jn\l`Rj3p4j`d$<W624aQbi03iH2%OjubEXXm9jo]\M
8g5AZoc]Fj3EL8&b8X\-69Hek8IFHV$74dG!>,kD&J0N5,I$0b.iRiE=LV=5@>2^:
82W=KOEP"J.U]oCja;t<[P5^!+VBDEO\"sdQ7X@j3+1TVgU:tt>gbL]>gnU6UAGR2
l%^@0n<V3n7j[&Z>]P[nPC(M.a4QemSscPbnVW.9i.;?B>_5=t;?\VSaM^ocr:8#u
;?*1_^_0?5d75;OCE1Y]l`=6#ZloJp:`BIMT5uk+Y[HB`hbclajT>i(_Qr*O$i12,
iM6hBc$)hsfR.5:?N`b^"@PKX8gAkOlIAsCoh40c%[:]u+H1m"c@JEKYrp=GqsNd:
-k&6cl7blV0L'`3"VqBUrO#)@m]aS=IQf/H'6,sSm+=_l,[PT&-5T91bqtW$]C!%0
=g#<t)W.IlrVLqWE&^BV?m5dg.=(gX[h$),hk^T\b2O2]]o$TE4QR6\6pG99/4$F@
RR]pP7%j5VdQZjZ,%/5RTI*o+E)kS1_[WqC[;+77GRN*9HZs8WY$KV`Zl9X^Bo+:R
#`+!:Lk#bA'>UWe]'T7T-YDPm<](2Z*S?(SRA7nee(e>#\:CpF_meNPlWoH:ra5b<
D,g^HE'ZrQk"bTD%'`F/neOiRaLI]nGoq@r+m[jiX7bc.b6ACoPUR[9^uf]:0.((H
!FBE0F_pjBi>KgZVK2DUT7H=XViU;eXgd/%/EroT![:Hf!bn9JFVD!P_)6r9jb,L0
X<[i$=CbF8#`+!:Ld4TV&?L&\;Utc(V]FED*en&l\\XG2[cX0.mdVJZN0,O+9+'gm
i`_;+SNPuPKm:cm[g^efr68E^/B,!lk*u7Z6\W$2ZOG,t^\sH)3#.JD>tDb/L;9Fk
-*t$s;T^@p0p^U6_[Sf>'EVB."@SpV"O]Ksl7-2"iF1"9Om32R:i6UNkHqBNjgM(-
+s6q2+9E`@[1Qf+:=e]@rD*?!<iR0kZidqeZbQM9b@[/R(4X#:pC.GP.=mb?"rmab
Obm3c(9ngQna<mDIbqIJ_)_Jddi/mQX-GTq?irWkHK)l"5"JXT>%dj1kP)eSPM4,+
@"84TG;$2*l5jr`&Xf?r!G20GJr\q+YcNTf+4`GalC*kALd:>6Uj^P=<P[UgEoD]g
-;p9hBp,aX*"S>.mFs#N.:oC[CakU57g)4F"@PKXne5D&4-mTjc->$X5P[t:82U[K
*SA?c,iBFkn;/b;dTq(Qjla1[$3]s+8ZWTKZn>Z_@*'ZKI[Xo@H2O,5XK1'K6O1B@
)ZMqi`"RTK/oJ:'H*=jJ3nn;>ICsn]o6-<qP(4kJeCIiBm4H@e\K4e`^c`S\#g5CD
M4'T(^u@+DO=KAq1PP5'dn]KbA5GHR7l[JDg*ZqG:`TUOT6#,iYQPeNc9n;D_c-]G
&0W&-!>,kD&J0N5,sX.+gcHU,pgGg<)RhTS*[d%m?l(JSn0B\#_3X5RF&%2jEJGCe
CTkG<U5LYpqcL92;>K=??[@VY40`,?2V/uDibGB,YJ&Mj7EZ<<`'ZQ]kbG7a[r-J\
8J87`efdD8,aQ:6)>E<UOp!<eYkkZ,&.t!q=E9h-MZpREc9(Ygh]a0Es!*X!3S,MZ
/5b\9[r.`s$f7KRo[?Soj,>ejd,s<S=XHLn+0r\ZJ>K=k+9E`0![<^kJGG$44RdmW
J,fIrmUAKum:mmJBa8hODW"jE&kGFg70&'ap!m-u)/#JuK.p"UbqrjQei,4hN5$4)
2-0S:T7=M_*R"Bq91]2n=IJsS,QW8KH0>!2<('p0Kpor->-,!*oI4+]IZ&^^PYWFh
F0;YIQ9YJP#KrUmgr)6]j2[3>_RPAbb0<l-[KLCqPa"Z@6pLlC5QpWkfOgUim,!*X
oatMMfi4slJM79X2jO]?C]l43\hA,66eZ4KNP,.*hnFNVXsX*QD#oRl1#i3)dndFn
GMKGpT=[-3!`M13[*Q:o$J7%.+nq`#7ZR;LX;/p.R$Gn-OFYTPX)/F[!>,kD&P,EB
\WY1-bdU&S]%WB1%=tkg];3"k^%>4k(/'0)Q74)-rqYa6AbV9R%e9-ePKGbZI0`q!
,@`k`+[25p@Ypgb`/U.7<k(J'H0(=J3&8MoF80grJ:d*mOpHk/I0l]tcIGq1Q8/]2
LJ9',%jbWLHUFfU&J+sT&:rt>JEXAA/#p!4CO[qb%d`cZnBEoLZr*Sf)1j^k$jO3S
'6/92q;r'sS)cNfRsCtVD86&C7We!+$"F7De0,ETR@mO_X6S?BA([o%&J0LS&kMni
CXN9Mq$9ZiT4*Hlb!mi]>;eMW'EJdW!>,kD:LK5Hp@(_Tgj%k=[eoL)Mb4EbU`J+<
Y\RuG"@PKXW^7iqF0=p4p>Uu`[aeD_/LuY+[*qe9UZM#hX_lh$'nMKtXU(O+Mgu(h
J-^s]O'$c-p"0*&:A3Ia:D'QLJ[>Nk)KnhLM1>kf5ZJ)cIEpAC^_5Ud%QEOed1WZ`
\Z\th#`+!:Ld2=pYj]='g,7Jej6%Mi?Dpch#c&KneZNP"8H_FH"KFg3m;oG5!k-`1
s829"ISo?=q$J./J1X/Za$`/q6pLlCTK%K)%QM6/^q&H^/$*C0T#D'c8(@m@*S=Ao
@9"QS+s6qE,*;LY=*"E>pYUH>_R*F61hi*`D19\`a&r64m>GQ%HX$V10,biB!>,kD
&J0MV#k[Q@gFg,)1)i&`OS.nhX/%Mn<#l$S#BnX3<OIX5#`(b5#c)moePs<sm;BJr
Q:jZ!oueUg;^#(O&J+sT&-3BA.KLaF%NIITLg/83ed\`2J3$_sG$nClY,Z1J&-3@k
Ma6"ZS-3Y2QrQZ[6pLlC5Qk7#JU[Rof``0s@-=/3^)_[ti@X62S%tGh*S<6#/uo@(
+9EaKMEonY>g3F'&ViGjl;TUO0J:9s^%@KDJ,fJQ^o"[HPZ\,W5QjJ?"KG,QkbF3I
F3Zedc9D,A@pMg*g(?k;YcD'Ue<1)nJ-],05hbC+9a0nEacl,[]C30KGMKI!Z[M>Z
#Ark9f=!SSg6@gd.?io0-;i/S&J+sT&-3@kS\T6c*G9#TEJBNKdD(22dL.O;`<=U!
lmcmL'o7AGLd6q+Uj^P=<59icq!lBHmIo:Q\'CO+>7d8;-Vh%<Dnam755='3,,t9i
3hn)q<DJrN5QjJ?"@PKXrh$tt-_4eGS8sLXI.GC&ie]#i9+;3'*SAoHCMHHE6pLmT
66PZ:Y-%j"f3a$8%5ukSIfB.Ule&J;Yt013!sT2'd>I`1Z]ZR7>7!HX'`emX!>,kD
ZVsX_eI0tB:,p&t=YZlrJ[>Nkg@\,kM1>kf5]m@.IEpAC^u?PcfO9Qg9Jaq(7ilrO
mC(be)%(TDFdF+ur:0LIZd7?AZd"fhTD"$CCg(;j0*3=?![8`gf`]S_o1[&Ept0);
orc6d8%$m7"O[eH)RD)s>6I>Z"<)nXg?2^H"mgpZ?>(mlF6K<Qg2te<Qf7JfB:g%b
qqlhr?,,N,QS)Q!a3ssKJ5&[1q*dOO6pLlC+Ig0WkFV!l2t=2A?qs>%,ER(V=1b''
,nU[h&Z?1j[*Q:o$J7iiH,Os.]@gecq=S0a%m+CI(q]P!HgQkYr\.*%TMIk,Q@gTM
eK!4^kc'LHLk#beJ-_P4_O9M,n=!fH*MqI%83=&V?-h#`#`+!:</3`mk?M9rm-h^h
DL:`TLUXW;Sc2AGmH!Hd,TSCXT*/u0Um+XX6pLlC5Qm5V>]Rq4f!fR)+'`gD^k'Uq
['rm<U`J)F8gdT;#`+!:1a7LXcagUo=?(^&h02?(VT0a)b^u+EPJAZkrjH[u<eO*I
[N^)K/-7"<![8`gG5:6d>H_AHm%At@ZHFl49LNVd+RQtIL0[_V+s6q2:_a%GT6#,k
Yi2[urUsG75CU9&>\p[aXBiG]iD;u#'!N,0;dg7L!>,kD&[8==]#o?mltQ@c^V='"
jcq#f6NUs,FuAWTRM#W5&:phm8Geom1'4m6B:i"W"De,Rm1KF3&-3@SJJ86A%NT:I
HM"Fip=[Kh\`T=p-'bl9!bhm_Q+!U]+s6q2:hp,HT6#,kYdb/"J,fIr\X`KXS'Us'
l/T6cSTRt;GMRBljsL160g\k_![8`g,1+15$l_+Kp=s^ble]=%esbtX*(s"$5OH7h
-Cn$Z+s6q2:dkG"T6#,iY`gG1p?kJQoh&D;rUk$si5,-]hgbMoLW_9YS/lk4JJI.+
J?9*L$B'E?Lk#c<5QX_EootM)_,>K)^AdtE)`MZ)?^I=Mc!gXT]C'F3T72(o,ZMBS
:-5\\?-h#`#`+!:</3`mk?M9rlok*uA&fU6S9=8Tfk-ao7O'B;!g`Jo!tX&37iuTo
5QAC@4S-d.duf/4)k@=nJ-^s]#ddD0]L_2bcOcQi#t(aoXo'XM9.dPNdUDOD&qMa@
X&=)?7Kc+E"I^lm&C@mg#O<jI=U]`;Kbq1'G1jh]:7Q"<++Lp>YZPM*BCk,@0D]N:
ZfNM?fQ,*5S-Xq$#`(`=-4nseo.emCkFM"k>Aqc1=So-e5Q\Ad+B=C,Ld7.Ocn#;N
(0K.Ole8bI&UB`lLT@Vm\iooRU\<`/5C1CphgMsc^%B`a".+Ni)k@=nJ-^s]#ddt@
s8Mo!/\h5SH.Qe\rUncZ`>)Hj_1Zpq+s6q2+9M3Y:fe%k++O2s479VRIJDcVM<DUk
&kgmHiPTN$Br4Ha?HQ"LfMX+HNsLPl#`+!:1aI&'STjr1VfRo8\`K,8@`4)Xh:`VF
&J+sT&:m:u:fd\@fmW\XQZh(sVqL*k5Fsmg[VadQ)JcE_rVQ>u\`]PGZbN"P'!UIo
;]-/Y!>,kD&MV+nCUM\nZWCL^2%'Z*(Y;o5c)c?I&-3@S!>,lo=qIXEJ.3n%h07c0
7j!.iX]r9CAX6K=#S&S$bSWQ7Q@7jA$.s:?WLO6MJ-^s]#addMi.JK6k*p![Cp:_[
2KIm"bdMtVJ-^s]#`(_t#rEM#RsWSI-;F&Hc4Q>OIJ``KLJ-KiJ1VY(15^SfLk#be
5U$50$[DO4Vu<m@*dc,BFQnsU:HM!1"@PKX7%gdke4%.c(uhBY?EuNHGf'c"i]kG-
HLJQAm-qn'pD2F0T6sN<2@`6l76guD5QjKJ`WZ(OGeNe$ZVI&Pq;q!Ygq9'h!>,kD
&J0L%JXQu!5QCZ1#D<pUG&4#hK]55XPZ.KbS"W3)g4^>LBWOKiP(:ebdLQp$!>,kD
&Z?Y"9fLnXqXj#^>A^cJh>3e!76guD5QjKJjoY7ho?OZc6\]-6B8n^5d(0#<X6mI\
T$&+CD78-aO[gIt2Jq/Yp8.^2(ZMg?P[=P]5QjJ?"<%mi5CU6s]',lcF\*OXd2il2
!>,log(C9oJE77.-_GeGh1A^1@0OPSGf#+?%F04c[F_jnc8s/&[;4CP=IL6CY\@c"
Y6]r7#`+!:Lk#beJ-^s]#W,fg2&EJJHJZ,L?gH+7LOY6*I+X&]3ljdO*pkCN5Q16*
Y?sL9^o85jGpQjfm`hZ$M1>kfJ-^s]#`+!:Lk#be5T0\]'sNMEjd0?2cYK(mc8d]Z
A.@2J]mEt=%NXp6o?XllQX%r\)`;ApXh*etEZr_idLQp$JX0!&)DCbe1-_>A#`(ap
-c"HR8g5AZ,#F(\9a0lJs86A2DnWPAnA#-/IDUtg^jlGDCtLGZ!_Zu?SYM3+b4!q;
3a&u"+T`k764$2u[a5Dcdh[KM6pLg^"^Pr8WX+h\T]Q<!\`K-`<ioP:FVi4P.DA%5
;\\4B<8%la&SSu`Jq2AOY6Eed3cu%%8dX_W2O.TNSX'O<!eIogfJMb7!Lnh0nqqr'
9[*\s^mgdrY0K`E=uHCEhcfaHf@c'I)?LPUBkSs!#`+!:e<,7cG]e\CVF<`Q)O5iE
DiKWUQ&EFW7A/cE[Tg4Y2JCG[@u]),l0"[g[UY@]ekS6e'Yi^(TtH)>.11&<3]\Sh
,1)hcBRn^)Y*So6![<_\J=^[nBIU+jZtoe$'sNlL:UUi[7bG0(DHdbH7j!0/3d'_`
.)[FZ;C2teJZ52j#'a)D("W2;5g(IHk?H-Cp,[7,85#VQ!]FoYWf^X(fP45^*?lU-
9n@g!GYR-HW"1'p!f]K2caUoeW]ERVl6IJQ4*=k2SWsJ:^f3ii"2(W&U?[t25Qj1M
4l:?+Lk#bq8jEHd<)Ujd![8`gFXEa^?C`a"RMPu:BJ]d:^,6g4<@e2M*<?K!WU>r7
KLA'.VH*a:i(^=T<p(b1,,"+gmK!n2JPleF^m7Sbq*[IN7%hg.1r-0`"]4e7+9INl
5gQo/6`Z)5@&bFo!B\h;;OrmTLqqM45QeZuoucR46pLnII+(5$![:Gj!=@CV8L^8;
Lk#c\R=GKdFhRij?3EZhd0St3enA_sYm=$G"=.BQ\kB%:&ciT3=p\km2mlspSX0V<
J=^\j#=Lf[8gTR&^p\".b+^;ipYL8C_S`8#`bM'*IP/>+d_;@RrqgW9Roaq\+9E``
<<D-IbHjq-rs:gYa<S.8-CZ:?pu@E"m.T1P[mqNge?6RcqSYMhgj-jR=4i9MIV@o9
HZ#U#j+S:UYTZAg=O3R%D=uF\Dj3.HV4W55WBL1K_m]UEqhJI"q>TZ[YO&[K?F-&4
T%V\#GMNIOq"<6GmD^)`bj:s1L)Fg2^%TTboAcs^hQk_7>MG<6/t'+3G9^I!5QCYf
4oY6:f"QQZ>@WXMCmo(8nO;>aqe^]Rfk3+k/@Eu*[b,&Ig$$hYX]r8PRJe`1LRrE9
oucU573FaEe,kp@o!dM*lQ<ubbV;Wa(2I%3qsV;/[FSO)g9k^/hgG#i%9lk3+s6q2
:jiB`i+4]mp!m-W5kt-7O);W,k0#g\pYUJTm^qq*GMdhXbrY0lp;7D*A0#Rq)lp'G
MS8W,43%;##d.p>9.mcn$ffPsqonKApKlThX0&C)I9'XkL(1K\c9'A?]^nm&@YlD:
Nn%lS_Lr5=^]=\mkF[6AHg\GBD78,0[`gMM1h`J-A^Np_[EUYfgl$K3l7p=!j7BtT
at%YhBrBYRiPY'Rb:iV_25n=X.+Hhi-_G3fSTU7gnq;[P7a+UhmBlTbo?Z/Y%mB"J
_eY#JG-L;8]?Vhrm^qp+0/R:1D)QmV-2s\&>>)Wo3bK$QO$IF\]CsroHguF8AXD))
)fAbaX#2@aEo]dWeZ5#QZ-PQ(9T<4U1EmqC,1&:P1r.;s](b'.HNA*68LN2A!<]V<
:>&flbr+nepYW0CJ:6I;2sdfi*j^=oqB`S:Ag\A,++O49rqkUQVC>Pd?3JZ,#9MNr
!qsA*m^'WUq\oLTc9(L--24O1)0nfYcT_5NiJK=ZIer=#<Z_GqCp6URe&<,1Cg>kk
6\jCR_1NC)Cn\;AoHSaE5Q5p-UAr:ZO7_#YHg\Gb[b58^GZ-O#r:AZ4)f=[)?Ol_s
hqo!l%mKc]iT\o+PFc\EnZ(oF7A)aEW<Fhk(6:WP=Bg:Rp&,!,]OkqXMZ:2YGiB#k
o?9!HDcgf(Z<@h@&J0NY'@6aJIn]C4_:nY<DngR!btgP!`29#A])Q?/ndCS10W9^0
(;[QCQ<W&Y>AW9#AdoYo@QSJ;i<JW)]mHL\=KK,.dm<Kj[*qcm3IBP"2r/RS45u&@
]_/X6-OL/^b!,=1"9/-D$.r^(i=W<RMCW:DL.@1>@9[Z`[IM-6TS!`sl<:?@rTBf&
Hs&GkHPr#I_,Rq<kM&s\;0>JTcq":;$eU:L-edR<05f#(\EKZF]UMY@orXs'ERQr?
cpOp0Rl30Bgc1d=Y.6$^:PD5&"@Sp>">mpkh\ErWo?/f%[-ta+c>L>g<kJ1iRr-b_
GPtm'.DIdtG[l*rjd3:Vm(e/S^$,=VUQ<'Wklhl.i*DJ5>E&66H*b9`nr#*4nA9np
%9H=VN8&3YS[Y[P\DVsfmNSg3\>n!V[F\aN@mf1sbWJ]QJq*dqVlsm_TKump+]>JW
qJ%Z[3d'^uQX5!;0o)+kUEj)97u\EEV<@mY7A%*XkF?UR[k.+M)T%X89Td/S(u12:
o3mCpAktS_P]*&U1RrgIKfEFH6_d`q%mTu2mfJD/.s"+NIer;J3:!&]Lf[n0,eZ=]
b+**sF2.%D]CHs?hsN+&]%HSs0E8d-mMG<./$,t,brFaBL+oGVcC+_,o;,mt(B/QF
jU0X\g;4cPIEB-'36"n"JE7UPK&_kQcBp-*Mh.1[oR(Fg='Xo=!Yl8crs>PtmQXu$
LdZ.K8E<0TjP7)1e;$682u;_B%]RcM"[kTY7%btAi0hT_V5M*-qC?Rf_#M10`0t>E
c8t8:@W<19a9f,q1$<Eo3T1c7nJ\r`LQRMV&37Q?3U:F%eQ#]H\mB^IV<FhLIYp10
lkhbA&NMf-aM"s?>`^.Z]Q`i$OaAf$9q!mfE\=`H/@3P5^&IloOUDpA3<AC93&)%+
GL4FU4n[S%f6Ju;1X.aTjMYnWnA,A,hm=De'?H<*],J4&M8"ETgrYmgFk'J:-\`j)
B/XcG@,K6]\(ou(3>(Y:_dp1*<f<JUO1tDKMo^`[c\VJ;$!<gt:gZR3S3(fQVVae*
-Vobm4)F!?MhXT%henIP5B$B4:JS,_479Uge=f6ba9fAtM9<oa:%d,Rc'=9$otSP+
)&##-?M*8a+>bM4!crVkmKL!_<u3D:EpgE!Hg0H+2(7C+E8=s^KR_EYJ*n;#!]K@h
R^T^:\3BO2Yg9>nD7CB&OdiD@[@=h9m9YNXm;FEmS3%f=&J+sT-q9lr-O'PGL5-6<
.6A?6aLu0Ws7+ZDd.3elD:8ad')L_PjV0e+*>\_g&:nF\+?\DI9ns[eUPP_K?+X]`
?YQ@%r,WqlR@E1;ecd1TS@'u\j,Q3qhgb[^J)"!:?e3JON80pos74VBJF_55%UkCE
-1QI(gF&S;U>JF>,!Z`R+]0nEMKYMD3-%<RI$p7$?9*$AfZ:TY8"kB"G?hp-j:FO$
7-L.^cKRbMm38cKqp\P?ou@Z+D"#%.c@-_K`AW<%,fDb@&4UC1MHC8.=d[+QXDcgd
DWacc[@_M%iIhmB1$=S_75b*(PP:/+%`ujtkm"f!f3*\Mk=Y.[\]DL6T6$W"XM.p?
S#.cD:q3/m^)q5VDKOWM[l*ABP(7*`_tgh<eID)YKH6RE+!hL1!>-_LTV<e;Q<=.X
%1f#,nkGb?S!"&5J-\hC"Mus<C-&85cGd?O7L0\eV8[qgG/D80mP_!r/ms;8'aq*a
'D8!jem$IMA!'.:](rX<fK*)@DgeG<2rB#3f:+9uYmPOL_@&$@C=g^So_Yo1N?(+3
s)p\SZLY5N[59LD6O#r[>8kSLMd$N#3*:c<TV6&6rV#j'\)2X]?OS7ekBMRjrBnAd
dT8gZ_V;VAHAa2!SU5=gb04eeqX!P)GMdg)qn`lF`%I]][-b<V7a<#4drpmc&Rk*n
[41rlb700j1Z'h%YO;RP6OK.-%5ui]m)o/W=2:\M$O_E.3J&PA2^Jd_%mKd(T+CZb
92+-AI$@#a"@Sn"JVp'6r.j`m,^G_-2tt8j`tod`[JK#M>M<[c6=8r?OpHko#Y](<
_D?=L40LL(K6o7h\8I:$n"tuCWXIr'@Hh5c(=%/^$eSj`N!l5%?@F,rg`4r0W2#B1
>SMNLT["omcThGWJ)&;hc)TpmZd8@BE</ORESZc\/0ZrC^bQ@R1+mTa<k\FgL1%u;
(K$(5C_3gfgU?bpiW\<C[ZnL(p<"nhoPW-bO*``N2(?)H[(_U2;o]OeBW_I!a[:+?
3rR\2X)`*0m;BQ'<qPDr5N`fAY[Gr*f3a#u3>O0`$SA_^AmbI+\H940[V-KIMCUE5
2P-'7/D$6[EV!Pt=^0*gcCL#Z#`+!:'I07u757+i/cm4>!_n>u#'a#+U?Y3M>]Wi)
*^0GZf*,^-3YWC7Lf5/Q=ot*VlIP1kF$:1iDV\&p#Ju`'q#kMQNHL@qZe>gSR5q0Z
"mfH3^#e(;Z!_#A%ESdSMO%Ia\HnO.gkSJ2W<NCh!]bPb)"R8=cI]16lDN9R/qs.Z
jVKjg"MS(feXnocR.$N6E7^u$?$=mIlO[sOm#R'C(R[3k*cJGbY]0/2,:(P8(:]VW
V/c`U3Gm/-iZ3d4RY<pO$.s4#\:@R&>Dr@?^>Yh4![8`g`<b[!;2gTsMgu(h5SG<f
dKb#!n-GBq\%%,b'3o'RP^FR'..!!&=;R+O&!4mHpXDJ?j6jP#,)\hl0a]?8fJ'cm
\.H9KjF!70?[U8Q2tu*KLEc`P72,Cl&YMFSKJN(V\JA:8Nf0q'Xd*nL-NZ,,Aa*hu
#[#l(8^+I$rj`"-qnlk2B$ELUjYnZcYHPY5RL_"c.\P+P-a6Qf@SX%`4<3I?/ZdNJ
71l#@6ng(T?p8I5OQY1rc?=.CNX'?Ad=Qdn#gT5FWdlCG<BQPq(?OAX377#lY9'mi
s%X320&!Z#4"k)I@cBT1UEfmb+9KLfkXeX1OH,6L#`(_Z+jeXBGQ\Q$(Mt#4g[)8m
mK^PZ?$BT:M@l6mTgr'f&p%C<Lfedmk'2e:Q;*BL.E($U_0G_1G=Mp;nt(=,krpS6
E:IJM$8/u/#oPsgPrp4'&.she=_=)CX\7s6_kP<D^%^C<Do_mo]bKcP<_lVL@*EgW
\Rg0$CG5>l1s)jYR[IN>V=EcEO3Uj0M&M<a`K`@*UW"5lX"&0@$h]d*b^l<=@=iEh
G/t2PUu[iLnQ+WDZ%X!#fZtuVqZs]#*<`"7G&SY.=m+)$I7.Ed6Bd4TJH^5pq!k$c
=l71$/66igRqp,!V(M*??A8TVmZo-h03gu+)O8hX2Ne3E>JA4gSJqU?6/eeb#Mf,'
M1>kf5VW=d;A:@Oj!#TI,1&^`[,_6/+qDd;!c.PdGL*iELf[ha3=[:r_\*7k+c%7P
+2Z@+!U;7g#ggAmIJ``ckg?/RICS(<j:93AHXU%tXICB#;%SEel!Jr=e^&*.DVE%_
bPYM;&gMW,]#9!Hd&2,!r'#Q*Gk&p2QJ,b-T[8/k2(lAF)alNK`@qgdH*[XA_Ql\D
=<M;gJJdZ[*\.+tqu>;1&$U88WpPk'%4Qlc'gX9%0;*h<LbrhoMguKFBd16iF?pJ6
=V*uI'1>ZS9(hYRoT"GYV1X/o-m0^.<+Nc8)a/2)B9R0&lmCE14kK?hS*\Eq\^+eu
mQ"q*:_uY:q_6ci'`]A\OF=LkRr?#dgqUt*!Vg71p@X$@'/m5#e0h@1jX;/;Z-S[j
(*+NnOE_NME#pn2giGu&F1Zf\&Qn`X],+sN\0:k9cn-n5@oHI58'?r%E=/!HZ3W"Q
Ni/@a]#;ncc$H5[pV;eR"X+ukKKqI!hEV500GK1j&.en0@)NX21(m6YDL:r+HK'c/
_K4$d(D^1fTjT.MOe@!Z%7VIl&]].B]]=h#B:lm-S.A*AJpI92\jopnE.XJX#;`K!
H<0)C,I4RjjC'CUn]saM,7E6V)bg,GlX^2\f#:0cj#J48Q.7_-0g.<'%^tg`(m,:t
`gYaYIkc^Q_6he0LhnaSF8AboZQ6([ln$dsKW]<ukR[S4^tuHO_)/qJPIEu>?s;i'
hOT9>S('01f#(7.):=MT+W#2T(@40[X<cdg3u9m/Jk%M1JbU80NRUE;c/D^XpZhZA
rEGhhX1AUg@M'0&/J_-Y-3T!P&1@tg:%1c-<XJMW^ie77(X0-bYk)abBl<fAAT4hI
QG=89dT-Eb)YIL8_ne2"*Jn]3q2\uGlJG'..OpVn(ek-$?q4-J.[:PV!^^8r!h/%A
J4)=c!!1hu)Q$2r&o><u0GE(N-rKjc3.XNqC?FGOqedb9m9_:2$!M1e#Sp@GF*rUc
KT6u'o?TWcfKSV/%_0@qF3IKhNn$`orEH\jV:#^%@3Qfq4&#:3[h')P6D+Pd1r8JY
/4CR-!d<'iY^NrgpYC$8BYM/lB'0;PK+C/UnXAjE%d&#8n\*-Wf3EAk\EKZF)HeW!
e5B`Njd2%jbQf26@!Kk!hU6X,NZZccNMG!'B-GVD![=lIiMO);J.N7n"%PTi]R`GQ
%#'3C(_?c6hZa4jZ4R-q5X5I\#!u9(KRaUN%g4`*)\4s0Q9nt!&Q&KcN`&rLKg:+n
Lqr_>S)+bZ69keb*!&e'"qJ1!'EUU/5R=<<)\CB=7L7KD!>3s&#Z4S5!^^9W&C:Pu
4QNSI$A!1b5lKFs8mQQT!rX8b!o"f7H:nML!?j.9">mq63984Y#RGt^+e\gO5X6h=
+]&7D6ssdQ6rcMY#_DM25SLg#OL&[N"ND#Sol&k=Fk'V#oS7r&Ck&tZ/Kl5>KYYA8
cie:FO=N[A+9Vn%JGQ_U!Ng0k5Re89JZXJ7<<XNg"NCNE:%6.icDm]P(e4_Y^Q##<
<G*K%*s*XjrSaW_KRaUF!WtqX'>/l`Xpg#7&/Yr[lJDdK['C8F2*aD0[K]&t'nh)K
(_6a+_&EnFX-Q([*"c$I2NC[:SV9=Y#`-:iLR[-5!^]-X$lf:Bn-0B51)'dV?pG!r
IiAsGb!lZd!!*\a)@02?&->1+4:ojBD`m*^=pfh#6pU_*3(dJ!('=FX+9L:>DL+q]
#QZ)&E!/#6)`Zp$:^@>X!?n-8D*U?:)^/#["@QX5+@K3q#RH"O5X6!qnW:(l.0RX&
!VLBk.!='C#kWn&#],"#kq+&$"GFS+&^UZ!i/fHV+WpmlKRip.!<K<=KKotX&:ps7
&6/lW+9][d!DW('6dD^.&/[n?eA%!<e5^-)clW<5Yl3OX[tK8C&-;r(5SLe]6`piO
J.NP/!p\YI"LPHH!]<5."L\M$<#((:&/Yo\1r1+A3NJH4?lTbTs#,m8=.P%1IgCkG
p4o-o&ctBb#Rh[RTAU/@@q@%kKRaUN&->Fd$n*K7,6WZb<=odnXfCG]DBU,*`XW"]
fWc+#.P(_B%KR0oYnOYt/-L8g5QnN.aRk&q&->0`#RH"O6bjL76nlVVp8YA/&->1+
PRnCW*@5Eu/4)T-#QZ(k"@a(+&_I[1N/AnaKRaUN1B^*Ra%YEkXq2-G69ke^JUS.A
JaE\"]d!Z5J.N7n73`oV>;W'H:C%4,+Wpo@5Re;:JZYVB<@&e2"GB#D&J0MqT[6YK
+Wpo@J.N7nK18*/G0l$q59V-PKRaWT69kZ3$PhJ2!^]-X#QZ(k"I]l5JSg!+?\Eq@
&->1+8-k$e%LIAk.g1NU&.en0TLoKG^fF$1.]X*l!^`Qo#`-:I=15,s&.en05R7XH
_@R90/IY5t,QrdN&.eo,5X5Hq'&`"S+Wpo@J.N7nj+;dem'oSiob7Ho5R<<,![=kD
/K^6Q#RCGS+9[A580B#V3tc"!+bY@W&-?@&J-bMo2ZWq%"GD::&->1k3s$V1h(_e9
+Wpo@J.O+N!>3uT0iecN5R7Vr+Wpn;O+7LPj[H*T#QZ(k"DWL<#])*2W(I<r+Wpo@
J.O+F!>3t)nQ"j@5R7Vr+cm38&_MIj.@(MV!^]-X#_B6M5Ql83`NRDl!?iQg7Krl*
fT?c"$6fV+J.N7n6==mI&:kj-fr/FJ5R7XHEC)nnG+>A1\dAH]+9[@J&Ejc.&_K9u
dq_98#RCGS:acAhY_Brn`.WXP&->0`#h0Lg&_MEP<OEG@69kfU%07'nW_#nG'`p]e
#RCGS0E_MH@#"`nZ4m@,5R7XH#mc@&:4P_kKRaUF!^]-X#_?"Z6ss42d<?`V"GD::
(^:$cYer_3GmXQq+9[@J&?$EI,-VdqR#3BsKRaW4.0:]t2&33m,m<L`J5;Qu:`%YJ
#RCGS+9[?_OU,d.`>7F6Zd($U8Ym^9.Y3*UCaI#q64/;66pLlu4QW_L$NVCn"GB$a
"@QY0A#'t76pLm`SoRi5KKq+#DuuLS8M05&8dKtt,I%.?gW/<GI.GBZY(k(O"=fJJ
fk6ot[bPoH+9Gbm;5s\G+s6sA-ZFB+#RH"P&J0LF+(OCT"GD::&-CBK5QnN!nks1[
7mI3cGYFBs&.emH+Wphj&<KLR#RCGS+9ZG3J-]t.7&c(9M1>kJT>9\K+Wpp17mI3c
I#O>C&.en05R:<s!>3t!a\/H^*WZl*i\=Gj69kejKRa>E5sQn;+Wpo@J.SXg![=kV
&Z$u*-NYKrI0-=uKRaU^*ruu+nhF/T69ke^!?k8k"@QXu,qkOlGQ^EBMoSdG$3;;H
&-=&["TbT5KRaUF!^`P<#`-:I7[0oDT*U7gp'I6q'*:LnHiuiFbK!^F#QZ(k"GB%J
&.jDpQFp2NiXl`Q/KRie-j52g5mW:^('LFr&HY9a#RH"8+<U_i)c<UZI3Kd8gF$rd
9aD#UnduFa/K\Ka+9[@J&.eon69k[^>4PR*Map#8[WkK2U(@k;"X+ui>7clg7L08#
+Wpo&K7F5DD+(@\oSJ)(CnJN-2'F(Fb""]"[X=%!K+JRq69kfU$NUjlC<9,F/KOp)
f]"VcMF'Q6'SLuBCdC<9)'L+*KRaW4%0@`X[1T5bdO,)?Y^HSNf7\Yc-m&I%f^^at
%RNDd#QZ)F/HeILX!KEa[WhpC@#N').1-)!:_3[PYQY',A;#IE&->1k2@,,Sejbn(
8=p0D_"J))?5!B,TR6l1@*?Sm3=#X/+9[?_[1En#Xd6V!g>W\UJLqpAV'lJ"5X>[3
^_R'KOq@a^5R7XHg)qL>>8pG>,(1XX!o#)AH;+YNJasBaJLqsRjWF\ZJ.N7neNuM(
[T`6"Bo>JH"L`PKQ(eg$!X0_i!a?4t8k''l!?iQgC4h$BCi)S>MY)aU#]--KkqsV,
"Nj5""L`]:Q%KVZ!^]-X<!r^=fP8N$V(E_h&_Q(t<Jj+.#S_rB#])dl.N'BP"GD::
W!rePYdG(>.af[G,-ZIsVq6TP&1AV$&_QY/<XqG]#RCGS:b;f<@&kS,Q*to?6stqn
<%/.T+]&^O,-V4OWFU[4&.en0TJd(3^t(u>W^r`fLqr]jS6cj16D/]/6t"3Y=?-Wf
+Wpo@5d_.7JZY6N<8-=D&:lDS;l(lFKKqg/Lqjc/Ull;k69ke^J_D4h!a?U@WZlj8
+9L:FE-b4a#_DOY&:lDTA*"g9KRaUF!nBV&"L_M);JD%Z5QnN?9U2=`&-<"Y+9GaY
O@htJ#QZ(k"DWR>#]+?GWJ^>)J-]t`_!*^"+9]hW5QnNCN0T#,&->0`#ZM04&_Lj?
9;O3]!>3uD0ia)t5R8'WJ-]sW5UmWp+9[@J&?$$>,-\HeV(0n@![=js!iOY'J.O+N
!>3uT0iecN5R7Vr+]'`n6t!&A09rtj"@QXUa&FJp!?k8N![=iP!NBU_J.N7n6D-4B
LqqS2Pc@9H#`-:i$(P<8!^`Q-"@QY@a&k>-!?iQgKKupV&:psL]N!VE&J0LF*`Jm`
"GB#^#lOYiIh/HLIX9J447Bh'r-nS6a#Di3G2$lOS)=/+VL/.`"GD::&->1+*"W[4
*="$oNh$^mJaJ,NSd>E@0Mho'>&16Z`>)Hrb`b#Q?$9Ak3-ltUKRaUF!^`Q_#`-:I
<O/W+?3EZ(o-1#U69kg@Nkd;tq9-#'P"TuBkI0,_$VN%U7)q95-j53R&.en0TWSQV
^t)MkW`NL06t#U1V0G<l#Rgie:0Lb6?O%bVAKh81J.N7n,E.-Ylj*th72lL6,-V0#
=d]Nr+cmLk:0Lb6?h:"jGX=Y$#QZ)F<s1p!lRH&f.k^rJY^)@/4<YgM#)5C/(09/@
J\eOKKRaUF!^^:J&:!E4LVd>@h:3q$Fk9n8E,N2`o#h8^G0%RF^$As4\`K,m`7"r7
:fdcf@-]:FeOp0I(kF4iXL,/G(9!*C"GD::&-@8)nCV63L&'o(5J6^DCE:k`o?9#.
<a0Fk0od:^JN=nr!a>mYWX_@gL'XT_Y\UDPB"7d0bA13Q<CmH%!?iQgKKs_a[b58^
!'tH<k*]kRnA#,:KW1l@\m6$+(BV!15QnMRU/XR75eR_"CLO&fXd<j()^-=,KRaWt
%=rD#=D;,h_c*h@NIV:N[H4=7$\;J+J/4Fnm;&iCXNChM+Wpo@5RmqNBjmidblOE1
e-Z3gfNO,1Pn=)j63&Sg60Gu59<P:S&.en05R@"B5W^R!['./QWAgi:J-]u!jepN7
!?iQgKRaUF!^]-XN!TQf>$,KGa$fEsAeP4iYYB*#M\$F$69ke^!?iQgKRaUN9a"Y-
YgU7GVOUVcEY/k6/Jhcj/d-iX&.en05R7Vr+Wpmp6bp+6d_6J$W=l3J![=i`':=Y-
"GD::&->0`#RCGS0YRh&(A?6V:Y!"Zj4b!^]&k3@@kE.0?3gf;+Wpo@J.N7n6D/'!
*-TtC@@quAdCHG\':d3L#Qc3SKtsWTKRaUF!^]-X#QZ(k"GD::&->1kC]m.6b=5Uu
$NVCn"GD::&->0`#RCGS+9[?_+UEn>(':6D&HY9a#RCGS+9[@J&.en05R7XHZ4RY!
/K8,p0*HrY&.en05R7Vr+Wpo@J.N7nKchK>>6p0[6jO&!+Wpo@J.N7n69ke^!?iQg
b!nW![VUV^^(:hW69ke^!?iQgKRaUF!^]-X'S:i@C`tJ^&Kr8"KRaUF!^]-X#QZ(k
"GD::-lW1!fWl)iqEdFQ#Q[uEmKERj5QFAD5u]!M"GD::&->0`#RCGS:^@,d-Etf[
qeS7Z[*umgQX1ROIe_m;pEW<;.9t^thXH7YKUHJE3QsG>HsrRged:)K]5@J;pO1!g
!=T]rJ.N7n6D-:@#!E_;=)t,_"GD::&->1+F:jlSJNa#-j2:lnmiPk\iJ!DoiUkSp
+-&>?Lp5?'4,m4M7_(2sYbN`iPt_MiJLVid!aA*mWQ[[o#RCGS0^8r99ji2"D7=K>
EQ?&pXg#YL@H3>+%Z;sNBUEeZ)$d=hA!6>J^\fD5Fk9pXr:A5Ff3EAk//Mk[p=NkF
>m;NN4t!S'E/fN1<!XWi"=f@\qU5cZ03*+\A*T@D$3;:m"GB#^#SbN:qBE.W??b(6
QgiS8^,6mUjH3mDeQ;47.cn?!A]g7An%S[R='pA5:f_:>]4:41FjUZ"Hd7Kl"GD::
W##O#:[90"QX`0nUKRp(+WpoBLHs8bU1XPN*nP]"R4"F4+*5X\,=c'G1m$?Qp=LTt
:Aj=NO(qIl"4QDt"*N!#XA*lL/Hg`W&?%/^l;-^h>04#jE`=WDJ.NP=!bM&"4VLpS
Y5@Uq?bgLQUm"Ol*[3UbhI20[U,at*@F<.GZq$dj#1bt.4V7`^5R>jQ!VNA`OK7GE
%lpX*69keb%tV%_d@L[21<V3^DS#)0E5Do/KU#SABm>HpaSDj:Y);AZ9/!u#\FIQX
F1a6A;9EW]j,9jN/d-jC\0@UFZlYBs*:"b<eNsNIJ`.bK<^5:oJXpr7=i3&A4;1<Q
9JapM4@F5Nr7lA>"j$!\Zcj&RIer:KDiAV!Z5VBj,-%(>!?j/"#cKtiLZBc%HH8sk
&->1+GR0PaO7l7TVj_A#Gg>XRpYS2SDo99*c[O.C(0D]FoC^^Bn+H@YMI0Bd)_2J"
=WnmjKRb5=rj3`k5]Wr]**!@i+9[FS5["&!cNMf,o"Y><$kJ==ErOtrrSJGrcA=T7
k&M23ST3(V+Wpo@5W8hqT6<T#)UB_MC</uC'EUU/F:fq%*u0>I?'u51A7[X&JQ>+*
#lu1l"@`@loqs#WKE@#R3>MUhOq7[]@&sqgWui(-*U@>1ho_;9_#BgU4p_65+9][d
!VNA`OL+"M%lpX*69keb%tV%_d7OsPNpGA3UQ*,PhtbQh,p3l\I#sWD_"-Ti=@,7Y
#_DgpT`2;>ZBQ?p+\1'L#RH"?+])3(3YDShN]ZY7kF?TgoPXTQJ,Zb\jZie@cf#Ca
pd;R^at(BAhY"%KB6h4I^udpS:.OlKUf]rK#RH"L#a@2SGL'DHMF9^M/.t[R,m8n:
3$M1"5<<lfqu?ZQrsPm0[T`<>ge"_O?[]<fCaX`[q5gY%2T]FmFWhk1KL"W1:k)Y/
O_#;1Em02*2hcbn&-BBS.'"F13e9HcbVR.67ig+p#SG^l&5=W@=Uf1FKc6YOT7-Fd
nFFaULUlQ9X63CZns@*"0>@3j=E2:p)oladS4EZ6r9I_i$;Wk]A0[q[^]!QiN9&!<
!I`m"k#Yl7-0@,Ye5M,_k*RApc@>cP+2bedhA]ShiXG*@(0Mp,4nmajV3bKqGX_Z%
LHh:ZSPb9_EFb=4Dh%Xgps=d[']u$;rkMBB\)2X]=E)([__fh91J5WW:mQQA3?b)b
h,&T)%tR?5ooPq`+U!J6n.7"K+!!Cn^#Y>L_VTY.*VS0!TC@u(HmDJDdP1^_07O:8
s8(?bn])_)%;ZrMJj5UP^^;^Vd$":SQbF0Uhq;Y7h,>3Z]'HLi9R)D<5P(;ho^mTp
Oe7!g\a[QkIPH6E]AJUiY.aP_iR1@P/M`5hBq9_Ll!`bGG7K-&qqiV1AXbr_^]M<[
gMRtu\`]P<j,>dKFk0\CE3AdI='Q?oqqh(%l)1.;/A(8SiUF_qn!)$e4hLOPS&9-U
m1tO.,bFRJ^&.60_idYF)/(rfh/lS_F3ZcR0DC\[;o7h#Y?jc2]umXB9Il3\qU5cW
.7Xsr`uH3NM@^=#6D+D^AbDfc-a58:n3U5q^%LC'RL++;JE21G@il(7bV2E8j,Wl@
#IYj>NJD(&YXSg3rda,G,(ZW[\%hlY:CAT_Q)0gR3nF;kP>;\CD7A=tO['<OVDl1;
Rd:QC^]FMi;YIi"8aSoR^\5(=L&Lc'5>^d#%QZ#BO?iUJ/8jjbj,W)R5Q"sBDnl6#
6XVRZm'<kc`Z%FMl_^.h)GW9NKLj=de)QKR*k6FKD7>3HSp6uK!diaGf7c*5=<gu_
OC&SCY:PUQX"%h^5HTg=3g[0*Eg-`)B0#_WZsTktW`p%2leMlNR:i*O9KVXKSY?Pb
):i^jqq9<T,4Y$+cT]^gMotB.s7f+V"m"p-)TH*dG1X%rd@h4UbQ2qDFk?-@K+E\o
f3GX:3<b3a8`Jh)c9(KRg(l\gC=bQpJ%r&h2YiLF5DAQRk<#r.;A'8b=24U^SdKW#
NAj>t]CO)p7kIq@0:*7GX`&W'e:%mk^ok&m8qCg[SHpbb<m!rtJGD'_gq91=/8/ME
?$G,/nA5Q7K"t]3_$/fHTDiqWmBtOIm/_&PRb)Y3QnP\Z!g1D:WI[L=9-9'=rmb(W
9kQJccZs%]W=19OZF<cdY!R7CW/DX,5u_).m+(Bs/f$i>q8lD6-\=Sf4g6oli\KS\
`E0pc^@eV4`u]SPPbDI9?[r#>g#noMhXJlZ%o&EY%'+p)4S)7Rl<A)0`OZfc8%'sb
?[r%I1%)NcrU%Up[-Pm[&>?I[e-=QsJmlKOSCkQX6N4^n^$ir44Pb0^S*]j6T;U:>
--%^FE68s-FjA,+huE[F)muH2'&1/]+nGBBs8Bn0@jX;sdZmq4PW\NX,KVF9XHKZh
_@#i%ieoI-]Q`4XkJ]Dm&t@N[a(3's2b]1_`'<RX)Xm1`c[YrcA>uDk8rW*_Rr,T:
@cX;HNcf$W>&15Tb@mqsaX9=KalHO<qGlQ9+&%T\(r8jWR:V[pYJ'X%9S45K6TNWS
e5K.;9Ucg`Yj/6h->%#JG\eo*M-3Frms)l7Oq3$2K8C26`&*7/kH,i;Q-0GI/-C$0
(M9.R[Kc.aqU(AX78%Gn9$TK`XS@27br9QK8%l+;lDdr6A9cmLa#0HN^QIEl9Y)2;
%Qj$]fZ+i6Ctu>t4#)r\LctF?]r=`fY^n+*,JK?8]]VH"I.PULQps'?IE#!$r/6]g
`:d"dl=:POIl-,!k2qM7VW7VMH!GI=7?+TrC+H[;\%V0GNP(,FM,/LCl%IYe:H]Ha
n'itGO@PTkTeZDArj3``Y(I_=E[^WgDgq;I'DdkuJo,"2oGM7,eB=nh`2+!Pa`&e0
lhFIPL2@Q/I.>0c)*3aa]P@FOOuL,FNA7S=&1+2FCSYVOM9.*6C_EA."]==Z."@og
phta7o-4d)7EfD'_"t0q\=/W6=D$<*e5Y:5((T,e@i]R-&\3g.gV"NX1InNEn2=3e
RF,pE'YGP4YW]f\nr[4\,@Adu(Q_DfZ_.24,XIGflTf>7`eg,-,drIi1$r+Qqb33_
]]C`MUo0`'8u'ii9l@TK\K`\^jJ.c"R\\u2M/i+U_[e,V.*iEEj9$FsCeo:La39b-
?k1#)e3Z]NDHaZ*1(bXsgb\R!8;&.uSo/iUnBGm#1YuJJM'WdU.+H>qM;]V5*"nmm
M;EREXbf&EC>8RH.9AIVo@RQ629JL9>=j+A>fOPNHa^+70h56'FBAg!TR6V\Yi\?Q
nXTgd!^tZ#E8>`qI1p\)'^pV??iTuS)"7:`T2-:<M=]aLs#@R_g2#_]((8?&.E4sZ
]B,>_RaO&,lLa,\c[#*&doJ*9r:7@R6!;H(<!%>/pY9hRDKp;>(DOHM/2JeWo:+Tc
C0o0==0E*S9_W1sM="GX2r&@>@[83p*HBa']4JXjfSWq^j&[,oF@n>bT1>O>A=N@Q
2m!*)_jF[D!mCM]IhQ(X^p5(YJ<5a/JS"BMr:A61CeIMRr'U;*,0V[Olk4=)Ku!Q_
!o-4Ps"1gE+L#O$QlmJtm'.6'N]cmRW3s-=)V@r;Cu-V+RRmYr2\VTMSs]"/7V:N1
1`/N!Gm5G"o8M]c1p@D`BE7uo-a78q\OX7ZUe-6-R)XK7Aq//#6cPBqs).]]@iR;R
M/gar;*q1*kb3bihRW*hq\!t5PaK"#]XQ?b42lCd?Y6S^n+d*:5m`-9qP6Drile>b
A;mhbI/2lj:X&GW6(?YI1=WF2Uu-"j!$V"2Ei"_?!ouHAhLubP(cBZEDnU;CS>2eO
k=d;PnX[JpoVXoj`7]4X4_(q8pr+m)pWQc>]_CM@IlZ@QZO,39=_F9_hTM@L0Z\Ut
>^__X^=_RTSilSN'p<4'K7&)eKmW(\o.5k;)VArpJi('\OuVJ;>gDA1n%.&Yl>hPc
FL**)B3j!3Jr"kab:U2^Mg&:F@*RZ]6ajZTa_MVX>Nob!6_$7S7%LDY80c;EMYgNW
/Lg9g(-Cd\(s@>4o_<_.]II"pFgJ7@qYE(-^bS,^:.4$Hq$DmY881^Dn7#.$c3%R'
fjKFAir"A9_]Nq<8/VfSB'Pj*I.4sHF"HGn['BA=msWU3%F)>::0'cAhk#Uk'$"'U
N:D7");A<\7b3e;$S!rrNX?(Lb*3Vk"qN9_dO&d'A$iK#G='C"m]ie_[R8q=I40`9
36+$cVfjEhlOs!]Fm&rDD%-rQP=F/oSg:aoX(.ZCmoOo;qQHj?r?Rm[if!UH*?,$c
@6-3b$'O<lXi9<\Au*3=h='?5(1-nZ-a7^>gqt\1n>AMLW=e<\@ucE?552V62==mf
7"@u%T'c?4htcZl;)66'47&&rK8@#]m<PD]6YkrDdjojK/(gp;Hb;/\4>Wj/-ggZl
37AdR1r??:1T4i<DWTjun&3tK@%f1Fr4/]LEZp@.2n/dS1T)Qdp-8TK58/pp5j@N"
@%"+kG:0U'E.3iKScJ<THXK-)>Ko=TJj#2CpS_G7pq[Jicq&dKGufUijH6@B:mPu%
[M>u.m=KGlac\XD(;-c.>J9?'hl=jSNs/B.l^G2'&E=Sei'If''`0U#c<,ahB:aD.
G:ZO;r5rLaP/gJ@(K)CmN!WW&7,=qD3a#!b[9)fED=;5V39k>\9t#gpI9q4sReK>"
Jgc\&NRudcXT[5K^*_u:58#]3j&bjNd4h1^IZQh7::B/dE6=oe0DL,2ao^^#Y-mu3
7%<d+L34EhTSQCu+Jc8[[CZ4Ls80QE/Ok,r=F"k$2=<9(KBW0K53!bR3k[6FQ*5Q]
^5DS(mm*>0F('?L<L.RhlIPB+BK>"$!uc"`;N5^M3FoUB-N`V^qsS[k"?&t:bt1QK
o[-/Vk0thg,nG(9o^dMqe(FFok_t%2RYVLO;JkHAgg>meXcj'q@fJbUnD,h[b.\6E
kUZeIqsM):\?*CV=Ieo*J,S\?a*UsbUm60;Ob&%r242O4-VmnS]]oCV9LM"MVNWnm
F&S_gfj\NWcI;O5P!3&>m^3Fnb/HHu-3-_3HlsXuo:F^X$EXAuD=]I<^l8AMrZeOB
A?sZ&qB`A-?/NiDl77GacBO=$4n+kd=i;:S3m[_b[a?\faWk_.nH#qd#.>8M4RIak
GEZUI3nEi3bIERT)lG_s?&j1]LcS\jZs"$;pYeDu$!V5N7I8JG[N<k\s0=54\ll"/
:?7dR+m%hY.uVA1m\'BPhfiO^oo=fFIGUo,&EU1.o"(^%XT[5#.?E-X>UCJXcYe^G
rqMsjbYE)[@G;OC8;DnH![Q:a@E$7G45X39-b)$ukF!C_M3kXpK)B(8`r.`FrVYhC
+7F1kD(>X@!oL7d1Zu(6T)4NBe>GJFb=rnn_:"A%AT`JGH.m[m;8a1WH.nepCkTIc
?dHq+iUPM1RH,C[-p6Ho48U^,pc\$:'k5Onp6GP<Xeo:fb6.s$;_o\dKs8nPc6mN-
Z+&6g2t4[Xf)r(dFE3Bd=#uj&!_[1f7#DJG%Mj*'MPu:mUr8:dC@#_(;i"S9k>*In
embNN9XGF7bcCY)1p;Qhq=T0?XCcb`:4*99XO+(S][L^!5TF.q-SHPa\F5!6?SAmX
qPFM(XgZs+UGf9847Dj:JRpRQo5^R\djFLZ24)%5JD"7EJ9[ikolO<;lPB'POf,=C
:H&@0MHAYXO[k_nl<1UZ0&sOnCY\2RANAn\+R3KCdlMq4EHb*(ifDZLHT:flOOY_D
AO5AbbO$ih3a#"!H.,hGRNV87Dliu/^s[^Ykgnpna'Ptf2%-.kehpc@^U=bWg)+!`
-^,UtY?5M4V=Z[plAX+^,?A(kdc;%o\Q0Ba=ZA?6CG<#P8rrf4Z.RO3,<034B`cI_
cHCm_1EfDg/4:/41:Zcc^>n^FZM5Dn1)'5cq^_fl]A;23#V7A]LOg+@)D%b7B`bs.
P"R\OP;fN6'ta9`r*DR63mH4+[oNWb;_oU+b*Z5;L:!h#Rr,TjNu@"uoL!$:(+2-#
$#+4H!"]AZ6e_GRfM@@%>MhreF$`ntfLe8SAWd&q1?RK9)fN9g55M(kpV=)/l'bR!
@__``D]6C*'2L_Fk)['?[g<h30`/[sk4-J6DsW8(dPCC!Q_RisLm'\uE'GA1+?>`0
pqR+Qqb0/5RhARnhfG5-bZY;jn$*5doce;-1q8_UESC<LhL"]3Mr575p,[J<Jrbad
<^="YRU!5#lp#7p%/SmVaHK,c[R+/n8_oerH0Bo_Sp!C\H"?18NQ]l,fXTG?Y4\m%
*:m>F0erAVJbl7GCKeb3qBk[GHr8;91%E9O+`Eu@s"ddcU-)I+l#E1R\qQB8\+Ro=
\]chP1n==1:+l`ne1HLI>1^.@dRmo8b:n[UE9i',5&"rYpr`*`OjB4RDAIeGPBPfn
jH<.[3T`,<Ao<b1"6]:nk&VG:T5.a7CWF91Ei/"WhR49]B^]7<`oV;&=QgmgC%q!#
/FRdtG9X76e/SZf?o]tFF%8&L&5cd@6IW^QMhZeK"P[l6'H<l_1mkT@6<l[V2n8!b
lWYk@_Wegkcuq)f@261-i6BQP@aJa`#2WqeN-,0[UEBGJN5L'E*'M%)U[\5YX<d@#
a2"pGKYbGkg=[$W+JYM<knC_IjZX]$H4kgAQb=P%#iI^R&g@[FolSWXcmL!kDS'aZ
Rk+"GkQrdaTj`ZU6S*N&]r[<n>`15GBM=%6]*"k1[(c'iD_re7XI?$HAeA,L;m.;)
D%.%^J'NS_EBsNZl^HZ4M[:GW2P-Ota!(RE'%kfh7NR`;ITBM&q9C)ZJ(b(emup"U
^ZV28@T9_IljKRA7(Z.6P=M4Q6<Z!?lG:C=e%]dFF__ehRoboo*LG]$C0^%.f6UIt
NkJU-[Bm#M-*YH.o2q#`6ed=$*QC_J!7t`n-dP2pS#&k`MqQ4(.$'Wc3t!L[g)='i
AmAe@0E%Z8OnM+L8^k(gZlpgol+Dab6'U!4-='qAB+\861N3$'U-)u0"7m`:*AJ'r
qp*8,YQl4o?m@l4OI'0h\bM^M1]=JST-gdFMq1</=LKW'4kKt)(%Sa/Fp,6X]+]ad
M"jdP/<,0T&$nbE.ie_h!_tf*=3NL8jEN(Jhp;2Q)r/B3lV8?!iUh%Ff]+dDFOS3h
MZ&M%G_r>ChIT^<Z/UY/0da?qiF$'u_LpF'Psu$iHCs?3hu2uQQSV>[dqM+.=KNhj
3dQ:qb'*V%i\;R][g2(%r0G\\Z?h91&45Jh'9/t%n>&PZcTj`55P1W[`BED6NKm2-
6SWP`Z,R^P3T&4\&g0cI7WN;RX0"?6B[n$AM"\#V\a\hHAm(A?24skslP78B.:sb)
`iQK:#=^7`JW5jYq@^i.kO.QMdq#/&o6Q5q:?g;;AB4g@R_WC(#/8$rfu%O%S`WM_
/!DtekE%J-!lVpM@(3q//IQai_u^T%]LfHUVq'"k;]^5=$KY]'%o0m<$g"4'm=n]O
G(D)B0='r!93n-9)lu\\`jHjfQ")H_7.`k6XD>*I/E7Y,W,/YgXO(=c',tj;Gp`+<
/9UMe&9Y<WTan7$CUK8po(nV?8FOn&\2s*Yh.o5po2qQBZ3=*3lPdg_YAA^ZhZR!r
?./h+a]R[Pdo_?5Id:U]]YhUmLF`MM;1c_r+W/6qB]qV*o\&I[C>dWd:^!)3]Ibi;
Tl,P@s8Mc_-q$8^C%l?)ReZ_&jCrf^YS!n4Ifh(&GV<XW4VL2iYn1"a<D;V^81C)0
qoNeDPP)TC4`C*i[FUZN#RI=7OQ=,Aa+i2S["FH23n6uV%a5/La$"i^E60'?4$@jS
M[Sc_%AX;u-28'6nOq%i"t7cBAYh7)33SVXRuS8ikacoY:AT%gEi%[Xp6iKXRTTq#
6_$>^.n<X/Ur03O(/DeD'3H%'ckIVSZrp?h?.-Xd()ZYRf0GnZ911u2_IW7/VqW]U
oWr_5gU2r_n]1UBs.77OLT8t@MK36&`'c\j"]6Z5ROegj(3WijV,,#j#X[;"VrY)i
a^_<6a+C7ZPtED3WRgd2hWIEMIDLtf^]GhZ*XR+o:.Eog.$&LF.mAnlrgVj2>'C`P
d3+#WD9p76(9:S3a)Mb#]tD5a4RIm]"I;K!*(ZgoL)^iP[CU;]c]^e6p7#NNL%Q.R
RhZO(FP^ZXhT'TDIsIJr6j[08k%50GXNc-a7N)Co!g.][PKTB'e/?FY6Cr?2<fhCN
+?l*:UuUQNfBu`XpGd,j.KqJLd:F@YJP?eQ3Ze#,7g3VbCrAgO!GP!_K:pVV@$6k*
2t,q8J1Fe7_bNue%8HtlDUL82Bh-b4?'c%i"WTId8NV\G>cEsO,LB%jrP#F$+>3f]
:\,bfg@;0ia*oRq+Gj7P2-C\_BeRDbNF/+75PX/h6a7d!A>R.fRUmY-eacfjFH]Yc
To]Jej"L_WC`4m-Y?!$GC-g@o\u$2aNf_'Z^WW)sA/)nG^5$/)T+S5KL$2sUjSg<Y
bP[rcE$pX@K12.@7P*BNqMTB5UlP?D^e,"C/6<O-Z6FlcqfX"NjnKc1G+;6I%r6bQ
c8_RJ*p:P@\(je4XLZ]dVD4b3mc:YiCFImJ(1OYo07;^dET+N.]>HC_ZZ[@%/C1K0
k*f<_NU1jBGL6SA!sr/j\UtL:(tT%(mWZ62ZpkhT-GOCS>B'u(Dng_TkFEZ]WEai+
@l6=o=j(G1=5d,mGg6(-R-3jE6n-b<F>1sVi:jV3At&sF#S]tM=FMEX6X'\0Ps&ro
jd,GIR?7[EE83@S*XI<J"Os&UTi/RNiugi:Wkes0YfV/E9kl@VA+4eW8^+W:"Ilc2
4UU>d,aae@b\(';c$Cf#AHX>D2U,M]D-aBJ0hp&4Mchb$>;1!)_5ppoD2S]iBU[rM
0&n?k2_B#'dM\[@LQS-8">nn\n%H!/k,>3Bh:=5KmXgRk`bcr!_6t+:dVM&0i</0t
/#ZkT&d%m`QD.KY:0;-T:HH]ACb*^4S;;)aMnudcnPun<$DtoRk%>pk!^e[42^(b'
DApo1H^^Gh4<\/?2iKj'duXej3t>lA(2O!s(o[nO<G=d;b`cit,1sb!B"]S):uVr,
8fQ`udVkdBbdU;Vh+49!G1T94L`a9h(X4U&K#$*?="sC8_*"C17c?>]riiWM0"]%s
dI6aS'nOVb=BQ(a?gcqhb=kHYR23cXeFmDWgXd;J>_oNLk7"fQ2dV#n:i.)kD3_QW
%l&nqB,bi1@>'N;U5V&5l;'oT5WO`M3AptN>-hV*[9t@P`.$,-mDfB4m\=IJ@"Sp*
"W(Fjr0"c''S09dCRW1mk2/gDXTZ)!G87SJ#aEl#NWaoU0gK8P"aoU7Vh1nhK;n#]
[GjWd,-[)FkA+30XE1Oj.KkET&?$ZPl;-^h;ou:INco/*0P<k;W1$)EW3J,`:r2iY
#4q=*Cb&2`I=f]sl.\H8W0.;r>%G"gAkj;h#=M),s$/kLAq_F*<^/WC"L]=[k2JOk
XaFNaYLaluRh)d0)Ha`/'h\f<!?k8]"Os'p6^EmFZQ(\#[(UnhP(Y+nk.)lYCu8_V
:\_d"0fHe>DZ`G$8eshW^bsd$c3?J@[ku`$dpSdF)u&uu*XJ"\Nt.\qRTo-g7fp;@
o=u*n>@8E3gIfRMN!38\0"g\jW0M3=Z-<@_fJ^OPgb,XY[:H&969ke^J_D?Arj3^j
Q5o368(Bp3#_CqX:f]eADush<C'OYCjpF.e`b4D9>IaOpX$pF.JM`5HAMp\`'M5J8
!?iQg.Z&]Pdn5L76D5^G$'=A*&.en0TI0lbl:2(S@#mD;\8_B9a2c>46@e5T&_N]/
67J&?C1*kP<f%.a+WpnW(]j<-,:o?+MC(@W!1'>d!?iQg1(Yk7+!!=lAYV.Rk28/r
e"?V]oYe>e55RaoG%nGI@).4!>^U$JD!-1;".R[lMRleg""UC!8k0-m!?k8S"Os&E
78f]".62Rk7o+hh&.ep!&1FS$*B8UeXXIgkiH]\4V3c(JeG+L3'j$'"QX*WeS/R1t
s.QLu<d[K(U(@k;6=@/4:k(O[o#Y)saY>GHMC/O[J.TdkTWETakQI4:ro5+##hNF5
I@,HVfu$,a/_!&Dem!'Pa67J+B"pW,SFRh)<WgO3]4-aL!a%a->f*MAXr?GmF3]=P
'5NSsDRq:0o#`Ikn\l:TF3QRDa8E-Qm^dY)]glO//:Gl)LY9H;if!dq*pV#Ol@_D"
i=E18C-;F?#Fs&t8<._8R",,2_oFt7Z#I]#B7r.o>Vl(Xr_-B:!!;F]ld61fa*Pg(
[1EC+@!DsAeW5^nJ_aq-D;k\\8mZYj<=Ml8b_J.7I.OT>m^pLGF?f8Q^ue"dX9OtD
GJtIh"J0u.\ZjIN)hhjh=XG,/a<:X;i\,fWbHT8Ql\%M$kta%k2nngAJN`T0*HY-4
Ebr/6<mb.ISpTlCj/fuklLFX$^ARruIh*)d/3Z0]auT*bEss54/>T\.'inE[*-&n/
@EOf`n^0;0nVsd3L)YlRc8mI<qWO]ZJ)^CDFk9p.oi6D^@g(;RejK4q@m/nO=pP-P
0K]K\l:6V)?o^l=M'QNpWM^6X?@-O6k<%SS5T6OrS2kc9/[kj0Z+U>RfR/L?e\Lb;
Y#qHR!/0h$+9-RfD7.p2QbN*gJJW8#jd2$]'+H>P5_&O?hi27Y??4.6Ok=7\#QdY(
[&L1dkbF1KkFHg'K@'1:M_2@C=Ei[4Sb,udAX2cQGJ?4Scd4crIe_lQp\*6LO%+/'
Cl&CJ-'/qsi?/!U#>m#+Lo:hoNI^lSHAGpKXG7dRW5UHmO]os._]Sk3I/(T$%eIn#
:[=eNrT0AQNkT-'+[0PIgi?'f)R&nlHZ-^:BYO<)CV&tAQuca@[G5fGKt"b_D14S<
as->YIeBc2p:%e"bV[dB'.fI3SpTlb[mqU<0Ra:leW132^bTn?15Jt@NA]:Sn:TM>
gMOh;2r"tYpV$%7a_%`N(P0hd=BQ(a?g`e/C'\5?^sQ/+h/udUiu_h-m^_MPE93?d
L<kAKo8RQ0P7ZuLGM]lM$s2KJIm14aYg5Q6Hscqc+Ug\"ePoI)^&""tHmMsAUn,T_
H0:`<K"qHB*-9?OLu1g4H#W2^kCtX=nV_AeB,cMU&5[j[O#A+@ejGI]Xi2urO]orR
0pK<<\ng*<ZLudQ[m#i0J,A!XLA/I_rGfJ[OVX\&n%S\=B6W-N8,2@N^D\`=pu68P
M'n&F\)4nK%I2(;11M2O2r8dhZrH&'OOes^)W(MMmsZ&hKX#iToO_5W1!]d\2noYH
T6tZMO0u*(l?iI@.'"F13e>!&Jd\=+0LtH)-^OZQ0Gifj6TFA0UV_?CXk0mi7:>^Q
<`T=GQb-^d&d"Hf^@-L=Me9kRmBp$Q76CPIo/!eJklb.orS6R"QbJa\q<kl`%Z;sN
BI'dCfW<G[^uFJRCL?sBHtA$MAr&hl_O9h1>1:A?R!nc]Su"diJUQpnfA_=>aYR+,
"X0Q<ZlX'LEib$9-W>q3>9fufIc#SJKb&Y%KCK^@(qL;]aPqBtD3n!A*..%WJarBV
1X?IWSTIaCJURLif-BO.lD^[j**ulqjcq&V-1<e+ktR/E3#RDIZ".<Zc(!Vgk/K4W
coPM$^]496!r^T?rj:_\lgO.C%g:&?7u'iI++O4YW-MsNB7U4%#ljhc5NCTUIR*/e
o:Q%F]_B,.:#F+d=TgW!9QE1W&#QUfFkC,XK`_fE+Jd8)EI`_A/S7MSmde!/C_gJN
kB-Ug\&U'#Bn3qrm;L$il$KP)Vk8G7^rgK&J-?.(jWAg4Tt%Cu'u(c?AY=a5;FVWh
&N8Kjj+&"J].i]do7l(EgF`E$j0T<;rX:Sl<j'8-5mW]4?jkZ(+s8lU(@P,ED4&mF
Bfo^Mp!m`0Ldi-Mfe7n&9htCaCTXuk&D0oV3@,;A/0j!3(p]"[dP8c^'.oJoT<3QY
0>cTLg>$kFFhD7iGEG<0M7thW55=&ZYN^M\&1FS$*BJa?:95(VlW`7]/$dDXgFPC)
BcEb`!tj/qi1qEZe\G'ck[R$mi-],nM)\CBT+-AM57F2u0H&(uqU(?n15i]iV3bL,
cYG/^/Ee<#q++V(Z,NHZ;`biN&_M2Q4=]g,dn\;!dq+kO('jC%F$?ps#==:_#^^%0
TliWoB+3oRZMjI"Igsk$2kAjWF\EBDIp*B!99/\,A&#E"ar6,=-pRRUO1H)/D5V/O
>9iUBb:_0[i?pkcaagAYA-aa@K2u/iV$R9jr,JNYs8DZsT0'B(4nHlR7n"*0QZ7$(
KbodH@TgpPDR7PB9BIsq=l\V+7iiPMT[;nsZr3he!bM&",=,]LhaJ>e'RreP55A_V
RQ,@tZMCIqIB%4,"9/rg!EWrq5ZnPtI?&V/WX.O*Qt'Y$/Z/8l@ep2#A\U8A'0'*H
\39cZ_jQt6?i8n"iT[84mT@_JVO8cYiY.sJ(l,g+;eGa"Fs>%R#V6jU*g;+tqe7d+
_L.`cerVa3'8K"7p;4,sU!oF\Xm,(s4V:M?=qA/9NqJKD^U;.g7NsFcNu1CVf78]1
(-TUTWeYT!eQEKM6gQc!(@_0m21Dd^b#T>pPo5q2,-^j"^krEW53o;V`o@!`?iQ#7
<I"%`i.2--58qb#+gj:b_LWBlCUW?/e^&_$]UUicZJ^_orj8!#)_QGCD$7LG'[=Nb
L;:BFSpBId\8RBL&!LP-\3KHT.KZ(M0upig#*pod`>U$*(0kgp\,silO[7.-Tna[-
c%nAa'f*nf+J(q?fh9d40G.dPmM$e>-_,-BgF*K-b:^DCF?&75i-(7S&m2RkbVn3l
dCUT_/6W-^))35Q;+>?B)N]fnl8\\9RD:ME;&F3Se=Y;ZrfUbSjOeB&ZE00Z$WC/f
Q=ETV/'7K'[^_uL_;lGSgS+c(l**Far:8%+G*\o\as+&<NS"TU(s/a"*]O12g1dIE
(.L8bUjc\G_AAsB0NM;GMuMXe%u,/N3@?HAqKlB*jioaA*(`2EQbB^4ogb[VIWXWV
Co\thoq-<N3TEU"en99BMnnI@.5VeI6t#WF<TdKMYJ5P]a\RB6A4At8)+<.Jaso+-
]YksG/#mBg]lr@r]^j2qO_!H7Od50K+YSBm*Cqp*")u7q3oG/6c%k3LY'6]a`QqZh
1(QS?RErgfS(2N,<Z#`Xar7M))qDdV??.#Jk+e/N4)6+aLsnPhOr,"g#Kl`Pib)s@
d:hNB^KVh_o[,YBa09U$8dTN3.$MG%f>dB=1XY#e'+<?80ugR<NAG)[?P6IIi@BM1
Ns`8"/$?Bk1dR-\m9eFhaa87hk*S>m]i1jo!bM&",=,`5iF?2F`eTg2&,^[WZ0.0(
WA$9t22K'16`d?nQ7mI$)C5O5SDmX"9u\$#+`s2iZ:Vs_/k9/T2N')64:pLL\>\o+
^\oaI@ZK$V;1o2N!?==t-#O0;#qT_uc8F3YEC.K]!U7Bs4ZIi+8OZ\$)N]fr@#W2a
qgnT`2OB\qmSt&(or$?*?+T*[@iC?sqqTI8$%EM".p6D*WuE$#EnhVo@I)o#c4=+q
9=*"Clt8Q;Uo\P@8iT$*[`Eh6b9XOjOO%dQh)6E*k0+g?PN@LcaR/]:0"'2,iRV4O
NE^nbf1PNqYUgu>Z2b9IN0.g1@k=`90noZmn\c+24oT#PQd7kmCtphir`>-1;5c\\
hKFfXO:@br@]Fr;1a[[B!ZU((-EWiqiL'sf2h_2/]W;='06bAR,m="FZ-W*[$SRH?
b(_2F-;pqX14Tu3D.2Q;)2.crSJ)eap@s]j!IJA(pA,@_m)*7_MnMBC.]#k/4o$W1
$X#n[]#lM'"==?^XrPd,0gSs>b7)7T&%=X#-YksoJ'=qmns@,0ea#uNo6=D\XZ$=H
:[902afun-m'dbtXHB#TEjR'W8-Fru_sE\/X/NfX11P)\@,h(L?iN0%58efN3,K-'
&m3G$`=jtK^_2KS`RU,E/fDp0=kMSN`uX3+TiNP%3%nh>%8IHtA;uq:55JqD3tA$k
b3n``=s!l>lUQpHpCn$6]HJT0RCeQqZd1fsVW[2U?#@>[@R&MZo(2L"WoP!d(/A?f
oJT]-a%M9V9hfFW:EtU.?5%dCG"u<&SdeeYBgWQ_MDjl;n\I&oD>OGl<Gn:[\c#<?
7CqaZo?TXnQq:=PcT9IlS5^cBJ#B7erdp]#QPfNlCsS7$RW(-f`/0mS2;JKj1Uftm
E,W=k0B7t@qU9c3??3-&*;cjl/U#.=_h_i%&n]FY0V4Z@hK[r%DIYfgRte0sDUDgg
9UQOb1,$R_P;WkeN+3dYbW+a!3'K:Ea/8%O>]WWPDeI$ImZRji"!d4'T$Q*7k<gJS
Gp\PkG1^5Y`]ZLrNL-NUNH&f$]IC"te/*\AqU)!P?uc0t#mM@+ETi!!'MK`Rq8/)0
O$32mhVS+V^)C\5^]Hi_:tc7JNk?*<oFTrj)9ed.%DmZ`<krGO9kZbgrE8AZp0O$h
f$f$5Z,`Tns&RT$J'Jd-WCJ"T,joA=hbSaI>#E9O"_QBQmHKja3ZWXO2Zi8?lQKWW
Yo[rP[h`,t8>LqC%sq<)?RoH>3@t?2::=h>WcOmYp;#Z!$GR<G++87H.?b"3:shQC
B"jWZo:<EN:(P_V'5S7BXK]PK!DP'8"1A[oDoYL+VUChaHcR*YZ0]=IRCPO#?\S>$
:f]eAF96g*"W,*Kj*pmm(OmtU6\1'qHX^tBc>aYF5I4@^^8*:nid@tqe\Lb;Y#qHT
!+r^-nmYL$L!Y[l(01@b!?#rkp*Xj5!e$>c&-)b(VtF^.P%-Z9fP`@o[_gT4ZgMOP
(?R"_p2<:Ogp,9d^\Q.<WrWik-f-VfO`91PWiN9@\+MH;AVEl+`%8EiG1pYM.h2ri
CpDso)\;;?FTiC^r#k=lV.IuV#LXt0cCR"ALV9dNpa)5._P>%blZgNG#VukLD!teM
Y>B]Ob3DKP:12=_0/dLVR;k%g5;%C9f[7%2oCC'X8*R>Uj."2<&[r$^5.&II@/4hE
XAMB9"3W^N%dOB)X&0B9k3PTIE$R\"h+Qa<b0EU8hMDOuY(G/qFk0^ClQj!u-'Hek
"X2e0W'>DMWdU-PX"D(18tX-B$)32D;VHbB&UF,?7OJ8,2baQ)hM5a4Br9*Ud*CWE
$4AHZib!mF!fKQY1FiroeW>66nN`bKIWXcV(@c7Tp""]#Ta3Jk*6@WilAc,)D<'TV
f,t-a&$`DY=MEQ*CK(n].laEE&2sfb;%Dc[G@'oBmUb0]K+4QuJ,eBoeb00cD%-D-
Sf0QBCpQ)$j3S,<(CEJONI^lS1`FpC/3-a4G"%_0C=YpE&D/2rCF-29#%0KN64.b7
0HLLaeW5^nJ`WP:<b'cLL+*5#'/Kq)LZX\/a=N*9pCfr&o:]2c"3[%C@L3&Y+9^t^
JGR`@aAR&[LE%[GMlKo)3J$"(]Bu?'0ur'hDXAQ54,YDFi*iYqqeu"GUG+k;PgthT
"G(D;7SFLUB599c98^Nn6aul?=UhGm(OZqu69kh+*s)&4ooQH>=:[D-;2Zo,,B9Lu
NWhSYm;6bL7ilrOIkC>^A[01!lYI"mnA#.D>Meq:;Y*uLUPD*;rTHccfHS6V!h0_>
Z5QiZg_EHf#QZ)F*sC)cejGad@m/nO=pP-P0K]K\l:3?j@'Q-?m<71k>$b'^^ue"a
X9OtDGJt0r69kh+#6FLqooQ$2=:[El(.(7l$kIopqU(EJY]nlB7s$nSbAt8+V#t?d
iXLn=[e`!o;$8e:B)Bnc26cd7lA6&`!^`QO#cKtiLKl.GHH8sk&->1+GR0PaNt._r
id.,).+n"B.9q;oeKV5g!1MuTZ5V@@Mq.Lnl`RiPE%[Ubc49ih#<q'Qj)IaP1r*$@
*q?N;B6dg+eQ$&&2:p&uh!s7'\)&%L<5Vj*lPX@V?``HYS>q#+Hf#3l4ndN)gu*6M
3bQas&c!Xnq+/:]7AoXq5Q7p-,T$>s\qOSEY?UhBnMs)TEVtED:Oi5i,Cb/M<Vo_8
=P&$I+??GJ#QZ(k"=Amh=oIR2$1+'mT%S4AE]]XV@+ui'bl+gc=>?XfT*iUk?$P=^
nIT\LXhOYsJR_GW)#<sI59:klkb7c,0&(mN_]QlS4?YPAK]-%klX0[<>X6+EFt_ga
j,T&d55F9'iK?hd)46c*?HQA\>f\$X?;6hC,qQLW@KFZ/6&'6bfd7csmWii?4QjG!
d!TX(rU54X[blQ2JG7,:[b)e4MZjo%YVfV5pL2[WWA+1s5QKsl/2H%1qsDd`-&X/>
J,fBbcU[Lm<Vt6B`,_5VOrT76^@E$@6D+eoPgtg)S\R#Nhg=h*_`mta'/_7<9f5q7
]^Vd&_)VGhj/%<D6DiBgAMp]$90"^a#V9Tk@qP/fp"*Q37!7OL2i_b?S9)s^?iB7k
_kN&A)RXQ+mtMd!#e59>D7A?<1t,,3H6oek!s.7eLE4Bd^cHA#ntQ4+,_9M7_+m)Z
'R&>YkGWejp=Nlm4nm`q8Ygk6iu^dc%<;?d2nm[>9C)9AlS.VeGu*RKpYC%K?i8n"
iJV(@iae2iflp4Tp!eMgK*^hbMPt\%X4"NQo#i\AmskB7%2n*kFiuAGCj]kWer)2q
f_GHC2nc34.Z&0:f>%<-\GuR*_]k!i''>g9r^P[*+3)PD#u!gbcH(r/c9D!<SEM'p
pkO?9>Zo:CIJ2>5h`H6'Q25VQj#B3&U,<SS.B=O23e>7\DnYhpMj(<Of3UPF/OFJB
p9B[4).o6Zo6I7'g&p(9Sc:l(X+C4.LN5Ri&_NFVH7>L%7766Hn\l:TcT_5B^ms'C
lH_.;-@S/^(39>@c[9?+#jf4qc5V7kK-[\um^mE4r9$9dAt*YG-oND]msEsh_K4$d
(YCf6o?9#2qq#/$D;:;YkFR%?715H%0@sX^YF"fk`C5,Is1-]aCPAs>jXXJ2.Xt4s
[dkWD>QoMVkdJHE'Iq,TL1LEj@G&j,;5)km@"Jn4IH$)2)F[qSeQ'N5IeL,CrNC_L
C\Ygq4q[Zi[c*a#hK`Q$br6/8),39ee;\\+I2FnY,]FTc3\uP'EW0>FqH$%uN!FFK
2-2,U?"&F%!Z$dO_Pktf><0agGnmHDOABThW--<I"Y0tM<>4,2=NI+KcP#PGA")!=
-:VSdJ*X8LDR.JAb9V7c<FS2&^@Lmdp/K-gN*KAQCkXl(NEJc.)50c@`A.2)%t9TX
ch9iJkEuibDVAK\I.jn=:!@E2YlQ'En:s4JgTE-61h)ns0X1X)Ym$KTUEBGJEq@O7
2kIF+T`*W:h8Di_9T/W4iUOr1:\YAq^\>J:]nqlW`(VWYEFPB8pfmR@LHZFDgM="+
'%7+6htbQA&t=h*[cinlTo&;rCF7U%*q;eA<q?qKmthXJ`6>G!,PfHOF3^2DEQ/lU
4SW;r]((!c1[6d`[*p@66JN7[Cs@>h@R?U91d(=4(L.Np5hT1ABr0nR5Q?"VoW)?t
._a7-+8tCn*kgU!3mKM(/;\'N@Q[kJ87nB3`l,7%M6/lfO$)u(@M?).C%*fPrHaU*
/VGCAqUDDURnP.Nr87en4-)%gh3\Lq6O)I60["tN*k&O:h?+.)R!\83@iChR[TPp9
7V9+/3&)*BjIh,89"sqo0?&*m4McU+0^XO;J,7Wd`jG<Z,t@m[5MOa$gEQ%1X;DT)
B:c0jmE0'JjHE@+S8@e]o9<0KM05UGO*[a>Ilcl)%_@$fOsAujj^ej6%H%*G2reh&
QX+c+r9q)KDJMWr59u(;pa/I^ik:7&\gXFu`">KricP(5n!s=)@puijWr@A[lHK#'
mYoI5m(Ck.(>+qF3)1H4^]Et?6mDHX\%^tO\m@n#IU*>L&`Kn)mRk_".cX)`DH1C%
"S&eo;>1"^'YGPW&QgAjSn=n$#]*:Gl8c.[ht)anI\@^3[?\gDjcrnBCdgCJR]PN2
-*WIT#V/<ib]=C&P<"A4)RLY'[Xt&(R=LCC1t,.?o[?U.:l_Vb('9=QOGX^,'2L_F
&f0Jp<\^jhUQX)%5<\hshu8q/R<-TmbjAmqAhFi*Nif%rGAk(WVYH[o2V`8h`6<!A
al^2?gCG4_n;cmGNT:kcZ[`0uL'YKQ*UcPCS2rBGZhPG,b8_fsJcS`EI_:jkYa8X=
=X:B`)T4@)BoHQ&Kq<G9'd?Bk[\pOt5(bGF"*jtO0-1)ZZd4ZrRPm(Hjc+2+@q&XT
@_J;m[\fUnI_EhP1r>A?S#LHScX6S'f4(.=KAc^ad759!^[po8TDMlPK+'1VfU=]U
IYQL+Q"a,?.:$SWFlIW!SZS\X=n*Fb9hN&o^1J-&$#d"fTe+7nibIWKM.sL6ds*7H
c8o_di8)NcC!J3c[bG\hZtnjcRCA\d)RPVEIgX^qTLs68bb;\O"P1"i`J(uu0>4_Y
:t&=I^#edt07Wf@l.^4Jc*Y!c055aZk)8sEj$[:1?"`_@Z(+8L1kB5c'Y1,o=\L+Q
=QV2\_m&Hn\")]-/0M89hqF[NEN9#K8n0#HQdq/j4MlD16t!(p'50#5bI.06k^Vnd
?u>p51<1AU1k%Ou968lFTi-.BXKP)Wpu$da1n;oIBL=hc(-n>ql/^1aa2\&)i3`dD
D\Sg0]KDk+,X<\n+&X=(F%R/,U1#=/+#6J&+Z,5kd+;TN/]N?TV[4n5Gn,BOfUg3P
#*odCHr[iRKeIfshIC]bbg,4@BO5'+1]C6!-8eP+M*i?H0W?K2,SDXF9NhPZS*+j\
#2@>D(#j>mIJ:-=chr7fjd.@'a"&mN\]45(p=LUUSN7m+((K'1_b@`_nbbbGqXl=:
nn+'SVa(,/AjcOE`3ZC-\FIQX-ck\B@ucE?+L%(J\K6(\TeS`79tmA/-$Ynf_?+=C
;NMpt1%BY<mRJmoQ,O,%YQkq;=9tS%F=V^Mo!+QKfs9=W0BK:`TM9k1;lDSU<K^iR
!m>N7lTnmrU7,k$OcD*m@1AA0[QQ"Pf?SsrO#7P]l=<>JcEE_&7OK^Ra]Kcb"r<]U
9XE[$i[o:ciGOo\<b\l!a]%@beg+R?`a13.pbSNOIQK9V0_$1lK'`UIQ&M.'rE/0W
$#J0S/:s`N]X$PXWF%#5A>Rt_71X+?ZUWrBmJ0J"h0%>Zcjr-,8V&0,Esp]KX#8>S
:HtD;+,rhdZ&W:"P;PQJD%AaI[AIDLhfR=AUO5+*\3^*uXehCP18`g7Z`%8>&KWG^
gUllVf$51jML#6NW+819H6-M.+@QoFbj5g"jH,$:7dD-7!@GD+^_S3c2T`I6gH6P1
gRSVO(YTi/22LT6='X^n)qV_*erFU(SR^\KqZ&>P3s_Zu_'$mfa7@9d`3j_fS2;?k
O?<dZjNI8\-?QNrb](tFH91;tkQ$%ZZ2ah#a8#RRm2'<"!)`,O?m4No*V1HcP`pG*
6o8Y+`[!Pb(aPWe3iQgN9A4C+*TOa?k#h]u-dm0:>4SH6GliX.!XJ6g#NSFE%mTu2
j0n!Tief6EmeMW#p$5VToOY-'V?:l4$);:YdgH\#!m>r/@3P_d7!hLrbW/0eP.L0H
/U&8C'%hZoib!gVC=3,W/0RgBZc^n!SbH#W&_OHioQ^uRn6=qV$DAJkAP348CYh9R
+(#SS?4]Wp[?;ge@^r&,;9`U1eBNlL("5oY)CuT3ZYZ)32%o#dC'aB&I3EmJn%O.U
[,O0cO-$9bH*'YIK(dMc98M;Ao&6n[gT-j3PHD>haR>t/N.I'8a<;];JXpGFH/e`_
^6%k<:]3>r+X>*#=nHgA7NsM>1ijqHUMXBZa'u)bNRQHL/<hd!m';a5ZLH%^M00E+
h\VbdbMUF1MDWsTQC_H[/_iBi,=,@uO"_rsP&K<5(QR7\a?OV?WR=m>]oWhU7>II5
oR[cG?s2;Ac^D%([7_1,@\26?H)LOGhP,S%>C';g.1^tu<Y-PABHC>)Lb:?3Ab?u4
Q4@U1lPeJ6JP*u-qFjD4-BYSgJ23N8Y\0<9/a\-c<Z&>/QrBci@dN!a&Qh,(.-@!G
YYOugbs=rN=0)$M9jlXY7@_rZqkK04.c*)pia/.P/"/rmmH*5=UQ)"YFAntn?^P)G
nro]9n<<s2ZD7^N-g=d7ds:61X%^oK0!rtl'?]GrnrQ*`ILoNq$(*h1-p)uk?S?Qg
7UZ+UMjlg*U4S`bYBe:IY'fWjGq\9\d\)SYpf"+L!`bDYNsSsIV(RJN:-1%F$)(\t
nH>pQYfpOf"e$tDHg]8i&b"",mu7"hs1D]TB8o=7DH90io\?a*n]-8d,B^>E.Dd![
4P*qirE*G'3<K0nW'=H`6FT#M@SIIKr6ISL/!5er4*;chN:Z4kfkJX.D?L^mZ;BtI
gR_1:g9#h[jH*,pc]bd#l"5oC*m>Rb&W<gqPQ:1Rm^Y1fpY!a7]sPeE4gNjQnKKK*
Z_m#"iT>!geQN;q/?J/b@JJW!c]&(9QhF@SYn1`fRD5I`cRF0+3g%EgT!?n)Pp%LB
mG;?6+;uY/kg8[hR:mDGotHd%B]/0A?<)!f940K&Ka=KrR`dB<JURFMh]>KCrB7<b
VLdRB(LPtmr8$gj2]X3Igtm(p/PZ!7_?qM<Gn=9d8^cq3AD."`5QFAD5uaP:Qj1eo
hgFs<_=Mak*EGc=-_,-BHj:<$"u@7pUs6S"94/p8P_fE!*@Mkt1;V.aR92NF@-EfM
oJ?O6g-miIR/J^Ql5%1)M&!)ZXhi8iJ,.8p2BIE(Eat_<CWKF=QZ$2u@`Ajh%)1ua
Rf?,.&8`]TCH1urnqO$4?sZ*F-F!Hi`<Sj.fQ:LF7mGh3m(ANN?otdf?HVNoP7sk$
FS*+;"SaS?=+u`k^et]O\59*q<WNsbdJ0D4_CUj=9&ee/+Nk@'2es]0l"3@P*"SUA
1qHi+pnDPM;6O&:,g*q_8tFF@/ge/sV@pJj\JK%ER,EJn4obHOa`Q!+(]/Wq:S-&t
/"!75W;XV+a$Vce]AJ)771H'5can;#?T1!PVHJR@%qA?rCF&Il#?F#9iZ9'>3Mm*6
A.o,73]KE[=(I#&el:Jf='=*FjF\5;o!,k7?R1U%r5O%s5?/U0WAF5/YNX>SMI)BF
U=epY2d`800o<k0$'&0@$g24Zq=K'F@fGB5\m>9JU4K@LH<%p507ifH0Jp&:+YSD#
["2.:%G/C)VWH)W=HHt!dK=+N=f/RmmpHZ]#6l'o2u!!mM%?6-VR[+W/EB&%#WR"E
]Ep7&Gk:$B3j@$;q=44gbRB`360P1sKp5L?+2C$V-9%=*&D/L+*6`EN!RJd@B1915
@,DQs_O+3\aJ`<nkVCed26<2(SG=6_.\FedHL8PnH6B]!+]&&_PprRre/K9OTF>_T
I.+cC`ok(VPrQJZO1/JP1@M-q$SoZ\1;O8@D'^4d#C4YapELJ$7\hc*D;"F/@Idf[
RY?Q8ALD@rq)YqT?HQEI5oUg>;lDSU<K^iu!m>*r?OEonNqCA.(SU;k&#J^.GJ@.8
h5l`php%%W2,/PW=k6-X(u!9@am8?F4J^`42%oA^#Y^f<"I;3.R&1M-e[ZK3P*fYB
TDNPWcnJOp&,'ifWG(fH$b49=H*RB(L,)Nn*QO5CJMI&Vhu7fbmAB@.lIS`?9o7Pi
+tS%$=X0'$*VC+Xer@I#mf=[-p#0K$@Yt?WXO,4\WZ-N^YqWkq69`nU[d&8KMq*p]
?J82?`^8tWFld\,U$!$=$dt"ok'cY#f$j:BS*3G]4f<9A!eGb]X+X0(o&Sco'a\%a
e#Flm=TfKr)9eHFL_`MqM]OF4A-E19f%%=4GaS8V'+P"UJ!a$ZM/a%r)%<b9H0%*i
.,%ucl_@>#)N74>:=[U80_=8Z+92,Vd5*MLq86V@HU^S^UMgG9/pKhj%`tP7K1nW<
4SYSjU]a1KFHjFj3A$]TCTb2pI`E_cKC=@;/PK=jj1I`,bUOe3:hEDHd.S(W>`$?[
"Gl]%$SE9WrUG!a?![&\_lZ\M9u&J(#&F3W]"tC$od#(XEm$$N]`>Z&Qb"t<ASLQ&
euomX6M/'FaTUIdB`g>YE0?3k*m`LeM^8[H$9YkCfO9QS^!_9t$UT2ZXYLP'*.'Z=
VLM8E#"@BY0+]IQjO^G;=Qj.tJopc^0VC2Cj`h6=l;i'TP"p&Hjm1FAWC,N_<b]nb
6iIe"NBicikX;S;$*d-UI@e0^e*j-:BMWX!QQArNcb!=)&N>acOf-mS8gBB3N*C>p
CQ1_B\e3S4FnRSt/ds`0lXZ!.1IA1HQqoD[@0*lD?uIg\>l'MVmEhMIcc9IDTDfYu
E;!LZ$Jk!67h4eU]ta!eU8OJ<&p`RbYW1_'\(k^.cQ\9#:o):[kAJjMr=W4'1lEV1
')B7Wg2/M1a0EmXf<j+='Y]paO7k]QH9q+`a#n@e5QCZ6YaFq-Qn[4O1R]1.fpE:s
Sp3:B9ob:M$mndHrpD0?EKnXC<Lg?#/1.1,Opfs=9efbJ=6YeMm0@Z&k>)!-=C[>(
-J;-h&1$trdPcs.$6;NemnCU%[^1j2;%JM&4R"iQCh3bS(>:g%%imATX(Z$L@nMNr
,f8"SNisS"L%Gl+TDR/?bqVZ\%[%Pt[)<MO4>Z#W%hfi;_%FQCLE@QX6UAAqLSba5
aPLu=Tfm7Q,U,tJ"f]J*(Lda^R%*'B&]2P+22eiNikX6GPbV0M*\L5A8,<Rlo=uU]
Z3PsC-lU7bDA'rNH0X">9M(G5BB2Z&Zcq!K@=dSm.\Mct%:]$SrUnc4;_O`I:rd<3
U_7Je`9`ED);iiWVh6Y"YSXfV\UZR4OU$BoLh=XoVm;q@lD^35ldjAQ[\##Yg5_fc
VJA%$W0/.l&m,oCl(?[h95JgFhnl[s?0Gm[`-_-ki7H).aO@&JBP3=cMftXBRjMp1
6ohgjfPYj"`L=a2S\B!IaX.TQLh,55;`[[cc^dac)5j_plP@(^097+$Gtce`VjfOV
Gr^FeJ^jko3ng-/,B;TWauQKK"*5n^J%FJ31ToQ8WOc6B\HXrt%amekY-_SS_:C:%
A\GIC.ZK/3\ZC7%kQD[i_[o^p*)9$:,SOi<n8tO6GpZ>*_8I1s9TS)qlL+eK6@/j8
MGk:AV3Z3uR,[aYk#m%QR\-8#V2[eSn/BNH^GW6ib%b:p@r72m))9Ye4Z&7'q`<CL
"<mLLcdP/V$/m1[lA3PFq\31]Kb4+]aSlNq>O2A;n2Y>0jlpp!&g%Rcf<\br=>;-#
eqJ]NBg["44C2Q+!J%JQO4`]]Ibsq_Of@Mr8J!XoB0skcWNVm;>F1\kO%^QaA;Bk7
:IptXHi/?RJoq+Je?$+,XmDX_?h:XGicZhbPm6WUp89N!?2omLQ/n<$@-LnJ1;X)=
Mk5l3/C_+C`E_9d_o"Sob7)q]E6VmPPZBtY=V7LZK>=q%7Nu.d/!qN^OVfmEYb_/"
(;DT=-02%H?>G^k@*:b^0Z^0Dd##Qt/[tBuJZSM8e?>&U>13W'a]S2F2-;qU,j%RX
8:I>uYs->LM1o@RM/f-JeldqZ/B%EFgfj\pel9ANgWm[\O,lq<,E^#ml`JdGpl*4a
7;"sDp/@fmOF!2BNt._r@_RZLL/i[MU(@jbqA_BO7pQ)p-A,'$nTsKj4'g#2%\_B$
<#)<S"L_(2Brqc39f1$rq`8`3O(Qr`!4BO&$Ju^d(jmGtm%&j?-jYBA#ZPNbY%iI?
9a9YO]Lm4g,-YnHn80:M$=T(6Z!EG!%kOI7OVNj)gJlVumlaG3230U-mrYiZ8uL@e
8qR;\G*Yjd[73K>K%[;2q-_=]p)<[E$Z=0E=GZ9TJX+iU,[L0:B=;Tc8)<h9DP+b"
IC$&,D(6++[.iD-3;u(%9KUA4dn*moA'rcI)@?">Ho&:VclNkX6`W'WpTZtnWu,n*
#X>3j\Ar<5YP$VkRYn\aZZ*g[LMO8$Xed/E=?p7gL"7>7"I<GK]^;Uh@j1LpWulc-
IhK6_o*,"Ga,!2'o=`KsQ4_VS%5F4f@kcBO@&>Hj-K2cf[DC)QJn\\HFgs.@g]&%*
Da6"M#:$Rkm/=Pl*od&bqDX.7UQ96pQYY,jZIQ'bVG=s.N2,`UKe:r7Bs$K1>-VJ!
P$lRdJou[]3l#,Em=O_F$+BjgQuta"<P=O5^pJs7[L*-^fYKW=-oYA$+3Cgg:nrSl
3U[<PN=P)(+kXRNCrJNh,\/_=f;96^m8)J9B5DKf8WK[%MSBPJ>_VRRgTF+[r+8X?
),-gXFIt5Y`MUT_[XBFRib.aA:PbBXK6\AL)]8on5no7d#:%>b1$S:(.1t#UrN*f%
7QJ\%.2XcF7\kZRd?tQ2\Y5S?)=oXn&>.]XZXAZP?lHBH^6*qR`'&X+/b0*ENWe+f
&tbSg;LI*)k/9=8G)83AS<-U')gU^B)/VY_R'X\<AuZkLqsPcLF7\W-bFSBus1Y'&
M6`R!CJ6ZK`l,K7lB`fPM(/DtN]E&WICKm]$$_(9JNfVbN"P;&07OpGCnWrM8/pO6
9Q'fKgT+IA"`k+,o\:4"@XI$]pdUi?S%eq%qr=1SSrsSjf3[3rC&!<tl&+ku[$\J5
L2QD![d1lhGSS4blK3LedJRJ;"I@&@-543rLmhkqUm@#HJt!6lJEHhl>^>FrR@S=Y
/tX<&KVF$UM:Ult=UhHKLsA*N]YFO0_9U44B'/)[CO;n!2NNR.**'uS1GN;l2WmPL
U+j_)2^];Z&7KUqB*BI*#m&a:P@+nP@bSu6IiZXH<Vt7-"ETBQWfe>`&_J6n=DHCu
&f.QM>A^cUq\u$qZ>CJqS5D_,D48&5B;>+<M&'Tp3EV54RSbQ,ate8KLqs!o-:9/b
'SFprgIN>d?PkK@DEaHN[^]e!2TbXm#2AnmT::+!0P;cLc>_"XW^L69_,T+q8\Wsp
9*be(+]'6`W^M7"K6m&FWKJ6l^nQ67'?Yi[P.=J]6^=d9ONS5+*"gE:;QtSi;<qom
@)FCVm5h_Q.b(SXek"_&<^/VX"I9C(2Lqb//*l>_Md$hr>#\0-Cf>W^O9q%QDMZ*:
!7L"F=UhH,G.K7.KRaW4/HY35lQOt3aV!"?K+C/U!B_^H-iiNRWbdZ*B7C0XTH'4T
&D9q<)H$7;2!Xb7U,<RNQIV%V%"[fqE7k%uS$%Aa/(#eLjtdV%9NWXs/?==ra@J7C
J.N7n2+Kq1BfuSM3S$QXWeCuq!lIBuXF>9L"P,\s#!;]:Y_aF!9^Hi>#uA1KlC+86
)=6/1>^Kd]dh..J73qbW=UcoD2r,2M69kh+(BO3,ooQ<:=:[El(.(7l$kIopqU'j-
=?A;fn439EQbOO&Rr?%1REp8X/$`5`IC0>s=-WQB:f[\a^I3BH#RCGS:e_)BT2nm.
Xeh='>7o8,+Wpo@5]6pmeW131^`I^TEP]q>MR>\<^]WVG<Y=!@)FGCIbA(ErPZ;E)
!?iQg7Mu7"VkYf6r+2'3o4+Va69ke^JLgrHl:2(S?se0;L%,'0Im86_j#kq?n%C[H
Zd1gDjcro=E4-ETRrD&O$1X(+r*sGKZW]gapW@5Y"VjhT#QZ(k"=f%SqU<TCWae=@
a,]ZQTb%b:6D,h1AbDf#-a9^1jZqnas8Mb$l(s_aIFS%@`>)I-AX?\':7N5Y'`Xl.
#$-+C7k7"<DeDAU""s)Pgi?'f)Ad'H8=f@13MbF@?hXgWkhL:/:#V@=?3uNC^3H#\
Y.=JX5d1(ipY0W$YiCa*`j>7@RX)`;JLTbMcT:BndJ;N9htY1t3T0T.aX<]s\rZUW
\%hn/:&"G"@H",SE_9GQ_$.^l>AQ%QH!*(>>F]b^qsCl5A&ZU5-_9[.B:TbsSD=:*
N71N`XaekY-N`R/Ern5Yd3QaE(QaM%"GFS3,>_E*3ckGX%f&?gnW/6RW#&cbiTTd1
?+b(Lji",;6N;L@<WgO3HZ`iofm@M;\Ror;O)qUTpY@c/BU`kI$"oiTAtsAS/?hB]
=N3'l"O8sgSA%5dktgh26jp?tK+9pjINRW8/0$S#@"VR)cDIXWprZ[P&s&&tp!m,R
'p`3Uq+,+qSpK\!.\1tXa^KrFG%eJ-637DLVo-i0p9TRs?$G*>/O]kd/B.5,59C\.
0"L&+n@nY100K7/j6:$<p6kc.*MaRr(Wa4KG3Braor#K52MuEDNh\!;Pt;5eJLVg>
<^/We!rLH=r\Sp<7K^WJT!PZpgiLg2o:Q%Fap3pV;+DWAelZFA^>pRARh)s5)Ha`/
WuK4g/;/f]j?9.:ghE[W_Tk73*&Uj=*d__5kFR%;@Z)fRm^V;;(_(LCs8;Hna=g%P
IJ:A2NT:,g1?\i(?[r%IE9jX8L.)na1iRnO'a&m(M'nl3%QNBsnB<]7KY@*5.r)li
Ek^CVlSY\qAeWt9fST">1XFj"iSa.9muFo^eR;8WedK+:6466Lr1F=skBlKnVoJE]
!pb[7G#a%G)d]9X>B9(+17W:Z^]P*(?H0kM"!@;'j85JKr9*S/M_@!&^ZeI2$L`8d
HQ(f5=OArLQhZ.%jH2qR$/b[C2bVA+0M*(;q)DM'h07b)d7V]\`8'<]+8_FTeMRR5
V=gUlca9TXAPMs+cDcmi1CoN1D86&CM+nZt4'F"\pO'K>Ah(@]`Z+ftcdV-XP%,>3
3;"Y@,8RPt)M)`t^rT8[<WnD/2BXA'bqr@XCZHtRoqRR3]():$LE1P?Hu>ahl+Xmm
6bjHAP1O#eXV'5%![=3`S8^gT*Zn'KS(O>0`!5k2qsD*[r:%TY*Fq4pYf%/I,c6,5
FLI$o9ZK3K6tP;%f-*NSVfe)q3T9bZI&A$n)-eb0)bjer0bUf>MLRSBHugNRZg^M%
X%WV"0OAnP<?'6p55='S/=@F&D4roak<K""GWs1ZAc\89\P=!VWuR#8I*.[&M(Ng>
q$_:;1k.L,]'HL<o,ZnZ8DEf\9UiJ-6re+36Rd@brFkE&2I;K>#jg0Xrq45'#"EWJ
X'CWZMgT?uCVh@H1p`$QYXDlG'ikk8?*6?'U8Wf33s(lTc6kgGM8]*j-Dp1SHCU@j
C2EonbZ*`rLE:aifjg(+'%7UCAmV*sp[1S0D)F#PIC@8dIeUIm[(4:?htbRYiue;G
@V75>G33iC9UlJC\0.[GeZXEZiB)P%B@[U8Br@MfI-<p>8m4eD^H2Y#).o6Z1%X+P
cCD`?Hf+^,ZIDcF`K'mi?i!YUqs:X:-_5?W9L%h`YE3Ie'3g;hk+-_QjMN)=E3d\C
bP7j0/+rBeV?[M69^\DDZmgIT(]"orGfTCOF#2ECVOMJ7LpO2j`]iP$#9WTYR9*UD
O7C?hN&/aMbS31&9%u#Q'`SD&pd)4^lDqtI)-@K;n;i(s,<>MRF(8MMhL"_01r>)P
L*X2\3ao<`0^nA5T4;>CB'8\*s-?o1adAE/a-.6==<Yh9dnMbq(sL0fK*Z9\"FY\p
J(b]T,PRA^fUk\WYjZni]/!`*Sk%\Qb:^C`rbf@8[MYA$@K#lN:KWR/."1T;+,kV$
IHE58q1_FhrTdf$,O7\f//iT%Wsk0,3[!RC@OR/GjNj3aSr\,aFR>#P=oIR2#qQb\
'j"Wp3W&0L'6=p%4"DfXhY4`CTi8T'rqk`/OQZS(k-BO'/?\8$'i+_LX;:q"pY9g;
TDe+hgL`hm2j;ggS^u!Xeg@`J2I$*=5g1@2Rr#B%r!j<L;IF,f8*qMkr8JO-)"W>q
ni]]B5PM_7`I#&^1D20<^klR`qMk'Nl=d&%Oeb?dd3)4LrUbq,(5`6Xph'47M:FH3
9Ts;)mC&/(B"d6YBSbDC='_)Y';`XkZP)#"fuPiF!J3MqN&/I/n_&OTI>]W8m4]_*
$NuR5WMZ+6/qEc0>Y,<4CX.bLF7L$oVsLi63?>6dZP-I;UudnH0!RRVO[t'-7$;NB
AXCC8Mh.Gs5QCQ*a0a+P37aG8$h0n)&9,#D%#3PI5_Spdp5-:U?ma[Ndn`1KdtPT3
!LRMkH'4.Fg*kt*4"IG?;I\B68s=l5CkTRlJ&mF1Kk_hT3VFi8Fp+-1P(*AX9.u97
5\oY1X_:nqe+`PAP_&Wi=s\a(#]0B]f',b/rFjM%X;@ZS17@eFRNG>SY>!S$]^WdO
And9Ei^B#f@Fk>3mWk7l^st6/9(gpCne,&GLm+3]il(Q7[`o/b@ZH/r53KaoRr&pj
0/q[*6R*YCWpLNsd*NEPpd'R7=_3ln*V4W,#AF6dbV@/VHOs;rp"*Om^H7"cbS_VD
n*k7FqciunCnu]<PuVN^UUA'WQU12AVk2'(%Rf+T`3!=</EB)=iPEg$NnY!?He*?*
Xga>`k?W$es8;JpU.#`6a>WQ2s6YCO=N]p+Ckj!N8:1s'b\M,Bp2#BN!+ooe_%9k!
^ph#TNAR.Nd`8n!ScoDBj79$@TJ:W,NWp@14)nB\.n^@Y2UC"@V/&6tO:QgJeODfE
lq`)t#V6`>N[\!l?i/R/15W*qRUnqJca`[Yh3,f.M6tsaApu<UC#Q[ZFr!Oq>B\hF
f@W;T`7b-pa<HNf0>7!U>Qi(E's0;#U#tO7@2W%Q<Dq53K7f5ArE:M07R%Z"][t7T
M<AHm5m.sVHOp+Fn,:MVDtH0/H9o+Sa'PA+[bG\Z8K"CZQm-">LcHLO1%@L,o[?6:
43MYB:L1,e8n8?;c9kt_4V0bIA%M_<6p'QM]lrqmE[!$XK0?H2'5_,<YX\iF?NML<
G<-=<1m#Xq!c-Y:j*(bMg-5M_*-,W*Y7i[uL*!q>K;gVZ%b"]70:mUcfnQBOdn!ij
'5o.7QlLH\;F!G%!r+b6B#&0u+J3>RWB6n=/#3DcIr8#Ai]Cg>I=^<\htiX'N`S<*
.)nOlN-R@-TUGK2M[!n+Qm8dOcV<PLYkE:N]%.l8jg*qi!h2ZlpWppL5D<hs+?B-C
^NKbR7mHiInqA`E+^n`YA%V9N)c+PNP8-eQ1=eSd=LWCY8n-"V?A_`*A!Vmn<_6C1
;(l9]ADC]m'`Tc"qUMe/IHIabCm$DnLKG23[Rr"fF3<iZ@_Yr8UsZA7).R,;X!H+F
;[t"U+P_>5hg4a0G(-4L&_7?<$UN#N(JOrE;if+G-IlB"?9_LEDeBpZ<&jR&#4`>X
h07biUXfu.(EI!51KH0"S,T8k/=OCU!^#:eo>T6ehTJ8o=YZc_3.YWQM=2"OXPa1_
R_X)nLNFY./4bm]-HW>QG7"meij'Y`^48X(b`D?"#!5M8ds/:7b:5`%gj/(RXcMIc
YA8I!NtY5]LOJVTH]-@h29;T>?7PM:'A-N,\L$**'3I=p38UuONFGdg"P1[Nl$D$?
Q@fHZ>*?RK7b7Jd<#Yk[Ys8&l,I$F^YcPZ-#)qe:dikn0%Ia'9?8'k]^?CsPHX!V8
8=RS,-a;F.P).FB&*e5`72PJO0%-1Ir&>J(-'OAnQr5`;&\i._Uf\K2<tsd\mS(VM
M)+a6;9#!UaXW-hbE@J`/EldKb3DKD*au`)rK,-Mhr2W#"M:<#]tD$G5$i.5VuGc5
NPIkOk]#qQQHTcINs;hZR;;+]72&c-E^D:-FWpud9*\/!+C76^V28-[G?@kcgmABQ
:7>j;XAD.XkbIAnRQb5%9cWlj1(h<SE%ccj_RtrIUNXJ6hhc@,aiNf%NkjZ9R(?ZL
Q4?[RR@O)KV$I-\[\!CL^A-^9j<+MnQ=THVeXuPqfdOQX3VFhc49Ut7]e@S"]V!f5
VB>,i4H$e8DlpFuC(T$8(.Q5d6H2"L!Jc,;B&/V!D9[aQeY'",]KAVjSi%kk_J3DX
,g+Ss79S39DV?RsFN]i"#V>35*m3b<8"RNMH"+mcF3^1YIJ),7Ye@N8gi&G-^iC6a
U(KI!=<(=K*lPc]%qlL0b:G!J$ta2$dK/rb<bA[)56U]:HgcrIkKlR,D'\B"6%30o
<W[XFmC1,[E#t6%Xi2_$-F#abmC1u%NAS8\K..O^KKS`Vm1'Z>SUqAI\?JajFR&LY
5@YuTZf=d];e+n8/pL[V&Qnb$;@aa`V#t7tqj9tl8RO8_6Z^)^c-'.p*(42`P3i.R
qU=:U)oX`]a8VltQbYr[cpY;prhX[iY]R1Fl)/IE947:5mi#;8ODJQp7%$!kI.Q"R
V[4mqqB8i*_P"#oMSS#fST\LP*igRUk\!)C7:;ZKqcp-P3JbJZCW2k5Qdq.W/:kcs
#u4?bZr2/]fZjq:Z;8YY@$<1oW5%5M^uD^-9KC^l]e95&C]Hsp@2=b]&P(Y2Gl)Qp
#31g]e(QWm9Okke+js'u3VK>EATUF-`+O"GT9[DG0CLI+pu9[U"_L.2b1slR/p1hR
YbXRr`$(ZR%QGRPgV\J>8@XlCXgZr@W/]0g*=+4l1>s?`Z:k%30&&pmjb"479Z/sq
('Yo6&4Q_i<VA,oGBeYJ1Kh<ORVNQ0fKu2"UtfZ^ioNjL$%+LLc8k(+UlcsGnaE95
]76>n&Fe]'Eu[)`TNp8FCR*R#`BDh#1K`*qSp^+Npt?hhn:u7!&TT+\,mP%7#]JW#
O<K)\eODfElq`(U#qW(96(e+;m6W`^R\C+i>:!.<1kG%+@7:#Eil$!](4t"JPS4j+
-@@KUg+%rl-]<7/!h74[M/j;!?sTgl<>(uV3JbI?G^KEk<^5=0#jVZYa.,*74%s8>
Pg:[nc\j<;]fbbm`pkm37XWEd&5N014H%!a''oEW*S9ou9r4?)V!n3D[F\_HZS:aN
jN&.sEV's`NkIc\:3-qe-hbqSRQW6'IMj8V0.HYK[t6N(pDBP@8=dQU("*2[ah@?;
*llQ2HgS4\:TZ]B65,/R$4lO\iAh#Vn&US_"rPE!)VHt;p2jKASA"4bMHZYJG6fh_
"=#6%&9d?(%M2a48.gp%0hduQN8"MHKa*n=&4pj$r)ZEPpF$jTGVOCEJ+18N1CFI>
^cC(\_E`K2Dk]P:XI-s,mbsRsrE!g#@#lu8R.LppO-r!%i]Z!!cRArO7>k!.*(42h
[>95)OWf2]eODfElq`(U#qY/$0nF>@?0Glhdgq$&KtgA`8X(Ss@(TPY&`8EY`7+nf
2XMp[jGsI>XF=7k*OJgE&X[beYeK>VaXRUEMB]9=X!H+F9+E/MT\FfAWup_SK_9r(
'#ht?7m"QW(d:gh4OR:Cf\RQA05ii$]tC,M8^q'u*M.OH4l@m6O%!Ig95ANqE-Cj8
FC!OSb!;F;Pgdsb5%hQ]B?(fqHnfA,DnYhp[ekY\dt8>jE2:aa>3#)mZA<;qHg\El
C:LV0E"CE%N_&B"?G#qnh>d)=s."UNO_I2P=VN#b2#"\:IcV[RgC).;j/P>7Le/?M
8<3X?/W7D"k!7W15Q(#\XTjs+U*JOK4lilBn[O&8a1<RX<>+Po#qXsq=W$[V_[SP`
A<hVq".k[h*GrCPVTFAo*Z,\H=U6V6.]FuCMm,eTT7/?6\lg>ADHUukJHaldK=Cm;
hsC9\:^J],&^3Vpj6@@q]e6te_GU1Q!o$k>PC;`+:H"b`HTt.*>=AsJ:JfbmC=r2u
1MY-u3?M70E!V98:(D(4Vj##:<8No\qiaD`JOSm\AIOr8"Z,o.F%=E;Zis2G/"1R:
d%pANh9sOtM0pGM=S-k%A7:.D5.A2afK>0co70F">Mo;.`]P%H+Ubkm>:#Pc3=Dgh
D!KV%$!d>7-p-n1o@d@oO`$S-&:k#DhEtHEkSkq--([2#`tRL%`\mKPXV#DM.+hk2
@!:kP1bu1oj7a9h=<Z>e,Jd(G_@]9X&Sr(!bg\7$DPrud6mk1dZ'q5HXQ;7)X)R>u
]XH6,beu<iJ`jj3jT[La%6!GCQH5.sS%4!PeaHoC>Jgh%]F`:t2&MGr;JDT+jYq*!
Ne7e&_9?nOXk!`H*&L16\&&_2a()rma2,uoK9=eo)Z/1$$dYd6$*$4lLO^\kroD.J
NBY;Slq^0&5/hmmABs@sbQbC3$0F*/fJ\UpUi4-I7Gb6Pka3?"3+XrtSiGSO*fT2M
Oos`l3]urN'B-LbSdPoXZqqb6e'H`r2X?c=c5D7sT_M#>gBnSZC=Z+ahR9O3(h%<K
7,u!a&I%d(&^+b?m2G`RI2F<nhuq?&N!ajQg9(qMqohu1dkp;d#/.C-aiM<rAH^a3
'MNkF/ri,>6(k<.FPm;Q%Zh1_BI.g9X`^4\k*^ji=G6S>].]<IgJ\l_Qs!b"4^c,"
9!l=\ot(KG=,:==Z5QiZgoDBP%eS\3%rP?sJXQ4;Ku!/973XgH4Y453ZE`0r`_d$(
*BDd/g0cGEOiT;o:adCdF!qe@i'!H[WF/K?r2Zt\&Q!tG';uM(-9:cITM>Wu^D)Ip
enV7fL6Z3nj23<3F0=Yu0JH9\h\X*[(BaWB_Vbt:JaF!6ZMMt"'3J;fbT&Up?ADpc
#S@M&/EWW`Qp[.K6=Y?F_GX#Y'qE)5#MHlL&qS;_?<I^g?g`dt"GD::W"/sp:[9/s
ag"&j6=><6PFi!LWZDgUA<B<t]^sG'?Xa+dMn/"mdnLWpYARH\^%LAi'd>a++KM<s
8-"Qu]C*6\Ao>mQK:QHo%;_*".'"F13.XfU)q,3W/g:p3aK"WsLn1%AC`9.dHnMIN
%Ard?70j/"+YYq_W';:C=\P\<P%0"*ffmA_hX)78Dm7%^_&ORT^5qgi43fI_]uE1K
7k:8*f3a"QMCYa'iJ>=1g^A9,66gOe3:(aB`cljpN^-bGkYMSe=8StpSdKXo7,/Hf
kb<u)]66jn>Q`/*5/6][n+9\%?_r=u#?=n9/77h&,m8mO&?$*@l;-^h9?FF[E`=WD
J.NP=!bM&",=,]XesB]h.9pi."d.$_=clQ+bGKHQ\_&VuR@F3Sh0)j3fQP=mh_2$]
2<U]P69ke^JbgUarj3_%Q5o368(Bp3#_CqX:f]eA;?YS0`=q$k.9"*_Vk+g^gG/S;
jb;>!.fNUP""V*]8l5j"!?j/N#cKs.D>E6ES`H.S.E)r%69kfe,>_E*3g'Ws+i*so
HP&7"j2rmU'S1C79":2;^e-#TOq[sa5R<<*!pWQO>!0>'-TU=D8eHc-&.eo2#aEl#
N\l<0,RuiqOEb*n/@3R[[rPhe6C\RdZ5QiZg_EHf#QZ)F*sC)cejGad@m/nO=pP-P
0K]K\l:3?j?mc&g#])]sb%b>[E`Xe8+9[?_I1T5)=q=b.NqJL/C*<_5_!hm`Wui(-
*M,qp.d+)UfLT"?Kb4AQ5R7bu!VN>m!-nQI8<*cP=]l"2+])qWb3DJc?u+S7nlMuq
#+!",MCA[]J.SXa!pWQ-a*Jl$=pP-P+9X$H5[!-@#jgX5;Ob/=C1+FM8/2^<69kh;
6pU]b:7t'=RcHHf!`JQAJ.NQC"Np""7:8VloReT#=Uf1$V,o995R7XHd6U%rl0-2t
1*r&&-\J#I'`p]e#_Z#T5:Q`8eeJcFX+:R`+Wpo@^pkP\rj3^ZQQ5<78(Bp3#_CqX
:f]g71P)*3Wi6'_Zeg33r=)dj4BOZ-9K<nk@"DG*f3a$@F6#'*>#k_EF')Fj+Wpp-
&-;I%oan^q=:[El(.(7l$kIopqU(l@m&[P=)P26:R;gVL2hdZ3RV@#&jN./-kFN&S
0>2Jcr7Ip>IQGLgiu=hr"ua2OWocW5#`L88l;-^hH-*<4E`=WDJ.NP=!bM&"4VQIZ
Q<>Ptf+Un=+fr'!9#F"A8'Y1AF]I(.Vk##g^%')]F1a6A;9EW]j,9jN/d-jC\0@UF
ZlYBs*:"b<eNsNIJ`.bK<^5:oJN`SF,K#!-m2&f*@>/[K8LFrXOW6CMYept0RVT&4
7iZM:fQZ5$F1a6A;9EW]j,9jN/d-jC\0@UFZlYBs*:"b<eNsNIJ`.bK<^5:oJUR7F
B>Zk'bS+<-iIu6p0unst='pB#W-$++b*4>`O$31Bdn`2VGkBBR_osp_g`a*IQ.<['
X:PpE6=AR[:k)XZM+`m%OJ?P6"GFS[&1FS$m?t`k_=>Pf+*Q=KQgiS8^,;RG*AnH;
Gt$cilDq,.Z=6;)cl%D?)Hc0-oi)2&!?k9("Os'p6`-#V4liPF#QZ)&49Wgl8,FL7
^p)R2]7o:*4"__/3Ut*.D]BNuFO;f&N&(t!4#,THs72MkKY-Z`/"D+gq9a$2bP;+j
3tE_gMQRE?s!`h.'MqX8+:@<u6qguR7)a\.!OEWo"-UTQ!p66Z7\YbIk(j?m##'gR
$m6a]&Q(hK+=JQ>[K$-Tq5V3dg"GV]R@9\Lm^LNqRHa,H\"6f.[r8)a0k,g%OWV+?
PcB>scBWTFJ-8CcGm)ck-:=]\@l!\t;NLkbP`J)/g<kKm=J3H#m%?XsoQ9*`TrFJ:
V@@%k.n<pHZDm8LWF494kB.C[!>6N+r!8s:Q%usSN*W5#h:3Yp-NOi.07d$/UI@2I
5_:kuA&jU0P:'.,oB4HOk;D)J!tNnl2JLT-Fm@IJ<E)q:c"ipDePrb8UG4_7O8oTK
5W&[Zg(m^6"tpc`^t;*@Ys<hu(+THfc`pA<C4n$9]dqff9oT?Z:_Fn%OqB*B"'77/
R4nr/5iN*;Ft)qbAH>AQ"A#3("Di8bdXa!T_O*FlO?bc+o:Td/JIBel+\7+d80Btp
dk54HbGumR![L#4;$km(^7tcLPrusH!""mKJ9atuh8#:L?m\PK,X;DV5QVE-TUg3r
=VN`X!$0]g6ju<^,Z&4W1p!N#bk+JW"A"%GdS,172U0rO?J4SY-;UNj&ICEeJ;2T7
Pu1p%+9<)t!J^s-c8qaPMAf*;%W!O;"s<pZ-oD#Del!/nqBS<-,X;EF-9sY^B'gtL
luZX!Vc/n;"Ip]%_s3c7-nksh!""a;6Nh(8*E!YA%4+7E2A?`*O8oTORK*e4W<kA/
&g.2f+Fu?_TUef`p6/R$3j?`T.8*&1c4Q^XF\ZK^Qios1"A$<O!jo9D.>spT&tf=G
MMM:(J-8J=J;1J]KUG"1O8oTK5ai#+cDFbAaX]Fnf];:],pEBQ#gfe:V_STQ![L#4
,iB47g0'2q78ZDYd")Wp_uM&J!i75/_cgfl9V2GYJ-8Ccblh]me#`N/Q(8D$noW"e
OaqKUBNUg()$M>f&g.2fE/4M]X@(.)W1a@X^kO%B!"pE*;A5^3/N$t6:BDe,![Nk>
!jo:Jepd24:'W\&3b=.=^c;HQXNmf(!g<TjO8oSH7"BI3+_=O#:]b`H6P2$Q$'7EO
$.,oBRP<2<!>6LU&kFeZg=\;u5C$h<".MEDZ:#tr*!$sYk>Xp%8Upq7J-6i95We:n
Z7'H9!BRHYL_tXF8>+H8BNRo%R-Be7$'5,nUmV5MCmqc(]X$";9qG*_+qejT!"GuM
.\jd)5QW2r!Y,g8STRJ+'K)*T*S=1V$pXk>@$ACkeZ76U\T98Ift)<AI6MGtX@h)K
ZtQ.JeZ)X6)G`nS"A"%G8:Uj6,<uJl5@+a=DZY#gj/jCq7fnMli-Co/eZ+n'1M9J.
ZF+N%;U(dr>8a3*1GEa1!""_e$'5,n<(k$Z;V5@u,iC]a3j>c&OReTcK*3MqR\[N:
l&o!9#nnY=L<5h`Dit),O8oTK!"!<?FC85`P!jg1Cm)0IZB0S]"N!W:3Vr#s+t4iF
O8oTKJ.i(L^cJ/9$5ns+*S?1@(lSSg^b11CUTb_d[EG#<OT5]L!"#HV^oCD8e@^(u
.M\=t9iT!G'?:F+JTY4K'V>M5,uEDG/4X&QeL9N+!>6LU&r6X@lKi;`Cp^[>7!S,,
!BRHfBSphn5QV7&)hmD;CB>6q,*;j3O8oU:."R3g-`Wr&5!!>J#h->*kF>t*P6Bl9
J.?B8[6g9P+=..GH\pDpS.`fIQm=ou,X;DW-'2hJ1Gbf>bp:/IQO(rhF\,f%Plq^j
+?0_OdFSLNQpi2"&g.2f-jtT2UTb_d/W35gW?hUf?nHq?1*f*dKb6#P`/)\4^)"_M
Yt0BJ8:Uh6+Hq>\YF4ibkNH\..A".@J.AYr)PaqjO?`m2$-!SNDV,(-SOF_'&g.2f
+G#[fa>OCKdFXQ?B#6DnJ.?B)JS$ec5Q]IL5VFi%o:EPY6h1]nO8oTK!""`P<!&J_
YT/(N8rhli9RmUhS@(`;8:Uh6J-8Dn"A"%G8>$4i_,4<p^(pa4;.DtD%W#r\5s\%l
"A"%G8:Uh6J-8EY/cda8Mc@7=KO)#[XZQaM^m9a;F!Ui"+9<)t!>6LU&g2`D+b5\V
*8G>(7W:/I&ego?>@PCN--nH)Y%`jcOoPg,SUal'*HsLm*sn#oEXA+VLsL@geT%$M
7L(hGg5]!12J`sJ0aJ)I!"%^P^cXU=&VWMBJ-8Dn"A"%GWZaV4[Mgi6]keZj5&d@+
#-cl.5Q\A"YW]B_ZFoE=4dK.Vk"Yt'5Q^?eYiT6=JT\^[==o(Ye@$io<T0;^$'5,n
3(/;aWC+hN+f`q"NZbu'![L#4,S5NW/cUD4C]rC)$=XFOXU:@@Ft>-MO8oRi$*ZQ%
dW"q>p#rRH-ohTq5Wf>)DF`s,`^?r7Ohu8FMbV#9#RQRm$.LX0[\ktk]L:FMO!OkN
A4_:S;FA6C4)3#k?+P-W)EW,DRQPl$RQl;9_Kek:iW2g1\oh#:-;@I;:7Y?Q7>3p$
:$o/]:tl`/Jk/Re"A"%GS0YoDe4I&J&Xn$IJqOq2J-8Cc0*8T:;(E.C/[sN0"q;KH
<ifDc=(+]AGf'tL<.bDd<kWhP.WndK8`+[p9+2XQKEOhr"S*hRp,#QQ0b$l@``+Z,
MZcSd)$78$d@qZ6^4#mY;56TpJF2'u;dI"Y<@qF`<-@KU;+B3,U5KW@jia!k3HO>]
n`.ZjC"&sDXS_YSUIL7`=]8chSWD0$9okl-%?85g!""`P('8;JZTrO"'(tI]dO6jW
O?flQfPX3;EaUWmg:MQI<P*Ek20A%YeZiW)=M^F]AVqB[@";FkEhs[;H8J-$,A>,@
"cJHgK9-'>O?aurYWY^8>,fPQk`M\a!>6e&!Sd!T_%&$I\2J6[=AKkW5(%VAS6)I0
33iGYoi%5Q]O8PWY),#DWqj)/_5bV3QUu]180IF*fUaEW`RJBQoZ0pl!""mNJF.Ne
?j@GlXoen=<1#R+B$?Y5&W)TjNugIVFQ+H2L?K6&#Z4J=`-);W/P$YI"@s[."PB:m
UC'hYaj;8*5lr<.4p&1Id=NCk[Vad!))Gm'>Aq2T[;Xs:Hpf1>4E]pge[&maeYZ%[
21>>n#VjaH`-);W01hJ""@s[&"PB:mUBXPUaj;8*5lr<.4p&1Id=NCkqXs0T++O2c
40b8kZ:XkJ7*'Z,Z=Va8X]M]tqVd2O,/d#j&DIpN]d-a$&g2b4'4?0UN#FrE-:<hF
"UU8Uq$>Vj7gjKJs7;l_kkD`=r:.fb^>!V@pp$T3ZY%IhSH&TcDnaUt(#F*;9,0Q)
Q39a/"9J_YSd&R^r0)GK=EtUO"@sXN"DkQB"ZrqXOAA(9,Sje)KP9)HW=Hes_rN.U
oL_lh3Un^.O8oT?&R]r(7`^Sde>!t/U6Hog!q@RE],d^M)dcm;75EU4X=T'5VBeD.
,S1%ZCenQ6":HDMNtrin#neA3<"lLlNm`JQF`j]fGhWt7C(@lh<s%9-pRRa3Dk?h%
l`V&S[I:EE/uhdD7d@J?IT)VJdCOJd\;FUp>Zftcg&M!A:UTMk];clqgehMU_lR"I
<:f7se[k(L>A`/9hcR:$Q2:4/DgaA*euc"(?[mM(S3Q"/JF.(KFVI82l7iXBdY2\s
2IZ'>5Q:F&'N!T=pg8OL<B^B[o4jnGp/.;t^3Q[TE=EK?^ZLu#Wi`_`.^#Km=t\Rs
-lpr.=-rgmB=icW0*,S41kD&NB<$iH$8m%q>ZI[s*S%,f-\\tfcT_6-C=obaIYTZe
f\jSuCKe)so6^)R2c\bLIC5gWK*D)@rVl]_X$-1/6d;#T7rLZ%p"!=`S4C#Df[t)h
U.)(^X&dnkkB.6ZlNnr/TO*-HFWGD]aH<JuT0@Os_8,.Y_"P.Jr,(Oj4k_*J?TLc`
9p6nud]]-n1M@92(#tp9rm;[C/mPn_?QM+AR-N;,T*\Ehmk.nW.*0.$p=lXo55Qlh
qq^=KB?,uNVgA%$V>g>W0ASYgdn`2nSS]8KYhb>fJPBW+b#)d*'eDjU]G1MMf3a$@
)Dl,h2PaDZEJ;!bP"ScV>.(_JbEjk`kF?URHM#TTofJdOEF>DfqJ"KfCKE[a$3q-G
qLW4;!tPaKp<GbgW3<r39%e;oiUe4<kb79l!tMR/^1if8*==di^hO9QIBYkW8mTsS
90H=6VIVWKAt,);=eZfkB]/K6o8;3d3$q=dTKA8h^\mY)3NsMcG17b@kfEbob:e9h
rBcb-8"k)A1W\F$pK]haA^HjedWR]E#M,!u[jGLpJe;dG$"/GZLa.r,]8=GiHMQZh
X7WX5=<)VIOfCj.(/Bh(55*W=lD0V=;Le`F[lX#o"4`Vb;tS.H:^_6dYq%i)=Bc7d
*_+Lt5'lj72.Xc>CC]]HYJ$h,hg^,-4rr:K(>\c1p='O7Kh4j!L(U_<5Dci5kF[7t
4&SAf33\H+nqc^5*BJ;@Wa35[X;k?$<)/uF<UI?[T%7^h0f>dE457JtHhGN3YL%hP
7KGrt[G?kkJLsbC8W.JuJgHCPP0/D7/`2'X]e0qDJ2(=XgG+3WI"a#[>AUQuJrtac
MrXg6n(5i'S461hh0.OieQmCTV=1*!_'/6tXdbn[Mi.f\FHAQGQt,bf*Z-(@(_(oU
R:k%Al-n1sqsLL;]Bh;\gMXXfHh\F>G-&:Rp=o8].B^QK7@Mm>UtN7t@m.,Tqj99`
k*]jo$`[c&r:%V30gj:^\`]QbV\EW8CkiK@oVaUtaahR5;5=%G0L?3d0qAZHXiTPs
hg\_J*datHNX,n#pk(s2pu@F9`JYPupkKl5QsN:1d7"j#4;c;00gi,pb#LnlYWd@\
J$;(Y;JfEeVB2c\.HuP6D:<3sSYf.Fp!da2g@NWT?Tmqt'3]!P[OIR!a9F#]",h<,
=OQcf7j%!/-=@Y@=CVe_qWXnn#8cVihW'VX:-J:";ekF:Q.fhY2AE%,7^]!%5Q%as
n\uL_ADV$uSb.#9fZIIC@&pP6":iX`Jh=nTBKQBaj3gRR<EELPV;=99b@^1Smlk"m
N$Q;1U151pem!&U*G+K`V7s(Nk]?Ldh%f9bZ$,i>UQ/5j]^^`B%4nc-[p?UhH:D&\
Q7[79FC:*Zb4fbd*L56Q'QaT^%tClNMA(J/hLZ*(U.F@0%V:.[`>ACNfBE+FpYLg-
E-Y:LiuN0]+o^r=D;4@N1/5g(-B>5VRje*qidC#FiXkt<OT0h3"$G7A8RIYn;=BiY
IaR+l]'1PiD>2k1pLFpa:I\=Vq7ZOZRoS%KhKl5#\h[P>CUi:kH)U4CHBaFKET0CT
eQ6,.^Lb@:'-jH.RX?:EQ<S7k*In"WIQf^GE.]NR<BW(tr\`pGnAMT^AIigIFh""[
E^/?;0>?Y(Q-m[*]O_4(-oui>5f!;I3?Te?bX$c*bQ5cTX^IV)mSRh"0OD2reu!;A
@Q-'IaNPa@m74]t@j+YAC%.q)1GbsW*P.h%Z9%nQ)f=ZX7Z,pfLngha+X0=^UXB1E
dlHNS;`r_AbEInc4kNnWL:pj9??kE4:HEK<>hNB)Qa(Vpc@.dlZ1T`^n3TqEQdF?-
fO5#%bKi68/3h?Y='_Z_MR2`-e#]`GVmt?nIt.E$QMB\@`Rn>X@/%T"nmo:j/sh\4
jcg6eS\@)43^;;jdOtuXe1:XTm3nhB(3CBZkeIse0=I"%?=PK."g^MqcC3-<^0t9A
*#Dt0Yocbf>Wirno\c*/n$%g),E_tR33[?a9g6RJII=Z/r+e!83*ppq-3'G+/o,`?
\.SK#X0:)_@-DRDellkbcDA8Fh[es_p<u8dA%7,!14MqmZ&Z093pV$r_1TI-^OCTZ
D;`3\qE/GMA_OC:]*%s+aBDdg#0sM'VbA9-ZO)p>pLQbDPI4]Q)/#Ju8T2*T<^o-S
5"[2PQoa3%n.aS(5X"rl9)bS^gQ\b@L%Aiu2??&W]9*CLdt*e;52'UZF'oS]B(5RR
77Kn_VG3O\Z?oI8-oteqI%pU(nA#-0,WPNX^ZV28.bSH>$ecs^gMak*FP*5gHes&2
q/XT5XA3i?^%Tn+A.#[kD_]Vj?rN3MM'nmncX@W0/fR.AF(=f9q2;MaL=M"tDWo45
+oTW8]^Y[3#9W1-keLpAAc4;DYpDf>**AVLkhUXXc(7U!oWGae)K53-ajrq*D1f0k
J@MFC:3"`RC#m+oT@#O1A`m;_,<0]tDOH![R?JG/?ls^Y+[;"_!Jesr$O8TRlkp%/
etr4Om_&-d*>P?P-6>W9AQl?gIeVZBlS-E+KRmX"H,s/5s$"<A-;BmoWgmR@(Laf+
AfLakHBE1V"qSc-B:nRh]56.UI18q._T;R]I3-@Y7Cp;[8f?m/#)Tnb)g):54PV8K
4k?/&$FNSo#<&ojL%Mfi'@MbI2\7TdA3-sYr5GV0ESuFWnQU1jeYAt<m`@<?8jT3(
;;&eB[p@TlH`\[EGs.Q^XKTGP%:^a^0BfW+#PN`W0(@>SNLdFMfpkEgF@(/8&Vh64
Q)-`LNo6ubf`,FI/4O%/[=;MD*^0-DZg@)<b@kKsAWot!`fD#_@-Y&"$k'MF7M$L`
YjuN:0/t!"UlFhq%mJX0='cU.aI4r&JP0`=jHNWg<\>2c5[hfpdC63boE31G)G`8/
coo,*5,S+LK.6$"at!u"39E`)%gd2uc'0Z9lis@X@:U*Ccp>o7SJIuq7UCJcL(-1M
Y)c:9h,ME\q939E1Rk@5faR3#CTjl#_,0-IikW^*>Ead?N`&>-Ya(;1G@Kj4F+R?K
8d)*58iTFh;Q+F>3b+Rp/HiLnRugYb]7Fq;,L_3tSWu(+H<REWLX'COqO0eF>juSK
QJ)J&C^t9Y*CV?_WOq@2`[Ie]P9''A3O%2(7<N!LIAtN4fM'A#(n$Cl39lS/f8U4$
)`fXlc6>L:?f%TOQg'm:b/fVR/Ek%40Qkd/1pM"-AJ)QS:M'qNr0FItl+l$$GXslM
HUojI:&k=D'+:AKct+8#T4@/=RHb`5?qp**0OCF`$(1Ernq&$5nA,A.F#25pRn!5*
ZE8bu!s(kh9feZd&U$!FdR8j$p=L>E\(u5^l0-)'f&/o\Cs5aJS1%sE"'Z)"F!mh;
3[ZljY!dedXG!A0-\^3M>\u%q[Ukqi<YW/sE5<cg",m%q/Brb-1Vqa5ZY.VXm2=KX
@T:nufc8X<4,QdG;g2fJ65.oL%V',"JX&qJ[4LO?%[P!<;iI8QZ!rEBI4J,pbj)e-
]'K97dt'B0bPuGEU+JsZm_G9*FD)4>*=r1oBP=U^$@6i*k>PXu0d9T@BWl8l[M0:^
FN>nK)C_4>=MH%A!UB]gSTirD?NY%`1n-%h:71^I@1Fj>lBjU8iu":)S8/Hd2F91h
A62)nFqXGnDnGBp/X!c@`kR72);,LYd[H;'o^nl547e!m`+BiGd,#o&br4>#%qaB$
@3Z$t;%+s5)DUemq1C\J4Wm-A,99lRd`l]/-esrX;B#\eUENJjhhB^[>\u'g[Ukqi
<YW/sE5;Y":J<pg2k8.N!P="Z!mPa,N2C(<XdOKn33^NeaQC9Mg/0Q?\l?VeL.2S,
1Y)O+#2`!?5u^Aga#Dn'j5"^q*L0*%1HS\NcDC]%d8<hkCiX2!bbgQZQ]&/U(s,5#
E:QjqF,k%APHrJk;htnQnpMJUgQJ5r%]m=+6LPnKh+G"6W*"S0"l^arN6$<0>F]N]
CkK'jJ@MFC:3"`RC#tJZomMT+CKo"P7`[HV"5CG3Dr1hKqWXnXKS-%8l4?F-jjc*b
3L1!0#TDPXD;+1_S$8A8iaHT)EDFbRJe]"83Zc!I`h]@_B)05uX`7g4`n\+GFXT@+
@''hub:pMd"-+b+;T"X;RTVa8i#I7!#nfaIo+12ZLs7MF)>E!7D]K$$=-tGi#`kMm
Z'Gb-ZjCM+Zd9<`q[llK8WtLsnZd'>&%;f]h7FsjV9L8N4_><UrHZ,c.BKYZBq(jL
ND)[2J,["9QD6X3),.7TA&aJTCH19h)CH2f(W'cl,GpGZhH7gPI=r'H&_2oaCZ52=
Z2SjtY[KRGfYT=SAlKFj5+&=onnL3M4YsZ`2K?TO`3?SK=0M=A-:Sn5j>AlF4DaM?
27Rnn^bZ%P@dL1a_@3Sd<,:$ajl_=,T!6tT]M:t(_nFuLNm=.:2+#*%3uSJ3(5o@N
+$Z7TM4Q\#j[3r`[eiq*f`kM&g+G`>jAZ?IA^1nu,7FR2$=<=U.D5FCD^K']o^(70
4+V@lbf1'i-eP+(4h8B2Y6J[iW0&tPE!h55Gd-Mnq!mAp).%-6@=!a7-,7)+eP?\@
@PB;7#"RO\WcoQ)\TuG[+#(kKZmQ]%2*2/?B,`oH@L'iqbqQBf,p!W%b9KKN+U8uW
*)AcoA>P8BjF)EEL\X0N",3.lND21D%-<`J%dNiAf&)/"4nHerI8`=MPn=Ndc'gN]
j$OX3VG/jDq<\._UO*56V2.,;:ldWpPjh^QgB8,*g00uS$2N\g)n6tPn1#CDm9o2k
^0s+ICMM)dk09C]f<UfA=#c_SM.Td"_VobWS[(Nd2O>G<N=P*14O"M/>g2+kRuUn;
Mq@IV)8J5\\:tJuH1uZ^E7eUVF>b?PS6BFsL(>B/m5V8dY2_MEUT_Yj=aA&khU*Fk
&f>?'W%47o)$HK1.#WB$&+VWb_1F`-n'VjLHi2PXrXT<,JpAFng7[J^".=Ag@"]%T
r(u@+aZ/?'6cj*iPZ2JtJnCG&Y%67?IZ^u'VP[lr?nc>%^ZFERLG,mAH0+..@&$eD
E`n<SaY#`kC>m$`8k(#tbL.=dBV=Y@X/H!tnjsGXaMr$g**N7?S/GBhV3J&sf9^'^
MN[4+qPEB';lfrm1W.Di+XOhI9%L!,2BqaAf_L+&$^<cd-ui#4"rhB?2)o,9>DDu-
RlDiOHs+@@?'Lpd[*D8PBir_SpPUV5V8RTk)ZjhOA#"pU"JHlp_H1j?\Cr96G,#U6
q:a68M\do.0\(?NOSiq6JW5n^PtF*$ZT]I!aX<RKQ1s!Iq^ifj3XP">7^!3F,DmHL
P90h[m:b/n=;5+g8!Ih';Cr3CC7r.^mp>D[-o^A*7\QW*B8$h31gUTU5ClMG/%r@d
-c-]GhuEf4#2=\Q-W3@t0p-4Q;CIlJP=r2^!R2"O,[e5)NJ.Hb]8%k]ag.)S>'(:;
dB$%A;mPO\aehhq;Sh74@&'F%?,<8sb"udr+Rc%'h7@aX7@(?b8p30h;t4#A'G4`"
RLEb+O3,aY==IL\9eOO+`gukQ6,7Y*)@Hf$W"+ihbh#ohQ7Pn=hFksqrIUs<R5E/I
*EYZQpUBMsQ9.%^9cF+,"dZPQIRb-=%EO8rlK".):)aP+2['?:SgHhHe719+R&^oR
fd<%rc,H4IdRCrp4'He4(@1?u@CMDjdAgkXFu!"e/k75VYKD2d=_;,b?o*XM5IXq7
ZKK**,X;DVOF.+G:QqJ^l7j0&A1:'""Nj6MFurlN#Bo7RR<j:^]WaCH<S=cZac<#d
?B(*?Iaj9t@&&ji?,<8sb"s?K![Nji!c1YrTi:52)1#gB8:Uic8&0:0=r%?D?3R$]
_^_jI:fF8e<Ut%,.TGMX;@:#M^]!l\9"+1h%3%4,&gllI3j@"&fre`1Eb-X3+9<*G
*W`^Iaj;L0Qjc-`'I5pFjWe0F*A*0O]4fS9e\?T`-1CVd6kY3.PDaRgKcY>DUQMlg
_4p&6:aA:-,`k+iCep7g;sH(TH=SHqJ-="b^iheC('bWMY[J3r[uMCd/sKt'%NX'_
dA'(HjU+6X2A_qah6UD'rg,BiOT5]L5e76*4\^[FWQ/Q5Oej0$&h"h&g[45)!rr?$
s1m0+N;rrD!(fRE<:$.Z]H+ENa7F7o-sd8"V8]"bDCl@;?&KD`ibl_m(]&)Si"^$I
MY/.3?&B>O=54u!I&I!\pZu0IkO(JooD.0gG-fRf2RC0BAF_D>aAbG)qU`J-eQZt*
<C,p?8PV8("EWasGFH6oqi23bs/Uu'R`N]0dnFAEFk/8\9JAc%kN)gt[*V,P]u&ot
;cH-)p&1n<C?TQbat!^]"*MB[SPSRE'+1[ip1"+se1?gdb(5l@5gf2e^M43cs8Mn6
F7I3cRtD58\3i>Y!Gjsn(-TJ(Q)_*R"3LZ+5kAt\kL8SW;shWfkXTKDE^2W]3t;rf
O4G;dk$dB5QX=X=g1i,oj,>eVM&mU+!Gj;kg&tG;^qTU'$hN+k^BOFqcRcEH@O@^p
nfTK0nat:+Ro,qMR0=C3:pfT:k@s\jrU56\eQ6*pp=a:8Zg>!@9%5Ao\AGoQhL"CT
F3]V:qSNh.R",/5hr]P%4tu/jG@#*U+p6lj=ChCOSQ?Rko9N`_5'b>P,T[^+f3EBV
=a/\Ec.mBd>tGh!9(TgtrQdV"fOJNM-'g5j]66onCW)#@->`L`dRl$X`>2Z/8AffL
a<Qb5%6*&r#Rb"PqWb-DNAo]JZd1hI=ap2.bp8KH,*-)Xm5;dCl&#.ThKe9AO$EWR
l.rt\&(]Vn3)Jje>"0)B[0dm%[i\Tk[d=coLZ<WRo!%N6LkZTm%nDX"C&%C+Fk'Jb
^.5BArd+25n%T)rDnl8Ek-j#^'=g-hXKr,iH;PXeb+2$Y91B"f$+Z!L4gscGWni.`
hKYgO@"SpT1<V4Y]63F?ni,a%F'<3?C`e)td<:f8lWZqb>:E:CI(K.9S#uRLQ8([T
Fm7>n:-%F#G.-(9Zb,S0MuE(Un(P!cjcroUDPF?FFLHI\(3%Yi(YQ@]RS1dA3co$H
Fibqr[-hGZrq+Z86(#F^r:A8%qWk=<BpMq;.3I>R^I`S7YQ?m/j"u4N;d<2qPZ)0S
EPMJG>J'$dCYIg05JEXuKuJ0M.(3'P:A2I*&%(rP1QO]mfOIkOhKe:Tjk]4RYFjqF
R:i+RpcnfVZT\?doAuP']o&RjGMQ9U!WS`E]^Wf3mC1u=W9!"1jPAX+Vk#+2`"PqR
>Aq3_*BSF\>a?:o_?&!GPUQC,!B<nn5H6gsm8T@+j8#D>E',f5Y)8BtaRqt<?.?$b
elm6P*Hi"Il=D!tSoMaf,4@GDBHrXr:9bu"U+<=LK)O#FrY&?j%;R<rb+2&/MDJBI
P+MQ.ZkpMAnA#.WU%4A-.\Cq[<rm,8:D=c9H!X(FN!7Y9&-9>l/\B=mqad+'.`oBM
pTr10ZVI95?[:`J+&pgpe&k=t@/p[+IIk]B;tJtc^)@!;9#T77[;pE`0FpD><4SrT
_I^FQdS';hF3b:#<HRW8Q.E(]g/Cd1[A*<\:#r[af'W.>GMI1nAEC1h19Rgmm^g?<
!O+*`7HoXVT!5#[At!FE@4;!MTna\p$S8N4mGG[nFkUHn[(T@<h#$$:ZN5S&T;.H2
g,eW.F^%&(g$3tm#MLu+VIZ`gWm$#dqGH?_Bd]lB*6/STLSa#THrlOp6r'knhKgC+
I/YZp,QIc<it!4W^K4`eV8tq&/G/2)T8NQB/kX*'TTXRWXTgWfYX]a[U^S=%YbYV0
Y\Doqgb[:V8oj"3-bTbhjM=4cBI'*JBhpCsr3CGl7K0a^?Y9]sH%l?9SkS:9Dn`4P
fLkIsV]DlZLC\p3QX8B,#B9'B_a+MJA/AU#nX9G6h@2#0(mAB9\D2,J=TIM9^\e`!
^*E^E,<M+c=9-NLlV&7G2!`AcljP\o+Rd_0?[j)LEtJS[J,]8A?"B'dAAu,*U>D\d
TKVm\C<$+SWZ7t5+&sAJG*0qb;LT=&Vt.(ZK!$oY(:b2e#eocAq]tOF$SO&>I2'Kf
&?AXA>N)\^E?(of*_e/ujoG,AZd4q'`Q&]sLqE)dX5n3W^k)(8U]<<T)iK'oScORH
Q1SJbbD3:m,V@tgIA"u_8)$`sh,LaPQi]>[e.taqg/H3DdEK>o_@)Y?ED4M0$0G`E
pYC%['su8W4%gHUjT4_+0>8j\aY->H-VTf]^.,`oMC[D[VOAt7YlFXmO$2WmA*j-b
cS(KIgCIs&%iu]9VbT>A\>,;Qp&\EJ"VY)QA^uobBYV-&mr#%oG$:l+2uei['C,e1
\'^q`L8VDr;\BW>F&ir5gMA[(\J"!EIe_lf8c=fF0!Uma^:EXYUPHg1"sU5AoIXLi
K;/9SeafT,DN[%#EPrI[Nk0Z#!d$+NKeWI6Kp2Mp]nN3V8>,jH<.DA9diNJD!<T>V
!Q+cimA77,YJ%CCrql0OP>=AVB:aB\),Kl^mC<2qq^("#^A?"?\)2Y_?;0#-SsE=V
"IPZpZH4Y=OJf2NID#(<Xgd/%0=]qle3AUsPh]SGBu`-dCfBn\p+s.@(3m+bltWT'
((4MC$Mj]@`WH)!>mO@C_"%nt/%,\u,>X\>Z'b%4?[qkor=*b>4nEA9)ni=-#:et.
Q&"TZRk@]d3,W-)4LDOfH&/noG;a9"pWYYS8/U(r_\<>`q/0a_c*lAE)igrMmGpMY
o4V<i2$^A355VD])9`,Fb`V_:jC9h,H(ON")4/@m7Xio05/dhE!$QUh'L)Ha6]7fH
J-q\Bp"*P&)DI`bM@MfA:jL&Dqe6(J'2CN\IK09?jVj4L)4u<IM4J.:3@#UF(8)!'
SRRI*`-g#)s7Y2cQT_U_giA=#T_EO)"j,Mg9O;kl<HA,pF3b.P!h`:Ll(l.E?,5_D
CTJ]51!7JrdV\pVfpDU<n>L8'*JmJcZjU:G#XJ9@\S#"p(=!VEka_06q#^g0OF>)1
:ZEVEfaA,Ep*QEW0or]*ZF8Cp$SgB?BQEQUba:*tLGX#KU`P%,p]ib]31b<IB`_ZK
A%s:9N*-\lS3,n>Q9=4(-*@0%*-+TC'a1c8l-i.I8f:,>Fd+Ff$m.Z<lEUBgqodW"
JHKud<E<6k(*!<QbR*VdA`;Xl0>I/(/G[8$R!eiV#S48a0?N/PDtjTZ?IVpRij?[`
--G+hhgJ/'AM5[p@>fhYKH^FJj+N,[.)c3hpdDgnW]#7e?09uBn])`H=m3QZ!;thP
WNeH[8O'4;<-bG50O?ATZomCgKm,F+qiOs53Tl&AP>N<M,m)t\pnU_9NWYQjUM6Q+
/6RBinpncf3,"]s:upfPAr>.Fbn5G=l1g(r@otUmC#)nH1Z,C$jQHb*)HRp+Cq8Yn
U9R#MH,C(M8=!rad&I.Rq=A3!dn`3A4EoYZALn6-1.:P52=l0-_Ahu-(_)*.!/q.o
!#iW\=u]<Ba2bUnYg.m+gp>]=!K_!0f.[7!W2oqX7g#.^@'f,(BO`"ak^D4ara5_&
P[8k<FfEQW6%abZ!(85nLE:-ed)QfMA@h$&$T)DpD9j^SLZ\Y>:LS\bp?oQ]8tB)#
oK;`/s),I9(234L:@Jj4.2:#SX8Y8/p6>1LD[=UgT-(RU52e[V"OR\l(,kts;2d1o
BcM!!h0/@Z"cP-HPol%@Snf=8:d;s*Qqfj@A-ie@?henD!;>8rn!+%q(7([/#@RKs
aC0iE(.;diLAk#,k5bJ(T2K0?TTXb'H"[6aEV+]^Aue$6^NcjNE895FUce9RA,LP.
T7*pdMLP<pD]$4of#QlV#ld"hegV?OJP,(P[#ur*XM,lmi&&b9^G!IeQh7<Y2Q[pV
Hfk-28WI+bA+Fs?h04dCQ&fHL4$@#lMq/(G&-%DCO)$S%G`/=,iJmPup&^,h"<]$t
(r1kl).o^-a(.)%eBJ(tKIE_?!(o)bIau_*QLY*D"dWT7L.V=D;fS%%8$=d<!ul)9
VS,i9s!*&\#o)bJ5i2)eMhcghg<SueVbK)&7)E%[J=)k%'6t;-LA=CZYGD[166$5-
<Z#YHTd(!;D((iK<rG1c%%F*QZj;k9-k=$j#+FF'U"Q:aBX6[>Hd,$T+/Z.1_f<59
nA,@KZlG'RdbgU>hAK$7@kQJ27.L^7IM!rrYQt5e@)ooB\f]"['aJ.(H064,-bNL&
`rZ%'5GcB^5UHB-nh=3YX#q@4?r\8.RiD,,.nUlZ;_#ZAOaLN!5<^a;PQYAkILuOY
Vk+5cfB[U!TTXRWXgj67X05&8OI?qT!Gks6<<&BTf1J[/!^"%"2OY-qirQ,NjNa6Z
8L$@f!)*Ba@>Y/k@8Ot87,$WX^HQKO^_-k0@'[\'RJi>FnGj>TMbA3='/Z@RX)V9b
oGUo?R!FOF'pE7PB13DJ"Xo:aBZ3M0h*#0R_`gso@:&c6."I;sn_3OfJ9>M+8QfI%
$Vr5/K=5GW=nVN@,7Is7FnOcE%_th&p!a'<UFWL7Q*Zf'N]9@[HIC,JasoUqQYR?t
!53)r;);Y/q*c(=?'tO2=L@R;<!7`j1`HgZ,`2].n-OQ[2l1mAJ7&4'2)Y[hksq"o
aYI)^iHP@'no3C>:o$3ATtibU(]>f!mt&I#02+q;Q7Y_iJWC28@Q73+4IT;k`KJbQ
,Rp:+Gm8e170KqW9IZ`dB:aCGmG,7YRLlCi@Y)jQ^K-M/*eB<g,eU:7_$OZRKE/,o
!#>P9&.+O*8`B9P_Ed@UF3]oikH)#8$7?LB9k^+@p6Dr(p>LcKQ@$@odK<Ue&G<^.
dS#4@R=LM]b,V5?YMVS.o:X@84\@]aTkj]^VY0S>h[c6r6h7hTZHFL&o`^H9W$gpc
.a0DMG-q<d<rK?)A/p-=d1\V\2/8@oNr8Hfi.5gg"*`f"oS+AL&1=OVBKh^<UX@)W
C#b130$/_Ek%L=T,#1*aHN>[-Oo=/'Ptn&5!6]Z4n/02?9)1HnT(t3M#o]i_*2oYT
<?<L1CmBe9!NaG]EGofYnrW6I]X,pKs*QL`i,=CTnCAg*-376K/W,g];DB/iA0+Gq
\`NmXO(urf9EVp$giJP<grHc]=jMt;>T-N[q,r(>j>D%(,u#RIegU\1WMf4!qbG@M
!H!;6?k9:c!%2J78+u"$Yl=Po_S`#T?qVDVG3[PMJ]/K?KN9jE?KqPB@h$::X>d]/
bS1ToaGZgp3\lgq+2E5*j2V31:8Xb=pKeg^H/]f=dc9RNMhe+E3>SKjR.4YF$BN*C
ra%jQpHAse7Z3+KZ_oKA$1n,M?4C^OrNcL"#I*^9P6^n78pFeG@cE4l0&`RT`\3cZ
GT%;n=lkG1B^bWZX04.6,JG8td5n?O-W,3j/>iB)q64oJarL3V?DDq:E<):fc1$Yi
c:[ml!5J;-C2=AZdZ8jk<-^I+n&$nbjl(FaX7C6-gea4tj:#,Hfs#r<J$b5#[D8,t
"CSK:,EImMrn'`khfa%5P'JmdaGM:EY=KFJXI&+a^1kg<BC5;Zq<G#aapX9M4GiQ>
lh^`"j`k%lW#4tC$"1aDY[a*%YJ+2WfV8eX_jM1rMKkNfHF$k`8n]XS@fToP,&u6C
b2-,F.e],/6<Q8KaJ&\;lsfC?f371o>o+/%*/O\!4lK?KLI?-HViL-:-%CI:EQ9(I
*cl%Bp^Buk2smED*^HK',VA]5iZ\2FM9B?.$O*o,NsA].4gD2V3:%5Hj,A7?pGflR
,7L4Po948U[j"Qa^p#bgY`hgCa_)X\mI],pBKfSla7D*4NZC2>aHJckhMg6ZZEf7N
4j\^45U_'FO'NqQm7&lNFjAo$AWJ;%KTAmf=]Y>^I1a6`&!6/p@c/.$T%P?S6s0L*
NH92+0R9o'7!gX/k.T^aF(N-Biuq*9!#DcpV!$S'`&ki-fXN[&j0\A1r8LMOYrPWP
5H6gckHR3BAue$6GP%9F_sqe8;=]h;(VULOGJa(sMqMdTj1aE6!:6G</h3bMW,*F1
5OH.aA0+GqZXV&A.oI'HAYV(o`-e(0Lrl!i@G1BV6lE_QC!=q:Plo\1c9"g^6h5V:
,n8+F*+@]]2dd^DTZ%%dB$]rA7&0!(@n\"i539\R1meqtL+2kE4>U==&-ol=*/?uL
I6a"=hFV&aVN:'i"k3Ne!Bu$:Ss,4"<emtPcc8%L8gZj2EW@htSW1'.:E@jBHH/=9
8Ne,Er:+H$Ef\SFCcj\p+3I%tlSWfV4<uZ82#rGNGPIL.!f3V.]VdqMY5ftq1$>'J
b'V4DbV27AUCE:Bj97M0H\l;:!1Y_C-4YTG+N4Bd@0d9BQc&Xo4XitqkFM?W!!1#1
WqT1]Iks=)CVPCN5k:eV["5fnd)#]g"H`@g/<,\fUFrpArLfbQQLEiMn]NnfcL;0i
ZE5=1huWb9'([B,63)<+O1/f[IeqgjQ"SLZYc/B5`W91,/n;kIjlW+F$t2?G;+=/p
3T0_gp5+M\&dQSH8!Sk_10`l!\F1-g"-nZ%B7lr>+]`5,7e83^'a3DXm":9q*.[/*
J;*+S_L+22hNuQ>Ep(iO')k<&QYG.64shS8qe.H@D)?gmJ/JSuNVa9P8'[pYFRS)B
\;r-"c3?/(S8sL,X*)g#A_fGS3Jh*OF3?&6OX'aPm:\[DcbII[WA3g.=oS!]m+ZHn
2,9WQ*&*M[i]a/t"/r1j*S<)AF(j?![`!=(:sr,paX!%pH2BJ[j0Z"1ml]2?[r50I
SHdHN%sHtsroN!^,F75oIsL>Sd75:Hs8DD9-2!)VkuJ7Qo9s<^-<\K8^rA@l?4niH
LJEJ:*%3TQ?qPaCI5Ysu2bpDjgsJ:%&*LGpT"XjOCJk\PTO=;P<o,nC3(qEYW10UZ
k:P!d,NHF8QUH#t?eX[nWGu=YjB:8to6b4H5Q,]a4RAMO[6(N4oJbe]cPYDJQX,PS
fJ@E+?!LEaKXl/iNAI7`c8%`W@iY'B;RZH^&'AjL-&-W&B1d#$:p'Q#D93\o,R6BA
+"N`eo>m@K%oaVLDH%ZH8&b9#AsA(l8\T,u@dEfDL9@'+_RMb8nnmV,P3%N^K$Ts3
iebZXpDLGB*/^kbmGU=Xo4ZAL/0A_(dq/<)oAfp'pMOQb\FVY=e&E9_GTX,Z?Nm\0
\E/"kd/Z(3D)>;(*!!c7;d6TbHKuHX+1*<(gWO#qbC5kXSMmY3=Y&A0e=:foETZ6i
_1l+n=?^Pkl*/CLHjhFbj+,FQq=mqXZ*YV=]nbV5Vt)O5057,^-4cjO(<(jZMIbLC
1?5gtUp3OaQ-"TOkL#_#=LWM$3%qMUGm4okR5<fc<IQd/OP@Zcgu`BngMOD;[qDs>
G)_Qc!-UIXd]SHK?tj3:Zf4!\6BKt!CRdmZj%Q))1HcMU*ikB?^Sl-IUBIY5?ZP2h
#d9bd[V2dip?YrV%0=7*k?J3f#pF+fZtM+tR-76)-(@'kfL*Xb)Hc-.KXoi)RnKg<
hKh"WHC[j$UGoS&)m^Vd*gY]%XWe:H6UTlrrJNOs1F&3>IC-A/"/#VoM^T=`JYM>T
RKH[$hodta29$Y\@PI+iq]LmQj!F!iqsM)B3%$MVSTVuI(q6uZ@W!ZGc,[Di#?\]<
2-,hZ^pJ:;Y[POs+#]K"@fjQ"OE9-NVOe*Qk!KAP@Xq[rS&=*1o?G^e^+$aAokO4:
$hA?8NK&!qjg-g^muU[h[FJdgd5bDeWjN@>PP[]0e(h%)l\O8UFko3[PuDsqb+@7@
XWS/M*l<$VPM>P@h#:NalDgo-_S6W5hr6UloK6;u!6ZEe<]o/lC!e31qST<=q`?o#
V^."FZHanX%k@HX!Gjrc'g9A'Q)_*R"3LZ+5kAt\kL8SW;shWfkXTKDE^2W]3t;rf
O4G;d_Fh29hAe/.[Ec[kiNGD?!&bqnMB61$9%@%d!TeiPT_UR?o4`:<WV0hCoV8i]
3M7@j*=%In8*^5li\8FoJRL1BkTYX\92F#11QC(*]Bs-I)HteeO94'^gad]$jXX>@
.0l(>b(8^8JBk(;dAP]Zc-_U+$KZeYTQV;'H600r!#oMta,AkpL1;pi]>r;7*#ZSA
/-'O`U]<:pkDC<gq+B1>aoUUSEhN4fT^ul=oVqOoF7c69691\YW#Z,#Sk#gk@,6D.
k13aTQ#i@4;9bM6GgoD22W3WoEq&#'m5g;"!GiC(9>cZ/@&:F"ST6tUTH%Vc%d8;o
*.=sffGsjgX\]KU#AV;1U?Bq("'E2Co*98W%ZZs#gi:A.N^!='UC(Bb\^^Ta71ZW4
)WCKDCaqWh*-6oLYAd_^2TCat)[,,n]&(-<#*mGQ_-(9WhgW1^$6D$;:lZ51(T!_g
P17W5hgAA8iNBT>>4(lMSs4_030k]-*-7(lB:jUj![JcKUQ7So\Da&pWi>(3YOJlE
^J8QG^"9rRqPCU7k^KYRHs-YK1ll_gFC[V94>`q,A5GG>-#$>Y4A=a.q;H&YT`!R`
01B(AlWtXDrMLBmlR'fIo-.Gjhu<NA0Bl$nNb5N`(nKUAk8F$[!,Pg"7-it+XJiBU
Pc,LJHKUiCm%K1UC7Rr+o_kr)mb3E5cTV#mFiPrQo>MMQgcG2lD;mBeJFg'`Sb7PV
k4.#jb1F!<oi.8'7_!M1m=G]u-tD5Q$SP22<d;.GHnJtk&DJOM_Bt^b,"nFqUU52%
>$EJUDd*$rmal3tVj6a:e!.n(NpK9$LFNhX)3$*VbMcKFgba;<S\"?$Up[toj^H[s
YWr'TK=UNl)s'c0mC2!0]_^ooEaUSi(&#=qaUJ^,_I5cYkFHgs"ua\q%_D)LQ0)bF
?[1N5Zck2J8FZH<T.agW8)qfLcTH5+f,AG+&Ui0upFEDVU>ZrgYbjF];4Nbrh0%<e
hbRDFo00@R/p[%@,2VhJ_p/&DYAYD2'rPq<jI)8<o?Xbh4tF[#9fC[8-.*N3A.d57
p?pbK,eO_,db9ses,J"EBk;J+ZaBEBh66f@V+d`*jZk^";<=Lo_n9oDb/:l^b)Vf8
&(4@V4A=d1r3N-\dAd<$BX:N4J,8E-Au1bnMEVC8n%8$PZcXbuW"Z(Z,9:u*oDm(7
.HO8Y`>%J/hg_!+cKhUA?:g;+Q<6KI9J='J_Bn0cE3o8lCE#H@ncIGoYImcW=o\Ku
n%o*A\TOl0s.=]08NC1kRK,7FNBdI@Z^a\5!aMd&7uk9/iF,7KCUN?SHJrGAeY?=H
W:EdH@@h[5j^B2_F^,oOLR%D<n9NNc5#aqQqI3bI2:\h\HXGZf)V[T8Wm)p80Q4Pe
-5fJ*:-5SFM20cDq=#>A]Fb9pp!m,e^]!l4h7Im??+P-_%Resq5Q<ij*d>GAG8ugb
-bg<j4OH2_J0=,/\(kG`G0b@"gt=__UqQKUCZQGr[FB'TPukCa*-$XScGlr,#%l[t
>fhUh(LMQp?!r3e,cs"HG5G2hVXb4EgUH'hgTJ0V\orfGB!@b@Z:RVn*GB8!69KSd
BY3N+Rp,!+gWh\.>deS.^=M\nO`pT8=`(Rsm+,BZ/TlI2`><BP*^/l&o?JlRgL5jX
XE0UQBe[kWhRdX>If8W<`u]#/STRt[q;mr9]'-nB?2jZ_+,frNgS6CcQ=#)dlPulm
PEjqtn)%LKKmn]9cTLfX4Psb?D5<3AF/uFOZ@DlLVh?.6cp8:>hdi#8"La7$9Se2o
jVPPr[bFF.NAfK]o(q9s&*u@CX<V//++C_QA`ZK/qTN(C#f#?_L_1jW/Ng]*MCWMP
DV_BUhFk`\QT"g[Vs_34l0E9&rRUDBb:[t(=_=r.f'V]3nd&T5N>;:RXWNbH9=TrM
FgPH8J,T&lgZ=`*cCT.+8^bXP0>4``Hg\FspOIH=DX<L(>b<Coq7m(C[&^CE](D,k
W3FRI7]Jr8o)A<$j25RH,V1D%XL_#5pFkd%O1*rd:[?Up4S&;9Im)\`iHjB`*2ln&
W]Vig;NirP--]"2%oj[jI6T%&2Gna]B<G#KH^'X<\)Lr.b/:#]aWGEk7kK_b-hM-R
<^*%AR+bK)YA\,*oIe:;C@_a_%08L<)_gJ4P!QLm!7kjuXjb3mkOcssp"*P+*]eH/
,Tkdd.9)BUI,U)s'#4gH"@Sc.p=W=RTFSQrSpRP[`+*/#kp6@-LE(>j4?rG]1[QEJ
4CU8,Hulh'/G"F@g1dHVIaiM<ST^/,Dh&n%D=Ydr[fED@pYOXcVc0nAGH%F)&cg*<
C&!5Q'EsJ'J,QdGEQ/m`2:l)CSRW0<^`s<Hfi]fW%6*'=mb`B[4o=ci+%q%(J)cMI
Q>;"1nW,`r.!u!mpBtBkhDr]@Eh0)^m]jeR^A*lKBO.dPl70o6]u][PJ2?GcPM5K>
qlV38^O`$&MSer#!K[DfZcDm"0>=YTrqN5gJ*QV&o?[:Zei=8&3:pKWH!p\G#4t,i
KebcM))FbIb^ok[Pp_"(632@18&c0lPJn!n*4N%9noNs\P$cf8A*hQ[g<$'ZT0@Z+
<;SkA9LAb--YofZojc^##o-BZ)/\!0@DaXS!7[-Z`mgK%OhKG,(P$bcfH\k@5/6pU
RhNi6mh<]WR.f<V:OD`]7nZZ^^0,S)K=#hdg4&$ookPTiO\Zt5=8nF&Rfh4+8!Ski
!GpKf(,mVG@&`]nj^Hs=;pt"GPm;TsqREe#rb6B\jTT]roNP#N@8bG4$a3[<q?ahu
T[K`drUndE4'G.]=f7j;WX]!%3MP!QM,V+uD/Uu_YO0R^DgF(@!@2@*-m&H+4VS+)
B:Nsr4:c44cTV#-#m3<.&^I,@fn/ksQaD:f/[j:u5$S+RJ-\pNa-gP.8\c`ohgP6)
aa\pP2@)-pc?r$sG2$jm!KNsu*jm:&0E`OiBaXnD!d%1#p!aW:p/O^e'Jok2d.gHC
rg[]9`1MMTkp8Ms8+K&E6\%Pl:H@MN\S(SsH`s"%^#FL_-'o<pZ7t4ET9:>h03X^U
p=d^$I@ifQ5V[P<[Ga;0*u]ZRKRp>=o@tkd=cn@K.\o;lS9''5lb&>f=<\lg]I8:V
%HA`C?jQp[GlX>"-[c@f@q!7g$O&N@HMQZh-0V%X*g/R2!1RX!p$C@1dQIL#dujso
T6@R9O@35]-)hum`_03Td<<oD?Um=EG]*lZ@l6=@ZMH\_cHc@DG'9/]!.Dj;`4PI2
\dMWcau<+%e)#AmMmbiG^ZHu3]V>T?q,;$E%TKJN<?@/*YZ^R%FA>_ZW:DY0q^H4`
MTUQ6F+&/sA]ZNhLZ>mOoK6<^AG$]-+LKR(1d$[K\u5m[T4cr_!na=#YLmg?qf6aH
K*Bm8rt1Pc?=4EWD%EMJe,eqO'F(cA(;ORM][4O&2i^Fi8S"2B601K1WMc>NZ7`ZF
K(*9^n%SZk3#YMpeI)K?-_>QLSpOj4@cpib_D!d#ct&j+$POj3Zje\o76r/1[qK1$
>]\0J&$7MZI-a?N:%A94Tugfm7Cu1k]mBA2;#n>X&8+kI/kj?(J$&cLlAGk8]O,sG
Pr;cRp;o*IYeKP>hO*7gDL\AP?+?L\h8R;Naso%S^]IKa!,Pi16\Z#33kM/+UjW1q
4D+QenGSkir*^'E0Dkk[q(`GG?$9@X7%<)8Z/QQsUA^H;?JPA0-1<%'ppNWG73>@h
j,Q2RW#P\)QueoJ@F;?He`TMH-8QDcaW!r+KG=W;K<k'm;qJC#Shd&-cdT(CasHL)
d8'\*)Ogijp7obtQ%ph"Xj$+D4":c].70aaS68_N@HFeg@`dm_oLa\8:WLMLcR\Ba
!Gpkg>Y[oK#N_a)mQe7Jd&6QOKOn!t^_.H62!'s#8mYS+I<>jH7>$GocYJAbhIt>.
'1Y/pJL$9$47>9\LC#5"B:X12KVL-k>0nsR*BA/94SQXG[*H"dK_^%EEM16c+Yd8V
U7dW3WpF.gU*tg?*Ztp-MAC-od%R1"oDfZ/07=EkBh$:%eqN:oM1)mI-J<T:??#t2
IC20>[%rgK6Al!IkC)-kQT%TPj])@iaZCqIDbBHCiXJt_jI4$gg?&2lchR,/A&8;:
72`me&nR&fUjbuV059lbZs=[35s)saet#Md@=V!!3qflU4K6WeL$:Sc4XSkoee"57
6Ws6IWGC3L:DqRRkNUS\jcXhPi%':LNQm#pq_@L:9B1]J_snYt[.t.P7cu&6<$%&Y
+bh(IM^7^j*fc_NH(Y'0BiH/7RHpVX02$2^4Cn)@/,hls@E"D[:ZrjU<r.`<)Y.'J
Z,J9>?MK$]s5D`8;apqpis%b=s7cIqDE7&,jT@L?a1gXdM@+1ZF3YZr@,EA^hJAJU
M1gp.26%p+"C2X*^u5o?d+!flH+(/J?$;VuA(,ppr+*adH]\<Z[gUG5'EsIU9U]n6
q+=[<M$IG.Ti?-^6t=Jg_`Ql&1#ZaW!-Z/.!<RutIe[?O&?HMa!Eb"!4@T]!-L+:\
4aGKrkC-a_!<sfpassS-!1T:P2ZlS)*[XR0.1;"?[QNTR-ib2-.nRT2D7m+)3;bCL
mGGrt].+EF=acl@B?t?eXYK4`7+iSd':?aOjdW0NC%$GGrL0WhhmW#-mfe25NQm#p
qbcH`p4@1,Nam104B-UI3/Cec%?Hc"fqS$KmTCK7Hu<PA=KuE0'7-LjeYcpG.sYQY
m_bd636pJM3#Z,K]s$n70%U%o*2kcffQ.m"Ia9>5nGq-%0`m_e65r#V`"QA!F5mOE
VrWE<?r*-n'@+WScZ%_S-G6SrNYuGU!%b1C@7$a47m#`HM@+/>gJDe?U`$(%R,tXB
eH8pDc9U6&f`P^#!3eGSK)A%*S`<7K_S9bifTR.1p[r,NI$d>/YXH/*hlM?T6IQpW
)rZ$17Z5PU85-QWAX+&:@+!cW?G@j)XXDgZp][MUq=s!29:`&;2m"A8RWblWMup[T
j0)>\Rl4<1qCucud%34S[OVkJMiPKP5#82bY7Jo6(c*^,SUUG"5$4>&V2_<6F\R5G
.4EpL4T1_Hgn57Q$eiIi;Iad@>5bDjE4jE=Rbsi\P0-.WLV0NVhbQg":fJLsRHpVX
:ZZ"hi#Kf+U?Bp]-*+4?3?U(+/fIg(Za([=&*34%RTGO=:^q6rE%!oopM9:Z\'5M'
Tp-AVfp4e$3)8JD#I'Se:,'Keiog[Bk7F(=1h1e1N?c4EGlVs5p7mJ]/Cp;OYlB^G
2r&A),c<8.KSU"52U?BqjGC-4(dQ]:2\5Uc86-<'Wugchgk^=Y31eJ8;_Qi3@7Ei&
r%UJYJ,Ji2@HH\aaID+.O/!W..Z%e=[*mfN&k<?NH/t(g(uRB?/;i!^B*e#'5QCP?
*-VJ*Vd:o$TqRJZHX:t-BS=ENMFK\ogZIP6GN+=I-h/ag4Pu3.Sf`@L_3,V[T[4+B
M'd/$J768E/Pd-JfU#3Xg5\0RRWs&5YW2BO:2&m;Nd!c;chR+i.I9Wq4g85(G*P2L
rah'(bcRj7ZlcWo93bVQ7GHq?]\dp.*5;a0^DG;&LW2Q\c]dWfh@PSTm&OarLRka@
/1oaAFnK5jl(*mD5>T&V.@7V9M14J\WNeH[NIFiPW:J<M-#'Xmq<R3'Q%tr@g##Tc
A!UFij[#KK?KL-*"[Ld#6ReABh%`)6<\.C%7?ToMhJgb+oZ)[\4QCl*^r?h=ikmnI
MpJpj7mIn<+-afVbrJp(!X/#Omf=ucn$qBfE<aA%0A8P^\$CUO7dP?[A!XE&i<E\8
_IO>\LoE.58AHf`M#gq1KEEhtL[upE%"\Rh7MrpoF%J+>5a+\TD'G!9a8SShgEA0L
$`u%7V@S2J)Tr*L_[e%5ZXunn$0SL9n(tmP?N:I(g#0@G@,[1H+<FsABL!GP!J#Oc
[bUJ7,uIoQ0]b\Q8D\lEn*V3W`giG7V,';N7%?74HF'Q#+G^Y6=7Z%HXT!KKGrQFG
N0#t:40MA.s8D\E@r'H(1,d4#c8k'p-_GdloLi@,8.XAIF_63@O1!"LH`X#:Il;9"
pg_^%rZOKG9T]SChK$qO#,]jH5Yq:+`X63;XWQ$3Ms"sP2qfn07-;-klA,Ns[%WFk
(*X#O$P394@uia9qE1h(^-7dhfk-`LgYb">?cGd2\roq=4!/<hSpi8hgn58ZIfU)U
;eg+YFEBaI4B-SCIR@'U)KFsYrH?>H/Lh:cb&54!Zc^18d5X'FQVHn#9[Ynn>'AV=
!iL?'mNXk7'RT3IXDo@*p0!tPpE:m2.Vs!o,+9^9n(2mEP;>cf%QkX7_?0]tm>Z*N
_`2UE**<Nadk7/YW,[_A`gO@UpS$FjWa#E[UIUA'mK;-%PN4XJb7/FReJb>#2S:.0
\YGhY02Fc,>AKb`FlW0JaBpodoB'g.n28K"2[FRRdDflkV;=s'B)%!;m3Muq%=BC=
aR(31%R?n'lcr$WnBrm>Pk8*<&UiiX@Q6o].k/eqGk9X)Y=X!Lp`&BVff2fCgd4Ht
4IsTUEVjm<e%Q%Ng/K[=:s&J?-#[kXT!:UoC#c$a@I4>V)gc+^VpFC\Fl'H9I.;*m
;5O*b]X$C>+4's&h65mDDtBrHX8\F*JU6QNQ%u]4FBmUkV".@D@FFmKal$mr:#+AG
b=^l^b/<d3Uuh[.R=H4=j\op^4NY&-JE141O%TY\j`bSg.I'>u=&Sd=9&m9n!f3Df
eU"6]etij:TOXf.4/JT"l$QYG,AWg/p1*t\5j,ZNnZS3UlW@lXhCa*qXZ:oSk%Wt^
_[\Kj>Xm,8`-%V,F#35$&*(kHiu[@j;[mOq2Q=\=+.G#q1#?#hF*i&a/BVKMed*kH
!?E]8gYG:+m,mD/ICDoIZ$lSGF'SV;f1N#bX>Fj6(Hmi1*5J;'GPf=;F8BA$@J6rh
kOnupk:+hQ5Q15Zcgq;1;F'na)OmYM[>7cR!38O-C0@Dqg;Z,86H4:1Q>0eWHg\H-
MWo.5l_S1E*sZnhe6eg^>pGn9Mrn\io$`&hN:/gJ<Q;LK9Vl6qq0Tg=H*l]6Q@4AQ
#Sc;=WgHdf?+"5C+^gL"c/-DE*dBsE^fFlk(HoR6:h;4F3M7?g%b)d0F?ZhMDCN1q
g5fgO9G8fZPQT'Z&e5U=O4G;d\ta=7qc_FjQlFi`)oImM#V(.NF[-[!9BC\E5WR1&
*74Mg+hB,/P1ktb/CFgH!TeiP+I*$tc_ChT;q]uQ%uVK:XiE_EZ#W)iTH"fh!M*#U
@jG_P2FfuH/!L.YJ_G+:k]sNf!,V]7rQY&jD]a>u#=h0eE5;^tSO9A'`)RXu71ZUP
<*>-X+U9^mGN[9jGODGuHg\GF?5&@cEG'X@nON#ki7.<fN#3^.)YloSXgF72BDVI/
3I]&?G:NLWI3;&P\?kArX]]VZ"\k%!4cDHe<8qI0.hj8YMjEFScDSq7mFmWGd>o=$
MH\1ig,=!48AfEuCrZo*[23\(Q7P^mX7!W0_pNUuphh08G-#[r^?7Nee#1[Pf&T*D
o4ZAL/2%r4jeR/=^?MMaj9'\)R:`J/f@>^V51UH3_"*bjYo8`,#WWm/iV*93P>A?-
'/$iV&p*?;Vja`shV-b5pYBG:*HmPAUl+NEb:[Dri5):/hnB_7rUnc$/$,t,iV_@Z
Y.2?=F3Zf*jR)Qb57b'XK4*?9@<.DbXt@*7_B?eMZd8Ht7j!/dflY\;KD9bd*!gUN
kL2+D)Y[G4Z#TZD)E"_+/>W3o<a/;DBkL<9WMc=C_hSa]$S8MID"Ej$+d(77lBu:V
.GsI;5QACT";-%6FQq5mS931NL@a5`UIC\=+'WFgCj6F(4c`Va^iHNtXgd/%-C\g,
ZfRKWRd\#khV<8*?&9Tnbr=P$Mo(84CpVBP(bb3+!n]%6NI,"(!6\HD`bI=?YR8"f
3pW1+em$H?HgJ";Y<FJNCTkF[\a?i[9[B:n%4fS77^'Gl3j\G'43,nWToCk<kh3UE
55CuSdXr#ja@n>-'IF5r_\p]R`uIu(!#?cNV3bNBgiCRi;Kb%&?7Q9=JBk(;0b1Q4
S"h&eU(t)%L&_)BO&uK-[pFOZASL.-CTV0fN#?-0+I[Q7M;'jK8J^HRX&qdX[F\^c
J>Id+N]G+lnA5Rqrql.C'21)GRkcid3Df?1>'0hgl4/<j#q)6Nk+@-PFlH@jj1=FT
<_#m5WYEO*5(38E*36dFdS!RV<XA';SNE<4-_8c"o?KE`q9(G+]Emp!hKpp,Hn%^$
HaYK7giDP@:Hll0?qH,r#j5=)pu74;qX*n&?f_8-d.t%/`e!hnF7`s4[%`klOS2q)
jcsHH^%X-^]EL]Do]1]B?>-9EPi?4^3H?te_#F#Y?`%&:DISlRie]$PMq!+85iM:<
l2^P;M_?uT?@&SmjmgA50.%1!!LlOCKfFuX`B73f>mqgE3L;D6r6ieFcTGYpI/)ZU
=56c^Vbq;E1p\X/SC6c7kFO!9:H\0#QqM;&br2<poFEsBMoDt$rqF/30H-cITcK/G
"rBOp<s)*!KJk/URr#Be\bYBW_qF:^EhIB&XXpR`#?3>,L@=eAC/M;+j,ZD_GMI1.
AolA$0#%,?-1M8YG6>l[H:pVcT4H.$"rhAdm^qr%P5*hNahi)ZC)haM?VHE`a?oL1
nA5PHUnet93)K60>'0hgT%=p"]MZ$`C]JtXeQ:"X7ilAh$)=s#Cl2kX34AO)hKc#f
&-p+Gj"?31?l`<Ic+-jp3:4*%b]1ZDB8-m:._q$i+>C(!i-kUo_[k#UdA$kMSpg=c
ne'3>R>E8ZW2.QP?$)4I.g_0i9JapMZG._+4D<(a0b`DfhgNa\QX(@hUARqb3CSJZ
[bG[=K_pZeU$\KB>7#g+*G37V6))Urb(25OF?U.TUN*KF*uh]X3jRmfZB4Y0<\e4,
&G+$pYDB/0IN"$cp,S?speM//$`=(2$j[*W?K6).kC[33GM[U6p&Lu'0:BTTr`eG8
:'][&l`G,J\W2l-jiGst!/iK;HpXWGj_7X2%;6Uh'KqLX*Pb-klD'D(17s$lBq(GE
*01i1<E<8An1e,rq3<BoYu3=^MB60I-0^U_jT#ZaBH&tLH'r60O_4)hiJ_X-Br;]p
V%m':;8=^j<X:PuU7r#pQ+!:q!;<H7Fjs:NN&/`bZ2qT>@a@:=Hum@PLBQT8,#2hK
BDbd;@+be_i.DQ_If?=ESiWC<?FMm!F?XQ%!MKDD*;ru]/)k(_ARLpY@mac>hlk+t
h0.Ptm'kl$@a^0KDc&@ON&/TXlCWS*=gCR\iIhl5WMZ+VjAN@d3*B@D>YP:(cTLfX
I*8ju#,d5Kb(25OMOm=R%Ud26lc<iFYkbe5oDm'9WlAd!%cDJsULi(23p3#S#$&]p
"+V._]m)k3+9LufIJ;Q"mGpVF4_2;'lDl%Ug]^H<2W&oRP"-L#Zhs1&Mphr4[6<I\
(_\5s^3fP<jb&3C32%?TF;L2D=M,`^(Db>XdFIc+rd*CH*74Mg3Vm"XYrVZckZ/tN
6HW_@#r3+M%!]t9@4Ca,[$,0!++F"Dbj(>BI.PTa&s))=OMu_InOMNA$-,q'9#]R&
/T?s6A77K=2$q&Blg]@]K1?n..ObV>*%6+SD$U-"Bu@q0Des$Q@>6Hhb.:URRu^iD
&$UGXC90na^`n[f,5Z5krq^E`BB/=G25$JA3bm.m3A6D@3!d^N0>H:4$\!*fJE^#O
TsY?!#nrY8D:mU\C:<"q:Uo9aqtfW^)sS9:32%@Q;^m5[i.(p**gh^k.]0!]n/TgN
e8q@hJ$g@;]Djplp.;P$CEta3*7<p1!o%Tf5Q,]/3/jH-_:G*[2,R8"=h&%T?'mSY
%_iN*#1#F'bjrjDJ]6[e?P?:oPD/,>eKb.<W?KcBrN@3AUSJk8F.h`B[,q?(O.g8@
/h\Dg0[YfmoO5aM>q:HMim>3u71ZVMV/!)$iW.$ME:d/_Ba"*AFdTkFQkh?_e5?p7
\<mi6!*'`<ja^?D]I]5TVi<Ug86107BIN'-!2$u'!/hN%)fE1%hun\7%SFkEcN0S4
4XV0F=8T8-qlcc0T-OfX(Z<OrgFP<2Z?u?6@cE<)/<]KfN$i**`?,28%*"DQVTYLW
)PoCn>E2r_!jJ2UhR.-#!SLRW.4GM=*%6+SXZ:pn78kkXi@_;#FjU;m[]Rs*4+[QJ
:(`@l^kN.0$VYdLp>1&gfOGFHX[Op=1<CdGO2=?5)JcDtVGXGi11pIs!1_S#Eob<o
@cE&a3+A]a(3:pX24c)VRVT'FQ?qBH*74Mg3<k$-@rq9PdB/4gKp8kBrqhUP-FAj_
:H4OQg!Hp05Htnh4'ND=G3eFoYAX42mk;BuaO_N9"-?i=rUnnZPp?b/b1.a;b;L7S
ES9f-br++[.9?UTRfc+*UC(C5HT\]MIF/.u9`Z0Zn/T7"5Pn[j%j!::1hbg_JKhHj
N#5u(?$0.],D)DuYajC(COPor'Le'Gp6]!,h0$\!McK94YJ8r\]'HM.?;,S`,meE1
GM-PoQ2S;OIJ99C.es5fYJ'Y`;HEPn-IXrR@NUaSi#_$>?L*!m*+M82YrVZckZ5XD
6H\5R3VKKLIB@`?hJTsm`2OF@V+:h]3)BaRZC(OUZd0QX0l?@.WKSkga0dp!(?Um_
8H>&p!mHt`15'7A8N@@E5gf1:>l\!PDVSs(S]$.p\?Tjra3uGK(e5QcKP5ABcc`k"
'B4Dp.XHX,.og(:&dR(d$5hTEkFL_-FR%/V2$cFl;"\<(YMiaHbQ7=pU'YHLG^<V:
d7*0\*ff9<*`!>"1J)8prV#!#Q#u^,Tugkq/SA&C8NBIa!#AlPcMf07[?QmX@1N'V
6+u02\^G`Sg5h6FB@Wr#S1NaR)YS^@T)h.cd!=fFBDV>h.j1/F-:KS0nu^,&m]XD)
C@F\$JA1$#.qB`>*$:>S+`[+peKb-QpO>$'SF;ICA0p>&Qife'UGW:\]Q!4?9/<L)
J7`*p5)uP5Iek`Ob.:URRu^iD&$UGXC90nb!(%$J'KBO<?%3i&;Mu294:-3GEEiPA
DE.);Mpd9%<a)*8!E`CN!P`kdCsO1$4QU@K`oDTpViB;@EAc<rN8oeM_1=_S&5\3G
N-Z$fRY(T1]FSX84O'%C=`QA0^uG07p=X(;j:,Ku;@Z)T;"QkREr_-<#5?qn`!_,T
;k,h@V8[hc;GmLaO)m`#Y^E9^X@D7Nmj!URF!bZI:mTJRC-r]Nib>]&[r-4OrK^Z*
R?_$L[ibot5&H<Tf7%OrIdF"6[$iP)"0_cN9S`.t!JjcS%R`<RoK6;u!1VSs'<]FP
=KI`$^ujZ^d/tq,W>_fL3IkTH9Qp=*kp,=`p"flQ/DcR&Zk2g8*Y[!.mI!V#]d-Ho
8d/U8^TBHJiga4HQ^*d;E?*@$1la)G(T./`G^WW;)Rk;LKV*MfkIas+"lUlpK+C."
?+P-?m5LQWIdauEQCJCkbs'L[lCS/Ic_CpM@.Ef5n\l<RX*58nk$qcG""[fY)QQ^q
J>j-X`.0qnL[(;sNZ@ahgoFL0KBM2M@dCmm+[^i0S@Q,H%QfK''[E^<W^'-9OMh0j
:Qmce=Q.tpNR_CDW,8la6?nA@)RfTii\Z7ZJ,WUEgYt/$dRbhZO7ZL6d"VWkc_GU`
?ua,:An0P/V_)U:0>j<$c5E-h<V!B<)[3JA(fp8/b?(^`;@Y)[PQT1N!M*#UUJJ9>
S"h(5(!6R=5j^O-oK6;u!/p/]gkoa4o!OhG$=NIFYil+RY>gLX*)I+n#F^\U3hJ<#
T5$SK7mC`=PQT'Zg2WeLH*f1(/B;`=(bibL4nma:SAhhgWMc=;Y.6Q+H(TNY.GIff
!Gj<&gB89T^tKKq!QkH)J9%;O32#kWF*+e_@rq:;[R*!I*2jk_MOm=R%Ua9.^@&Su
)YU_Upu7259KA?*UN7cNBHlClB2!VA.KjS$p""0_@l`A<!&bq.MB6/FV6Ym9b:gU=
*oYptie]#mm^^,)cIfC3K<RooRAB9F=9b&8EIeALgMaj_4S[ieB$d2:3Dss(P^9?&
;CgXPo1dnNZdr;qR8#Tm,Uloji@LK>F3HAE@)h'T0R`T@8)hmIZgMcBV5,)ej$5Ka
e$sEUXB5sSA3[(V1o?jT:d*>TBb[U19]D"cf/!X=T1@]<lP5OlP3("1g>&hqkKQ]k
nbMufpJE@7^@8uIehpXj/@ji)p>>oL\".-"BrhEKAX2TQXf/KVPc,LJEbC0]6Ou=Z
qN:>lh0%=-*-U2<XjbKe^G!=rica7qJSjC'C4Pp8BAKgCet&FJVjhS8RPpq4lB9)A
gMXXJ\oV1h/6mGYKh9Z!&-'t*rZbu8&DJOM_V>3^-'"./+Gg3NQqrpgf'qZYd#n:*
nkeFV3?qPc@6*,k\FmdkU?BpmCLCLpjV?1AU2?H8VO7hurTgZ%2Lkc*[s@,(B?W$D
r*n5^F%t8(A+nc+Dpcd<6@?QL#FNIG>>2p*r)4&@*\J>h5;Cuec^1:FZ/">l=_=(5
,_u!;5@=7FRb^*tb[VW;240C_)m-X0MT.4JQ"ZVmg5*<<Fk9n8oM\fg][&+-9A[=>
Lc9_VE.__V"0cf^:D%kajhX%Jm'G$\EBDQhm1ri8&^emEN)1`q7ua!-BR;>s=SRbp
/K<0UAQPWK<?A/&bkm9s4Nu!Jpin8!j8%-NTgd;&2$^@'29@uOa<Tj&F3c_2j$>p-
n:TD.Vk)$t#9@=T0H4o>TnFM8nA/SZGKr53R/,p;he^%&jq=9KT*!Y->cKE,V+(mW
.AiKLr;QT^EeYFoC5-GZ-'g6T!PIp=$\sA(igRd2q.L)(8uFP*F4XO,@<'=`"DRDL
Guefgb/q8O\5,<aUuBspC'*%`H?3nQe%D.:\)0@u8mR-pjLD1iL=TdEr-MV,"i369
Ia_8q>5bDj:uu,WQU^(F*\PFP;0a#)QYM0h5*&aE??V;Co=FXa&GPG<a1@=Eqo0Rn
"=Csg^](feRQ9]@Eq]M0n!A&CcY6Z2cL/=5DOj_(+F]nCq"e%FhH!3LD*DB_H.,JH
8KYQSPb_*m]Z,>dZ/OrJYJ.=>mC/_ThS$Pgd\VkE+MrU,q<.`sln?\ogMT*0:OX[_
GbT>=,XL3iDRm_Im@N_#\[-FI8:0a3f?,nnCT6(2/$EdFq.KE(]C)tB+iLt`:*gDp
\at[F!XgP%Bt]q@gRhsLhg^.A^peahmC04Pj)&Fr@0Z&kDO/e;E?@%]*^+hVF[o'W
fk-_uc8F3Y[Vt';f'USAFsfd\V#UK\!(fRE<;O=3D7.oqgBT?R`0B,LASUD!G@#!U
4/:=)o[?U!#'5.#GLQ9Of?YLbm'1`b=_G./?[fP]MuJXcje%&%Z'`YEKd'*tr:8%c
_1Mt_PEjqtn)%LKKmn]9c@SBSDmR\H;Fg#_eQ,o-5QCX[_VG9YK[Vk_jZ.lD@g!HS
B9co]^3E5]d7,'H?LC($lh8_!f\qT-/n%n.&rAe^Y(>L"FMrtIOqo*FEQ&[$>ISMD
U5LXe0`Io.5K5-n'RfrI\)1At6-M+-/2FuN4l&CFiJY?Y-*:GC@uTcaj,Pl1)%5k[
>'o:h2^XQSE#nS^j#GuSfo@RKF05]PWn!.[%njC]W'$$*^FBcC^B7IW<b#/]^PnoM
;+sD/,%$Hpi%Zh/"W(Dd+/Uj>32:jP0"'2,Q>?$r<&h"\>]\6*6,5&oPuh76PlfTq
H7h@Cn(726`B?Xt6\#Zh"q3PPA5GN.^cF'L?"K:$j?q`D)D;!GWDb21]N8>#'IlWe
^A-Ucr[3405RE6+qs:Yc*'bNdcTV#)VtmgI8XP#Vk<)G0T6]Reel`2ZVra7l^iBqj
^eQuY1s(fi3\(4KUB!GBgZ4PoD?3Y\eD30`;mOH1nI0s0Si!LO^:KQP^F3c;VXlS:
YIWd6lPt7R!$5hScd$6dFd<;Rs5&+k=m,]Vl:_*qDnN>["2p%Ge58`X_@M0bHflYI
b&s.j]>kt>"QbClU35Gn+t\/(i>[<gS]bj*O]ULP_);-qBr.(G*uk8@5TG.$^\Hdr
qr<`%$LfFXkF[5f8E63c8K@RZX1Y[P-3O+:YsK>"`f(c[Fb\dM<hAq<^m2R3,@_%q
al3M4h)UFWr)cLBZGmtrLN_-A(-Pci"&s>;T1"NVnr/j8Elf-%lHJUse';1mb2UP9
f3]U]DPHgNqi9\:IF"N`@rn;HrM]:+4FgFWQn3_e*i=DlW][B/q6oL4Zsq/B/!:*3
o/m+7n.FpVo=ns@2V;Di2W8>a-CA0Bqrjf9.Y-o:1$\Sl!EmHTklitq`..+U5e)Td
!;;@-cB.Q-f!mciEsVq2`"C:hSCp4/E(LGiggZ0n"HWV6!"ke&Nc$MYJ5P=?qsM(Z
5@`)V%\3o`K^H5&D?:eLHbp(:8/Qp^!a*<4/-m@`kL<F+/R`O(V1_9',9WSs)=##p
Vk8DfnY`".HATs06(Va*+i#8qVjqdbgp?:e^":Q8fY]ktcep/Y"255-+S7<jQbE+H
bIW+o6$rYLH%iZb4uj]'J9O8NYIcT5QM>-)+[A'PSb^#rAhU^U&m;^e+KN/R^a9NN
,n+/f6_j#LCg*G&/V'FH%8SMhi)o=,QX?&OLE:b4lKeOfT(1F=B2;+jo[?T/*e8ao
c/M)'AW;s;jYEDF3rj7+b5hSo'HK+FW;im7!W&BPV8hX_[JEb^iHP@'nh=5GW]W*a
enib&5a@,t3StT8O&df7I7<^We>tVsL("Bq>(@'h4ekK+Z6Ml"'Fblt,_1^N&4<dg
Q"Ta"YA\i4C]2b_;EjX0%+ksfq2adIep2g@*6^#iJ#!QfYFmS""g@tj_rO*'VS-t;
qPBNb]&XGMW+`3&HKlq.$S-`]mCVi$&roH1C\>OEq2$JjOQR\;OOcEmOtb+=+Z+-h
b_55r!tUVUJ2o"b)DSkCqS5*C$i\NLEXt/&j50r@nc1)3aTHXY?%mL9HM-8p!5@L+
kXpNT^M$mQV0DtFOA]FBd,aSaY(]c5]6"N/j;Ak<?[#jqb]"`7DcHQcgeX=*@U]dX
PntgP!NKi62D%_e*85K.h02Nfra0ooqXNPA3R@K<*1D9R!Y"l[%[LCD=^ORdhlO)G
Vd)(:P`*$5@DdiAGk#Chd;`+L]@s.A)N`&AqLh)0`o]OsrE/;GVXe[gJ5pl^/:UY@
VLJiN4KQm)[bQ-bWtc@B<aUt;:os:1D%T99!"P1_@)!Oupe?X0'^k:V`K4,M?7DKN
]"Nb\XoB[uMo#Ob\,`<RVjpZU])(]m9)pL]9Jh/p/L$W?d_laD(0u%0\4?8*o?NP?
fM<NbZd(U)_U0-F/SH!:ZEQY74g6(]-7ac*H0:`]<?*FW>"D=gTdXSbO",KYP:-c+
L^-HQYbK)U3cq<6&3YP4lV!cu!O1WZS(NLSAs.S_j:qo-fiQ?Q(,+)AD("jua'X8f
<Qe_*0Vt%9M81J,Ucc=>\N>^.>_S>V('geAn)lgnO$20l#m49FAH;$fPVlM4Pfl$o
^GBHma7]nUcT=1*.XbB^lEB0g*:Woh*(->T!XHm8a%G5DQ&"B#XNJFkq5a'?rB!j;
@=?G$jj'W(Xf*0=Mmh[,P>AX4]ld^(I,pD[>0_t!!i>"3(X9H@`]!,R9)4,hpi4=p
=7V-!Te)'.CuTN])>.Cp."C)iQ2QPmUR_o/Jh@?P?uf!\1ppc'n%S\cAX?[LcZ#<e
-4e2M+'U"@p$G)P$Uk(I%[6%EDnZkR6Tb?)%],mb"HBfN8kQl+)HmDq('.eJ$lC*p
pu-uMQ@&`/n1bEgHLQq13_\%k\pHb:9HLk,=B#\I1rqne=liX-Yg`18B&I@W_h?U(
ZCiUrbqo?V!jLXgP,DP#FTB[Q?@$=i%i9(:'HK,t^8mEbr[Wm/N-G8c)Ogijp1'rf
R**>:!*84?KJlF$W]WuT%TI^UTCZp1o4V/T.[I0M,3=?rUpt*N][i'iq7nBG%6*&b
:/ru89M1d5gt+KC+g(aVg3dAU@3#)+Qdj%X=RX06@,d$"C>t't[[?6t&WU_L")l#I
0FK4t]r4'2Gu'f&3p@mrs5oehg'(lZ*er)+@Ns-cKq\P_B2$f&Csn9k,g:9`)tlN"
V`p2$>P<T70Kt#+49^!>m*S<F/b`uZU31Ir=,Gr`T>gt850TaS@j^IMph&X:':S'&
h$?MDL_d[FkK`']fZ25d02>o]c\;(=PA1(;g.M,DV<.OJj,Zj(WCPTW(em("(Jkg]
jr&Z6!nalbP,DPI4gWcBIIbK-G353*%Qmuda,NL8IoYG-mfe25NQm#hoqT[InGlVO
iBk@R':$<^%ui,dHNlpR"'$CgcICHadIV%jP1<VZ07Z`RGON6>b"&DVO'`E*8V8Bk
SEa'_2B4?uk?hTP=b!iY-D0c=9R1WLD:t]LSToD[Ms2Z#]Ppoh0ddO$1c/0Vs,A8=
#\=!X30FIt0kR\XGX:[Lj>i,E&9V,dO[UNJpQWpD*&`)ZJJ_eq>u0<>fP;Wb$O*VX
^rKbZncdrr6>K9.BIebfA+J^lcuK!Ra,>]&46,iX\D3jqoNF;9P!LVc*@GjF&Cq41
=E9p)(.INjO5VrCqj9eSnu3F3R,a4d@F$IM!KHT9,@/Y+qmQ=kiB-SHcBEL=<M&["
0[IFfEh#Fh)9-KY]^\URju4kf(.$T>8po?Q3B<OQGM]P`pS(Drl$:R')CWr,o*ZmR
:YP/dmFntKj:V,>CTQSGGI,OPPI]-):L!>@%7S<sf@Ki/qV-!0@/TMleCYb>7R*n8
<-d]bOu1jGr)J$0rZ.s.d#Y"!qCR"7X]Vn*MM+9)-.dYS]VP+\N/8]"Tj[qZLKM^Y
A%e''I2ZJMqWcB&X%g"s":2n5M"6q73O:P7J,he24b2Yi*I$9^c@Bj`KJnniX_>l*
M#E>67ET(n)h@#VP>M<&VTNQq!On"JJ/A)>!>hQLGn`LJ_#Z57$t-r_UmT#naWla&
&]^eZs!,SO&=9Y]<Yn*O#='ODja['aLD#VM1Z!TfkHB*uhSGdj!%pdpi4''.m>k<l
*asS45T+Ft^%1#s\S!'6M;mfP=YO#Fncn1P,ADC(3Kl9lB`2o0jQk'b!a<ktiBW<K
UZUZPjfunG(a3hA`P"2.rV,1[b[o271,d4#c8k'Pm0N>W=rU!Cf_9N#J\dDT`u]T/
UeH7rE8((sd=D3>59*@Z#NsracXI*Udnr@@J$R'$ERN"k3<G[):7nj`Jg3CmGS2#U
`)irK#Q35S:2*m(7rb2sqbcIKb/<`$<I&8rTkE/i'7<]'(`k8gF'\E#qCe<*1+f!N
#FVB-!3tmti<0Y#(oKMPcA^Dc%rL>jVN(K"1[[@oj"qmuBig6L%5cB.dQ$^5iM:$j
47B'[^V]-!<E:>7pAJ/JHu^R5`dpVt)kO7YACNT3@2q6]%]oH`e6ci8C7H's3&=Xr
4T2^FlW1c[42]RXo.u@^8T+.4g]48N1/9?9GX(tET![T4:HhNXCRe<Zj7_ra?T=&:
k%bt+29lUh#^.QB`b@u?hG1[ppk(Nm,mQ=;Hm<RNm3=M!5c//ZcDrhldOd#7oN=-c
IHSCT3(U2&.F3Qio@du`8U1g@)s9673)FAF6:L<)hg+B*j7_dWVgT$&[AdCZTT\g]
9&A\cmoW.3f.H\5#NC^Fjc[CM7U/hdgpeeiTJmn.JU3e]4/@ujOD2E#UWUL-91E.@
]Vb6rje9i7P1QLIDMk#UCCXbJ\9DR5b/_!?Z5=o14slhQRXjXMYWGcQj0W#V=Lf4T
@.SB>kQ.!QeE2\NZt]Yu5PsfRk%gKqW)*uf==KK*Fd8B?VfgN1'j!m%Z!u9U6Cm/j
a1kYIX^e2QHb8Ke[,q@SY!TbcbT@LFm=59K0`8>6'Yrkk?I8j+?`D9dMt)N[dd>T0
V:B?F%VUdkE^7Z;?;<@a4Io7eYKu3CXSj!VQ2G&Oa5uJaX2i_pd_$ftk]sNf!%d94
cDKE&FO<P>b:gU=HI)!E1[ZXse#,t`0q/Rm<,fZH!S**BC^!P38s5nR=B-hV7tk>2
i1(/mkM]NXKrOFLkFO3$bB6cYX\'UQ5fZJ;F@$4660H],AoO$@f7'f[d5o<J`j\uB
V.6@tHbJWgZn;>p\D,Y#LY3u#pmgB6_R*AO@)H5E^+O_^-'tE'PQT&/jZmm.5j-VY
k[3_tk3,<PKlTF=:cf.$4ce/7JF+c9.Y,dafqJ^R>,a&P*-9=Y`Z>(gS4DPFW(m(=
X8TNbI_/]-XL6V_iaA]6R@oO;%Q#mFW]?\00cOobZtf5CQ9;*+'0<W)=m]:9fYJT$
fdd:gQife'UNHfLff/,TI5!n`n:Ps8Flt4mG<A:*fr>$1*t*uJ?tlGI*BM][j$*[b
](8A>U,M,>[.`PYf,[:igi4`SfW\d1?AG#5);6M#5SJ12Re(5,ZEJ/7</l?#P6Z6J
L^pLW>5M;@Fs,g&CZRgH3)K60>'0gll`IY=r]iRTs7tiMEmt;??QjXEX#^":PNCF:
cVHY:F-Oto1XGE?.f*-FRu_DT&$WE=foO?`;>QY);"Bc20A&DZcpQs"_[akZUb:](
[GRO//:2#4b[E07P&`fJd!-P/k'Ym-ghE8s=/-kdj?X]^<$%oV8"V48PQUTqJYM>T
WWQ?gl^DUl.Ha>FHK_&7dnMcdrN=I0pRKoJQX.hmJ,e>Zf4\Rt$lI><]USs*Ykbe/
oDm'9CAq>*7Cr$/)k2gFg;oe+dRj6J2H\28m^gS\53PZrc.$,YfBOgjPQRKZoff#E
HKoE0#O8]=<?A%3Rm'g^-jT$m",5'rDUkp7E\+Kn\T;$!qRbp^HgHD!:2$1F2G!T=
l`]%H(0EimoD'GLcp;j)W)<8I1X<5-d?\n9Q5,GKo<"sr/X32;Hud9NfIO,7_E.(b
FW,M`n/H;Y@GPopG(plHYg+JaFUK,=RF0`rf3[3\s8D]caX<^f:(o;@A?NK*Z9<O+
YkR%)^SL8S^VB0m]t9hYg1fr3/$<QXH0,tNJ+LoDm=>K`BP3iT7f1%10A'j&?.R:_
n%<ho<EGIXDK3VOH0:_2Qi,HBIshVF5(%Ti^0,TD`9uOGT7:aL-Z.V79,G58ieuP)
:H[#co6;5+I\4Vo?_ng74*R"!>^PkGo'!R?I^@X5J%]u:`R]Ta4*^7&]CaNEgUZL=
g\Nln&,fK<-jOM5JSNH-[;Tc#f:\o90hrd#aV^:u.M&$GXjbiY)[D7l7laVI,4ZHT
K>]n(!0h?0h6mHF3j[cXn-WP0kJ]sfq<+AW&f,qfkM"OsU;jW<U2'3)nE$/R8\```
cln/a,2e_I\APDM4$LchZd(TEkGY/9'&X#!jSAfPmr.*5s*Xp"rVH2n/$61A*Be_U
7Hai(S_:,fX4,X6q$"EoL,d@-Z]$H.S9<CcP)n)SQLsU:HgYU/55Jq!9?T8pY%6HQ
C>7EST3^^h!'gAIZ_^@dNGCam=K%X&Wi>>X0>1orq<&jY$$AK(bVQBU$Yu<q=n5[6
_$,N_LECuTFWS0^'N7[KTV"?2PQT'ZqVVAB/q6KQc%1oCa#J@+-"C$_<I(P6Yd*(:
XaM^>T]g[.@`dmcOp=+(j#Er"(;T4Q??tWIl]0.#+]"[C:HYn1i.2,bkJRJlL=>q)
jo"uO[aJQ_Uoi2.PM=,-rU'\;p$LG=Vh@53o[?]dJ0/pfE5N.HSj)?:KG.+Bqldd6
g.jj-j8oU:rUj78TCZeKER;ip>A^d5g^b8X7..hcjr<V[eL_\7^b2'Mkc_c#ZLc9r
Nr[!Yq.A.ln;R$j453m.7iRA@G`+/^OS`_gJ,fIk!T&1l]sg,e+74&[`6q-']DYJ*
5FaaJ`1n;siq=#jl1@;&TH'mn#HBeVf"SQ:>D$\_@oOMbbq'a-nkeFVo=fA$Z=`,^
dIV&%!UQu$mODBc%mJBcq*snd_[\bmJ60sQ]6<RVYIj56P&R$Wn#nC>f`jjlmAVG)
SpKZNl2*/b`S?b?!%'k6^k(`''G]8L"WHd.gKQ7ZQkjb&M)*#:,#@A]9^_ko;boPV
_Jd0aAdLg$8bl2SI'`*qaY;9J@J])P?N`J)(2^h$^Yj\O_Fa+.qsH!-`3f=,\)3M;
j,Q2RLdO7<hnAd@)hdI0E^2W]HOa"r5-96KS$rUPkXRl;X#qA7OlcD4o!!Ds.rAF)
EM2N@[-@YbieoIu'21*2B[hA$l6RP/^/:7aU3R-!dXr&o=A0t@ZJk:nYC.:j2-e:B
D)M,W?W195?uNgYp(A,FYj>N3oG<AdfZPq_>iNNqm^n=8mG5C``/+OtGOCuD7l6&O
1PsM<3j6;]:S)s?lAAa5U5LXm=KcE8cTCSXW@,JB9]"S#S9)u\n%A7P`!HOu6%]A5
(][f43M7@j*tD7k5-:GX2d]:Zd>q.M!#MtPN64MQLX#S%BoAFF"%CP2<<oa%\2_k*
%Iq4$(_qDjeQ2tuQ.<@G\)(<JiO#Ie^`&4$bA#OY;,k0-aep<cp5M#f-t<AhI@(#8
,=dcYTHjN\6VOj@o>UWNO[U%JIA_b]aZ&PGK)MnBPJ+J7]'mB1j>P`kb:^D#i]GKA
iTSjFB`P.7fFld!NH1\p3Ddur[&t:oi0C?45=X`8/Ba22;#m(UDQ,a7nA2'R<t7&8
#E#*CCB@mNHgN]&hgYIUq<+AWp@k]$m^f]Zd=]_][b4-?dS)^dUm=6\XZHp!>p-Rh
`\luTafKYCq:$I:m2[cAs8;HiqW=8c50LZ?:H1MSj;.:fRm!WG_D)[?SorUemHLO@
*^%`3Dq;r4*fe>]Wrl.-`f.0U6dbT0U5@d,;^WYmIdoBk3.#ia^m;2oDj1?HblQ[*
rfe=j"4cVUW'#T?=Ydu!=I"[%\(%?F;IdIW>5RID5gf1:`KJbQ`.Q?]s7Q&%hP!e?
bGrZ31m+#X='eZDoSjkQed%%q0D7\!J5jt$kB6"8Tm#A0JTC)d@5qZ3[!'J1GI38[
[TKcc'[pH]J,%uX6(\&W:VRlhK./NMP/>.Dg9c76lAETGo]4i;DdTI_a8\tK.'EO*
lgbKDg`UUNqsHPn%$M`Yr:.fR:HUI\np=bm)BZ,saoUThD)oE/c_"*FF.aHM(afj"
A;nYuQ%t@tAngX:M$$2mUD6F&?]fX>Y.fA!^9'4o.VW\+q"33KO3&9DP_\srF%hWW
njq0<'8BPZ38T9AB"g@q]X*,dSe5V#<E?@hs895%jHE@Bd/(=pFt>lhi[=l8pcMc$
aX-<f:H[$Z/SJJ\NZFt'I.PpSUN6F>PgB0GId_#Vq^EVjb8cd'aX!(kq6p?1]Fs6^
q8F.WZqDsTK]L+_[a^esAq2u=0=9(mlGtF.M0c?FW$)EDS5dBUB[I!&TVMB=:*/J]
0e*]n*0mGmY^h;-=XXM9O97qtU]7'k0%7,J!=DEY!+OVqCQZD\ge4me2RaH%Y">%q
?gF7YcCEIqj(1i-o[-/N)0beSEK66A"+V]DdVdicHKN6iIl)5j0h6&e9(V_DOnY>`
^1j+*ZZ3e0#H.RL%X5(XEIcTLUSUlKl9jZ`EhGTVcm\L"I<)N?C/sa$W:I0A`er>8
3M7@Jk<RGdVukUr5.>?Ad0$I])6"'H%O_QcSc_$G2THBUIVb$ne5dt&PQS>R5gf2%
!nc6"AR1U,oDkr87V\ca"3LZ+5SZ8Oo4\r,>_OB/+031f/ODIj*,''s'KqL,J8OT1
;L[Y`*an*]5Z9'9PQT'Zk2:d8VqR3V_#\D,E^2XX*,$E!MO'#)@,'9T9p`HT!S2?$
dKV-*PQT'ZS/foO1af'`4IYtRSTg/r:H>'fW-]!g4c_(CXns`SD?Yq>@+DBmQDPWu
%O_SILBBT0ek]Y[V^C,YmGXY6<=UD^PQSo>4c_(CePT>`JYEBO8`k>o*)I+n#?loc
3hJ<#B59^i7mC`=PQT'Zg2WeLGuOf\mJ=+@9.kO@eR]u5;B<m\NaTH\RVRjDT?teF
pY6cm<a=c,60-<kPTu!qG3p1a,mYGE@Y>%0"h)iO/"+?l>>1X'qWb-DNAo]JZd1hI
=ap2.99*Vqrqbs*n%\lDjKngYgRHr8]?P0%iJ,@CCE/#n7;Hs0kL8SWJ*k;=kf7GI
U=QW3p5U+QdVr1DWiN:;-D,\V6l,^uo?ZR=)fH.V:HIa9B'5_/%doPAC7Hgp4*I]N
r:.g%n(ta1oQm2N.!cq7!39V0KEFXRY`d6'VWg*kOP=NNXj"p<YA?rtq;eQbpQA0%
0rLUhWnD^aXj,[GhedPh@0a>=WlQg)ls^/0*c1]Hm42&b?[mL1_?qf\h0.Pt$lh5\
8@J$)$_+cr]#uY/^]G-lk*]kNhgYII4TG?Nk2(IR2'758JbeK$ImdZdIItp!dnMb1
dcs9eE^8g:k3.0Za6)U+C:9kfZB4WY>AZ6#:h<MsWMc=C_hSa5A6>'4++F!Yl-cDd
/Aa$Om':6/aX/f6*HdT799ZDrZB0H/3p@nm!5@HM/'N+a9c#BVmotkU7F._9?s@R]
V)>gI!L?cP5&2b\TTNJlSTW/&l`Ff[4ndO.2i\X1[F\_h1nd'Zp,$GaHh?N1Y.O,5
P*P*I`;m+Q4Rdmsm'G#ii.iD'f^-*)IV/WYpGZ#F23mF`^V>'UPul1-9.a^]Gi=?!
*Z%m`Fd:WqYIt(S,.,I)l(s_)\(l"^P[+o)Dd&/'3hJ<#QYSfD7mC%T't'?]/>ckc
o_I[BS!RK2=dm%T>&0N\A&anf?@0pj4Rp@,=Q'93J.n@5.Bd!9b!OMuF3H?_1[i*Y
IP\eC'DO-O[m`;RoK9,R[RCF!;R;9&?qKHnGk5pJ:S0i5d75990>7!UeV+_>]6!/\
#.(4OhK^Is+4FSMp3Z8A(Mc2L#@L\W53.em9W(XVUm$9*nOGC]4S'Cj[(lV:CGXF5
1Bj<c-a[g'kpCK(@>C6e?[P_qM$$M\k(V*Yc-c"6O3Q(5eS7N)AKbp'o#`K-hL"]s
Z?Qb5"Opb&iJ!$_74A_^Q6TJkADpmFrFNQ_lR#Y8-_>QlZq.lK0b+m\O&cZs=\Z`H
s33L[$p725CL9n69E8KB0;MK$#DsR1aX-28B&^Um?[aFH&$t64%mR_dVQl1=X::04
BZ_d%1jeZ$B??nrSp3TGV7,&h)ps-2LBelFTY^Qj^]489=`1e3HuSQo#@N1>TaN]g
Qse<:s,QS.8SDTh[E0bbR%&$.3L#G.[MfDK=@!-?2(f-@*uh]XWa54jADtQNIr+P_
j,V@KUKLlMn\n/\&ba9jO3%(k645@jcbBAO>?Q@0@"Sp4IJ;Q!&tbXQ!*bIgNK](W
Mhs/(=_N9[%TdCN%MV'e<X`AKR:R/]7QgYAdq4=PAuP#:6$%X!QC2BWfmNJC=*7g#
>$%lj!ESO[B_g3;^hK^;Ar\t@3&>[?:]YHuMSM@5KG+d>O:[GI7unF)H1op($OC;C
kX6(Y<)UPj0"OU5PlsQoVO;$7fj>C&*].PlQjN5nn%Rqib:X/D;>r#BS0C4=gMOD/
_Ylo0!'B(co9hJe=MnBlp!l7*r$D_eb_V[2BX:V&E^8g:k3.0Za6)U+C:#0[(/cd>
8qm`l,25sKdD\l`EGrP`<cdfM(UnC/KI,#r!<Y*XN6_gEDo4F#]^q$I!DN*e%fQA#
h]ctT>]@Lla+Z]_*.TV2XsV7WHr8f8,&JikYClg42[>537k4eJ3,&E+o!,^eRVUJ3
f3*r>:E(rI=qmfD%MV(AP"X4Nc,9Xqn=jcIm^_N)1<V3n9ge6"USDP$SQ8FN<a9W5
!OI#=7&](DYUJZEHiP..cp?Z5if#\=#ZqIZ"iR!^rqU"=*'F#rM`_!*e`pJSHC;8"
ITt$\_g*L6D>!uppu$eeqsV9Y;boQ!3/LtN&-m;@D2uomIVb$nX@=`"A0L&D:5af=
1'sA#>f'Vdhkle5@bP$#brFaBZ@Mf7T7<.X&l1LGK]:Sa\J1l"!*bIg9p14V4S+MZ
HaBj:giLf$(9@0]`.=ZGd>@rUAc[/2>^c:qc/k:!?IrJecT_6IYo8#BHEV(+?/Z]&
Y35me_kq+p<TJ[;d/)ge:X#>Mc5Dk*dj"k[(0bSuq`tgMJ@g$_I5b1gq9VJ>AQhZ!
0uXi=o?B3)b2D:5CTfV-n%QCnNF5c@'6=k/'eA0lcmWH+=?\c"4m"_T\:$_966#C6
m"K#e/@mk`Xb5Ih0*cS_D2u?\IVb$nX@=_'A0GNjXTY&JD[*l9"!i^FVk$5&MF532
+tkL#_SkteaPoG`p`jb1KOZGn$Y+(5;o0s%!SDGRC6C,9f&OFc#ELi<<,,\K'KqLX
$t-jGjr8S[d&+$f`:4N68Ag/k1C#"LYef\qrV,2&EPPJ5orWA-MB605DNC)j*=aX+
a<IqI-L0[5CHsmaFk!?eEcrp-O8t;\$XYl>^iV&cd+X6!KSdm!cJBUCZS0#adNH*X
"8hr\Y8caDV(;Vih!sX,T:4MQ^HJ#bmZW=t!='SeotWZu;_b-"jFGORc-c"6O3Q(5
eS%C7/ArG5c0-gqr$#aja9B$.S::>!,%G5SD75VmZ1TG[9iU[;FMksIHX=V.;/l;Y
@*9Nok9.ME(6`6U9ggE?^m63HP@Ph=JNC%8Q#kK@>*f=[c_D3W=Ls"n76]4'eNqAU
D]k@4%ui(Q#Bf.g<[jRA71ZWpde%7[Du_7US<Jh/2t&ST[]qm;?<9gY3JN8J`5RCS
j,GuMXSIB?<h8cd8D]prg1V^6p#Vqlmc]0X!/h&H,BWFVN7KqJP(`Oh476d"\D[XE
'9#pl=X>]"L:%!dF?XQ%:=al1Nde'!/!=G:pB&"\At+VsUb:K8G8Cp"A7UgU#@]e-
P:unP+Cm1W7$oTJ7Ve7J!,OZ92+\RX39o5*X+5";XHZnT",5'rDP(+EaD!VQY:+nG
SCfmILin&SXo"3fDnYgE<W=J2ZDdqKnb$pLj4`&'<_D_(ek0f1[^Me1rVH2NpWW`I
+L<`8pqjTKb<"fX6'tk.[ZaKN\TJCBlq]kE'SI9B_)q**b$!nA>dAEG/$(O>[LP\Q
B(&EGX]tU=oA"n)l[ZKfAmE/.nf'Q-?uXGGqacflJ+18Z-/n8S=p]DE,YQ#IVR8CV
o4`:<\+X<QoOBa^&LRr8f-sNa*qGj/3>5b^&]Als8dR$5hd_^1-@*3,fH<h2^8loI
+<?,h0:]pGGtu"+jcul<ZLGs`T9O`ZIc#+QHJO/m.!crr.%GIE4/TkU'3uKO^4Q%I
9:`#N;LT,NI`n?M@k%_bFaHgDr?".HE52smIn%:EN#3.[3=gqS7un^7Vk&":c7)X&
?GqQHPZjtr[I35Zaj09(Oq3<+_hTUO*sZ3B^%Yj4pQf$$Bob75#l/P--3Ajk8T@=.
8O@dO72NA<cT\rEoI@7$#BW.HNkX+oClWtG7P!J/+m$:Vb,o`0)H=O54VTp:[b4dG
i$\jaidsVSFk9pN3iaXor&@gAbfS-ps8:GN"!qQO"CUiDeKe;][bjV;h3ObQZLpM!
E1lE?Zk*3FleUDVlg4;HF')nB]t8YOqT;k)(Ms[o;[;SSSWq:WJFBQ0;JGJukCD<&
A)6!@lPpoKXDhgXg.n2""WC5Z301_XfJR^1a<4fO(MH@OFQm8*H*VSiDXG4=rU88&
UB&l545!1QSQ#`pIi#u:c6TG9^Gqnr0*'GG9WKGAhR"=/r7G_sQ8_m'[3(m=5<H/.
EO$.X.q?Y;AIFB=*dK&J]C!&mOG2!K^AH3eUYi0-%r7^RZ#u'@;`26[!1!uTOfNK-
OL-S8,56TbnOIJ^>*oC\c_Km]"7%G3e79OIgd]!!pnQ)*k.ik+>U'_-E5I:?r]&nV
G+:N<m4"#f;f3GDK@tIdH$<DU[Ke]@/^NJNrGY^9cD^6H(j4&b-Vo`N4<2`DZoRt\
qlr0XZ!+9N,7?Nk#'h'Y+C'"/5Pse'nPeJVf;*"![g+g]+A8lWa[/*34%giOS3?>R
o>92FFUN5_k]p,.C^U`IZmHSP^s^BRB?eHt\+`f2/a#gY7\HIV/.U^OFmC@Ze2n?)
7UUeuYld"Zo4\Fb[u+=(5?<p"9i=rcahfS/S(0*1!#?^'B`g=N`7_1hCNH04GuOf\
CQGAOXY5!N[4+?CR[O=g`f)XcHhWg^;t7k0mf\0[1GXOt!dru^0oPOCbSbbtCZeBh
N-!uh=Q-.%S9'&<O[j"pU!Hqn"$3&47ji(:2Ffu4ZPAHH$U'$rCTkF1gHTI#R:Hpj
[l0.WEO*r.j,p*_30W1oPUJO24tAjGhRjgVH6-&dgUq$mU6ZNW^ac@;->I3(?u!X5
G'iS\LR8V&F(:^b%HI0B#$($?X-[g$VLn]@$g6<er;,`__./KOE;P=4WiN9P7hl.;
oV/0BT^ul=FMINZF7`tM>L?!IE9u5^ZLu3.aIO(ha(+uCUu+.7q")fr)s>Ju*.RnV
`qbii8ugi%`dslI;$F0U2Lr*%>P%p=.SlZe#F#>5JS+"ocDSq7ZeCJbd>uugja_BE
FrVoV*`W2E]=tAiP)CAhFkK<fP]B#LTH'm3#BW/3!gBZ]K_AmjR&i_)#F#<bc%2VP
;$F0u4^?-J>gWYTr#05Uja_A:3RA`cd.pZ<YrOe:X\]KU#F#>Xj$;#_:]YD0qP3:Q
(HoRn(rY:I0>IE?GVmG\Eu9+=AoQ)8pYUI=fTY8#LB=tq=/m8Gf[KEJHgdADc8heG
Pt3@7U[.*gnrnJbCTY!F0'=!!<GfiJ*Sir"9W`H0<F\4PCU]$5bCP]?8!SkKp/SM@
X2THe:>7h@I^PbObMblQ`pN!hM/.17qlK:4["ZiUeY^B+^^YTM>W_(F@6s=O:j_E"
LY?I>R7>?QFk9pRjSdkTce4k5hH?F'^A-].OER*a)GjED/@ji)eh&0"T76X9Wo`@p
X<[%TgMOE&GHS$+`sXQ50Q345?AJ\(ffu0>K$/K(ZYI^^6%ej)_`6#*rM]:k_n)s;
1TpG!<c2D.Z@;I#\!G3uHAg[Cr=df6HK_]0k>;oE:^q2G%MV(AdQ%(#o?RdeTZm#R
5<h&@kK]Xc,EFr"q^c[D9/!thcTV$X][8TC!XCphr,_1)n.M>$%GkfsSa8T@r6t@*
#DJCH^N-A0CtLEFYiRVl'YgF?-WF&a=mJ8Pk'S((=t^6G5W/C8j^I-(etEtI4.iK7
m*P06\BN,:5=IE5g#Sh.fHNdR'BN(#5ojPRj\7JK'R%>"-a^Nk;*t0V`Z&haK6,p+
8M%RIde8>-:<8tq,IX3Hc90*-F-3I(f_3oX4U60J])pW,(=h6i>5)1-kL7$.J0q6l
[JEb^@?V+e82F3d7Mql/2;pg,a[6692&SmV>A1DI[HG=n'2<"U]'1OB#1H=/XaTN;
\,7KHN<7b9^A?"?\)2YCHhZsZ*L:QOhgTn[8<'AlT7#)44S-d[pKVdaA_m0RpAXsX
Q`0l[pQmujF2\kq[*Ll+N._;!%liJI42VI_fPeP'f']ie/p<O`B!H-T]s`(\Ee@gj
Nui-sh/lRWgMF3!o'Y8AYPmjthaBhWi.2-e)/#Je^@8uIG1gGn[GAE:.l"[7jd0?@
[bG[Mp"=#RN?lg\55;prZd(TEG51$O94$4WJ%]-*\`KnSA(1u04BR./giLeYYJ'Y`
TH7c+O#c>>49,6MgKA0[eLnW7ne*m;&@m&U`>>A0H0:`"pp\-N4-\7^JHm7#M_2B)
mFntK?"TL9m)gi^/3/f0pYC%[[e_OhmuBKtBGXcY!D@mkou7qhPWnWtBXQAkZWh@]
[818lpeF"ug.E^[XAu59Hmde`,=Y5\EV1iK2d,Yg:UDXoKGa+Krql/&QWR]'qtAc_
>B^psN2'**fd%E0`(:jh=_!rt?#n%517i_D2W&n'W='e<m]cK)Z1m:>5:2C&bSLdR
pg?249Jb@_5Q4d]PHj#_]dp`'A&aJ4)fE0ZN+^/.Ig<9('m06N?c;UJNu7V\D75kO
S;MNZYto^[-gdZM8acrLZg*\'BB0))nU=`Eo)JU]T_t%CU7O>@XaX5pW:EdHiOJ?Q
X>sGF@Hf]qo4=uE6Ns^e,UMcL0%CTa^8VBSL_!S0"q3NT:&_C,"5)L\s4si`asutE
m1'C<YhQ-U-OZko:8*7rro/\TI^$_F&!qYE(@T$<^4<V?rVG34<a*TH6MX18K:VtN
?[VBt4lh\ljIWp_hYQm/,J]K>UQ.B-ZMs^dYN:E9RVT(2c2i\`kb*R(%!SARm-Oth
&t^oZJS:B7qWK/2/bu7B[$>Yp!>\32n3J#<LHG7s]qd:MBY*H*'9+m-)S546X!A1%
L&i*@89]$_rU.;dI($jEPM8u./S-ltG[m0*DRnjE8aG,"`.\t185-JlrqgUq@))aC
\Hl/"(Rjo6I0$BaXKdL+mUr/?-GU'58m;<ZeD3-5&n",a8US;Kk*pG"ouo5<PQ_.S
$)!6kB5rM%LoXlC]V0dWn^G8b@r:\JpQdtZn-D5,O6da=&$)nJ3^k<S&,;AH[K1R4
`@C/FJ,U>TG_Hl5&Dj^r4DsMVFk0]Y/oHWpp[F;mWUmC8*c&7<AfJ9nbV=RO?>tq*
,j_bQ%[2'HnOb#(s1bB"isr\fKb*ss(jc&CVkjgs\&B+efN2C)-1r9%qlG+>opN!n
\at\SQff1!nu(!i*2ln&W]X7+W:Fmoq/0#SW:DW8C8b[fi_YOrYEkjTD"RiK5_k)L
o(es?*XW#%1X7sISqf2+ltn$X^b_"tkjmMu&-I)&T6t\,;?B&XgLm.,,S&NoW+XGJ
EmFtJ">D)35T']d7'#V%J,8E-npL;uVjHRND7,Ya%iI,jm_AS[)u5KmUV1)$aE%>2
m>#"sq;n8S!"/p#Te=YTqlJTA[F\`.ZH4F,5XPO%K]d>ef)ToaST;k%OqqHA^"8@[
rqbr$5A8CdH-X1tf3^bP7\GG#$cmi/J4U#@3WKp^_bAp;AgiT+=`("]!RNAcG[eL>
`<"CRdJB-G)q&B<cNAn%J[F0Iq>mHl:Hc+=q*']U+*kjaVXR[rGb04H)rBHmQZlKB
d)&^og?6S'r"ed]L)0XGO$>2a.[C?:<h9pQnh8]]6\c/:El7e3.@57o^].I*86.nE
oN<6l8",V<(;B@;eCYb><^3TH*"QEp0e*\m$tO]ep8^<_@ZdPYYk/rM20l-`[B\h.
iO,jg:]k1`IJ;Q\57_SY.d7*pER61EMFno9HpV6AbJu.I<gYut6ZX)7;#oo>Z=lb[
>]WX8_b?2.!!0I_G2#S/r'rSPR&ja,$t418VTYn#fB3/_oRMIQr\O\TL&iH;_ZCc5
<-WE<EQ879GgM&a-j26B<#IBL7MrIHd\+:2,="9C69sELHgDnqHhHYM;))nlgp;2>
ZVl<4AiuZZ?il<;AYC8:@nbXjM.m[>B(8$bXXjZQf%kQ-mAhJHi@u+M?b*hkMOt+^
Ts\F4KF.$"Ff0_^\FG\oD"DPSj/)mADu-#PksnNhH"XP.Ns"9`jFtT23]?/hB-&f!
j`smu`/.C!Ion+mrg:KJ_VCS6(58E_G9j41H29'&msY/WrM;+D.5a!gb3_]aLZ;pF
b/<[Zi2\s[s8K&]*6/GPLZ?ECV,o-L/*1$"VCP_EHSu:SHP:g2s%?H0K`N`E!FA]"
3MkeZp!m-1!*D'\!%b=5oQd4",>B.H!USp7?S6U+[ZcMq[Bq(c?i^e*;aTh."XkWn
n(t`(I<tuGg+V_'#-e*%s.4T*$&ZcfQ[QAW,hX85RNqmV#=!_R9d(E/1mf?"P2V[-
?7@5BjFM#&HX]-,_$#$l^.MZ0d+/8YTr>cPid4^1cT_5B.HC-VDthdro,FeR&^'',
<r>'f-k=#o>i?2?cqrNma>:9XO%hgpg"CN">poBZ-_B>gk#iTEp=s^baX7L)l,tK*
AY1guG>DpuqDdHkB`DJW:O<pGScHl=b=bqo%:S3a*q%MBOf-Orn=FYM+kju/;Iad@
gjW4J353.kk+qN%`a*/hlWH![kEe(Kpc/7Sj^I_h!^'*8AY-G4j^GeG!T$;d]?3LN
;BDfJ/WX75+1kcDm2<c<2#scJ+-'R2-jj@=cZrO?KDgH#H#m*]3ta_le>SOH!L+X1
Q99+F;#ndm9HJTZLC(1FEo]atao\epaNlg&HmJcZKVTufC'neNW<,C.Ie[?Nql-Kb
.d`,rY\:Odcic=:AK6=%*l)6R$>9\"q`V%Ac/)kW3oRB+5l=8.]enA#N:n0I!n]'<
B769MXQd3BpYApAp\t5!#Z<'S^N+QdqQ0IW$>_quflIS@NK623)f7S3VHKucCWS5W
B)eg-\@f0%<=+3#b1"rir#>#FSm?NmA^[c@)r<ZHY'Ge;4HE,K#-_8'aO=dIGY_Tp
+iZ'_8r_)HEr/_qTuoaBN69&H(.ftda3B<XZ;'FhH#c4tCO,hmqUjm:lLlt9J.tM&
0.6G_!7lcP5$C)MU+iXd/1$<=J3EbmUZJaFCC^EflDl;>@if#g!Ebj7;6L?[\A0I.
Vb*6g!s1WA^c>(,Z%j"nl1["9#13X;&!R7_LkE\sCd.4e/0@\cnesUI:7bBJhHh?@
*5[)VB=.9iM_CCZd0UV%5Mjo]P>=@Sn,^%L4Fm)eaPqPI>9A@mEN)Uos'tLI^uZu1
DEf8RlQ`o,JeRM0*h5K7#u5G`Jd6N'GIQKG>_<1d/dZD=\GnN!mCuC^%C:Co]m"XC
p@S+HSXH)#;gl:?ZrG@.;mb^'q-`ZtbsiM9Y81r9<i,<9O<KQB)[8hHDU>%B\h"e;
&MC&2<7A:\bSldnYoF]`WCMsgWThD%,c+eG?M+l^8nl;gAG=(6JNjR9iICfl>Aj!*
hg^+lj("AR7k0e!)OXTX^"&h-CYJ`$XlX'fl4?KZNmrj6LX=AsLOU1m/GH8:IHYeT
+o]a=C&3no[Q=B;0qm#ne,].,YJ4+9P%69`ZV%:%^:M$;!Xn=p@uN-s/n=h<LEBJB
R$ki#$BF.;EZh?['DB(Jam>k0X;Un8iJ2o+bS]@g(sG\-9GT2FidKT#1A3TbBGn;b
++-oB,7KC^J,oa/^)8WA7lT;<pYL6g7>h#IcP5>WA-cd@0f+]"=B3@Wm_]Q"XO"<s
(_LTqm$1XYWTde^-SW+(em&*7+[[H3Z3(=AoN8O@GBf2@@GMd,fOhc'V!,Sr&(E_H
7,(6]_B:u#_83uC5-Sj;23'm%!AT@>Kj^ha%`XeG(RW#5"D3&)iGJe+<*_f\Ym2.\
@^c6rP>Bb>N96O@*cE=7\9t\lK/-L8&#,$\ENE"d#6KfH`&<-r]u`E`o[)8[Mj)XS
WbL5?+,X3&a;2,=3)8`#Rr9o%I7\-SWY^V=TjB]J`uJUn=khjAr/ir;BAb89WI]s+
'[+Pjn:Gal0F7^%B\-k_$ILC&O&RT!2);3:qkC)ir<QZuUMFcNdZ>^H+n_OWLJT'n
rmmi.m/"uZC&3p[[Cu6JnC"5.W)74>)_ArsIe]f[4Eth3\q!%t1`Cp6!.;#gO;!Qf
@IIIISiucAN@p?'*glah4s3od\c]9m+LG0N&7?mp3"S(i6\BT=#81a:>sV0\p$8MD
(J?o!rR]K57lY+50dCB%EOI/WN_;A`c,DkFUk)B"e.&a.dn`3AmU_(Q/%gMNW8in"
c=?l)#R(&ZlO$!S=IP.-n:OR<4&uK0`sj_r%!Gk]_IA!>p1Amj@[T+[&S>E*,<Ok;
'C%+l#R=sP6"4dk/dMpG6?+,b&6OV+ITjs!,J4UIOF5u:I#Mm._B&I3lr9cdY-,PJ
A/jLs"#70kO]9%uYQ6rL_?4S\;rii_lS^8QG]<riM_Nd>^"$.fWBhm?9UI-kEp]W"
gGWiX<e%^_j2W6k]O]bI="he'@h1TJ_S?W%j#5Y.UOsc[_dE_0hs&n)YD.TMp4)-&
[G#d/I$3QCUT\'Jf]j'`Jr%=0q]@ipkbIg#U/X.QPo9.lKK[3%j/c#K`+>J*+OFpb
;BM5)?\`J'lGGsE:OW#iW>,'@BijT;jR9oIl9c3:m-)MaPf,V69GBr'!MX*\CfVn,
P[aG6#Z7u^^0K=M@"oB%N5b&9qasplmD[,Zbue!RTCa0\P?;.LR6!=_gC.^mp`r(c
E`cg0(I)NQr8Lf9Ad5,oYK\nVJAZ[[aOX9c4f)[R*j>>[1BrYfV6RHk2BE(/jM7_H
22XJ]%RL*Ei)D3b[>$?;Ri/?DhHXHEZ[HV/V:mg3&[5=S.gR8)i/P/H,?l!mfl"Fh
b%B+9]oj"H1em=Z`LmJ8a3c5@IedR2c\ql8%&2C5E2ESs7a#4_.tt[MYNM@^rj87X
0TM1u=^$dgojMD<eCl!@+-spR<\0/-U-:+tV"?J9@;0OM^%iINLm"SZ!fDNP1?t.L
Jdm;;e;f&-Cc?+Y./38P+4hRE9FN)IDVK$;F[BE*bQ&H4PZ`#SZh@-p%i"eOq*>:s
PLUCc[FJ<!ZHoMCW'Xa[**)*2>C_o?r.9.[p;$[7h'A:k?HOu?(]"bqEX5J`Q:'i-
GLVEJ?r>)f$#D2,F[0%Yl4+@\X4T63A8/Ll4aOK!fk2[*Y(PhWh0%=0fl-8r9!=H?
mnRIISLj__@\h)e$3DSEOP5TYam?PO6Y]A.W1>J*fD<R6_Fj`;YIYCBC/4J%#K*`F
$*c^3(%Pf)V&[D4aj`?R!U@Sfj@ju(*DXSI877>fl0r=8l4._4XF=F\a:Uj9$k>;N
6`TZfJ$(ltUm%%=eWjN/,["U;ABD%p3cq<aA`$5k=LgVDqDd/XS.IaY?F!PdadKS4
X:IBI>3<b"RZfn[:<kY=Z8X]='r[j[lqaY^W==GUNboma(,7TN:`n7@$L5O_0dD7O
*OB"kTVB`>GZd$N5QjtQJGj2>?oKejb-?f]12.pt"?HU8d/>@!Ce$=Ol73a`JQ8<u
6P9DD5QpY3!;k5maHLYgLE'G),!Z97LHt'PPQ\F;ZHQk)Tc7)\/'1*i!?sc3;F#d2
BaPu\O9Oa5!m&T;#S;Pl,7qF.-%X<`F/cinTc7,$-"q^co?TYY^&@ZZDU>%BXY7oU
-'4liS=H_HelZFAP%DKo_XG59c7QBH12abp`[_q0))#B?pQ.`PEW,e/GB,lc1U:DW
7%ioY@"6mR,"jJ+-d.YK0X436oqXc&$P-Tf-j$+>;%hLkD+LM'*P-feasYC3Y_r;"
/$ComkL<3[_#u>AWgojLn,WPFNMDJPN(U?B3L=#p=Zp'p8$"iPpuCf!Hgc)uc8fNW
d&&tDEpUC'Y,`gki4sn<bD-B;JTaA1rFn>bX)qK+=cV!eV;"G<2q3VZOJ..O,7qF.
-%YIEes'#*cj_NLMp-NrqWXpGRr?#\0EL'GLLX6=H063W`u]T;n])`d$\?:m@@3;`
Z$kl5QaF7QXgF64:\+)"0=u,X\tr:.OD@tV?!r3egplC)RnB9rKEu*/!VWEoQV_hd
lXW"R+'-u_ih<:]j(RqR#lKBAk^Ja!Q7]-;J^=k-+E9TpN<%9&r8<2<\e*L%0"A^a
[*qe<ZHFkArVH39o^BNkDC)]gST^IVF3d#8cBAis!"ilQ!VWFNiKoh^P[d`>nQ.`L
&$mPmQA,ZEK0\pT<(;c/Ld6WD1d[71)G\Sbo^g?iYFg7:fmU&1^&1c$/`j1JmQ/,*
.]`@+Q<VYlE5N,gN+7o3<hJ@FlDq+7fam@$^\i+*9$@Z_o>_kqS=b)hR5LOn0"S!S
kbk&%\sK`Lr?RS#ig3nj8M=^jCAbo##CG.)l&Rg`#_2'3LO**Lld%Z]4TE8+0DOqC
gWn,!_[H_5>^PkG^3B&&I\rNFdW@+Pj:Zm%ZBRt^+9?bLfhsL#7/\*Hbb=ha^A-^e
`Z&hI%[Ql@98#/tn]MYK>Z'VUg2!l\YN.f#oilk;eK_j(9bQmapIUb24mKW?Q<SZ<
Rd=[XF]QK]WiN;n5Q(#'QY"HKAmbKSB:KQ0b*U#jA9cU$7k"q+/@()(EQ/m0@;?1/
)E#[@Zd(U<c3[L]m'kl$=r+cS<#82[=!Guu"OcX4>>`.1aYOAd-M:s"LWM-,qN1P-
\Rj,Hb6Wdh8(1lr=[nWe.mP5!""QpTkWtNuH8/+Ss7kUbJ*sl1qH7Eu772S:U)^)$
E_7$ULE1P7^F,Ut_I%TMPtH33#,Dsto^(70ho"pALEG)l+K,88c[S%_&;]f9P>CTo
Sp4^obr+,J[F\_h_bW5IFFO&IQhRdJf5J"?2LbDVGLq1p1O$k[GPDIlSC#%GiepDq
pYL78NI/MK-[;'H9MB7!mC0RgdIk?a0@Y6m4S+O3p(Zs6ci=&2!(fRE<82>V!0/k\
3*qn$7q#$GPZ$/L%!DR9Zd5AE^]4;FqTUnL>`iCkVA/G(;[P<`7cm!;='/l7Q'W>e
nFOsj^CDN>KZgZ4bqguYEk'qHcTQa%2:mf0M8>,KpYXk(3pEGt^Dqp07K2;)0DlM_
9]7Y=pgX9pcTcbZ9!*(C38adb?`l""J:EA?$PC2S-@U((NBeD&/Cg(a+*MK_e;)P/
?!@J\ZAq36I[$9YlOm"(I%_K]WT&hu,lOsZief7\+IM,@'-fpA/l%.33NW(.^qtqj
"FZ"K"0hk5hJKaXe5,dkH4V1'`2b\@G`SJ!aOU$P@C5qK>%f&i_Y8Q[pOE1OhgX%]
QX4uP-+\?rjd0?H?C'j@48_BJ;bf?LVD!9lbGH"CP+*J9gsO=EcmYN=%Q[/("*.\h
Pu?6WjcGmqh9m0NN%q%fQliJ3mj-[=@CEuV)sAj=pYUJ(8R?i<eOj6>0QcMT/VhHL
)VelLY/Z%*XSht^Z]Ft)ITjtuU_Ybu-Gtm.qFKL>2VDVPl_9O;LBt7(J[G:&(0<<d
ff*,qjn`QR_lh7BqXC\,)X>5CD1b%*73H\:8ckJf=gt2;Tc7+58r.Uq-%N9JhX@l(
?679r5QCY&%1\PYEYo[GB/+tNs8MmQ%$n&b6i8[Z*)i2lMA9HGNu;%NZc*GJOE!^Z
\))F(hd]5rZ,72dRt7u.LJpu3[34,I47B9@Ysc$*>4G-+LsJ6YS<>VN.,+%PL_1lk
_%Q30.;UPX#$/M<qJ-cU97>bXhgG#aIWeX"pI^f]Fr'=OAf!8%a9ONCE/'Rubb!#:
p;S%iBR5FSG*j"?AV3,5]^nnk_[JV=?qlAq3F^>9K+pmo-q]R[7%f5>TIo1ofA6ci
>E7hAAa719D27uWYAY?E_ldj/51r@IF?`CBRU'(*Uh$/<=Lh%[!@!RN[)`n:M:_n5
=0KJ1>S&s?Eah6`dKR0TEcTI+^/#rWX00$K6sreSq.'qiICO:khuE[WrT/8C?S8I*
*8G$A0$8trYe08-Ml+l-J]0fVeC2K'nut9])fE//*kSp[\6$NU"<@;nXc6`.>gAnj
oS[9]%;p*uq51#(-a8sU7f$59%#;O<Rr?$OhC&7N<L9McoHOEO,@LO%C$3\;_BP(r
*)#s9`I07O<m?.I_GMCQ+/0e&&V2JU&@rr0J^&dG1K9+U%BNOZ@*f0PG<mpfKG=5k
p/I'2.8+&'ZNlgR!t5,M4aQ=`=:dos#pW5cLRH:4T7!pql&6;.F3Zd9dt&+)\21Dq
U/`dr`BIYYnUUodd%ipa;8u'2/=%S,NG"l32C]c6hnnjO_[hh+m%tcjPq^*2?c_U#
Zd72'#NW/SVOM>K`?/75i)U;<Ku'hCAt)Nd[6!4Q).K"SWAYG$bBkG[.Ko6*Jfe9F
,LC6eQKslqqc4hR"IAngY[(*J-@\r/U;SE'cl*$RpS66>Xc[+*Et-s@8lZSVIUOqP
gqa4;X<2b$Sp@1T3HCqP+*5X\p=e8[kHJC4eB\CO'Y-6jK>l8GO=Cf&e-4n<1Pb+#
GR;QBNH?B%@M^Dr7L#cYAt"<ZYagXD1##h`X`u*n8qs#LF%0PG*3,/P[:BUKX&';m
lSXGDddVm?WFAp=pI^fi]^`u_HZ%d&80:(H<)]dD,s2unA6"7d2$A*)[FWd;`0V[c
kS9CY4obHO-/0!R6q7A`N<&qgnY9l<"I^p_Er@cd@FqqTIJD-S-L/LOm=RUU6m-S9
9$Nf!3Oc(hTc7+5MEkT[s.U)LO:gP:AB5<>W.]L;WrbXQ3#W$1iAY`65d`(X"Esb:
f8m5Qo$ak`)G;Xl_\7B'&I65db>`Ha%$']UdC#$eXgd.JMJkF5Sd.'JR,*D4Slhcj
lc3s@(msR,E@u4ldaA,Fs+)mK(g"<Aem#PR+N7A/bik@63+`Fd!>R\Tgk0Q!]^WdA
?HeRAee3_9P$C$&&\]5sl`Rk&=ol'R0e7,:gi_4S=r6Oh2-1*n7ilqDj2bB2(+%Z:
CKSJH2))mcP>*t*!sT01)<(pn8p,t'jUDf8&H^O,>Eh:W%>7!Qj]JZ=_d7iR:OW#!
0W>S^&-$>Q]PA;d6MI6#YjEY1PfalTJX%]C'K4#ZNi1Q>M_4Ql)9g0ROMSc;PEc;u
/MS1PnqZ7DY^Fq+lpML]UrVEO8/=92a7@/"+cJB`3`Ag;[0LE_C`s'+r5Tk*liL&h
9?&*XG_`r9[hORSO?UOa]^j4VY6\0c6%mFXA`^-HQK[=q(o.U]B?0;Q&or@1X+eUe
p"*PPieG#h*mSptSoG!%NT4l[58>8#YSN1ci?VJ2pJRA%/J)%*%+oF*fk)]ibT:70
(uu[u_k'jia0cn)-jPdk5o^_U_HFSiJA>Opr%M&dL7GIf)>fl]O!!'`LjGo/,h8N9
6m,2,XNdW1-h@\+5dTQSW@t#1r(Ep:LYbrOLB%9cMWl5p\f^keMCj\5&HP<c/@t,S
g!)iq2k='UFg@(UahCh(1S[^j@P*\YW)9>^=fh9W3HrsZ@<>tC6N,ut(+1BSaipTF
jePY3G&_O<X:q@*"_ln'o]X]jl`\(SpHh3Y]W]lgBqS-d]Nhp`h5ZH8&5K<$C0>-A
<W2$,<@=TG+ABHZ^ds9Q'8'C5PGe\06r(TmAceJ2(oY(Y7][3^;UL369odV@En#d.
hS$Q#OD2+FWE;Ci+9G8(+KbXM8]>>JIj<<V3EFUq;'4B?*2sI\IT+dO+@?fnYR#pM
7nI++b,=W*$f/Ue"c1C<3a"N0AA>#U_[Xl5L?T<O,!Z:r7\F&`e%.'^+VD%58*[u%
Bo&i;&SPYW6MI6#Y\i/4RSi_(%BLFY7%.S@abd8L-\d`<Tna]CXDF7V&Kh-CTPand
V*D)oJfPIYlZ/dbm#ZtCC(c(U7Nce;8cmbeNM.4Y&)G$i;9$G)#<Or/`dRO1=&/J9
3nY22p>1/bAn8k;M#\,1!d,a7%fL+tQ0Y*!=dC<*@0\YX<g<rt0`n'G;%hM>D@Fc<
HKYRaN&!._,!Z9e5W^+(rj3]A<4RsP@qCT9Jd;ng,#Ac#d/>@!CcSjan6P5^eq"C<
b!^ac&-54MrFnG6!p,d[3O0DgJ-`LlJ^F?D$#Jp<RE:sd2m>tVP(b(]7">Q=J,oJq
'L5D:$d(1-OI67a+9K)C+ETh?!h8N<;L@Ll2mD"/^_lI!!01Hupu74^9(\&ucBrp#
E,:T*9rl;Tbs)$kAb.!%Cm^Em"f!blDQk2H":lIk1jo(;LSL3sN*Y7XD#l<)r,Oq%
b+@^">^-/>f=Nok=<lJ'8<u0;m>CuAe+T&4]]>;e*"Cb+Ma4=c+j0WAP>AdY^AH2-
Zck1B]^`ul=nEecr6`Vhp!J++8_C4R5CH"K3IfoE(dL)shT[n+9Mr;F>mT9^a<QbE
I?H!$D`Sqjd/>@!Cr\K663'>2YenocP]m6q*]Mkn6atQC9=^gY5!&B%SorUeC70CC
NAbgdhgW2lI.PVU\Ptl'hKis]j,H"/rV"uAKCnTf>KJA9kk<bLn+ubFlX#&9AbXSB
+1WO^L:G2<>>2r*E5Dp-Nq'I%53qXLo1o&J]C3<qs85e1p;$tUm+,<PSPiV=^Om)*
J!pmV;i^[8A"'f=[4XlHb:^E.%]JBgq8XS,gtd>G]l)+Uk=gQf^%^B)Zck1_%`0j0
kb<C#r':Q.jIUYZ)7T=nCV.nVqb6%03Tc]H^jlIRLa.r,k9O>hFH/EI./3#-YNeu?
P>4/Q@\35Y/-LS!UG>/(7g("=jPS)>7n3\s7Gr[qqk'3P?8"efeJ^;9GaW^I@uW@3
^\R#]2*DfXf!]tZAXAZU?UgF][*qcSn6QgBQ]BX(F3QT-s829"qZRd@d*"q0Q]H`M
YSUP`J`\*Y<rIa9C,hH3NX2jRbsr_G*:k>oZte!'?22G^J,%Pp>KtJYs85`Z='T`6
0BC[`qWk>I?i4NcW)9S<c9M@,\@:aF)9c*og:r,e5OQ&AC:N#9]<*2\YqEsf)9hcS
Y.CW'H0C&Lk^JaiKl*giJ^=k-+E9U+)M('FfYc#ohg@"Q<`"n,:HuObD78+)ns:4m
hn=A\02%oMYtlRJCTY"1.VW$`'ud`JVOLP!+*Q:FOWSJ(PdW-\;A/lK-_D*+j[82S
_#?/418c,`+igs)d7R]#3eE$Zc,L!,n%.g;ofMQJdh6([,-W`6oTDH#PZ%q+%idQ*
e(Jlq>mpRoFQ%/QrT8J!ki$*][NI+C3YR(kr@"!D$_hbC+:rpXs.?*4QX^0&]P-Gq
B@^Y3qsV:Lh)31"h2af"\8;'L-CDU9YepqS@30jh;-bf^n\uN[CTkE0HFNe>]/qPo
Id3o1U?0/;9=_kOiqr/UY96Ua_=#2O5BK-ir3I>PN%m0akg?05IPRqjm^_MP.#A<b
][6&Uj,U^((sAf7AB*2/aV:%HaXh<DQ8b@i!;k5maII:pLE+dA74;I:rql.G=\Vl#
a=FC"P*:IWJoL4+nA,@cCTkG6k+6p;IJ;8n?b%V`SC4ORqW^hsCdE;.fFhX:^T,bo
"Sg_=8?J'j8ZGjG`(%S+F<Ot"M=I9p*i`Fak*]kR-p2E/%tW++-ja_Q[@sl`%c+qC
B#^1J5sRnNS]jhi=]V?:%2FN44T+]dh8k^'<B82-YEI'B:H[$uSRMPs/GUm5i/BJ;
E!TOj9g%sa]"]R5k)([l:kKECn%>tgkF?Uf=31E/@uaD1\]H1f7/h@n6t!9L(BuC]
HgWo'nA5QK:jbsPE5b-O/``LQrcsFi8h"To]"fA_8p,t'i_;$;@"4UUYu6VXOCK3:
8CE45(B^_DP/iP!0gZ0jlnfjOFk9p^c91^B/d@BnI.L'Vm^_L]/2D$:_"_<mbrY0l
Wd@".Vk/3LI3kqY<8YtYf3AK6$S>\m"Es:m_/A"E[rj*k%GE"c;S!FJ-t!]TAqM>'
:mNK4SV9>uI^CmYZ<?Kk#fscE/e9E(T)M,#$%Yf0h,N-g(jq-GMbt^)]%a>k2o"dl
lZsG*ojUnBbKQc:'ha6XfLBe4phH7,FJ9m,0dNUp`QOo*:sp!9,EFrbj7MTba.j,`
1,H"\U51D$?B^[Li<ArR88%>/H=K6c5'.PAlqd3rDosdVE_N5D8\,K/@QCP-5>jXr
jh/9Qp$sljWm?%[\S'9`9g8C6RP+/i4'>GAAH4^X(#@&@X2ZUF!uhF=qZbeqYSXb#
Q-t@A(p)ui]C3JQ;>ApT#__V93<Ldfdf"e`n.Ch5P3-&1&[5E]%mKd(a^3JqVO5=:
7I<"c?j!fkLll:#_gUjQ[h<=$LCP?i56(QP."9Uhpu@G(em!(+Jle:DEf&Og]C"As
LE*%`g@c-pJ['k7,N%gj^V4t`f;';:++F"$@0tN6:Htsm(S_`5Z,[p73!ULLTVc?.
PT"\!p#E*V^03*Q(6=J[>[I#_!;k5maI%"lLE+dA74DMu]WnRA3cX]/(K]qthgYI)
>3o%RS]'mZ!tRLjZ,fHDgKrkLa4ETnMnp_f"3C?(QX>2=bJIA!N*5(J=3V.)oI.-R
@22\FA`6Ou&@rpKO&oIq(#?#kS1gKr#D(8#-ja_Q[%443)S1K"PplgC4T])k620,]
n\l<Ucc.Gfjh"X747BiRWmZM4`BG7Qa7IS<c[nSeRJkX38WcN[%2<H&R4s5#?RkdC
m'=eemd.:+NagZ_fN2C)`M&70/r@@f%*FFeEH$:84qP0XE_@u#Q:%E"k"7)ih0.OI
bCSb`==QelR0^#]c%k('a*br_NEVRpKjpJ&9ejU$HBtSq"`1e2m^V:Vc\OIVK&T)J
*.RnV"b'#R(q@P8CY[n(EnGfU@.7,o9r5%0%kO"d_q%5\X$g@#*G4Q4QZfjpHE.PB
(<8))$buW19.^8>^Z&?9]$<_eGX'nj1YAdH"U*mn9:(!)#fbIaTE#"\&_2%L7O&9<
Z.oW.Q=SKJrT,S1%4D$^$Gn[s+@_\S+'9)7]/A/A6]]eIF`]ms'&n.`grnAr>%X2=
/UisuKc#BLfO>5J,K?Rk`1]]a+Mdt5+0qa`o-).2C/IS>RMB4HV_PZr!Xj7XQXGlj
Y$tL0ooIanLshM&7Hu6&b)p'/VVDen=QC9F&A",R*[cDDC'jFbDniFM$H\;5kC!RZ
&@rtF0fg?-Lrr^XF9=%[(Z4<Z!LUu!gPHTP:I"eWpOS4lUo:"C>3s9KD`g0Y<L2o>
rZQ0F?[d9]]g&rDeW/4C):Xhk=!Fm$6R5=AoIN,09&(_`;G);tPuh!K`;!8t3:uDS
"PB@/6e7K353/)#/Wt3!ns.`kWXis.=-iW]N^.iWV$pNaS3r;pHi!!)8*SaT3d9J0
GN9RT.7IWa"<GdL*AhG+4LcIsI(5N.9p&d3>q"HGZn,\].147fc9rds5=u"3RI-q`
X[>%OOr<dYXq7gY;K'5<`i*4L03&b=Y[PEn5I#b&QWn>f^XZ@hq)@/T,Ou@bo?]i8
Go2L'UB`V9fiOsk%%'=4jiS0;*(DSSL\3@r;?j$k.IE]iHg:F54M\WEnt"acr\P^;
VB#1Na#%OnU^N<g=KtpOBP!8Mel4lV2B*al^_$cj@7Us9VK/c-)N^CtN]Fa'!Oh@,
>a#FE#&Rr?Wh4+5anu/E*2#N\(&Al%`Nj&'8uIn+]]"Sa[%=R7-jn.ec9rds5=u"3
RI-q`X[>%OOr<dYXq6].2I?*SqRACO3Kquh1X.c(N$p/<d6nYI'uVJlI'P3o^\#rI
]pSNf=@t,k<P=dt0:P`MJUQUA8%e1sol>MQa/JMUT6sNlN?k>0/3p"l3pNZ,nbAh7
&7C!V%lmRKq2f))[7J`"Quth:')N)7&PbCO,kZf?iarU@Ie1fCIYAM;n?O-:QRRh9
`Nh;58Ha56mC1\&>5O@fMmr!tksA?mYJ'X-^&S'*ha_hP9kPYXm3bm#BuERSV>CLK
i1$hJ8Xai`8)WBb033]>3$3%^0ulth/^@:K&LUZnDO-IuBD9\5ml6h]=32a+EKZ_u
2<$Iim'BbEB9M3\q(QeB7Kr+9`J-B&Q&"i"K`M#!I)qLlb_I1eW^SeV:q!8]kegj;
_P,0Jn])`PojO7C/Xpi.,>MepbKD/:#\/\H]6AJGZR;AmEht&V53E3)mRKiVF5C;>
X^:2q<bq[ChqeX[hG6;AI#gGaBT%`n&_L7o?ECMBBi5@\kYXNlqt@-<.>H(j!pi_S
+]QT=+*(&](@@t,RmCFJjDin(fZ$`#SL4?[.shPTmRKiVZR=e!Q7-hWCM@@IH0PZk
2..dIGb$B3G('5Z8Nm)W1B`9Bjd'*j'J1<G-Y?[83O,<[BC+GuhgJ7c::YT+IFhn\
)g0.\[l?%,NX2jRbsr_G*:k>o1i(KV]$L_a=>4p(J(BTBp=O\/D'dDhFJ3O2dA)!l
%NMFfdDaFdYEU*ck8/]rr?qtgIbRJ#2%/6Ul7)o][5A"f_MbbfAH.T@+3JV8`/o_;
rO>]:jes.H7])pC;E&(3_MNi%kdBc$FgD%u/[NYV:6#gAr-?cE#d?P<L\rUAI)n&0
>-sJG'LRScou/VJdfS;2-_+S*-*KnO:la@O@eJ@_(biab1X7s+j75WO+V;4,-%YHb
p/A6)Tc7+Q$lOR$&-3u:;ZtaFk!QA;@m8tp=qC]YcoM:rpS0"<Xcm<CEt7$A10I0a
M?jao,*2j-lq^O[3JB"4`tUdN(.<ZYj;NTrr?qtgY+&)OPmcE`C+fTt&-3t?"S.*D
qbtWl*sf(d7">OSJ]86,XUe!2)j<e[@Y\i/\H@X&+p(/_#ZQW\qpR$Gb'5V_1#i=E
nV@/Wa?0Ntqb\!Yb_nU>!etT#l'@pO&HO(@"L<X[qpXoQU61U8NfB^P\3tiQ&-:r\
pS0"<CfLWEKPk0$M=Z9(&-4!%5mX\Zc%iMPa*bsj[3,N=TQLNnmRKiV>:7TfjrCs`
A[7IM'G2Gh6m)X9fUo#@EXGrGN[]M&/;O9<a>F$mqb\!Y>W8#'.i5dJeQr<s+9Fr]
#il'gp8=-b4qM*RL]A#0!f\?7=s&pC2C=L?`=C_>EX*.+6j/;G&Z?<Cp8:mlQ187H
A&\\jiXl28OEgsqpS0"<R2:.["Us5&dOdV',6C8`#\4/@p8?T+73a+P*#h2)EJXZ-
+9FCZ`&>tQ"K88g$o!km!^r\k&7C!V%oH8cq2ch:5m3!/lOX?XO)bH5FgB5%cCl1Z
-7d2)&HO(@"B%L8rFlT]ViV)DQib@QJd;p=>U'fk+!lK_F`XOqEhOFSm3Q-K,!Z9e
5X#`eInD``!s-u)#S7"\cklhXocXWXA+I]Hm*H1mG6"m77">OSJLV7>Ip+-p)%T1s
Am@SP*YBLrR7ABA5=u!HH',"/^sENAh9n)<,!Z9e5^!]HJ!qB\1f=t/Yn?UFQO"-'
,![AJC]dC$J;Uq[!&JmE5Qj+P!VWGe&2iR:%lpp27">QM%Y<"*-tcpl-d,3G*4g]4
ZB?aQ&Kh-C+9_o#T;DU/$<^2c.=fVnL]A%.2$0KK;%hMd2j`5K(V51J?38+h!^qPE
j9#GVVj([T&7@)G!"g=TN?Jj:+-ODt-BHs$[K`&0MQoK9J-Z^;(*VVLDc+g(2?X)Y
(FdB9BJL#@5Qj+[J^F?D$#CutU,$l"#$*&V?P*;_5Qlm.%1&'je,WMRK:6,B*&Au_
(5W;.J[RfdF?`A!gD472+c/Iu&I@3tjVof&NX-2I1_Htk.EsuC(D.bk6m.NrKGk+A
J^%]j@%E*=Riu/]LnQl<2QK$"9*C&9L(UZh.DnSbd>.c7+9HD25cF-6'%jW(2[`1[
nr80J+GT16nr4E#7g+VJ&Kh-CTJcqOB5>DCTsK^Y$#I'3_pT-JN^/,P[3NW68eM.K
5Qlm.M\)PQD%Z9][ODKD^bu?s-;"Ds5V37<Z.=LB_\)to5QllC&Z?->lIjn\@d%VQ
5Q[Elq64s/THb#@@dOFUZ][_,#S7"\clrUkB3PL$ZY^$N,d:!oQ&-+S,#AXK<33L#
`NVa\#S7"\5QkghJ9nX^]GN]a#`ui6><XSY&a0K'W)u,JbcE'%+9Fr]#daj<lIcpR
cYT)&!"!I??tH'#J-aYV!#99$BJD%M+9Fr]#S;R@&>5Vs%53I]2?G/.fp3.A7g(jS
!@lZ\&2Ph."Gd$i+9F,]J9nXm^ba`B+@$"_'NgbO&Kh._+@*nL$X*s3"Gd$i+9Fs(
2?]skCVu((Z]+qkCprHCdLh%j5_+a",K.eu&cj1A"Gf=$&>5V3&b+#Q.0u$N2?d,.
8d'r8/I51Xeq+[T&cj1A"Gd$iW!rdmg"Pq)k\MJ/!h4'&Y]N:+,7pMWm0GGQP!jg+
&-4!%+p=iW>6I'pD$g=iYYB\6M%Th5:^[>(XL4_?YXF!I&-3t?"DU;SHF>`E(cpCW
OMGI44tI]dkQh<i=?AjnX<\B#!^qPEZj6]tfbOV7Cn$"V$#EOJAYMSC#h4G+'l,C7
0e<nZ!^qPE&:rOHTUr7p08@b1![P#'Q4HVY"?HSb.b9Uk1Fl$"L]A#0!\H`hHF?8X
1Y\cL5Q][S=ICQL+9Jqn5fHn7=q"%,L]A#0!^r\>"K5sK_i(4pN;s9$[cPET&V5s-
J;U`Z`6:gd!?sc3Ld6k0TUp!4nBA<i#`uh["]csB"Gf;p#Z.eWJel6:!?sc3L]A$c
%0>bIg@/S8Ca21HRr.u*F@;cH&>3M"#ViZK7">OS!@#l7"K5s;"?a#-$3DKW9nARd
&cj1Q$Na;/[@kLC7">OS!?sc3C.!Mt[Pkc83njq%^h-e7/0,>D*<O"Sp7!!U@RNMq
HM-R"cd+fPCk;Wao?Zm:FmE)d`s3eR"Gd$i+9Fs(2?ZQYCVu((Z]+qkCprHCdLh&c
+lL%X$ST/sHh#&kbLUOH"W):,5QAAPV->i3?P3A`5QllC&Kh-$&MRJt*DAs+g)U2,
fQNT(b>/8p&:n&'\]+7+e#.$(Dnc&0MIFXS^m@H>#S7"\5Qj+ZJR<p*eVtP/ZCp>b
ku7Wf+5.\8'%f)Y+H'"ug(Am.Z`osJD+CS2bX?se&-3u:"U$=>==YV=XWbMr]-0E@
gMRX6H&4d]&1BIFbLtL;#as3c!^qPE&:p,i0P&69\,Q6iQd$IXem!(+Z=3Nk#\4MJ
'%ea-Kk2G0*IpDS&Rpb+GC]0c73Xu"L]A$#.KZGgXCY"0CImsKNX1`^[\M>SAg3<M
"HmA*3W#6YiNa@iJ-Z\e,1'3jb0@eDp9g`k@HJ"C5Q][_J;d5+Ld:nE'TWfH7(@[s
)3Y=;!?sc3Ld2r2@NB7QW+uhK?J?1q'%hAm*6V%ZEe6Q((7);13>!aA5m2uD&Kh.C
5TjbVQF!c_&.K#p!!4FM%=lKt7">P"Ne!*#,:/rYg,PZtJHuef,!Z9eJ0A;]f$7Ub
m&M;ICHEb+!o)#KA(c](:(Y3S0O1H\@<5=P<eCYh!?sc3Ld5\\`+NL=qjJGibc$@(
OMEad>UE/JLd6(g@"]Bb?iTt(FV,IJ#S7"\5QllC&Z?$;RtX:=Y&pZN1'Yl\![Ouf
(D)Kp"Gd$i+9Fr]#S7"\5QhukJ1I0/6'$#lL&_Nreg/-'&-3t?"Gd$i+9Fr]#S;Q;
#]QV=5VSU*b7PkJD7KpS!$XZ2L]A#0!^qPE&-3t?"Gd$iW!388fP45l(a;3JL]A#0
!^qPE&-3t?"Gd$iBK6,>YUpXl$U=iN!"g=T7">OS!?sc3L]A#0!nADY!a?++*>F6/
?opp3X==f)!i[;MHd>U3N0uL3!U@_&6-Fq<!"nEK"<,gK,d8<??n,0C$G$j:Hqsm$
!"l.=JOUAsD7MBCZOidYC_j<MQO".R:.([O]gr4ZBe?2KI8*!dg9<&;_q.;,#S;RB
,Ja:8?Qu@0o-I2`L'S?AoFVAZO-7;U0=sp@(oh"U\rnTa&Kh-C+9_o#T;DU/MHNcI
.>#gGL]A%.,m'e:;%hMd2NR\b'rk]m?NS4m!^qPEj9#GVVtlFLeUm?K,^:U:7">Qm
LHqeePQ\EYr,Wf-<5Zj15cbe7+9Fs(8d*e=<XD`p"J\*66r5E]&Kh.C73GPo8ckJb
&\"WFTc-sI9$^b!!"g=Tfg1/eBm+#!U*Pt9#S`[2&Kh.GN'O=jPQ\FY>>[`C6T(ru
V!1;NL]A%N-j81pk"FKoB>3HKg(49/O?N`>qG@mXoOXBR*()Tb9NRC2,6C8`#c)tN
qpQ6E:,*.!1I\O9'bMPi\O7Q>5=u!HbN;ZOV*[&@qFeVk7">OSJUATUr\P^;Zs$:t
L'4\JJ-Z^;q@Eq_O-7<0LOX2OKka`#"c*m<!^qPE</CVPdjfo`P@0VfRg=nj,Q^@V
ZNu6L7nI)E/)o+o/6'N%:$J&r&Kh-C+?Kk55L#3>6Bm/o%"TVO+9Fs(P7\)NO-7;%
E[sb\H`2[aO>OY,!"g=T*JFLjdsR"Ao$!F_=W8PM"O]d_<'NtVS%e5ESR\UQQ0CoH
E(#3^&:kN,@"4UHa=1^eH):j*ZQ]H=+I<@el:4ERF4i\@Y>hHT<IY;lP6_^#,*3<<
fUq:nN`HP1du`LQ#S7"\:`fb4qG@mXqXDgJXAB?V[fGO"@\8,GW>dj<UjN.?pYFno
:[T!#?i`4PXL#J[Ie^amrqbr`=0GqI=8UTUHVM]_o?TY5Kbdk5br+*XDN$<iE6g`F
XR"9/LDta@nM=CI?[r%)IJiWU;>I)ZE_8:LKG-i$]ZE>=lqar@UKU8\H.IRJH=>3&
6:\`eo#hO;1X.b?qp0ckj2MsL*;@N!O18bf?.PG1dOS>j3>M;]V.,HFk*U%@).k;i
\g@@%4S+O/rql0?$7i3>BoL5d;iEq`D)nsAIqSe>hYW$?,Cs\;^ALD0eZeV"9R^a[
"gn7%gUe%B7_$PeS'8"Jp=er\5Q>hLh0#&6bD@U<fIaf/ddFX*Nb]RFL(>Bop=Njc
-)tI723sOMf9]fiaXssR@d_2O?Z](+nV!BO`YjE[l&.4/E$'JsJQmBXKc<c'jE6Y\
2K=dAqP^96`YiF!h07biiH1JQH3g`>9b6PHEhY\F5e6_RIei(AGP'9Q]9>uN8Vucm
M_FK6?$&s<r:A8#@-l#dYO$uR*U:B:nk1q8fOJ!TE69=YG^Sqik;r8*hgG$Tk!%UC
djYmLi9QkN^?L+EnOGO[,a1Xb;_DNgG0m!$(l#Z^MC[JJ>AfiGXqdQ&giJPBh7Il2
=]<pQ"]MWj_>7#;^iVse69n^&L.%bKhW,W,s8Mc-?:K';k!pD2KU7hBW5;nkrO(O-
j,N`f_$;&%q.KZgp=jN[j,H!hQ<OWf7m5)0qsM(&#ct`Z4aOJ\#J'j(`ufc\<EJk6
++J["oT0@D@fMY_E>'m/-BnuA-G+A?@kQ"qJF[M7_UYP;",23l\`_QCEVeptp[>cd
:-iD.JFu8(oXtglJp1@GfQ"qPU],_XJ,rM%ARO$^mFt_.'7"3J7L"F=nt(@1q&(U.
?U^&ZG;$"tC+9a:D,"t,'KB&V8uC$u)"JJ'<5Zj#1ARuuSTirTAL'qaO=^G%1@*Yj
Os"=OY.:EJ(BSs^p"+PYC"58H[*hSG\)2Z#;C<%0Br7<<LEs+=s8KXfD7A=XhiIsV
MV.nU8RT/d1@lP6]?D(U"fr%3b-NRbRN;_:Xg1>sqaTeR#9J+40i(r/j(6DiD\iJe
kFR#irOifq\))GSbE`qt>C!ktkt.sh.m4u$lnL0"SVaqd($0c#KbsZodn]4?q05We
;qKS'=$qO+oqNe:%>c6XO[D"-r#q9=)M,hp]PkO[k)pIDj\,UDb:iVah05JuEQ&[k
o#i\i5E(-]ZHFkLWi;ldZAcuM&u+T\&Rnm@'_r1X37,i4,nFI!Bq0D(H!ZdfHeEK+
f3NT+<RgPj>^54]?M<7P.AiJ!B/_KUm'?EPJpWSMg%uK6l/IUS/pJIf5Ztkul7;Oj
j[4L7%6*pbABW:R`uKQkSTje+)r+.Hh%Z+hA\S3Dqu%.#/>;1]I.PV]s8MaW9aC>K
/8(Q"ArUlT/[tL,[b)d]J)Z;4q?J*i;!Tp\/@5+I55@V<-s&ng<J@Ags&bb(gBt1C
"UIqr"`Uj8iLFu7M>H!&kF]M*3K?5m8.XNQ:4H^FdH[d9*qe(11EaZ6Vf;UuUQ:kD
^JKb4!diR.LO%?qZH$&4MF#[8ff%Jj"#%ir,JVuN]?MFDkb6Dq7N64*0`W[]+T1T4
cgH?UI)$XV]UNcHR>:238]Jn(\8mu([F\_kQ=rd6gj8:g)@*=7XDB8SE.XBC[d'f/
55F9'rD,ZVjEK<l-RG0iLVdDFmBmkYr`jmEeR#]Bk^0-*p=jNOX*)ur-VF-_;c!)-
^O,_CI_PX?o;F=t<EEH@XhM[P.a#$QHL'fW%!phn"lBu\R7A==*-7(Q_]S0t#`>M:
K^)'!@%/dKp<"LW_eQAYG@#!gPh'B).n2+kEEd:f<>9AZeQ.UrQWe,QN=P&Xks@[n
&Z+\/$52dN1XD$X&GDcL%T:9'HRQID^\q3N6.s(Mp,%'J#Gf9ScQL\.m`?iK/4fNG
kFP<R<o>A&NP$+Id!.p4%#L2c5)R94Kn]ci7_\YKjP$nS4:`>eaFaKQ,K%Cjl-m\*
4JV=aS7NeIT4!6WU2V6mQ0Lo:=s0uVHa#EUFp2N0'+pm"'4FJg'*G!V$OhD`lcSIq
p_)#m%mO<_N;)u^aG"Dqr^,>X";W7$qT0!o_SBSk&P/s2!$[06iGRJ_q1g#;8Aftb
:HeC#;&IMZ@rU""?(H/mBc7J7EjjY5dr:]Ah1,J'ocA_gE9/dci.;?2oZoSa/.F90
@O"+%%g1>)/@1<3+n'^=RE,'ff?_c'kFCfbL'`!G)3M04)0%A"/,Oo]hVjq("3"^W
U*/:bf3_lV0uAjr,pgQ5<<h7g5Kpc-%tbG2TcEP<Ri`^/#.V\anq<d@<>\X0A(W`/
)$t,S#j*[eW.pQn=E7I`O>W4ZY5e6Gs&W2@%m9?s-lti3Ym1KOe4)^.:WLleJHbSN
B-XX)hgK_0\)2Z3Bte%i,OuLX;-G$q^LX+82X2p73$NA\0D%-R>SErb4N6MQr,q!^
5#`(/HY.,_R43Pg2SIpigI:?jrUeRM:Y=rcO_qV<6B!Q@Nn5@mDS5L/O."X;[b4,_
?n9ci8i9I^D<#?tUhpI_JsJiUngk/EC+nb@GM]8o(1Vbmk?C]2@<U,\CBQO:h?[r(
oG8th-a;Wk4)S#h@KMIlQk@>%:Qu_"%Km4kRc7)$>3UBeqs:Z8oG%R.&I3b-_U)A/
`lp!(l!hlV_Sn5Xf(iEFA=+6c`;m:@+YRY!MIX*\Y.JG[R%:X(DnPUpl?(MXITKj$
V1u7\UAe70A`;6C@h!j9a<?=,I]pK^WqmT1N@uHp[NQm`d(f?6Z)pLjAq?_[<>\X0
@rcBB1D8>0&^4DU:^npfYiMrJR/JgDj(_5!;,Ilb.#d0CFk9o#TZh4_1Cam#SYZ]?
JRpq:C]kONA]t\.BAqiB&#7tu8[U7=?@&T*6%7r$AQ.s"'Zo4l>0S*ibjH\A9X=<C
S;dqe=YSV@47!NTCBgItU(IpZRc(1hYXg_@Wi75.C)jMP]=7LdIO/W`P7XBLP>Fj.
%kE*&()UG<];M6HWf-:s/d"\&PHeTq"Ti4K)M*k],U9P<dU/q?SA<:h!'5`<U4r.c
3NQPm11TGY3]HK2h$*8PEld%mHg_uo_($U4@C4*"Ms*'lphD#:j`6_s[b((/!fN=:
k-t$7>ALZ=H43H8/KAA(j"mdhDM2jj4aZnP0IS^_]7m^[$Oh3JT3.]9]TNOO?M*^D
?^D^A&GhDKmYD-"_S[[b;.&fgE!/jHN@%=#gF.Y6M]\s-jU@I1<<l00D+#!l+#[q;
<(Dn7@V""?4Q8Ntc<rY2>a]"L:9gjd^d@R[2.V[:`g:CJAecpn:m2;+5quO>`>-P'
P/H-[X.P)7?/^Qe\St+C(8JJIZdr;qBp`W@/<"#V>r?c#;N2pPIeRM#psJ1*!Qm2;
Enk<"IJ!OHnpk##\AM]*p3<%-E.pS'fGl<;^D\9"+nQT9&1=\o`!Lm4!c)"E&0?!7
jHr$2/!er4EC')S>S;V,5#B-$/#P)MMJ)->bf7YPpeE5m=g\AJh\VTVl0c(\K:YFN
/IVigj5g:"9Hp]!H]32'F9Pa'^u?BO@.;'U4Q;L=!h"/$agof(WEC0/0PBoC26<=a
P0<.CkU'g]=--HcN,i*KYbf'RAbOu-moe$$=tbHGIN?T>6k@9Sm+FkN#7hjqq'GE\
"nBT+Wl7']PZ+;sQ+DOo-A7H+NnSq)(g;M!7:9shg<*;f*D'WJXnKD2>AVX6Zdcr"
:nGX^[-%1=)fCK.H!BPP0*t\%R&k6adT91n2*t\<kV&/bM83Ss%V?sEY[8,'(?3UF
)sW7tfsj[!YTUr?%0iMCIjtYa@Eb_'Q,>-uJ].W"Pm]Pc]1*)XQ<.RW0P7=No^/S?
'%gZhS,[;FDDW^RfL?Is=o;)*.qc*IZ9%a:H`n>KJBY9raS(-fA^-SEhV3M+Elng\
il3j[s"hAG\D.^+(dbO:GJF4aq"Vm_*:U+"_@e.&"%*Yl%^WN#PD^%7iXonCJW_q/
+(h;N(7EG#4rgn8=:Kh8&M,HeZ,[o$8JURm/gdgQe<'klK!HtHXA-'5iE>@s#Z.*u
+DHZ;#ifsK/Jn)j(^u?bfKV&miG,s+SGpAcZ5*](i8Vpsb:OkIV8)#B``UAfm'("Y
^1@*!LEH4lqMWlj-p)$LD6GJL-4s?ACDJG)E&8(V0O)6NQMWC8MAb8kR"Zfipg11Q
^G+GRbFq4,@4\E^!XmhEqI&Qq3R#Y#SlZb8KX8=-'btknU"0(A[C8VH,(XSF_48IT
eZa&u95^d4e,)W0p>'rM8C=3L8HdVi3^l-HSt][!U2+TOZaqj!@*c&\$l@eg"NuTT
+9eTnE*/QEj:h_0Ib5#2LF\rJ*VE,$K,Imo'@I^P@YBKQ7h<lK`2p$,T`O\:,)=-(
m$WR%__Zb&5Q814M]8OFPt$^a>Fh'bE_-`3rql.S9<o0/W2#C$,BlDG/aT@(DVCqo
Q0O1#GV$SrbNb5r4YhqGaY'n'AAN"IJF]cJY,2ECP$hD!KhO1&):qBT#])O"KfDPB
5`S-fTa+9RclI)Me6fGoC\cY6-gXB3FqV-Ecr2'lE$3DmI=C:C=7eHhM\dbN7UVo#
Yn[N?#ilP*0mF(]F'L:LAgKasnL\.'P0.3fj7b)WF<2EDU&!C.AfNTXmtQ`Ro<r0,
E,:QR"Yn&;3=@CBJElO3OY%P]#D^-5$]b=63;ZI$5F+jXMK4)omI\k'YA%0&%,PKK
S%;YZ9BD4Che6UIY`0ioZhU44<mG*pF`fqdZ&]15$cfnf#qp`Ec,G7l39q;)&;Hfn
U_iE/fk$N#;:.?_T7?jNSg0$b:pr?AcIru6*aX?po`ZE;0VW)&Tp&2/RD7s[Mk]::
rrtrUYj;U-oYGJZSh[9Ma^NL(7UjW:0T9+AY7N6:R^0:W@$,`_8LN%O^JJMj#F$)G
cF*fb<X5-2$U!bnK\Mf"_sdfGU7U#4"W(P&Km.\sJ\I@5jm%XJg@g)Pr#cB+\C7hr
!nL-#Vo1-#3<UbVEp0>!%Pt0LGO8(FoTpCC6pD10#"*djCPg`WC@i=f5IJ='m$"dk
3flGE+KY:Va]KtiKu)5T\(t'iE35,YML*87&,`(f:I"f"I0UdNR8TMs[(%6OE(46/
V\WHLTno@O+)"o?i^b(G9F-%SrK#X`EgYgA\@A(<SB6Z%Y)$lTJ1eK6N%cGoo0]'f
>Ro&?2a>@kbJ#^S$6'iE&$fp(L%)carik7?DZs>s"b4J.+9Vs,82'm;4qM(;0<uIB
HilXKiuD4[LN3AnlItn0Inbr_k4gST+GnJX!C]7C*;.Hdd<Q0fPe7qmC6TBCl@c)s
;+OGCG@tce>""It9/"!>j?Rf7MPa$')(B^AHhUQjYsRg<,JhLm/15dCS1)]9iFRbp
aipZHIB$%uAs`7W4Ci/n'4U>s8\0a*ROBmMat2`>BjKi<`JJ%s$s1PL5,^.`k_,1%
$<lr5d5i$g`eVb\@/i=T:GX5YL'g7m2?[Ac,Ko?i-aU$PaI;BHkV!g<XZ90[K'S*&
3?^59\h@q!<HA=Q&S-TWPOm1m%,e]-5Q"@J&Q7lSCtVph^M]aWK^:]BG_paY98"X<
TWBoYX#dlLC_4AVH_K(f8A'Bbe>r'(/R,-n$e:<$^ik#s.]RusL/jHh+,N795k,)0
/GY.ZnV.>1#m'atH'5%_#Rq"ang2mkC=>rSX-g]R;GW#n!mO%SP[5VdD3fk/1u1t;
X%fY@@]+a,lo/q_qXr=-AFHQ4$ca^Wat/?6q?X;i9crt=k"'bU'A`@Q]:JR1<^C.o
Pq5:GhgP6)1]YuG8@+P+73GPo8ckL6(/eeY68bi*ZY-Y8,ClW+@]2V[#GJ/"iZeYm
S/>hYH-KL*:.0X2BtgB<H0.bk[FV4GoTpPaj(*(@<(5IblGNmZ',qIE+)cs#.hE!:
O-7;e6@'Np1K;97E"uM4,!Z9e5Um&D5>;=De2!^[;hLMV&HO);;ZoG[UEm'(D'8LP
.oaEd2h/gl!^qPEj95SXVg4Ec?hL'So-I2`L'S?AoFVAZO-7;U0=sp@(oh"U\rnTa
&Kh-C+9_o#T;DU/MHNcI.>#gGL]A%.,m'e:;%hMd2NR\b'rk]m?NS4m!^qPEj9#GV
VtlFLeUm?K,^:U:7">QmLHqeePQ\EYr,Wf-<5Zj15cbe7+9Fs(8d*e=<XD`p"J\*6
6r5E]&Kh.C73GPo8ckJb&\"WFTc-sI9$^b!!"g=Tfg1/eBm+#!U*Pt9#S`[2&Kh.G
N'O=jPQ\FY>>[`C6T(ruV!1;NL]A%N-j81pk"FKoB>3HKg(49/O?N`^qGC$Y"C_X-
;tg!?EqeF;DlBJCV"=3(5C5Cigi'abQI3=*55N@pldsGn+$MgX$[qX-P>D&B\)6%,
rUeR4P>3^CVk/4WT6]ReriWm$8hJA(1Wh2][C31R??j<T]^sGJJHm5E=nPj'IF[es
kFV[]gMSMZL+h6sJ^F@0q]_/`P)#2JojTi6"8--jEhQg@*OAM%&ZQo^a&G**+uuWP
W.kI8SpTlchlU*ANt*eLqt8QJIG_berKq)TkpN$DdO=oqDnT-Wp`YD4')@6o3TH&S
r!YC*TR!n#ku`5mQ2QqG:?c,4mBr&F1n7U4nZAX)?$P=^Ib%Y7eTPudAX=_&,)=D>
\`T>R_jko(Bo-9^g"m!flqc@TM0tOOKKQ4MZeH7o(Mf?Hoj[<UFaAuXr?s?FJaN)q
<)ilo%1C9e-5>\bEPrGX\V,<7@YlB<#je15rol.iLY:?m\b"*.YH8,t='pC;-_Gd,
s6R)<2@H76d`j8U[C.Xu<4)['";W-9F3cupYRS"+Ce"ugT4Y^4SPcs0nt]U9Am:s8
XA:IuMtQ&[ag"2)UVMon[Zaom6JY!dXNs*-bYL(C6om[rmBk>gba:<+XgHMK"U)7O
Gnd/:GjsY"-EpU\qUf;='iunAcg?ar!I<k!G?,unO$<Cg$*4/n_eZ4M1l'GbAX+1!
-hUql`D4+6NbkX1e%n&f\MW$$>2;_W%1->UJPZgAQt)0H]Blh]hg"1@o`P/]CT]*O
(s6<sh0.885`C).^%Ks*lD^]T=Mj[s\)0Y`Z&`k7jd+BWR'Y!lMr/pRc2A/;r"-P3
G[!KCs7=Q$h_24L!Zk!3iSJqM4cPLZm'l>ebN_7a-Xu]ZbDk\P@h/P-J,e7V^A-^e
`Z&iTd`9UVhgO[sgMT);kF?ViR:_o0pZg;0$\?"bg1u-*hS&U\P"RFl0=g/,.#n9*
mshoE(\+c3FKre#o2f4?<V/J(;^q(tVk<An>];tnaX!'pj:gG:Mn5F$elc2Vq<"0m
YIEA7*_TF_a[$.PjB#Jq's73>2r('/*dd7Y&LNT0[5*T*fBt<*oMWX3K,#>B[#lFg
Cm_pDJT%AC?tI+gm;9DKA\I&W)uAH@qb:GdZ,[pN^ZhVbQBaIr<:@QumXC$BVU-XY
M_;T>ie\2lijMjdDV/<Ts/1c.^=XNPi.6?gl)+&8HhR*!R5KbN"GDUb+W`LUP[A'o
FZcnHEqTD)gWuX#R)>TA,)\#3J,fIkoAVX&#__J=1KqJP.orG9UgBj'`'6sBh178F
^,r80W>ErWg<he3O'8)G?k!EK'nHo*$aZu1=F^;Bf=fE_/\Uf)"UOS1pYJMKOl'&0
/Z"2<5d9_dZ3?"YIc5tsp1pe<QJR6>`nr"7SA9`$io;(g:-%DM]_4"loTEQpTnV"S
dbA]TXa<70T72(qF43iBH0eO!ph-1D7YrqBjZ):Zj1kEP)i]oiJ?Yba++O3ns58M?
Zu1\0HXQ<Pisn<4KG41u?[P_oM7V[E#q)79Bn3:fYegbHO$EWj2!1E[IXh1TQg;9C
5NTak.JA8jo,eKp"1!bp^_9L+Z2aIF:Gj"$/E@2_6/:$n@h!k+12Fh9R8(R'O`oAc
#7^:C'2SC<A5ZZ=4JSJj>9IG5J,d3SAt!FU0EMTk;1,EY"7\,is1.<a>O)u1+q<3+
.hL*KA_LdhI?_AG7pleZA"PWE2&Ea(Ep95j7UUcP"rgTMI<@-.=Q&e34S":D]9pB_
n\l<55=dGn_1R!-/-d/6J;+;C"h>[ugi4'Ep#Mah+op<T8!a_h)NcE?,5!,al)>L!
)VClmbX\:-:G!LL8)sDBZc:DN]macTqS@m=<d_!<_i,be"Mp#.5(3:+5KFKXAmQ&Z
`!['n%*ocuL;PPVSh\,q/l#g52g"7[%:^[NPuh;>R555#nA,@qHd&G*mC;2:8d9+/
%ceLQJ0;_^I`sb-GXJ+n#@nBS5[]*;jVK44470CRoH(pQ#*QtFD`n'A-_L/C2V:9-
nNa88Y.jbtOp&3m=:cFI#Ek,>na#)I^Qnu.Z>c1r_osZ&+.NqsP>4/1T-&R\E=Hj=
^_8MRW/JcjP"[^+fH8U]r:.i%]C*7Gj9r6sdYGYk7e*UX%7D*6I09%q3Xlua.!gT8
l2CA6?_8j6#rB&HNr]a#0>IE_YJk@Z;E@9T0r&OPYept"[&o<('3LJ2.gShg0S"n`
9K(R7Q@o`U?uUoSqZoH1psJ1*JO\]l]h#h-^%fph0(i[;qS[\pd7?J?c]=MPNX"tF
A#muf/hFoRo#`KU_]L!#R%Zm9R-fen/E_\9Hmp=QnuurZ*/G>!/4##0F:H*j^]+*'
\mP^XSk13P!b5C!(h8MubCsdN15I*T6@pnApgBLFnea)jKLS=75XscDF[HuW=Ng0_
;brAXdGn.:#.)<=G[YS-7XID=j3+7Y&PIhsYmX)5Z[s^1\>&u,<#53NWc2(3%'.]T
2q/4TJ/]K4`,dp?>E)<5Z+p<hj<;e&DneI'*R,'PMD#UEe-678QA6Q3r)&;5An'"n
-Ii;D.[:=`e5<.'IG6)a_lls!7UY7GS?PC!C!Sd!N*<St!fNIMbcmOpEA]bsQP!H8
Gg/,JO>VK/q*:SbGu?;AlG^LCYq,(!9&CZaDk^S9lhcH`Z2OOM7f(MWD5g[uB^f=m
[Mnu"_GXX_aC.jnp3bjYqs:ZdZ,[nirVu?dr\$T`ZctDWr8Ihp,Re5$*'/BW<\,O$
@DiF`3<G[<dZ>61"OA@j=2u4pX=i\F@bEC-)Ihh?qfYhd,I!Q_7/>jq:1-j]q.'qq
rM4H-huE[Wr@n\93a`i/rR55Z/4b&L.i$WIK&:n?Xe]XqLOI+^"!e`o`!Oa+?$)2m
-Xfq9"'^aY1pOgqS9X%MRYU:2NPDgs7drhbQ.gcM'>J!G(j3l>lB*;]HL-!=]5hK:
@Z)fpDD?]:_QR3*8H]f?^_1fA;hlkMYh4^?!_o!l"RLV%+15N/lBNaiia6PXHL[X-
TlR`>dWYpoTjIX%9A[&m!ql8^`O-tB/OlPRT,VWL>Agu_[.c?djgNo]X/*OCYN9gu
rVup`!(fRE<:I%'=b:XkH0:`"N?d+))[L+?"P.28"qDUi0:"isgiJ_p5OcGjl45'G
%#hts0Ymla]]5-IGRt)BT:L&K3I2424)nnd'Dl:E4;fFCm'G#upAJHt1WbmhCO*p4
o+2uh$c`IfIK''*3a_qC%`;8UDR.A2]([!/P6dNf=NiD7<K`1CMZ(*DJd\sb0SgHf
Qsg1ZCD>Z@g-@c-]>ojnACOD8El,QA/$?D!?<&OT[03p9h+A8]Zt]HrM?tg<IV,'d
[XqKc#R;4`'5I<kAK-1iqpTB5Y4G7eY<8d#s(X(6Mq![7Mk/I<(>$(QI^Da/`?'Ep
C]kYj=>5sA@n&/:;s\>r,sKU_bQt?a=gAo5/Aj=M!Xn>*k)/oK-BU.O3CUV8$YO`0
4p]6R1XE-lIk3`-YdRmT#+uMDVVfYO%.)4thlO/pGRoE0EHfo07qk(:Tn[,`lt(j&
&ZD\+ROYV5*05aL;IO!q#l+HbN4bUsnnc2K94Y<b(s@oD<u*TQEJJ2&@=*n%c:5as
C2bJe`7)UeN"I4-b\l/V?hhM]'ZbWrpf>iJOC+0gX>fh^UMN0noMZI";ONKZ@XiIS
't:;;kp.]m/FUTO#\NqlM?tgBQ3#>,P'!cH^f"XrgDhj[n$@uRA;MC64qOY_T%&\u
aI[^?HBEODTDs[A]rS%Q9u;dV2$oNXp1pI4@8hW[[:+\#+5\b?KCmCi0.c_S3PMR3
HXL^4mZ8SZo_k4oY3DR.rqXWK&P*h#,loI2Eat27,Gs$P@P91ckg?/j/E3TKgmc1i
/!eu-?k2nL@Q"tsJV^$oR&S&<0p^_V)1,k%[N6]6eQ#[N5:eh7P$YJd$t9SL_U5,K
%mBmpcg.aGY$.%.4WJ'L9Ari&/G;E)/0I\A#)#j%biDp_f3Wf@STRBS1#%V]HpG!^
U,$[WHl.4I$mk0CJnOb1FlQ(Lq5X`"r.SC\B,PDK(0FIoqTUhB4DNfS;1*58]3H<M
V_j*O38+W!MAqpLLe;61+YCXM&PR1GgpS]/A)Y[W'[f&?nADYnfcUer54ZRG*Sc8X
5,cfs_sI2L!<Z<@p-40`BHq23-?o74AJ5*c&O3jS+Ae+]W>DNMW>GU1VP7D@7pjn>
/aDRjPObJ\9gY\/rT\6%puocg+<X(>`JZg>*6]tn4jqB"=I`<II=QPH+aj(DLV6i?
75ujsKOH/<4bUW`-nqq0Z@quqBUIl`q8@UkSEm>i:<<g6Z'Q")%f,*%1W(>Qpq`=1
o#<3tQKEeS+q."n*K>Z=="MGs8_A7EIA=)XIkU@Z)%lkALE9?G9^kE[0I)OQ]<FnD
"9X;Z,THW*JIRY)Yo2CX::Mqn(:1J(ie4Vs#F#(/*"1aIJ,Jia3t$ZkYd5XmHgS4B
'F&o(0cLK/6%2+U/'5`pK`''-o?KEYo4rW']UKZ!7e+1lrqjmI!@pOc'a#G;/I!9U
Y$@B&g"A&E)o*Lu34)Hm<n,ON<k3>!G!Js7g1i-DU(5jdDu_0@B#Z!XGa`9:H)B^-
dZ.gX$r>(QS!@epEI8C2EQqUP7cL%6,%*1MADpXhRLuJuT%&\JMq2L=(]X?/U0aq3
gW<_(qk%Q/@fJarOr,2O:]uH=kqu,Yikl9kF>>Z;`58[@]s.>H@M2@D6?J_KJ(6ZC
W#XXQKVT<X07,G0]C3K"HM6^i`6,3:(P>Wi@D;a;CF?HU:<n.8ZJ%s>q/d9E1m&HG
Vd;]_m8]Kg2.:&Cfc`#577ab^!I=A*gXc`DF[Acmlp5b\E&=)HE[N-`ac*9T72b&p
<nYUc2CG<M$0bL*7fL'rk*o->Bf_Z1F^f/;8h'tXosOlEdS;tGU9`EG2.a(tjf[.0
K=3)HhIrCY(2"MtEH22Hle]=ero.LN%fhk4hU,mRJLpMmfg[OIV9>#alg5@d7C\f#
NI%ibRad8;hc/*`Q.o&?6\O_p8RV/D6L(XRW.n;bp5E$"!jZ(^M4lIJkH]7Shm.p[
M<.qhbHC/)S^E5n&Z>p8p8@SVQJFNbB6IjM<&3aX,ZNtt"Bp^KW.'s6[^C/">je:(
<otlto)d&)Bd\6SSJ[0'ZHUtC11d#I'dH">N"NU)DRma.db((b_!2M_Ca$Un1gBNa
Zo""[UBm_9T6`4t]U9]NW!7fLr?qtg2/%21Qr"6mK-8?2<JM),md@^U4u[TI:ktmg
=N]Br:ELt]DDP3\(5)s8&d%Dqo-J7rZi/rV^"@ch@u9f:5cB-r"?,0)UupBbC03?+
bQpUe#S;QW+i+(6?NR&do-I2`L'S?AoFVAZO-7;U0=sp@(oh"U\rnTa&Kh-C+9_o#
T;DU/MHNcI.>#gGL]A%.,m'e:;%hMd2NR\b'rk]m?NS4m!^qPEj9#GVVtlFLeUm?K
,^:U:7">QmLHqeePQ\EYr,Wf-<5Zj15cbe7+9Fs(8d*e=<XD`p"J\*66r5E]&Kh.C
73GPo8ckJb&\"WFTc-sI9$^b!!"g=Tfg1/eBm+#!U*Pt9#S`[2&Kh.GN'O=jPQ\FY
>>[`C6T(ruU^Oh!ptu8K`ufdFprteYN,FS/`eaO^Num]$p\N[I>;nLsFON\IC:X08
j,`">LE,=Mp[@R:=CR,m;1JN67sE38f=5IcIFas5hK^Eb^@p8rmel\&G:Tf&P$<;#
[7c5^p#;sKSoPWQFHP<t`uX!1M_81SZ>#QtVOMJOF(gnIIX*m@]^s]Z7RSZ-B.^Ei
.mlcM!_l'*Xo>\a<FF60"I^o<lGXUm<SSAUM^kG8"JK-QJ:eA#+;G$2oqOhbk_MKW
J@&W:`oss92b+s<[%D0?aYYXoXa[b8G4XU?qe\WBHgJ"m+)@s_r7GM?m12DUi.?0\
4PY8KXdY<4fWrockS_.\3pUJ3R:i,%AD$4O^Y[9of3B6^[*qc#)(sEs1X7ttcS36F
Rbqtkh,\U&Bp;\T^E7t'n\(GYlZ$9m9<)X4ZE#?;`ZYE.7Nei4[+Y+[qL9[8CjAo3
<o;>goL8GX]r,2<"YGHT!oX[reW2V\WJ%<.;b@(A:^sIoU)H%[@"J^_s8Mc-`$jHR
GPB-!HYh]RC-DUpo2#DIP>D%IJ,[!Y-p;nKnDsp,'"R1sHVu)maA6E#lR&iMPZMI(
r;m?Xi%YMaLb#W@Xg2^fDoO()Tb0i%57LnAVUlQ61uq6AfG4-Y5/mAm<4Gj*c.:q)
MkuN5IjZHPWZNO<mGq<4;"mcq.j=.F09AW`H/jlCG'X,+'2SC;VO>I(o#i[lhDNbL
QKV?pY`D!EBW;2YnDM+l&_L]^(EZqTIemcr@VN3@%2XO$&:o?;UtqXI/38te5ThY(
;D0AITA\7u^7\e+!0pkYTZIIml:4ERRk1L]90Q=mWj^bBK"C<SbBA`Jp"!=`/02`H
*0pWO0uk:5huE\b?[VC_,N:5#=o@^"n*[*@@LE.jF3f,n:s92op=X(bp8[C@Q5m`+
9*ao%>AQ#?Yd2$`bC32Njci^?9fC\#@!;(F`uaP5?q61pV+ZoJST\1Bo"3e.qaE<a
Qsnilb:W[_F3a#_STRuXj/T/_6?\4R]C3K*gMOEjL7`1WR=)2E]t+d-dn`3a0=]ql
IZd8LnOkLFU`VdJG[akG9IfMoT7?9QfjtsoA!U80nXFC(RK)?3:SK]6]C.p:HWg=6
Zd5fM0=B;-dC]1u%mTt'@=7e%BBuU"?[Yq@Khjo.jSl3`^@IBIe5K01='g16Ju.Jg
l5<CLA7t^EHKh80-=FO77N;/3_hQhp?`tI;]^nm8='&^RAX!sKLd30jUtqY$;HCf>
N'LS;Ug?`\76,d)0rPn8H0Rh6%D69bJPc:n$#CBRgVP_"C09"e!W+0/EffaJ0>88l
_c"tj-_/PupYL7Zhh;kQW8X=njr#I2+I_>L1QMLtRrA3gqs:*=($T*J-4&Lr@udN]
DoL(d`]N:H;`(Usko]uS'r+WT[b59a)fE0Z(ZS@2J&N.(N65$l#f$/o$dJ_2M_EYX
b1OIeZ5di!!?)2RFbLQ2n7&oMMd[eos8;Kcb:gUm8hYYbl`\'<q,^^1'b)[J4ea^a
*nV]t3'up;Z3IT?$n%Wkif^X@`T>(?p<lSeXebgfhgbC(^](giG)ILq-2f7<giLg/
++3QD/b?O9T'J[_P8n2\%:e-+]_C907ree'h/gn*4mE,C%Q`er9r:fOj6<$!&FkDe
:/D+R3dq&,pKDHr@sm&g+pX>QjZDh5_ih#k59`o[!bbC)dH(I][,aflfX8CldMI^*
]f<,(<`:YpD*R[7%K`@#;/4\Ka>=PV$.Z7pWQ]nu*iL0+gMXW?'Fcj9CTOd1oSa`o
_!B#]G?k1&Dni89L_.]:!XAt9M.c0:Jc##]0D.AJkYUq2&l^;#&D2gdR`N8@m^jAZ
ZacCU7G:O%rNuD9'>j_Bhd:#AZ-O3#O$<D2_o#:cg]e^6T^SRVi3'fjlB2;$7c3*J
iscHU5>]SF*s<?)D7oDYe(JBW:Fn'_H]1-9\`30$J,JgT5!J"QdRbgc+3<UqYIpV(
='T`6P[*\6]qbJa)oL;6/Dg-cdmqm&;K+T4ks?CaY*J:/30p_h%crDLW*OW''sH.r
O8snJ0>7"@DaY'XnsINnHc`kLK@g#EJG,!F>s8fj;kDKsKl*]M^7\f.?7]nII**o?
U&%W$euVKR7HLPY@=afZp"!=N59js/Wq-/dn#Nj)OAdPN\=Pj1qV,r']c\f]@<jOt
)eM,c,DboN(bn@pD8,i.qM^Qj\9n/Da49'<:o/8M$#r(eNAo]re%"J%9@US@&7Pr!
81nLgmC1kkbNV0U%iYP'ojSbuJ7#S3A]kTWUTnVqm]`c-FTm?0pYL8i*])'[H""7*
Ot/.<Aj`iq3:=#+'mX3Lor"F2;N`TncM_'rmA5F9=E7Zh)9-Xt]BQ2^C3h"Wk-23!
bIc^_eIu@B?'?95-W%hB[UF#)U`>I\*>)rf!OPl)kjj9iXn&8oUg?HYTjGs`s$(92
#(]tTd8IMQZ^*qT6iH=f=P/gNEU=+JC7WV@*d?CZ*ekE6PSMAYM]J,Ci^as2\mbUc
nhL9Y`>2\AF"r6b$m<D)#st*BdRbXe[d87cTKubW@R>l6\KK7q*([E+5oX6cfh<rB
9l_ABfQS6XE<9o#d24R9eeOMf1X)6*[Fo@h#IBo($4V3q"W-A8D.&,Fb1IA3ar/3=
7?'I<L`7_Gf`-lkh/JYEM(k6uamR(\:Xh4>\D[Y)mc$RUThFD;+9FDEJG,$G>s8gu
<M%]ue;Iure;O.ts(<q#+Aci<=t3Tgel'S2W.2Ji$i=#1G;0#CiIr)J7aVLmo[?U>
#*Y41cG;\<//<TkJHn#;KL'm!-*WZ_8KtCkO,:MWD&:L?CPiFQV6FSj:=]sda7k*\
K.,_"N#^NB?d)=n3=n^mag_H3[f#OlZHFkY#LRp\?]lol0D:>K^#u#;^*#B@+:';&
?(nnRa]S+lYe^7/GMXbSD\#;o%1i58,-[?tM)6bh,Hr<@.*Kmtmu5k\_e_6r(fCi@
ik-E9FWu@EMB?+f&?&U#e;Mh7BJ\.rq=su&/]&W,CHkuP=)-;aaE4A1W.n:_I#BP]
Ljn]a%.V$!Q57bX`U[&N7UXL9PKglYmpRao6']ki,-Y/N4SIE;q[Yph:pVf%KPR]t
QBqL!;bsg\WGs@<nHBfK&nL?eKnE7"WMZ-,:HIa9;:tZg645B@Bu):%3LbT5q<"1F
Zd1h9mm3=XaYgrO\C%_9?>ECFY/TK[;@50t%O<"5X'j0iK+GJ\48@`d2:"))4O^qM
Y(gpJMRl\KOb'?E"SRsJ*mo#D1:&PO7QBbh^#P,7Hq67?>rj1V#Qh-p:E(`Aj!H"t
$@,N&r[!IpqLX%@H0WB0s',>3$\;.Q-ja^ujP'1QKPFW^<5d((_fF`^LLY>D(h3uF
"W]@/Lg$E>Gm=g!W7H]3-je4>bJd$8Y.O+"IumL:9'LlA_Y=b"-60)k@qHALQigJX
?:Q#YP^:/LY@322G6SHmTL[@rV;ZRK?.ZtLZ+5#.=\#RogN3:=d7"jc>1hjC+phaS
X00%6qI/VFAjru>(AWN?A(DSho\df[Uh/.K]=>LUV@>)-"cfX7_sA^^Amr=Zq-o2c
O`&Cm,!Y"Wj:(&nO$#1D%BI[.",kUiYQraF7orVb9@m^0_#Whq7Cnj855F9'p#r,q
k*\`!0/XpY/<Rpnj]cW5`JVhh&SMFNZr?ndnps%Vj@R&[=50]D?ViCR0BT%-a`f='
oqU$<q/.Q;f.L%?W]=RGJ=0=I79^s@S-G;)@b)0'KFoE_Q\po.=Q.5]3d?Em&2^nP
++@<`)Z5^UN%gMi#DS,=]C%^;&;<99R*igMjtXmr'.j`L@3H1H9@IK!cT1/.[?:rJ
r%K@3HV?_5`u8_E^[T)JldAsuA=GS3XsZd(^AI?a@6b.`?odbGCTaY_W:rXi4f%-W
7[u"_&5UMF-Fm%9`G@0l#bm:V\M0P-),E4'=HjUl)5/*"04n`\+H'MF@h;UI$k&LN
&!1^_Z$jor=204_'Us.9`,'<2B/?37A^!.6f';+e7ut_(29Jt'*'f7@At4Mjf9OZM
TG@[3NRe_t@C(kW/*':8pfDg8?Mp.=pJ<MT[sqf-W^@n.5Pd$D-]-4_!C]8pKjJ!6
/7*f$ALB9j-)Dd9ELeX$Fjj#?NJ8%g\P@rpamc-5<([Dg+#RetPM&;N`6O3njAJPa
pksi:-V)OnmbPM@cX%e90q@<XI&WIVo\$:.f<;pbb/nIujtGm!C;%Rl;F1**UIVr"
^]%ESa:dZfGL\e]+a%f6Oct=s-i8t".'im'M5=`1+&?'Pa@(i+oKM>12>'Ycn'*fK
FL&[6am?'lrOE(tlB)0Z5'#^TD1=<&?'$*LLd4*/[(8K(Vp()u)M(r2PBua@R8fq7
W#)ELs(O4#b8LGUqG@mXX@]k>jU'JA>$MMK:BZIR&SO0+lq^h<JtN:?4G1Mm`/"C*
kWf8;oqNe:*S>VZ<B4$r.[LCt&HO(@"?HPap8@_L1?FoWH*T=rJ-_s35cB-r"?(\]
ANIk.%4fnmADr=E&Kh-(+Mdt5"cu[,K(;SICh?*=Ld3R)#h=toNPL#=jd/`D`jsiB
^YOas</9YDpJh9j.Ar]aak;bnmBtPhgMaj?53K4?"KGG"L)$XH9SNfa!@#n!#d?O1
>L=`4SFT@,Kq:\_#S;Qe&I?pJ2MJr('i6:@7_8'&ql]2kV%I\+M'mJe++LrXAX?]N
aK@,d#h?05ZLTP'&Kh-C+<UaP:BQ3:JYX^?$j_DQ+9Fs(XUtihNs6u9En7(N@mq*e
jd0?2D7%\[:6)u+Eiu:G6DoN"Ape%c<K8SLf3a$@PG:5sCR"A]dn`c?(i>P!aXHQ0
o!SUVKd?dgJ-],*!;k4p5\d&:P\1pAMa\on6m.[!K^)'['%jP:525J5gMV>ua9a5a
i-P.cSLO'r\`Y#Xcp7p$nK;J8FdCd)f3L14^+9sF<5ZjF>tU@_8+5Al(iuX^S>5Ah
)fIk19(e(Igi1.?mf*+PG?8$h772?mJ,]93mC1trK*Dc7REe`,4f-@!GMI1.\*0QE
Q4-j[74n$a&9@<[(HXVbf$-27N2;\RMEb-laLS_h7j]gna<FC)o.?HXY[PH)l`\&E
KopG"'9@6]mBtOcId=2PIMB6c7a;Wi]mB?lZctCt_\!_6LH-?J[+o]F3B>^BXg,ka
FWCQqC%7X/"?N5@c*dblQ7gMSUgEBr]bpd1W(*+RUDIqJ*0(rUG.f0qjHEC)MTfXt
=XNZ#9?s)Pn%JIePOmqmFONr#-#rbBQg7Ltk-<TOS*?`5S9aSaI!YDH[ET6gerRrY
Ae=^U(LMDiU5Lg=4UtY]&&Cs=:c=OMAOW$O$5!7rpuU17F3QRKaGJJHcMR7?bVG*K
@"J^_[*qe9\))FHs33L[UfMn(a40kNgXjV/VI%PWD)gF,(0\f&H*I:'++?aSl\mXF
n2&9BK@^"0gMTXm;pM_8pi9]5?ZF%"rI=nNasG`*G>CI%[$S+N[@V'X_"YnpO"?c%
^OH-g*?9(;&K\^G_hWFBs6[;QC3pOJhW:;Ra9iX+<sYgP+WX2hm;/i*[ShSmB^eYG
Z%Tmbels^UY;ntC'Dg1JM6(N9ngmT%`Vf&@GiPqrQQ^`:^%gs#chd=c>L*[#n`QHe
?9EMHa#?90Sj!$E/$7kkhgBK0o?9#f2r8d($7G$0qDm`/1Xa`=Jd_4ED#%#c\`T>r
C7'5&I95GqQcnYh0.STK[!:%`#__J5K/")t1_`QJ%;1j6`X+NFLpEc!FG1!RC061h
B($&n!HjZ11+h97^\m*gp[>;7Zd1hIa)d[Z6m`%frT'/<]SrkV/NORTl<Y!P7DdTn
QW[lQUTOOJ@ui3GQ=dfuhI<k:hgG%?.T\%<8p,l_`ZR`2#:5=N8eG/CM:VD,@g"]]
?MEmD,6A8QO$<E]s81^Rp9M@T*fThR5lg9P5Iu4bOEYtJ0BQIl`r?DskqWWN:+p'C
BU`kId6=_#_#ElE++CWJ<qGq/5JJM@"54m!(q@V5&6#!.<R,R9@>APXZK3bID`8J;
E.P_Z!XjL_Zf>V.Q_n9OG\mro6M7+i1onl7M#jNu'3LJ2!2@\ZKa<?H=G<_dmg6o5
FYs5Y&u%_sR=ILkUXO<%TaX4pX"!Yu_1T.Uob,nlilaN,5Mpk[[7%R<o[6D3PZ(=+
J7@HPJQc^>2Gi<RIjh4n&J"JgElBSR&qU#WkF_^co?J:(oP+X_d_4qGX0g\kn:<3!
#]r[gRP1Y*Y"dd78\J4jJ^(c4N48(E\h"o2P$Yfmc9#%8()'g'cD:H+?$9A8gg,-[
V1'Q$hgb[>J+_>nUNa4NGi=?V\,Q3dT*>3c"ST=^Ie,^Ko["K0K"ucT49D5Qd9m*#
Wi;lDL+.J_1/D:T7KA6"dhO&<WaQX>R_>V[5Q4d>5b,Wa6^2)Ie6hodC8!llr,XMl
X-L2&WNkg+n4#5gdg8?o&On=0_._cfP>CW.a<h?@HS>=ERr%(q^S?fG,!h/1Y-Q2"
lF6fmqa\H']^j2K"BP5LBUDq8SQ2#X@^OXN"XDp\GMh4P0uXk+\`]RUZB*NhYeU;]
m<ZD3[aQP>;8R>uHU61(,G27P<(T14C]q1O?:^tlr-2PXQb??>1S,tcG[g:PMG!T_
.m@'9KVdD.n(=Dl=NZlhA07d8p!cp`rh.oDEFR!`jXPW79*R&IW8Dm`*M&b?$jC7d
P6`_n!bQjlYJ''u/V-@&_pW#$'tSc9cmep-^8+f@2L1W:oj[pn@Pt_JrZ=s30-]2(
%mHrgY*d"6q[ia6i[_n,3)0'MIJ).N=m/#_D_Q`]mBtPhH'^p,&I>EcYmme%#^8jj
*go>;<'M:[^g[bc2:hPCh(7FC*suRJRHY%j#h?-d;_@t?j,ZG$IJ;RLA(g90j,Bb>
Fr6c#*e>i46@Ed8'_RGEhPffCj@]mgkVD.oQX8Ba\`K.VpYUJPJJmgT"F5P2fP.7S
FMB9u;e+l"";^l1JK^>Y_]^(W,JoiFnA>bo%)SKl'3Na)l)hAE>)EDCFJL>ia>EZU
qs:*='n07R!"t;TSfiaIO$A(Z?<F4[pE7_Zo*6@bi5J6=V?[0,.BcA6Xo.]>Q49U*
7Zd.Xn%JHrnd>DnQ<MH"\`]PfVKff6C#E;KL&8RWg8jT/nA>biNgBGk`j,GD@u[;e
#`/T#Z]q0g_$"Jco[6AiC(c)_o<*3m)""k7!fKGiDsS"/b814nhtYU\"+di?8\On#
H_Fd4qL?tM?E?V_($A[k03Yk`";V+=pj`,+Zd12$ILj7j$lMN`\A=gs<hWqU*o@sV
XqZH+2[7]gcghjlj`C,,#h=t?e#ZTC//$O010Jn/-ed.;-r!sNcP.JhR!F#DXgb[t
K(0im">b/K/2W=$@`J)f6P!0a8f5[>E5Dq[Puh:kg"O/XRrO/F8LL()*@;%0*6Jf9
m_8R9I>21%M'eZ^rD4:iON0>3KccTgQQiZtb`V$B`uK`)*rAP!%&4!g2V`7=ot0Ic
S(%fjRrBM*n[r\QC><dF&RqC=l(R^PPZO^VRVC0A9fLm-dspMJB+!Mfl-i0$0iJL9
R9,V?/FaL/CW;!/2q5OFjjGcXW3J8d1[jI`#qXdC$tG860g^NB6X\:W0VF0RDS#`g
JG+sE>s8fj6_;ecaTK/?F;7sroj[asZV%e[.<[/RBOOOG=KG!0rsMA=gu1=Frf&,"
)YiQpT3fDZ49joPH7ePW&Qi73M+J8ip-Bg#58m5%>(MjX@M\pD]^6s7F@quK/g,sP
DHlJ3PQWeJpYL78nZ-'D7UV>hB$[\l(je9IACqlXk9Q6b@ZPgm,s(eUF6bVo'8m>"
@!ODEZt7<$-h.Zc&^(bg]LU!N15#Oq=I+j:jOb6\;J-1NMFT1Tan"GL0<WKm/KV&;
kXa$38B^*p:&K7i\@;G+R-fkp,IWu)2@&S&lC-ep=<ZKBMER]1IRAhu8W$^0LRE:D
#$8*4R&$\">eeRWa,+At^g[KeR*-(N;4dFl=:f#ajRL84O4)u]q]c*/i^]=G"O`AZ
ojT\-711TCX72^,nLn19U_bQG1>nM[P4W3G>U]_iV]E^j;/@p-p+_H\!tRL*&R"Ic
NOr'kp<>PReG^1DR'(iK#h=t?e#ZTC/<\PZ10JnW8*&p!1eh4?m"PujRTM9mEEJWE
Q88R]hZI)Q(M6S,CtL?bLfgO44c=8N";\oj36GCF)Q"PWM^+fY=>@]$U5:25E<7Y'
TP5HejabR4o)\pt8WUJm!a@:\C?!:_`r/$kbbJ`"5,QIn>+EB;O)HHb@&=d:\(kob
STc^3^>KlUNa_amGW*&Sd,,@*MAe:[P>*s'mX^)n-iD=<YT+PT=Q0`l@h5lY\#!"?
<A#W]`E%es*8!K6FKk5#/jBW;fq7C3[HuHi%=(i)Q6ritF;7sgp#9?T1.a-"dUb>p
?Mr]IU_i'"8eG/6IcLGS4t0ld?nkTOjNJ`GnVh33!fQc&4RgT]f00Inl:4ERgILD*
PVc@WWi!!n0"IdunrY2QI3.#gfdp26JVB40i:6a:cPI8tL'ETY,n\eqYJ4E(R5';&
;Mi?7c+q3;&Zj[ZmbM*6%jO1B;`t7!6lUe@mP(,eHK"eL8pOEo+&CMVE@r6ZNuN#Q
]35NBV-!+#qoCGk!-qQ(Oq]d6#f)QbnK4'bGO*gSrG]bnr#P3FmN(SRJHP9)M7ZXg
eip_fIItp3E8J&a!b_i6dH(I]1uq6AQqUm<kpj%olUNH7lrMPMQ1Cph5H2'"=t`q)
A[Z`]\Ele50cm2+J_b=d*OY@R=g@+nXU>(qV/05KP!90:Z.(f%8eG0Afg:#(H8Zh2
pXqnV<'M9pZW_pCAim?_BB@C0BNn]81i^?0>;JrP>\bks0r$bJmm9.kE<1tKZ:N*u
YW!5?S9s\7;&JZ_!-pl`iBUe/O1uPhBTVXp7(\6/@"SoQJ=9mrbWoW\(KUCV`Jmm5
+9D$j!fSfUYY]l49MlUu='J@aET@MU_T8T7Rt8NrWKm%S']7>t?Ytj@0c<WJ^g[f`
n:`FQDYW_[rfpPkM0h\cPn^V0N%Z>4^\G4.-,bm0jRiHKn&LXOI@DG]RGp`'%g:=B
-hS\V@_%aq+od`Ukq_="8M;!5NIN<!*mQ[arsL.ubh:B)Ai%C'm0_[.3:ZGP]IQEY
++*?/%DV;=gKG6&[K-H'qU&]>eI%O0ZC4`>.rQBJ3n5FOM$lj"N\ZJ*<K*I9\)2YG
*4)$&K`klGaH>3HiE2LG%Km1E#I$>?Nj(f>MO@U/:`BNQ`clAq$QMVIEAe]URQ4Sa
MBcA6kQ`oE^_t^^T7$3$[02F+?'&$U7>q*pG`P5+1&K_?It)md'%I'p4AZJ,J.s4:
X<kn-Q3gt&e!B6)FO<Mq%a/$q>`Kj!K=D.+E.GDRO\=eImn:WTnZ?7*_bs#IHV`[>
Kb[Wbs7fo"m"$`piZ+"XcTPfh!>$g\731p9OsCkKK40VrV9P;r,t2\0.Ok=B#V9S)
0fod=e)^f8r#aieQOa5IO=0]FojT`L@a]a6-!c6bQ1X&VGMJm?>k-M5(pM&23`\Q*
HN]!$F3H@o)Oa(*B]h?I&@O4LYe1g-.[0S4Q6NOlgi.o.?$q<d-HJE>73GPo)GIJ@
JWe)`(B(>IR?_`L$C3S&+DBESO,aYi(HQH(&VeT5=mk@7:Y'opXuQ!Le6ZD(;IU^r
#TPmP&.KJ>0F%Z;F>./2JqW]ITUJkgKYrp6As!T[Y=K>5[b)gMo[-1p;J?\RU]VeI
;@%'TG_Y`9lqP<&8fZ4\@mR>LN$F,I*]'TMdtr-H6!iL\j&jr\!^[%\B#e.b3AL*?
1[p.i.$n#3p^]O[O?jIaOY>u9?NL_sD.SH"_s"1)N'pgA,X[\Q1O93EMLRUSW0F?Y
W%B'L<0\Et\F70/1uJ)DN5\Lp64CL\X+/Vr7p.NPF+SqM^RS9$j/\<.4K0-r(IRN-
Ujq5n\dWT$ks_[m_N?hQ^VI;h#)hO0Rr?%2(q@Sp'3;_Ri8),,@$eaE$1N@spfNY[
]_i`5Pp3H"*5FM`pYUHBc^+;C7j(bqWX#4i@LYEpB@A\jX>ZSL)@;37=j9FsS47[=
PD@779jEdHb\4T8UIRDe76^8uKpR`D3]SVC#q9p^3Xa(WjA3sZG)r8cZ)YQj5k6&(
amS8W?ZnbdSX_M%SpTlc-Sqbt#\S/(kZQ2hF`QoO'6<-OHCt15L3fBVl-XMqJ(Ye+
Ur.CC\tc&Nj]*aYPgJ;H6Ftum`uX?]8mp=5(<:4PZ^dfVKR>i6+5O;5TRFn%@<_P/
QUc>Bd7iuL,EHq%E8a3A8,g/8Ifrs&T=-t!fr[Q/nt]ScD?lGK<H>0Ohb&3s;I5XJ
(['MOH4`1Qh`W`V?N>r,bj%-=%+KLs[Yb=&nA5R(m&ANR(a6Nf$K"hX<eT=q8Vq\2
hIdgZ;#MdK/.$,Y;\.E_$51VRK?V-B;56T<Q1VF6Hm!1iXL!rA@uie,U'e"FYS`ah
-0fC+^k&Y,hnErY'+7r+!pi^`a/U.H;P)E1M0cE`:=P2uYpo>mM83RS5aDmA=b3I2
\5Z`0B+KPir?qt'$#Don%b7cj'$]qKArJHc/:1p^Au7:7EFAEBN(l<89'lEHl'#/V
Flri.Hcn"M3%.6U&51]K>BbB/;3m;*fd!V[ZFj=34_A*:rUsI7A[U&hF0`a<K(GEU
"PB@/8=39ib-O-S;D4?UM0cE`2T9TP^\r='98[k'PUn&>Amj_2!?LeI@o$ZKDN!!(
F#FR8eW5m/P/%j?kYM_h+OM/m@-Nd>^MmWt?>CpCRiI`Gc8OEn3NR)r<Pf@l/0tL?
bM(D6i`]W/br&7TC.7!"Clqq>\`KRKH>d?/Y7nfS;0:J%j>PnCF'\Jba6koA]G8-?
9th0HInG"K$\@lVTjB:2O1hAr1aL4NAP]EAUPr%mYnNg8TZ!;(P9]Fam%KEqnYU^G
#c/>/?qF`6>(*?(<KJUNL]A#0!Zd'sqpTp!Sat!k4BWUI5QoM*+B1Qt!_WT!d!A&:
XF`k95QllC&a2I_fUq;!k`f_ojN6*e!@!Uh!hoHf&m,e!K%:m@@21'1#9lD9Ld21h
_#?/t6Dls;,u<*H#S;RZ&I?pJP/*6r(:;pp%BCW!2L3(M.WS!md*fdYr#ph8iqiE<
n$)Pk=Up00@":enH$.kZ]59pgi:mKn1'/4Ic8]<$C"4-t]C3ITEmCibl)1/DS/^YP
][a;Z$l_)uO"[e(Eitt&GM[W40tL\8h0#l%Y?kN..*L;MmXl$6Lr/+_Wi;jnbL.eo
3B?D#Nu`Q-O[mnTQ21#D"Nhn7ao,p6>h\jV-d%X!nc.9(%rb[/U@5Ps]]>TI-jWFC
K#iim)9Fm3#0B0*J4.LFE`<U3N5Q)08eM:QB+R@j//_%E-huD&rT[:-HfiOg3jX2-
lrH9qm`tIsFSAc/G0RcPo]X[`2W\EEIsL1EB*'/a1mCi^\OcAi479U'XKotuAOU8p
#im^[)CCtn_SU[r55D!D!1n8W3G[4Q:rjD27c47FpVYngrqG?Vdl?@%<R%9K?ld$p
r_6B%XA#<4i']J`=+L+p9.s9`D!:`]Y7GEO\Yas\[S#cu&_u=6_[d7X2;'Onm:tL-
s8B2$qWeBp5re58_qH`@SJu-Mo<A)VX,"1@H:r0hO'D`D*-0+DV8X$,po:Bt$@D6T
\)ph-V3Qcd'V'XKl!`1LG7E`+G@&p:X0"-g&Ia91Kp2S?r""8JS)7m7_7AJQJf-bY
-SY;&]-hN#QQPr\#6o<7mFPYb[/P0X3-lj29t?YjQN39:+4%eS]-!87R9X92(tj'0
n](k7q&=7b0r,)HFibqr$o?*]K7<7!kFV1thu5OX2:l*@]^0-X`">Lm;56U7Zd(T^
CqorB[;3f&F,]Nis3O+D"el/"oriiSm+ps4Zc8_j5H&<<FTC_-2Y1R]C1(T[*<@N]
p])#Dd\2F;g3/C`fOBbX_$(Wc[TakP0jCrfO`sfiYD;]%Y%BZI=&r$s=CHp![Oqe)
E'RDtD7U^?-CR\1Kj")(O/s&%#QV(\,5R;3BY',cWMc<po?TY9?HNB&J,J=K=s%=:
479VIB:<P3)$61<S8lQahL1=n#`UkHr8sJe%c`L(Ni)W=F.e<kK0#V?nY.,R#-C*q
/dBiQN_R'OrbpGTmZL3q;9Pn-!4GENhL5.SJSj5qRiQ:H4FmD!J,cS?Qh8<?IpB$\
DRnj1(1,)1n\uMDdnVpb'YStpq<.'MX=8\-p(m&OlE\mK1YBHBc(bbV*Pc:d8Q?5$
9VFUuo(LgVl[GJ-:/3b(FLnbl'6Pg"B:grdH*!#E+'Z:jft@-,!-qXPH"GWEZd"pj
U+dYhpijLMSaKY7D.*(U'2O;9DneI%Z,[on[^#c@5^MUaG7J:`Ml7\IKeJ?8ZA<r@
[!;Y0L)Eo?p6;%]Wi:l5f<dYjAIAVV%+%raB<e5=6GLl+*3a\gD26T]kJ/55Vp!',
j)o1\`Uk6nn\l=1en^41[OZ(t^fl#"h1k5h*l.>a!>oD<Qpl%OKj#7W:HnSb>pQm7
DS#)0Yj/6h[KKuDFrL)ZqmWSNe,cYc=ChD&<=Q$'TfmjV.1?kM63.a)p&j,aUQ'#j
7PdX4)/#J5'DB*1c5Vd-qWRFo47=SJ_(:k"4YOM@;SC,pDZEJ4QC`BaR:2S%[L(]*
[p?,+ST`^Y[>"qq["%u?\"DfVJB&^X9_XoC_!p?A?RKGM'2L`1@6OMV^V9i_gMXVT
?igdWhgl"RW5/,eO$?ZPdXCiBVpr?rZea;HRn_.^aTpd;6ecmh^\m1H@B[B<$4*bP
I,c0WYN]S]9r@a70>Lt`2Uq<f*8>ACXdtdWZ3#uq']9];>=A,aln5p:U9!JCXg_WP
ZoA5np2U@U)"X+gj7f%38QgIe!)#@b;LiO`V<=FsDTh=[c@HB/#&uiO0VH`e#,sgm
/d?H2klnVR)=A,1/>3Hqa?4#"Du_HdRm6Z&F$fpYg/`T2Oo8YeqUbDtbBjhe8Lq!W
ZH@[o9=*9am'=gC"CSdlAZ'NeE.9C-8**1K&sBD*M)kS2c[QuJ+)>d@&)Tm2FIOpm
`Yeps`NOa`X&1dONahDoAYh&;.8*aPqWXoM7KFnuB(*=s/fhhR-o,q'04^<47_L,q
Y#2u0'Ta-M#;V/S:6Z&KMD0mm8u[*-J,]9=at'Y`n]d":&2`dm'2ORmJu\R^j2Dd<
/;et6!f$A/Bm8EZV`siA$S<&o>AZ5\^ARQFost-.D,\.il4X+lD$TG_'([-W:]*iF
LECs^A]7[FqnWLZ=I.17]W>dq1"WP(M`*DLAl@*'Am'tN@S2o":G)2$#@^jNGMdiC
\t=Tc4ue$riVA0D?5Nk$7hOU3f1D3,iqT?'I;-dq)fE//c83d/Omtm?_-[5I[=%V-
p]3ei0G-b>Y1Mo2pm%a1J,.9-o?B5?,f;"PPa1N-\t:qe;@YBMpc.pO#J/HX/f.eG
g-=`+cT[7"!&BEHOX>'!_%l?XiGY,h[*5hs*lZ1M:2@W(X/bcV/83Y`6u/f:]_eKM
5ZcF\55X\'\TTN^o6NPQ^Kl$6=>[5e<R%;(8QKVg"5&`!-ESB%nJ%_NN.<e5G"0mK
7DP_oMs=iD#7R/<O(_amX=Vq[(QG%^\tTA1V/[X35YVKZ,#FpqpY8]rBJ[SJ^qUS2
McNg+!3hPZh?]3mrTdffb`/B2$>X4fq<"/m/-2.q^R2k&q$%dST]^\;eH>#1!N]s]
U\NWqg'RhWD%_At<_dtFn\uO6ofRb/HgS3u>lksZG/,fn^kYYuTNb*qlW-q0W+C*4
c91^B;9Y3rhBDrh((/AVbH9):Oc%U\H<^S\i<Oa<n\rU1:rWOU#TouDi'96te)d=I
`Ur%3Q;kHBC2'4AYdRqVml4@G\.hB:\?]'3D&:"!m*)\R+A]#+7k9e)efY4%,C;OV
5Bc'9`!eRs!1b95IIbK-Wf`RfG=/N5SZq=PMlLC]h07b9I)NZd?T?$C2,i&3cT\Do
#SSF;ld[hK[&6Ja^euBOBc[A\\))G3So_)tR'T8=\>u9\1a[I(2Q3;E#=&!7k*M2*
QG!jFU)?Z+XI(q:#rJG#=\N>#XfNG>Wtk@(JH7_b>L$J/@*:%$&K4I8/[a'O0@)"X
drdn,?@-POStZn*f<e\tmh]94V<%_/M[/`<be7e;)?Eqqg.N[N+5Whn"CT4H9)F=R
S=B[m*9cO4>1NmRYDr_@kYIP'U\i6r@Z7Vc9GFrOI35[jgdqLh_CoC=AV-$rU1541
;S)q[AS90)_*"l8*d%HER,b+:WN-q>V%k6lA=q8*L9cUHio8]qFK)Q&[#LH4arY.E
,S1ZW164[!pmRe+-_#3V!/l[ar4;F<)mrC/!7k0ilN(+*7W>"TK`FpL<j^=hC]V#)
!%bcV!A*=4,UrIX5Pe4kT3H/J)1WGd:;*5(Dj]2JN%':JIJ2?(Of":&-&QaHo[`p+
\DrT[/L=)N!0)8@E7#,?!%U7Eg0P)k'[`fL1%7BU9J_q8Dp$(qQtM\d,;N76!Ef+b
?MN[D*%9hI@t]nAIrM&"rTS?BbZGa)\VM!KPZ(=[P@_fkfooEACH,pG\qoot0qYAf
KU;pk`]/k]7P*ni-:&"k8UoIuYV&!nC`LN[Woh^O,c`fD26\<P4Basmj!jI"^&S*/
$`h.2&td?BP!n\;NGH6<fnr6HC]g55mkfR6?PB&6r+Y>`Dn[VcLE\7@&:U:S!a+-F
9nBK9p=1qBa0c>kY-lhaqTKSb61`i4WrU`=C\JY&07^Y;K5.EB]V(Rh_GN3tc[<s_
R)KAZP04-u0oH4B+f-@_MsiD#Q$VPgAbbe'EhJonl!SPA]2.7BrcG\1VG@G&/kUZ8
N%@?)9esg9;0GOXFQ.$L;-km;o998X>`T`^ZA35_(0mY+bK$c!(VmWKXKcqV&#u'g
*P`0O&1W.uWWlLDl.K$f%p<kGm$4M]TGFmWJ$"TLr$2jWBs7Xhf?A^,Qt$X!;'imj
!/ik;;4.WS5ZL;K_;\gRerl[koDudtMu^'^9I&$YVY0"-YS&rn!O:Hj!&j<#CY-t(
;D3U&;X,TZQ#2JS6o@q<B\J2fn%CYDrUeQQ;XLuVTI+/)-H+u_hj4-1<!6T?5<\*E
M]GR<JMI^WF$;0kK;VekJSt+XbJhm-j`7VNgih,!Qp?gnE>/[Jjsh\3kua,J)LuD(
]SO^^34\B,imqM6<AfguJ/t_2e*q(P)H[G!OpnP/rd()Xg1b%(<:RZSHgeYuA0qIn
c'6gP*aTKMd>%%;r$X;SJJZ*!jY&J/?PLdaXftOd[L+Kg^!uHn^_7Vc1MI"86KSB>
C/ce=/ch:-&#C>A*b3>"W8\e<Tmc[k2ZiQ-lG:sUTPLF=R*ZIj@FV5Q>3>J+:Trk"
H/t*m-u.\j='r)]nNBT\R:V]3o[KBL+'>n<<>#>7n0`qYQoss`5SCoG#V;)sD77%1
"gH#gHYcqsNAWQ`1Qe)$47+ka7SPSA4;@m!flpNn;T-cVrI-r?*8nTTa/M9_d#J$H
\N"o:\6LTacVspQE<2MUo#ZYd^q1,8iE/D9/jV0=>c`h>Q#N;Rs,^EaV$3.c=I5R-
QNm&kWd1s,a_D9*'B5-;+KZ`tob;p5Jcd\u!al!u6j6&9GDasWGMO\E:oQ)S)TJ#/
^c1%f6bNs_n:t:jbr)9_IB&M(e5K-`O#lR)Li>f+8KLQT$09$^,[1;C9a0%PRL,'$
%jC8l`l.rEUm"OlQX4uP"fgW2)DVG/7p'^@l1hb"0SssT@%r$36nu^RQ$WdoL&VMZ
YP?&!#%)4OSHTg70]V&"cd"]7:B<M,RHL7PKGr0h*t7?%&+IXiGnjl+W[Kt/@8!:L
C'MK1Em$%<B"Ce?JE7ZI9D544W61Jc'i>QnAZHsM;"g#']#E-g"3LW`bKc.Ii'=dJ
e)fSh.fT]Y/f+D$#e2k[XKr[JWhl!&7Gc@qi*p\qZ-9fq<amM_TZb205^D=B(QQ-]
i<PhbnKQUdLGF*eA&10$AH::mB:`%SG@&f^q?9tKKajMf@p8\\%(iTY'O[Ce=7l:D
BQ@2>Y^Ypc?`8mB]%NI?IM'BBQ"TJP-/q-,6oY;UZqsl;"K`"4.!>-"2?=To'Z<Kt
#Z/b+J*jYqJnRl2pppUUjQ]58Ah?fRHH7Mg=tQ@e+PA@o#a!WtU+ZPj6,:$KE%Z[N
-qhm_Z)P>8<8H3?e],]T8RRa*$,iWe0"YKa#nG-3^O-T0]Om9p"s'JgIDQ:<PhkKd
c@IZ-k#5o>k;^i5rcG^7Ej=G_4<1nFFc)YgOMI#F/>+PnV-d@^&)pNgmrf=7;=AY\
fb+\i2KMmik_K>F]S+&jat#b7@f#8&[tc!>(3?XYJQ5sdVht[:Lc.&Fq6<]_]uCY7
R[DZ\h0.PTf:#amSgjkc@DPNE*l%jL`H4(q^[SJiTVMoZlr+DhI+hpJli#M)rcG\Q
/RQ+5(E9cl#f+%<CrE`t\6d]Jg9Uc[*6*X+j/Eec[PnLWrpc&%pdPH73_2poK9uZD
0nF#=`uVr2Z`U6Y<F!,58oUXM_4#rY<=/sNE'V`("O6D4Rr0._PW5bXp=_[]^3kPE
eCRuM>sL)1@^7#m5<#4:jms9pGTfVn/%na&RhaGJJX,H?62ZOkR#D:'QD`hbrJ&/J
JBt.le_f5US`rq:Mq.C+;f].2<o.f5%7+HkW+D3\&_AkD/j#Q]hI,EDC*)bF!/jG5
.]]W`[blQ2+F@4F_[et:!H$Q(QoW<t)+"05e)[Bd*P`GsWN(ML>l%j+??FR`5pH$%
fr@G*<hQtC*ddN!;^?U?RM#_XHJP)qI&+W-pYAp2T`iCC9.dPNmC_6Wnb3J*fW',,
p]C]QH9a@N#9@p5&<lQd7R(i%,TQ=L1griq*.!*8hh`s%X642pjC0ns'n=jY5oFH@
J+Aeq"C.P&3citWA'7+Z<&Ka1/:_:H#7W4f&%!>iOgN]u''(D/-UAt-&R!#//$<!d
f'IqifO@TU26_s2pJg=+F20di3#qG`[(lIkqm4'6e"=W?i#LrE#HF4_HPXEVA+o]X
NsF@Z=Z*FUI.E,7H01N-<m?Fg!"CH\[$#09AIFWdHb]Yu1!?R8=N.-27Oit9#bI7n
)UW8rR3kZ!itaVilDd8B%2,59WOnaIjr%He?#I47Jj`@OGRo8l^]!P<_m\<;gG!Qr
)*[o\UEG[;eX]"#1'WR8=gna>6IK7b&iDGg2rB!Mm^_>7.tVSM&7iQ7+kK887srZ5
6S.@3"N*bSBF!5I.**0"Wm/"ps6Ug:%)RDG45B7O9DZ1`>qT/BIem2"VVK>;Wq;`#
2j0(%X-=V?eFM&U8UoWIs8@IZ'_-+!gk;8Ho#W"Y&ZXC6U5LY(DME=aOmL#^)(X$Z
JM$8<s/hRhQ-H':l)kY^a4$.(<GeLPm^_LqGucQ4&s5&W:Se'G\FnEWCFF/l;iC%m
C#rCdn9n9W+Rk)eCt;g/^"W5o%=T"1e474)rC::C*k(p-Kr0TiMr:Ofi'7%uP8iXs
b9FAL.b^Z*iQ]9anA#,:7,((qrs%3m*I?qCF\?9R"1I?#mpA9QhL"^Qr9QL<H#0T^
6m$mQ@?eimEL'a>WEh^akbGOJp'BeeEO4#-ZtG"#2MgU(]sX@-@'"BV&E_HHb2=mR
hTu/bEj>JWe?<mIj]%AD9!?uhR9UHt@bj\Cm<I9$Y_\C-aPgEKh,Up;PkZDiCng-n
^!H3jQ(8*<Zd1g>b>TZJff"nnJjt_<<QjP1h;LV!o4Uqg""TL1,PuBLYd37$74YDl
KC".X)LGFUn.l85'ooi)#$-FPl:=bbA>$@A-kgR'e)m-<*nd<s=6Y]'hMAHEgN<%9
o:+Y$J%-)@'itG?EY?g8l*@A6ptbCf2mPs@2:l(HGM$>Z.,,)B]<B!KqU0-$p>E7r
A>NDOi4i:s?oQbL'?u^B=M)=]J%bgThd?-CX_M3LX36!Ja+6OE:PZueO`P`]pSZ3R
C<'eub/KT<ojh'kY=pQ@2#hg:"W-C:^I8-'['"E(EQ;&s9R1)eUp?,0+PE2;8tad\
asj5:*al7Bs62iX/Yq"IYIs4dXn3;a;hn<G3)J-fg9W-Enpj@'65GB9C1_g_ZbPTi
'290qZWEum&0$D2^QkelZc2Y!).r(p0.*F,9LSFbn.Z`:ej$k'hIbJbpYC#u!J`r@
X@><)]'%UF?e%;CcThI-Yl=Lb(M2iEg(R7E&T5A^p5fL4@\6o"8)nrGqWXmoemE>'
"3dPV=_&-Cn6?$&eP.5>ki.LRf)91ECWuY-+$$0lm0O'270I5t,T>>m]-!)&%bUe]
?4Fn`/%k/I3%tX:l#O&/dF*>$,=*rZ:Xr!:V0VCK7IoCELs-[^?b9#JmIf:BPZ>:Z
rA`hrUXq13"rH4+7,'8UFT;D,!(fRE<0/M=[-`'uHe</@bn_unIcm8G19P%SZLcL;
0@^n$O$<E=RhOC5hq<Y)k0^1_[lggrHF.2-g[75&SpG.i`35a/Xh@^tJ%q4(8:2#a
f-nL>]8i.hRE4CIM_?+t5Zj8Q=e[Hf7#Acb1E"/jKp=hQ!!I]5I:sW)bc$@K-7cCB
CQsgnU\Jt$<aR",Vm6b2S9)t9FgY!l?T!PhMk>K]=16^XD<(Qcc`_HuY`@`+W;eCE
7AA_?WMnW#>7X-l"5!5t[b,&cg-"p6E/L-%[[FRRp=X)>+tV_"QX!ug`OF`R4%cmK
\A/.RBH*o%g2EC(B(=Q5R/13r.R#G18LFGHbr4<EnP?Wq%A-c+[6@YT%BKi335lS1
7/FnoHsGY`]Bl7S(2t'Y.)tMKRkDk_[BWDh0#"4QUm"QRqdF'E)8]s9^(Bd;R_<O6
R2ZtnBQQrNS_(["p-$Q*jtt;ORao2O2J,i2i$1@)l4"43dX9af*:I\o#,+7e0"P:E
H!*oq2C#9NIq(XP83YmKnetWe1&0(3\D`0V;>LbfqYg0GT1QMU[FSM3:-7jM6`el0
)HcQ[p=X*Do!?_5)qjWXgL1Rk237Hi$1U@n4V[YDB:gS\[aiE`J\1*:H^9+7WPlIE
GJF$G"5!qc>?(d+fd>\X+;(L$6l_D0^`/rD)s4H*TU+L:O\(Vsa7iE=@YqDJVZKuK
(iOpnJEZ'X:ECmRE'j4`P\m#ApN*X^-<$*C!%bjWgp?Y$9.LrlePFL5I.0E*=b'#6
on*c=d-Iu8W:^..!+EngGF[g9Io<Xl;$%3j3BeApbXh35n\uLmm0?J(/&33K*coO[
KrbN\0!ibW&JJ*eEA=e^^]p6/!WtlJm&^7h1jSqI_VYLco[[5bBcbD#\,nd(Ki@qI
!04A%WI?:*&YUO:<dCHQD?O>JgcSs#%#F(WJUhBEYsJ)aN@V*7JtDG?hgSUSjqlL@
h07bimcWM\&'is/G(Mq2k"Ooe>*Q3a:h'tucTLee`dAAK7?@RSD/l@O!/ju9Hnj*M
U:,>NG<%p<n8[_(%Wna9>qX.\EcL;mVH;hfZa)'/JhjlMH&;SQmjS+sG2.(-bGN&4
"O^knTM2qfYXm*7HCfuo/9uKd&?Te5]:X;'"'*U@Pt>"l:cmB-mQmm_AahH(H\9ko
/\UB"!Go.gb]mB0WPt\7S<u9<q'&'7RPm"f]XS%\4&%/SV(UK;o<5gtb.9&mRSA#0
%5Ui*p`pq(%,r-a^\R#]oc0W]AsY?GB=mQ>;r:.nI0cLb2:Iep:a7;%26_o!'9Klp
]'F*[pd9M2+2.cC!RF6@mokr(apP6ART&cRQC+$hpuEE3ZN4/bGEe`VpX>c6<7:i+
U]XEofLBPR$"u^l2$a1URuA7KF!C[C2OcT:YUE:_YJ%ANPK:Oc$.)ISJ:=DQ`<Ud!
lVWe;B$gSf[?r9+X[N6`^]P*HNOtJ3.Y*3pn::`dVr$>3rP?OR5<.#LrcG\1g4I9)
im@^!YK4[pAQAR07<1,r?3FZ@ZK+6:?^s=HYer<r`"Pp?MpPteG#K+Y0>7#+ODFPR
QX>84n\@4'<c:a(k<N&=BP!@W)UpBijlP.;@!0EhD!)%#;%;(]7G"P7"#s_(RjTE5
'""^gOb**(<dZB=$j,.A#VZ6SdYSSG(MT6S6YHPK:8UFd4Rs%o$n^SY%mM$7R@L&2
jdL`<[*Gs?96tq!5B#)<P*cKYpY9hNhN+(#8utog/uHU56CZ0+YC5eRWr6ERf1^)0
?il]oHLoB?2*Y^&='pB`*hu"p#u.K5AY]=7d5*]_Yd`D.Mq2%<MMeAjc[rUX#l]a#
WL[XMM6;[>]&)W(CTl"<;fk>/FS`.;[,8NhB&NdiS8lOd[:8_-QG=3%Vl'U'<<2pO
F3c:BW6;/!35@N8j4#.jkXL'5>TCGukAkS+J#4%C@On`6I=f+:9WrG@"CQL^i]i4[
>=taqi8#Y)PQXC'/os`:"0gpf`OhC6k;cAh4Be.`[0F#H@*qq^%Z"^%ZUb'IreL:9
!=$s_g0,\mi?.5$fP1Y\ojbD+(73%@(D5_c#U)rReP9!`^_2cik>)-FIJ;QqBdnQ9
#a*Fu:D&,bM:YFI\H`Q`iu;?(mPb-(G&uMck:M,34FfTRKG4"W,E=`-F3h,3*inP2
(Mb@g'*'>/aSH]oBELn@M_U&H%C+__]@[V59U`/tnk-MNjHmSS!A#,R4`_hJMr-"$
9sq]9W<o%.^g]'PIr5i!h>t=_5'[g<Ho\:\1*9p/hMC`SqPKa"dUtiJNfUI@)=r53
bqtUcD`#():,unQ3dKp&b`t2#4;jCj@JZ?Hfg<KR2`P4F\)(eX[pliekXL'5>T=2\
>qQU-Xh>hn>EMqM'BJ7aHB$r/!/jhrs#Jr(;DO0TVk8E!9i_\=(5ZU%-9FqQ#(N1)
c[i+Yd@LBCH/OVSN;t@%o^j,"iBa!6*Ge^bXCbX)i1VnRI/Fa_d-)`t'#:g).D/%f
HIc53WO]-![+31tG]M%//AR'_[%8]II%WTP4nHlR2?+S1XH@,HD5J]ds4BF7:'#`U
!R6B65R68kb'f=5njqn$!\+0WD:6a_4>aQ[7\'dgNLmZmJ@/cVq;;]=YZ1[mH)NVr
n41AiS3CeEnq%d0I^\9.5:fpPF"@cd>Ah!m5'H15NZ"JUIEf#bH`U4arK0$k_K;>(
.F4tP3'_u_EU"&EFJD'+/rg.?/f0<BB6lir[N_d#-cjKMoGYb=!#DUp!Y_`Fg1m&B
\-oRORg++J_&RER]Ios7ft$@ES*E+q`LTrj3De6g>+&p/#,M=+'?BIk6m*6DaMTIa
g=uG+)Heq>P:pV"o=b[R/^,=hR#RqBrJPh2OC0mb%4p'1.A6paVh-WqDu`RON=<TX
L*;.!_0;Un)_l>r%N0f92[X$ALAV0X8kHnAC\k[3^7-J80gLi`K-XF07d.0:>EC6u
V\+Fqn3eAO^2(&Io]=S=(eqDhjZJ'1oZW9p/C-re7:<3d!#AN$AX?[\k-`q;hKs1b
YPoI/)@:0Lj\:QuhXn9W'4TuNrn:,\_1?LLVnMW=rS<?KoV]l$Q]#E%Ye;4soDeA:
=dA,b,Su@=/GBedP=9\R!C@o$/=5#6_$Kc^hQ\Wq,jFC5^I+:f=EZFW^MQ7lX^(nn
$jWf$7sc#einoN*-MHf=HkS%8:h(#2Uf[,o$Y$6.c?.CR/[_'q!DjBn4Ip"b;;6Hd
^"$rI!*^h\M*EHiPNV$E,,c.;.0..OSM\-UOdQGYZrb6rAJlVe4JL(%Zli%4=[a;f
C6Y/-"$A#r.*#tmIC=_mc<4$*fa3aj\Zt\DbZb@a6spE#=7*b1RQ2Q1;^_;Ud@+jR
)0ahP\(W.8[fg#h=EUEfZkNILLl!1t/6Y4?#QCR,&WJ=gbhS8YWq?rST*09lZef;d
3T[;BS:'8t2;`fQ,q5T"%Ig:0W;+0&c)d)l8,/$W0;dWS#`qH)0a&sQ]1(4?:ifD[
!%]JRoFYTUWAce%J+.IC%h<]V5@#nQ>jQ%4=S,Cl!l4AEOcRII?+bfpR!m4:f4`^I
GO`CY0iA;2`;^J!@?]0-(^"a1I3>@A!/j8[)Lk#U;s-/;eN@$'A@2WL$RkW@RGSjD
<WTB4:929]H""_W3e)'(k>k(8]4tm,cu$L)[L,i>O&Wmr5_LQ$VCh-;pP?V#-Cd1O
P:up1!)_%07.Ha7]*Np2NHVQVMY8,d,\aWR4E_fqR"-.HiaZ_l:eY*?G&e,>BNr]b
35b`r&:UJV=Rn/K!O5+1n\_dspm;t-`I+!X]e&6KH3iHj^JZrj"(3Q";cnQ-JC=KW
ocP6!DLrS=&,9X3I_!aqDtmei5!FL.MkZ07TZs8GP`'1SpWNm_!&"(%;bf3re7D&+
#(X,OOn=(rh,em<]kDi!aB3rjosH?()W7lZ#?G`K^[0QE4[l!U8Q/f)1B?!XES)I(
HG:JMk<%SKZ"E1m>:,"8f(_&!>&q6qJ&`$(D![+Og:c(;3RFo-FLgUUYug$rd=8/i
<i()bj<F'Y=IC>uq1%r6QbIfC#',lN'BCe7AAlQ?GVA%3aSqP%?af,kWCV4'^&gR&
[qLkhiQ&k!JG%B19DS\n87BC_H$RmpA2"M*/.)rPJ07]RK4pg-]^Q-QI+6:Rbu'Rf
Q6=nY+PNg!ief8;Xu1PKjp%9^U;q2\g7HW'rRaiY:mYklK'[b$kSIA.lZk[j%:hTL
I`=RD)/#I:5A;/n71B;LJnSLK=o;QXJ@@@n?@V+*B>PX0bRnBHj30CNlNf8^#79a\
8XI-]_M^(](h@"*+Hpd,>'_CHaroUhaFpb=&relaXN.&L%0B.SJF+I+3^^'6+H^Po
BZYm??\<m[_E=.:bVNJ[U0l;u"p);$J8EkYb:SXXoOJkW'n@35l^X!B:DQ3ICf@->
:5$40+e!BKhb^dqa?*;'(YUnT`l<D[H7SrSAi\5_rcG\1\lXu_/f2Qecp<qT@bmmL
01G=^A%5J;W(;*SQ@\#A6OsX3NFEI\6i@)aC*ajuC*)bF!%VZ#5r>c2*6*V!+:DZ4
W/MBa;ioAZqD'[,Y&O0pLBl3R[EMSTYf//oC1%dChOgdAJQ397.DXB(>\ic,,QL`(
8E<)79nW3k2g<_Qc8@K[XI-C#k"IK7%hhVj_-#iM=)T)Jq:%CO+2?[)c1e!V`TDHr
C/1+RX`A6"r]G]GG:[#F(O*#)<hA[nl?BY[JZ@k[Scu>2O<fVg?\U:KQnH#;Z66$6
6))j5Z%W]tC=C`ARfh:OCMP:t%BN`a")u%X6@6p#9-^S"!3i6h7m-bBdt@FSl@0m-
Ej$,V<qZe/J4^)!ZM<Sm]@g;_T`%?l/#H-#%BMrf%L?Gn<Q[/]_lhc&BSusVT=2_I
T"W8CZh^bD\_'$Jg<&T"Z$EJea\I\&&_:98D7/:9f;.O:o:3_\5ZRDhcN73.,hn"U
nYHW^^%\,4!+I_-bFmM2.prqCGKn#t?`W5f[[:Q)%BSR;q^[qO.=R%<U&sY5M-jr3
*!I!`VeS47>7LfCjq)'=V.pD+5\VdTao9,aP1NiLSZpUA9@_>B4htn9o._K[fa4%3
s6OA_$O7\o:gcJ/l7EM@I+hg'1#1?)Il?G^bJhI`W[`eI`TB-_,WiuK2TQYVD-:g9
=0(L6j$6W9BMS_4*aSoR"PHZu8DkKL"m>[3aX5WWdWRX$/KS(q%BSR;4k2RN*,lAr
%L7AFmB=7trp6ifoVZ[=3![%@JZ@k[Sd2Lm=GnW!6qe%&S[De4_J9Wh$eZ/m)HatT
H`D/&3T(ko*"Makg0]9qrRkQVktg=ZE"6u^"'*U@4Tf*^+2$Tj/(C1+B56*H7/b3L
==[TkW6Z9BMVEt-joDiWZW.I9imL!?3T(lr%L`gPHp6r$^@qQmYQ"0lE=Or5]$Gr-
k0]b$YW/HMJIXm=?k(URo[--]?^q5N7U0^-H;t'Jq&6l;P:^U,5%hei:H.*O6aiqu
lg=\W`=32+7#"u`Z,P4:S%o'<6psd^S!k@@fKlVWHDtbg"olm2T79$EJ,Jh223$u=
\7`A6Q4'uGD8U^,H0(;6)kr+)\)"K$hPrAZo[-/pp:F7iLkQXO\E5,8<"H^G_uh^1
hc9C#Zd[,O$\>T4r"*4OI+-`2_MFk0D#)"MASf7o,l7]L[U&b.mscE;h/lRgp>7bf
0F78a)f-Cs\+F`k\m-42/6slg4h3PL(P6OsKM3bR6kM:$(O=WEj,Q4<.]]XK<(,Y-
:%je&XU'i:/O'!kPIeFMgH.%!kb;M`n].hu;^=F2W^pFkD%^VCq*B.hT!HsM,p[oU
I^5)1M;.jII]du]AOo'!h5JuKXS44F[]TD-bXrqjNsZa-^.=?VaMuss/":1X62&51
:E3ph,YA3mpq[1W%(f"5S4!ZC('RCNUQ.B-lWRngAVOK.eHLmM2+lUM+L^R0.k,DQ
"W*+A0VVZ_1b;E*8!H0roQa1qq;d;+0>-ek./W0sg&J0_hPrA&i3+PU!c)!XLD%9]
b$K1de];(3RTBW%4QMSkimC7<?'tAndn\A>kFHg'k.1ig-ufB)ohjoH^@se86WoYa
lDgoMFkP5GdqR,4)f-&hb\##gPNFkZ#kMd%g_fiIqmeps/rggA/f2Qg>TD2p0o?^C
^73A&b:I@Jk.%!f'Q>!e4RkgfY7iUX\^+$4QcS,kGMP.%2VW'<J--:c9DU0nG\1LK
giLd^T7-Fd>+Qqk.1>Q@>T4ntaJkO/<R%;4\G4WRX[2?)=75%$:*PWdM&$jKHgEHj
Yd37#716/KMZIF^?$=mIDR.A2EJc3BL^mfsn#LbY=?kB[dgt%IF$-L:Wq::!!u464
WG/XF(HEQImD&]#0qEPb3pEGbi.2+CVoXnRqqqGQ2bM$D.+)ln;Z:VCIH-;GU9)-g
?&WU/UOCc#^e.^W'ooTJhK7FNAsDM7;76dhf3EBVN]Yq+<SMs#p"(!\@tL-QOYW)b
@P*4PSHlAHS8a(?FllHr0^#;Y>P%(W#%5!]3!SS=n@UTY+#h;m6((N<AB0MPf'iS%
EcL^_Fh'JTjC1/9n;bip/U`[PYB*rE/rJapPcZj=`5md(!*6J0ESPQS<>eJ5@WA4:
E=[0GD7@Kpk*dgCQCUm]`7)\Cg9]-m$gI?V.k`tkJ,OMlP<,4gEhKFXZtBAT*r(Uq
T>$!?e'i@mU!l;nVDW^*'a'57c,`Wt'YZ9;n>lh%kqueqRHR1S20q6h`"G_]q<"/b
3(<VUD/]KK7K:m?Y[TMl)L"$H@tPhPr,H![:@"3o>d`BiU(gHf5tueD+;f%*@[mL%
1oO>J3Fr?#f)qam+\]G=IJ-g.m@dKHbILPe*#Oq9Zo,"Fgt_kbT.UpMmb"VmnrY%2
e+R-jd7&&+"Vunr@'pAMXh7(<=_%eg71RJ3ku"lObfI_@J,@t4`L6(7&nQ"6-t`-Q
9Z3r+>ej<6^[o`4[<)n9A>cs8BY>t64(UEKeNDPA!;<:ZDMif-Yt*7bn]cqi:H`ju
SXU1'8&d7/WZ#!WCduH`8+Xa,V>upKokC:k7aob,0o9?HEep)a@TiiC4o=TP[;>o$
2:bksbu85GH0-N%'M$A(d@eUQT+R'OD"XUEQsi<mpMaKQ\l\uD17rsbaeSXZ`d@0f
=6gM!Mo^Q%qgh6,[>j09WKV`;?Ds1sFQ8?><fQ/;o?XV;W_CF"jmnq/3hL``WFV!i
4C_,KkF?VYo8:kLQE:r2^1]T/'!,'X55X^#*[Yd"\)2Wrm^1G<g3u`'`P5=*A(UOA
rReJ!0]@afJ,$o'o^\c<4rUo`At''UN>f4nm^qr=ri693R:ib\q"3$2Xk<EH5Q+/2
P6`T,'ie1QnV`FN0>G/g1=\-,#NBM;dB(ss+P<,+XA0Un&dP'`4(F'3AK"[$0,e-F
5c8)lWttS>1PUoOm^S5&[L.qG0\8"B_UKVJ3OQj-j*PQcH1###5em&kb=.bU@p:S"
nA5S0?A1.lpTNNWfHlkhEX73W*J=C_L)Y#tR;/s$,5qN<n'@faa]`J^'rRUG>('2P
1k(?n-h!8/VJW]f7VPmf((O;$O7j!4PoqZdLU)\Nk19WM[JpKlH*sK7Q\M-L?@2&S
1#%u/1_G6Ap].77P)9B"+HYakHiad(#`tWNTUWI`dRu)5"XL>K`o7;:-"t#9gMJmo
#>i3SK8FeQnM^U#EK!J$]mFY2q<$,:!71H+!al!>!%^fQck)\m,(?/B0>;\dB:jSd
QiW]X@?:U?ckStL%W)<\n;NUTo1H534i^V,3p3#So_cN1+4U2gAGW.H0,UpND_EW0
n._KmGR%Z3N@#Qoqk*od7sT[##m0@n\),Oq`uK/Z$7gY)";k$d'S%G+_I\71iH^D$
[BC0m"`R6maWs6tJ,m!c\dC*1B38Sr'pKO3mC/]fTD<&,@JAT%YPXH4FI@Ku:@Q<C
S1->Q:%Qp<Y\7(bP4Ds0!jJ%@n%%VQ&OC=7Dd-14lR3C_>\?ogqolDs]uQ3"F27QV
5F5^t.3.PPJ%An_;09ADV)W./&^UbrAPjE3'S,9cL&^_(479'?fGF(%82%<bA!*?O
ofSM]:<\^fX`_d,TW3:e!Gn(*"+OA%^hSUd!$)!rXABL"LQt+%nsHdBhgG$-MJ,)4
!E_1]BNJd2-IjjPDD&Zu@P.?=Vk;P^$o8Y!(oEZoYQ.,!Q@N%#Ap/lrV@fJa4@Y=u
.B3d#l%B^FW'Jhs1-]'[';h`#(P.!J(BdPXc28M@QcPRP^dsl,iRV:Y?-SG&#PehE
DR\GF$K/$K^`1nKZu;2HErnP!9/!uc#%5j6EGoSYo@'?2<7:i+U]XFlZWS%E#\_/_
5lfgW^c#q7,61@:#204TcdUT`YH?D%19b'dn<4[fG+)M]TPr#P%)=WYd83't`"RH4
&V*U!4SRWP2(06dFlSH?VO%WkOi[SfaNm2:;emA'Dg\)OK*0rn:R?u*>ojh;/f.%X
D[&W_&gmf4/Yc&A==hbm0BX.L%m0,39t0j?CBqVhrq3I;1&n):?:pFS\.$.c5D&V_
/Dco:E1j4VZnfa<%;OH!24kBg/6Y#62pd"1qOl@>0Xq=1bb1ooaSN0!Z5Su/^d6/3
-VR_^$i!#3M@@9u%iR"+WD$-U]G^gNiC?'u04qk1@$b/Bg"H\;@F!9i6$WIbkanN[
G^epJ")E$^4d_BN(e]KKOj6*P$\Utge)HV]mkA+iHg\El1L['SI/)ZU'pulPb^M"e
!)cu1a+oHtQg6aei/-V%pd&RI!QuqN;aPrdLH/[hp!n?ss&1[,9H%K<!4Gc%)?JJp
DRi4%/6YK]baPuF=CHkc1HmWaFR-'<7PrKb51a+fD:,JR1c41\\R)Z#+omOd!rP(=
N&,512$1!m1eWICiILPU+oL,:cRE5"bGd?/0V8&!o`k`5d@W$-a2h/FMdu`Fr@Slm
U4h'#$MHLa@!T6?^RTe_ZNY^49i>Fd+%8YeCJpSe"H67imo`Cq3)J-f>+&p/#3CDM
Zff!b@HuE[Ie)HEL8Lr8HRuA.G77.C#S(s?0<@pB!A#FJ3"\tK70[-u+4tsHKL:M:
q+2''=<chVUHF'DFAGb>ptJ\26G/*_=JPp4;cN0>m2?ngH0:a-k]TZVm97*\#TuL8
a/UflX-?Zi?icJt)=m9"Br.)0!bg"R-WLV]BlgBgZjGV$1M=Gmat)l-OC-!u$=LtP
YC2B1/:OY,1Cr=jf7Zj*?niNK)^BlW5]=>3hF*3H;Slt3TFmQ-f:sMi9ABN="V!FT
dX5lIJH-Er^`,oO(B<m_:8pnme&TtU('775E<*`CEU"&EFJD'+/rgf"/f2Rt,!G3]
\VLt5Elhi0^K@/f>/N(f1J^G[0qYAb#8ZoQrl_t3UguZnB`:psTn\h=)3r<=hD;*c
pC=)U*2mTnX\?$(K+&mrqQI;N$qpO)%WmmfBI1iljY;m/dc_AS#J^u1M!/t1d%R"H
7q2Q2nc6,G4[jr@TLOFlI1N<0\s`Z(J0W3-UZp0,^^lY7Y\0MLQC@="If&MYrJ2\Y
d/1ud/Dq4+TER.o;?._j0.V00o#N&%DI7p>5bUpKH'!dc(Ea(H"a-U62$0ut/1D[R
J\#"gYhV#S_TrZ)qIZHF(C=gX;6V':qI-W1SmtoRIrcLdkF4E&ZMqrBiS)qc='f#m
K:YhFn8[_(%WnI1>qV/"V)J(DMo[Leqbo*[5sLWG*95I)hK\'p]"*!\1J*^69WrMB
"CPS`m59#(>A^du1>-X`!\iAU*#BK2J8=4g)3r<=K$?&`&-^d%$jWf$7k9e)et?m]
=$g0`dbJ_gf%r,4oclHC9th17-iXfr]n!ZQq4Bb>>?[<,k-pd<Y>+=:iL/:#1[2_'
/-(V7EeKja"ePk#'%"^ud60p@4nR)g=q>!Y/XR-$O"S3FntlC<!L@CL)g3/TH'8a"
!A"6V0^gkS!"89H,(LfKKO0*"<K5?qKO5!n5i$rc,60@uM8$HIf*HVdRRc<YCDu7r
J8NfM7K=5(1?pLoA).9lQuOogE1KOV#h/V"?`l=4W6*YM#r2C4OG<caPmLmZl.0'W
SS%WV-90Asq6Z"@Ga;cYTH!joEcI$hFh.9eD8Zp9>c^*Tk6IP5+f9JcF0b"ImqfG?
%Qc<\iSMNMO9M1#SUC6Wdk]Uu/dBN;Cu+82L'(H#UHJ]edF.*l.,)3`\(jj`Y,o.m
MU=W#e7'pmrqPNSFshcH1ZqamE(lVja&+ek_M^5oaj\@^PqTSA_.3\Qd4'D4aX;4?
!BcX0j^ARpFN5DGke6JC!)u@h@h2=m^<;1c.1Fp+UIP!BeV2="o`3c$'up!;\sPkp
!2c3"o7=="8q8&Y"'FJ3ARHQq4?#&qb[D[=;;!^9e>Q4VZ[SVQF$KPdg(m#DnaiqA
f3D7L0O#H-W<?OZ=EUDjb/CJ$@\Q@KMj=l;@HL2XBOjmui<2#R`DkCaSs<*'3gmFg
;>]^*fik>5n-^l&UY!;1lALN1/DA;tM1Ah^cnIpCe)j#J,Qa;U:t*AjX1)@7bC9qn
I+2"`W=[)2@c`kV*YNm`HHLmp-JnAl;?'ktr3r$qn;WK-IrM&"rTS?BN%B+^3&kr`
BSNGe_")B*O2XCj`6VjH)qRLa9/co)=mQm_M"#o7FP,Y2-H6$jFrs8S9QjkW`I"8s
*(fT:jQ!9&dE3`825hD^=HnSlMOh7_A)^t0%4epS[oL1G/)SJgj?Zc;m+pe3$PrdM
1mYf(!uQ:!7Yl8G!(taNccSjbhA7!Q,j(ZY@A/@VE`+sibVM+[YEa[<#hh^@D/$b]
ZfkjFU1O)KWsc$V6(G#=^`U@W4]9\sP"n7k!"/_/!+"#T27,VDpmM7l8I#Zmcg73H
hPoFrFNf'a3tu`R1oR4t+1?"q!=[BV=2kUJ/7l^L1me9g<*RQG'B+L\-NA'4FIq*?
4l9ACTKYPU#@e@,&Jha?FFnp<J%bRG]Du4-o/s#'g$7T6F#8F?]C3I<9?*]Ym=Mj7
"Yt>/rqbsH3C7S@/[hTO#dG*Xob;iF-;E(,Ac\t:WNl[7/-F8W;]!c2:N+oE<FnK6
@?!KmW[5,tq/:Zk=<H/@j]=qZ#J/HX/f-`N3Dh,U>qYiC>V)<GGk\28A>gjlH.PR&
J?7p`bBmCgmQl9B8`!1'].@](FO<P2%,OYDIDGjRkqCV-.2Bs"hH']uobQ$*1'[!q
GWFPlrW36o@DaF;3RTZnd'Qg(3pWj\?@M_3+KPE+Znap("[OsXFitEb:_:lPOI+b6
q2-fI$bdrho_:jTN6!jAa):I%\jRd@rD12LMUdO@SS6H'R!WRpRr*4.pV74:)mZAW
&-*OM:q+Xj!?^9gB:]D2AqC$>](_,.CEPkA01c"RK)id*HUM'U"Pa-JnFaBfrXR$t
RarUS1^GcF&mT+kFV;Wb2i./jM"\78s1+Eg'id^F#ga"^A:nRIMmDt[RY:)>,%uUB
fRmude8kH]In;na+:C-)pW?s!Q;(]NJj^9Tiu:2(_GBF0I\E,2@q.\SDMb8l_1?Lt
Vp!'!4m$d)%$+XG[OrBTSlg4$qb,>Kb8BZu5:VheZ=RE'o[#sX"Q?F4GO(UNT3&(^
7sbTYnrc)N";:pcS1$'&NGK0t8:C"CIoh'oQ+\(<0;,$S#SQD`LrQ<o*d.NfbdOMU
<cRAql5]!s%S-Sq+Qh<;cUa^bhIolZ<X]e[eg\1RWCR:fj@<KT'Q\5aRqnGjTICBG
I+f:(7SG/tcOnW+hU"/?i,Z(3VTCE8fdYY^l6<dK?3N&LDQhDN^8n8ZZtBB?R.CJ9
IgZnG3_6W]+H]?M3:I.ZTS&YROF<@F6n8]Z&1339JIW#n4N2-BX_r:^>KjOU#$,a.
T'@<Z*=eTgqWU:t*ehci]1fWR^!j9\/MR6`p/OeV<=:HleO).$OWo?+<;Xr</#H-X
%=n^a9]#pR=A6%o2<SgU2c.!YI+hr`mJY^FrTR*6PQNNSL[q5lV+>c%*/f?A:#*d@
\0dKs3md+kc(dE(@+3t#_hq$Z6sU055UD4N83e2Vq4.6Z"kc7@5q_o))3@*Kl0V1c
4+Jnp;cNq#\9(Mh%eLMA`+M)$0F,#XkcL.^>D&n5k"%t/"%tIc3uunU"K5.t(+Ve#
G'&1E^6J\06%"7MP5hu3!M<.lA6=n*p\sOL%eAa^_?$!]c*=NEG)BXDO=c!7_uj_V
O9*R*eNDQL!7q!Fp4WjZXb<;*K=1-Ylfn^^3?tm8'(!_8S,RO1>Kj+I#$,a.T'@;7
%QF[tLBB`4p/bUJJ+crnqU7D/S-.U15ZRDh:BT6.hKVBiLYr;`m'4S85j,8YhAQkf
pu(Yh7is1I4m]Djg>]gKfOD9h26_s2pJg=+F20di3#qG`[(lIkqm4'6e"=W?i#LrE
#HF4_HQ'\cYn`m5,-G?Hgb(U;/`p;<"08qR:N[.,#FkmK_Z?B*ql?p65PqKGrFqc(
c@PD)TW39Z6ipJ#2d>^k?B#E'"gS!iY63FA)e4o/)H^KA*'$NVUD"cJ9)@<"rheGX
m'+A;62!UHZKSa>HKCDnJo&pW[bZ,][dG6_9sV77DPtC<6a@SSh<f^uj<f5feuHUu
;ta\&S_F0L"7]e=Xtn/_q;j8ZWS><mIbDJ:!uA#Eass7B"^,13FUkdqJO,l'>N+%%
aZG=Wl#O%UUQ_6-^@eUHl#q8>[5K6GOgFE:1$>'J()<Otn]<uX62$Gm(c1t]=?#)c
qs?]CSC_s#gSXP@Vk+7$O(p7.gWmmSi^*:7&"@IJBeA-OS-+a1:t7\^dfB+#LE@!B
?[Qj<kFHh6B:jU<iQ6H8]b^YRr6afsD4%j_3H5%g0I&TZC1&>VNeg%(K`Nlap=el)
Y0B)]p"*Omem*8j"gLI;*Le=DFDEQe[\"a'=uU0]Xg\cC2_\^UfB]TO0$H3)>aCWM
V&tMH$`ITCBE[mTqsB`lK:lLXJH`pjrSRY>5.R)>T:ZhZ+nuXXmU\1pNNgU?VsIEA
&16]<)JcEO<0X:@#?p9*T['Ge1MVTu0PLFLEj9rnPN]cnm^d0nn%A5nnR%0PSm:?)
q1p8U#bskKdbQsmhgYGG78O572V;Di5Qon;2VCLE/L(;o9KnWJjH<1$48-2ENZ7Du
mll`b:HCdAM+PTo0__dT-:.[aleTZCd"hdhc(ea.>7!lR,G.4#q9P=RACW?U6Y`#i
G1!K]&8eI3/$"hgn"W2RPqSlfe$4);+bs%NRf\PC9`.a3CKF\WX+cD7M?4'Y/Gc`"
l`g!<G2$k2J8.4.PZ+=C.iN!\=*_L+649'ErSi_gC*!tEV0PK(C*!]@elEjF1.L^K
!3>k/rqbr#L)FTZZ8u8pSmQFH[).A[SPNJKd7DDAB`719Yre^Z[&,=2(gd>P9.R+l
(Jd6jj=%fFb7X'Y+_;eJ"Gk'5Y.7$*M<7e/??!^aHHnU]D#Y+O#Y3QS0$Z]]r-DWa
RYR+RMu7Sdbr;i&bJJ03la8.!agEriE"8+PTW3:EB/Qo,CC&_FLtDdH26`(MeGT!^
<^rO]EieGOqsCjm,DfbbAhu*Tr,NWm]^a!f];fV]X095Ud!5,R_W8GcK]\LNZ)4.B
HEI&(O$=,\br2&[11=HCbr!lXBp,STZ`;4*Vg6-7j+J(@#`Mid1$Gr+29M-?I%:'e
^%BaWf3WggG$P/]o0rMdF.afh%,uZg&q`YUk!A9.Q]'Z;S6,l%A]+fkh2DQH9J51D
dnO9$<EBX>f;0Bf/<"23F]R<2N@cX#).sq;3*^`8HgS61r:A78/'^)gq9<:o_e<_g
7QU.b1W,57m[.G&N&/`rQ=#)de\H4a5QCOTi*P7ndd>mH2u/;Oi,]B-237G^JAq/D
4dO_+Qp7#;iG8Y$0B2NB+!8cfisZ0s`fpgZWu>(T1o4tV?rBA1COcs[.$n4_=kID_
NGA,r^4+U4=6WgkI.>1nGJ<Yh2.slj'lYI&gOO"`Br@N!^6MCMD#7cB.L:QA[b4-p
K.']";&.I:O")YZ@>,FsW1!9eD@Fme*O7H#63WQbHra1P,,0)G\`]Q!$B*RI5,*8Y
I<Vg<klLSkN4b5Pbl@Y1Ir"lXG7\rhc9#r(qWO^)<1gUsoiO5]<E=#)[.JRQjd$:[
Ea*kG0!Nat4nm_FhKnK>"eh6"^\%RX-GN2)Z%VQ&$D2;aa91(,ne;+,">TgZIJ)-5
**@Rcf/_1f#6o03D21n3jdnd':R@!qOc-j<ZAZldp"!>#XL-DJ_ZI%jFI$3Ufc^@h
Y.O+"F5RKdgb;u^q;o$!)^`b@]A.o9rBp91`CuYC+oG[<H\(>\/-TL/I)#af"FOc`
0R%OIP]<A%H*g8agM4;V<6YlP1*M,)JHqo_<hoSL8kju"479U,J%X4qp"EmBD=opd
4b's:+s8Or`[cpBAs>kbbuQNP_=Y/T,^TkgR>c7saX"'"=MRe2l9"FD,HeH*>'^W6
gng<?.Z-H+`/FnL@7hbr-iWn]5E:q'5'`Z;_?luf`@.B<$D>j1-_>RWQHA_ji.IK/
N<fd&51sJ17I_g`1ASs0DnIf"1<Cg3Z,[na5)Ao1o8%pq[7bnW,ON?YkH)#8;Y/i#
`T09bGI=O%>SluS!NoV'"Cd/gb2Y\_lk9Q4`JGq1-jl&38f3!Om'G$Xh07biiC?/t
OF)lui.6FTU.^qUAh#*b#uQ)8UB#>Za)Tsh\=#J7S2VVB!p'erM2'YXrRX'V2@$fV
T=3QP^Tf3tFK7W3/e3V@`3j6LH00tU2fb>VeZK35".496b/g%`Mm'.XM^C;;c4;u"
+AEZF>"e&790dA/V,7pq;Ct$paI<`^NP*am$h%e15B[MFiBUE7-lSaNa;S"g1q%E6
H[K/&.9?S]7+"]Y5%<*90AQU3=`JH^>=f?c0#[Uk_BMX2&l#$N"jqK_g$:Qu-<[hY
Pbe9nV$0h;JVea8Puk,R,XI!'bQ/b`U4)Nc]Ds4u!0@=3WW@"jUKI,E2H9;+s2fZn
?u;(9F#"mI!0<lQMspj'/*9'B5@=33MOCRJA'l"2Vk8EAbIm>]$Yt"fcp\*,Uj`;Z
8rl49\>JlTZKDfoXesJNSYTWmqU`;\+^3IFC<?PCJHm55-#.Dd^*3R39HFPFr\GWu
.hl>3=Wr`u@CIN^FUkdtJSrc2D)K[YC5E&KkYIP'UV!>ZjWa4CAtF;1pr!hAkQ?#A
^n,l;W@HZASL65M%m0,39i'Y:n>!s(QE`XQpuBD%rT[IPHT3GUYdPC06Ggi):lb]Y
c(dE0?mT9^rdjE%bC1JIef,s<?SamTIV7tjLtQMW;p?IEIe(T.Wf`S6?A;^c3^M!=
U\II$GMdgM5A3(9JXGe9WY.N.9h-.;A/a3Enn7WXq^q:<)G/4+&"o,-['`BmJ2Di`
=oOU[3ls#?0.Ws]@:`DcFVW+%ZI"KWFu6p%`'P%0jgCW`C]SlP"AC!m!&IDh^A2B*
D/C2?`0Vg#CZZV@]\nAL7^VOTW!L0OFFmms.Bq"ufOj\V]k%0ZJ.*NgeL"LGrp(QF
F+A8Ka/M9_d#J$H\N"o:oWqdjb:0S];;?D2IuI,(=FqnUG160q.L+7_/is`rg;1U\
++>&<lT`)Vm;IJ9F,cA-!%YdkR\/b`EXpUZ5ZRDhAWkR^e;BR"?=!l@ot%nZf;p&U
=2UDgd<)(U/0]a,OmP2$%mKc]R`rp'BaTe!8!l'<lA-mkpfZ4K#@,-8'Yk>eQo"oC
A-V+WG3u]hlFjVUBmC,S!PF@F=-\:AH7FK&oR?<pZHN(p!R3H,r4_hDn:etAF\OaD
<"Yd,7,gk?H$8%ikKIKN2CX/6E/b0FSld;qGiOc&I`hN9b5:-.Ii-/Va%f9WNDF7&
@Kbq[;be4XP1p3l$s&9H7n>S&a!rYCYj`"6_E0..^i29K39&uJ*usK6J%Al)4]_D^
/kW>oSJNR@;,*A8T#CDmBr7;m"EZ-k_\C531h2p[n]a#MXC^k-dnXWN./p]EN`B-m
+\sg=#105H"CNMuUR!5*YA%$%Fq+r>5ZRDhAWkR^<"G5%EX`"A(iN(ffR>(F5uT+-
e_Gh&aNtc1K(\0n8nm_]`>2ZOI@,q5e),\H:=<aDD&-'b;QC1h@/+-&POtjT/7hCL
-S6E*Lph6UBr?sbhKpoBC=b/':C3X/g'"orobMUYbaL6e-=%f#`YVs++h^=*0nnc$
"E2@dCDFWsDJo%KE0!9&hkq&$$#3/'^AHaTAj5ts9405D6^-A#*ilm]^rh,1atkm@
:<nFLE.Is0+/f+r5WAPgj^S85`BX:Z%iIB^>a&QQ3`iPA:@*o`.[#^(^+o\H"W9RI
[FJ;NZg7Jj$c'8j'p/W1dWZ(.Br"]2@'RH*s&%A@oR9"GC^sE%O&dT1X[0(>e9ZCc
TgtSN0+T`-]V*m";g-F>44qGakgOa>0+n:]9j!.Y,-#pJ"mRPJ528!m:B3Tl"a<L7
B#ZpQ*-9X'26.A*m^CkfqV7GU9/PW&_$;(3g492PI3=Z.CM=d0B&T2=\aZAT4rWCN
&XmJ&OXS;:<;XY,$@nHZ.bt<5"KN[7<6B+\:mL]n,=-/WQo?1so^oUD:Dn[O)\,(Y
no@om+$0^2k!1lge!:s92mge[DY0jM`PI[pkl@g5KUBQ8H!5OYV:Abm!b<L)dIuQh
<CX8G:8'SU#f%)IKDu/`!%6qp4UtFKO7k,T/H_SY3[To(\t#WTHX%9flZLWH][ffk
!".+;VBCVY^qKL!>Kpm_?_&BI'(XG)XY(rF9NC$TdJKS$rTR*F->37[aTK%011(]Q
`+Pr6ZIOtI@D$Uk>!Djh!E!M?e%eQMOH>6>#_5RD6MLT_?nn4+J']F$4JMYrCfqF8
0.\"'Rr?"d,t?Y-4OnJA&$4<N\R?=&psejsQk%<j=SfjU$,MH/D\7t'!6[to!noSE
0BsENCP;kLHTk4'_1?LrVp!&qOGipa6ko\;V%-ul[2uZ#G[Fl6>IMGu,i2CSULCDs
GRq\9NC@lD`H;sl\M$`I!;=PcYLL/T&WlVYqRL[?Wd1s,a_D9"(-i?g+!qh@T>@/#
S[,?15*W>mkVccJ?N;YT:]YHMSOB8\")$<<<HH0'2,)eU^bhc;V#t$Y\)fZ`^`Sjo
FP(>_F100kN$9YMKr!+.JeG>]Jlt0L4:f:/*uE48Qsg1.O,jL.ae,s<LNYuYRh.HE
]$U]pWK='s#,hO+R/J.4!5b,b!m#4i<=;C4#i't+O9m9%s2I"3U%M2Ep!iN1UQ3d2
j)[VXd$,:LE_;4*q@KuFo@;)M0BWj/oMAt!blV##P?3$9=NKZ^AU0.iYQVj1aJXq/
oucuDc@L9]YVBK<O'`hd*9^FQ\m-4"+8\nf(6*PH\<no4kO[5fMo<Z?SND'D@Bhdf
P`;juVSp-^i2UG.HPb_3p`EV1/\LSiWZ\V5l#./aAMJMZ8LKK>J,F;TeW67'6T@om
4Sf4RQGSANo"qSA#acTT=nN,`Qgc,I\fb1N+MMq`!,R`]CV<pZYK9GKVH<EbKlr?m
7-hm2nqFYc/!KJnb:a+s74-';aL\8&/:jFFBK^tJ@,8J#^hODiCQL,ZJjfPFU?N*g
=LG7)hg[kH^^:-$K7Kt*q;VDm`$\"B(P!>j&-WY,[HmVjfnLj[O:D>&_j4MERD7O@
kO:hAD%NggfP\=g3mu#hc8eD<B'`A2`9-HB*dVK2s5LKLQ&[]N$QZJl(`W)2Lh5-C
BQuK5e)d=I`Va);$G"7T"7H[#Fu.+\!k>-!DBTDW@=ee4aBVM:At3k\+H,PO/CZLZ
XQB)fNV<ee7%%Z[A*:W=%TG<HNYhcnbVRT/T1(S(6+5dO0uO*/N>7]u<&Lm0BhY-6
Jq/p_%:R3j<t+)`P'K+Y[gWn^6\2m`/2PnX3"_(&+@3&[6lQQ/\ZMUINg<OrTPi8p
4Ffk>"8%X:o#Ms9cAc`9lct'9*:Wd2+cAfh#4Kn']?B;Fo/uDp>\p8pGlT@t;aF*4
K*4B>$[eEmg[k&%#HF4_HQ'[TYlR\?<^4Zk-\]8!!4It@D'r@AYhEt[+5b/^VjQTL
M$Oq6>%jTPVSB\L.KQB_p"*Om`8imKo\kgMi:PJo&)q480"^JU+Jq=CX/Ci,9i.U5
Q#.h!Qr=7C(U/dkK*7DGibKRQA1NHRYq?s9<^^B`[Fa!KKmi^O[uu'M&EeSiVu8IW
]K`Ic:R@!ao<a^%Yu*$ug.K^kc1Zc3r'9.>d(oYG=230P?^+1r'WP"bIbd!qWgZG)
'#7rp/<8k-.Z@u>LbPmJjA[>6[Unae-H&>X%@%C(imKt)'6ld<"@rfc'4_"oH^G$-
=6YV,[-ZtUMaEdcpG0i3]P>T)D%qJ2"o*7)S6pN#=gaCe]*@d7$F5qJ/h0u7s#LC>
bCQYrol/[EpK,65n'>bDQnQG?@\+g`kFIiq`ANZI^%9N2_pqgq>t^:CraEnpQW,o9
K+9pjFM`("<gb'%'aLb-7sbTY9&Lc`D8#57X+E<_(Nu1!!`pI1fdo-'IItqPe)rp!
Krf#>Z)WB*<ondoF20fo*9\UWpjCdcSLKWZrRkQVktg=ZE"6u^"'*U@4Tf'ub_-;!
6s:VJc"X&C->^':7cC>ESl.@2M9r8JhL"_)+AlR"6t@<Y:SS'E^_V!iWe"/T\u.Ro
S-.&f_;TpjVu>/thOjbsTDg[m!Tu`B3De6gg+r`[r*;&=PH?^,UI8UWr?B-/X/r$m
=><aiCr$,<E7jRY[[;DA%BSR;4k2RN*,lAr%L7AFmB=7trp6ifoVZ[=3![%@JZ@k[
ScQ&E$_Mh;8IaHCJ0r(s(0bUKd9@X,VHiE1EE*+A1Td^T<8$Rnr:?Q\XBX>q'2KUF
ST`_uGrg55^eS]m_q$k"g5Kmc(L8p]&)2!6D:b9Jd75:45Q:26g1R]M?')aClaDA#
bNX1VZ4F$S23bl?MCYh8htkp51pC#,%Ejd]Kn1h7Lq6-m$FU<rP!+I#5"WNhrU5C*
a(rfrlPujC?kDJLg;=E95sP+AbJi$;nCWt`BkuCuK?lUEXHOuDNZ6)/U@@&[`uV06
b1udf$/>=8#>=t4G#Ke5id)`NM'kUE$DSfu8an*l;_uWOK4XZ3!T?:Do4Uo$=R3j`
hKU8MGi=>WT3)0Nn?TRS<a4*2YZq:g:-J:"G"^<!Y(80:<E0.%\FeWK*AqSrDIWbk
,Ob\sXV#ocZIR/+/$'<'2n"O@`+uNdVLhpYFW$[%GsD2$'#:27E-81/6m!fQn69hE
V,_p5MdHlDA0#^3+f/2E(EIS:hL"^nGue*_V'1`s6tG.sf3Q:>kFJMlMA6=\AUcfD
`#0-jRB_@%"%"%:&L&j]rilTW@fKd.XIWgX.I8tmFUkq-A=nj4I[6$I(L%i[@oG"W
/Hmj!IZ4/0._!hg*1+c9(A!Yo`ufeY@..O\]CU]g4Q;/A_?LrqTMbVGfjkaZ[sW^1
!]g?Oq:p&;4Xr8NRVOP#;C"?/\n'cDs8D]\kjAi07fVir%TG<Hp,%:WG(9))-fN2u
Y>d4!*gUJMkF6BRICVT&N&*R'Yq`81hl6l]"\n5p&O\cM_`I\]Zg6c0Bk78Y[Sj[7
p=n'WXr\fY*dHTDh3YM*L>nbAe;ZED(j=YN2\emN"A9\Oq[eVb8lf][p4b0,!0I9Z
Z>F^qeDs&V>t"J9cThI-H79A4:H\/8h.A(cH>gOnk$aB@(9&%6h`mD7BZhKHpu-2`
br:Dt`Yk\?f+/(T"+rA$%SADKH[iV3Ci1MZD7Q%B&eK<0-'s9fAsoJ=J1ZqBGMdhX
^&oPA-^n_C+TN8cUZIhL?FS*dX#W#I9.dQ9b$s5H!M[YJJFDNZ5H[^bDRnkN]0KmY
(/.2Cfnk[-Wp9/u0@qs2TE"UD#HF4_7g+@MY%36C/P,XMR#.L)")H\kk-q@A<D@6i
<skBSJ70%?V,fEh<VTaAmKkp]nuJt.)Mn*H?i'WbYM]-_F#C2`%uU^?m'0(Jb#(YL
'b34]J?\Xj3sSf?Ml7\I"oJEkq=%W<J49@\GegTeJQrCIo0Sg&Ya=<-^\LUce"MO<
>1>*!)aFlAb'Z5u?/+iHl#O'!806N+0l>mg(LJ.W38k"JoYC-rOTr6"^fl$M9@'r@
)Had(/j!184nm`Q24:u<U5LKdIK''*Fh>ia\)4n(BIT!r>\*'?-_IKPL0,HbZLcL;
0+E9q[9%VFd7<#_fGN0%^Qm'=U?SY1K\qoQ!6^CP`7@/qMenUobU<J"Xno-4PrsF9
'f%1b&Kmk/<<,[hpVce\$38L2nqca(P_hP\R:m;@e0qAO;-#`Q!2%J`Vjqd"'Jl=/
;6f.jM_,_5^%YjH/sCb>IJ;Qm7+.+T0,$;!CpQ+O<)Z4g_2MiH)IIjY[3u]:'JoM4
B$9_^%mQ"^E=g*b-OLuRVk/3LXWA'$;*^VJMZto=[FSMY"GGnP^odFNO"'M(dn\V_
YC,F^;>`8G#c(WA,/BpT017MuNoL'V(LMR[g9pj0!66K7Z16:=5HS4cbn=,QT0WUW
nnPc#VMh`HX)5%O9Ff"m1nJg;8Td6^s7t!)43A(F,B`B4peXGc.NCl]>^0D%Dj3uK
UF_(43GC_#rihj2It2u1m^V;O/=I"sLUN@99SbLVA6U^XPMhReErZ[Yb'Z5u^"r/U
l#Le)aMes%GX:F2n(_A,V!fW&reL1-,56r%;\\i\9G+"9eN%H`%6)M,o+&QciVr`C
O39/fX<-t>DBtZu9j;o)Pq>RWMe)!`T7%J$k"(`-7P]8fUjkC$eNA`6HR323l3;dH
3d<["l`Ri>^fJm9UC4>UXK]dW7K)6gs+muWVLV9>q'*T_:^1%f,ak<ki&pN_J,,"O
`8<>-),1f$)6Fg=,?e3?LrG<Q_;7BQm%^4K9PksR%MF98."R!0M_DfCTG2o;fjp;c
2rB!=m^M)&EVeptf.n+FBV?j._h^!sc[\MNjS!\sT)\j>a@Scc<5Ae]*6$u.e)1Bp
g!7R4<U8QN:s49GGp[ri0BWTog*!HZEJZ!-:lm4H62b.e2h5+[8@9H-rJhMh6%R]l
B:Tb<\O?XN`*>OTk*,kR4J0%]LHk^1!cQA0efk1N"6/Wpi'B.Eg<h>'Adnd%l+LY[
qM#r,M"AhH:LqZa!SD1j\L-aTkFO0EGof0/o90rla$i=^$Y%\gpP>7/OF')u0KEP$
BJ?'ms.6f+rTS@MjWa9$9J.OhOo&TVUjo[F!E^-,)=orX\7=[I/9*'prNaU!dru)g
fK09TH2f"HpSO1tA1-g`ZctC4RamJrQig@5UE^\m)N\h![jhUUgDK6'?N=>)>cbR=
,16%>hks5nicj$Pef'&ZJ,Jh:@uAi:U?b7n%D^Bln`eDW(pJhCJ,hV!M71.ic9"mt
m4%8sf>%;"q+0RS]af"6,iF6FMm%u/oC_2uIp))(6OWGN!&HI"cu$8JVY?kd(@<cD
5m-icBI1HWhLc#oG,6*YY)rqXPi,Me$j\\Q!(V4"q0htiB/M=B5#:['1*n][?:&GO
3BZR`Tacdlor&/3MQ]a=D7QC.-0q[%!&cG#giLflro(E+h^Q5QbChSI+?tbq:<il"
^j+ete/o[o7Xr!S*'_#>XT*c1nA#.V]#o&9$G^*O`gG(*:*4Z3@@GL=M(NDqqiS8m
$V;-);_"!%&h#Jl=_X+N<,$M?mSaTp231cb=fk!WJB>'9O0uGma%+mFeP3aX\0MX3
OLAUbMi"K&IN<I2WWWF.GnXZW_oMg["*+YU,6NsnmF"IKL'ADl)EsMno1M7QP?%/R
oSh/$jsP@R+>H6<,`5r'5hJ6,<<=ACM(r]W1e@475(j4t!&l42^snA+<MBpPfLA]A
\r2se-HAQ.WA4-aZctBq/oSDm`d3VE<[1:]`NRcd1V^EUH>A`f'6QOk?@-POStZlT
dqF[d)L9`l>$;u_!r1`6"FR93B`qhc8:Bt-Zf@:mKJ5&bjJOUXk5ZK04Rd@U%h<]V
5@#mR6''4.m!hNW.Rf3^RfRl,!jKH7`@l?4Os#IH7K@,t0?DEA\hM?Jl=sku='3tK
<$j]3VPFXWH^sr)"'*U@Pt>"ld+A>nmF5k;mJim.g(SXn0<DaYBe1H]\:dp:\l;7i
9sAmC9AsNTH"O/g"!oCH7=to=d*/&/p=XbN#.]\'mo7Pq!a%:OGlTqhS9(][/*3-V
0@dktRnLGF0*kKVcI!CoP>40<!n@-?.-AhMQp:og9XVElPuE3J&`L2kSih6BY6g[4
^qrUcTo03JAjC:J:YnJg?Om(4BWX#\DFAaMHdb\Jl*K;HbQ7eeJ2#;.dnDQ_!cJ54
PZ(<pf2uOB9U00U(i;BH9&QaDIQn]T%PSt!3;!L]]$[-&(UF+mj^RquK,##>a^c:(
=Fjns`A+$lM"5R@T;Ta8<e<'jr'akMPfs@JX"F_BUj:D-E:\XGi/d,>V:J;PBCOg<
]u-iL3De6g>+&p/#.4O[a2U9nhYnTHXZ^)Oq1@9P5lccJo3;,C4%8fBXOW0<Bd3V9
AeCWrr>ku(ZDk;K<>C$Q5d9g:.4d!Dr*k+lJVFH-6sC^Xj:Q_Ar?X-"i"Aa0TG+PH
rj/o6C*XWaSh*uA5'R2*=p;/+Z<KK4*t2(hg%`4Z>P!H85SUNUDrrkE]^mVVd.F(B
0-gCZoB&t_!*1:!C74b;/$$_>qi_-<S59$GK>$qWh<7Y$Mld$46'I42D7*A5Q6G"=
=+PK0`tFfMn5#77Mtp%8!1"akQiaJ"g1m&B]KZC`H-b/]]BrScanC@p4LeJ_?ci37
QH;nT$:sb%hnuGn3De6gl2\9ma%B!#=Ok3%VUAaoh/ru_Ykp,l4TG?NmBlFkb\;@R
Z62W<@M3sr&V+H@VOT[/Qp^g\XeE%?GEfecoX$(JM`ERDXI(SLhYQ;s:Kho;CS6pM
9L`]*&T$qTo4WT4cu@J-dnW!LP%qc,@<#Wd)!`N!V4TH^Q;,qGD<$-pc`I*];'SBO
4jB?*^]+)q.\nfP8uYJij5UP4\))Gs1qOh?0F&F*I%:%c"5W0:Q]%sHfKka[q0u>@
9SfZ\l(s_ICFtIX_1F\595%Y*47Bg\k;\Cq6(5>eTtsI&9Qh'GKDu]K2)t7n#HF4_
/!I'cTWt1bD5U-EDuU?5et0+8HiY?`470BmTZW/KhL"^n5Re:T.?aYTFMbtT2Dp2b
5#q\=d:#*N^^E7r[D=a]gI`hWYN3N$#?,-@b$h=hdu4p]QL!erbWTW(9digk)HD^6
B4e?7h\tH,9V*Ji4Au,<f`HoL\[$^aAte%^Q=;>%+#/Ga5Vn<)/cZYc,PVbBWMNm3
rhoOpn/Q^WAsm6&^=3r6+'>n<<>#>;=NI-gf]%Vr!Km`X7DE9:>=@iY=EjmDApZ/)
.C+QL('$e#c"06:at'Yp^0k"0j;`[Pr4i"do`k`5d@W$->qWS^DlEfR@\o?NTg:cm
Wfk>;hDHFWc%r-'0hQ\G_<`0m.Ggn'1rnsP*>.jA-9JJg_F;Q&RI^+JH%0h,Wd1s,
a_D9"#>C/;H`XpZ2(XL^1u7:%+:=d[KEkT[#QYnRA.AQqL6fV#MC-fDPs&:O?heUr
JWgR_"7QnjQuht8"l/&9$HOKP^dnTK!Xoa\aiX]>Rb$n_,E@TTTQ1M"#;F!t#bXa-
;1A'$>]7=KCA5UNWu(A7gT/hu$sPmgM_D195=!<Z$ttq=C'Y$%(<lAXp4Kmf-9M"N
YhG_$k`f;=.FV&i=cE(1GMei"/OGBG=8Z<:$UP<l=HsH'i)fWBl#5FSakFdR1B?!X
<10&E70'^Yp)K$FZL+1)KJ7t^n3^e@@414<*3_0`guo7YFK7W30"P;(jWDD;a/lVm
>5+=<\]FY,Y"87]_Y]\51K]4L8_tnX]=](gFO<O#8Ulkp]\i5(_/9SFY.JT6]tlH?
a\GOF!Q\BU3=Q/tWgZGm!5#&2@?\@:C)QST(j9'<-pYS'<`@E+GGE8cWPeS;Rs^n^
d1D&!?[b#^0<u5BQ"R51'&*BbqsOajNBt#5WO-np,To%%(,e\`W#u,7JnS;p^2qR[
-O>M;'$Nr5'L3R)HQ8oM@Yu;*5.,RTl=^adh]SBT+F^L["Ao_L?+Z[m&.N:aD/Kn-
)^Kr5rc6>VdoHLJ6+5'Q\W)P8d8C3P81D4gIZ**EN`ctZRLbuFDQ3Md'2Bshf.ROJ
#KFc23`mBimaH?c5@#m"mTZ$9NHo%pL*IK`KD,W-)e<kg.rr]a13\<V-4"'(2<5Y^
7C#k#q?r'"H>&Dm*-L@\@=b"0+urKM4R)pT)Z2cC#>n?nWu>)/AU@VX*0:o^+MO+,
p37%@Q-C!g>#Y[*U)hLS=)fDbOFiif#Os_^U:ID#aGuTA>X@2EJOMn-I&;O`%L4`K
<WV'U%)4tC*:Wd2^\ZX\Za]e[j^Ri[d:p/D9M=r^P6H(Eai,i(([.>;_t/h7%TG<H
3e2>QS,#!B26\iiqT5s%+Q;F7R/$mT)%L+.'ZBoN[Cd,382[F!?$BS9m;[kd:Jh.j
T72*JTL[tHb:X03,$U;.VpZ.+n,lJn+X"`lI+W;KiJ&;'ph6^O=%o<&)H_iVX9)MJ
aYOk(@9;XrN-Gj-Hog9!0_5;$T,Dg2ob3[Mc$)IOjC0ns.$C-7C"H[<mBGT-.u$eM
^,OLncSK`(:t7\n!7h0eAcu0mYVLq/8L5@<aL_eNAFJ:r!L/3&2lZpEU&nCoI_A'Y
9;*KE*.e="WgBh8XoYn@$_pm0elcXV+@3>KkNs<]&?11_[?:7N"PMc^85QL/cp7nZ
C]VB;oA>\N!M<.X?D#b`Z1hlomYm]P/f1#;H`,q61US%@::02im>im>2cGIokoUC7
230eKFT@p,=&_&]155R]F20fo*#LpNpjCe&SaQI0?iB4biuE"JFIrY8c(bbV*Pc8V
DcHli;lH<J#FknAJH=h^c_p`ll/&'2eXugtc2m)npGl(#4R)pt!GlB?<].*:L&-XI
^cC<m(dJT+I+hqumetgGrTR,<*,lC0T*&*<UCLZP^h-&S<<FaMW1Q$SS-.&f!T\dW
Vu>01hOjbsTDg[m!Tu`B3De6gl2]B9ChE<?26\iiqMB:/3T(ko5S!R:g0^E=rRkQV
ktg=ZE"6u^"'*U@%U^<mAk$]=""R<KT/[(G"3uGujFGRSrRL/hTDd<4r\Vn$k<Sc%
:t7\n!7h0eB(T+]YVLq/M0$Hmi#ES!%etG*?_-W`fjF^B:ZEF6%Wn<F<R%9K?ld$p
7W29/.oWC=3!YrUc@H#WJBt.le`kq_rRIP>1sQ-b5kd98eNE*secBT!oN!iR155R]
F20fo*#LpNpjCe&SaQI0?iB4biuE"JFIrY8c(bbV*Pc8VDcHli;lH<J#FknAJH=h^
c_p`ll/&'2eXugtc2m)npGl(#4R)pt!GlB?<].*:L&-XI^cC<m(dJT+I+hqumetgG
rTR,<*,lC0T*&*<UCLZP^h-&S<<FaMW1Q$SS-.&f!T\dWVu>01hOjbsTDg[m!Tu`B
3De6gl2]B9ChE<?26\iiqMB:/3T(ko5S!R:g0^E=rRkQVktg=ZE"6u^"'*U@%U^<m
Ak$]=""R<KT/[(G"3uGujFGRSrRL/hTDd<4r\Vn$k<Sc%:t7\n!7h0eB(T+]YVLq/
M0$Hmi#ES!%etG*?_-W`fjF^B:ZEF6%Wn<F<R%9K?ld$p7W29/.oWC=3!YrUc@H#W
JBt.le`kq_rRIP>1sQ-b5kd98eNE*secBT!oN!iR155R]F20fo*#LpNpjCe&SaQI0
?iB4biuE"JFIrY8c(bbV*Pc8VDcHli;lH<J#FknAJH=h^c_p`ll/&'2eXugtc2m)n
pGl(#4R)pt!GlB?<].*:L&-XI^cC<m(dJT+I+hqumetgGrTR,<*,lC0T*&*<UCLZP
^h-&S<<FaMW1Q$SS-.&f!T\dWVu>01hOjbsTDg[m!Tu`B3De6gl2]B9ChE<?26\ii
qMB:/3T(ko5S!R:g0^E=rRkQVktg=ZE"6u^"'*U@Pl]NW`Yg-l!JA]\o1ZC.Fe:81
eOVdbSpP?lkC<O/hr\epOBg@\nAr^3i#H\G3!\1#JBt.\o<&nuo`"3r?L]p6#Fkl@
M$$c&UQkl4l)'q&]^sE1iK&KdA!h#2WHt#"n%\mOps+)t';h=Dg@4gjDte?X]A9us
#$/4fmI`IES-.&f?K6R^VnLY+_eY>-kOA90G<6&""3uItk0_<Om,EpVY2Jus1X?KQ
0"YpqpWsq)g_"_`BdX(hpY9gc:UdadNN6f%2/5&X#QO_b5O2pNGiFR&OeHZi!PA-9
^\ob^pr>T/47'1=ptu,Mhl]*?J,]&3E;%stCL*EJ^3Q)^ZH6:M\(bc>HJfUSpdOu7
pV%GUR:V\Mg,e$5++<dDc@_)CKbn&TbW>'kFc618+8uiNr9$;ro!#>VhgG%GcL'PI
/$908qUW-m*-9>48c&>@HgcZL5Q80Y2Vr]=Kc+Nn0g,-Y;q__nn?oHJ/^-EUm,@]R
s*`OAdnMFIIlkl*DU#("ILIn/Et3<'5@#nM2q5Dj@q_^^`V0-8.nr4nXKtZ9!KH1"
s8.<G0CU$tassG+Q@Y4ac9(J'htY2M_H4MKe\XG7q!"]KL-PY$:\n4:eQ'M0f3K3l
rU56jjm`6;Im<kr=231pAsd"]>.Pf_c[j7$;0giqKT87mBP^H(dRu56jb9e65I?Q]
dUoC.#N,u^:6S?aEQ&Yoe@PYBJ,UfJ^\mZ1O1_F3#q)5sY-GtbSSlH'.t?'I;9CZq
Z!D/BXgd/eFmcs;hJLfrbr,s&Mm@jK%m&pI[b<d4RiZh4JN3W#djqWs%t3u+?]9a]
H>)+Y\(G/J-jqp&O@'N*cb9)04!ai?Vk'\rSp0%:R;4"bUB'@YIFK^=?1UmQPtCeW
n=]$QB7gXOLk#I%h_Sj>8S:$0Xnf=[XnP`b*9_Ko\m3I#]XdWOar"oVb=1GZo=lAr
pgO*C=2#;Y@Cbf#ATI;_s7f)Hn\c+$QbN*g-t'?b%-/^TGh65FNO-kf><Lho!t+X^
GlIO%8$U!k479Ug]]uMtikPKc0?"+9:'%[N>Q=QO^W,H/Im/b,+>V64L<kFNk0_=.
Yj]='Y%e3g5b*5ma^M$2<g#B7*rY4[^BqO@^:S-B??kF_0[2H'oNic_@Z)^?)/8(J
(c.P!UD]dZ;L7Q#LVge&mMg&YrUr(Yn5q$LE5;\o2!oYgpu@EjgMXVTm'YGOL#quJ
U.cRnJ5Z1)2np4WQsbNK1fYlH?#;dgS9$IY29X$X[@(%D'inE[aMLIZTp9>-2boZD
Elij/P?$RGDRi3V,V-jc?[mK+IJ)+uS$;"?>A@J$#XsCnFoM4"f1Q0Q_cBuY<Qc_@
4C!'_AJn3))Y-<4=eq@="#R<h5SS\Cb?o!F)Z5@4IQ6,1o?Dj="\tWK5W@lTc96lJ
C`MY.J%AlADE%UM/K'b\aQ6mRNTQ8+rjh*Q9@P`^jd0=,]r=[XhL5.SqQ@?_DS(UZ
-CQ?qn\uN919`H!etFg(HgS3CRbXa*>"W?\mtjL8KZ!ZPYHO6a!aNXP^\r#]<;Yd*
B=mQ>$Na^gJF7rH`iA=pb:hI&CDm)DAI_ZtNt*7)O"'&[dneR1$[K";!b-LO$VQt&
RrCH\EQ/l+)X^*Q%_s#Ih&nOFe0P+'Ydtcl]Wj.R:&N\jIMV%k&1&/pRTt.i'4-np
-m!d*_52GT6C%^_NZ8#es8F[8fSb+kTb[gu%;BUTi>jrk0X!"EC%4\7H)-JhSTipN
:!O`bd`cHH&[<6*k/:+^X-Sra@*tWB3TZLqL)Y#Dpq0u5ns=,1=R,_KZd7Vno?<sJ
g7imVXZ?r6F$?_/eQu,k#J/<T/f2^@hco=t(L-3dM_;Rh0!N+mEPVepCe=e6-5WX]
(28P;@!P81Br7;m\CkD'U4C^K$l$/lD6TCVX*0c@BNNC@k<K!Wb2"n8J8_QVpE-=,
3De6g=ufJHD/YEO<*+HVUBGat@e8H!5YIZt9cM;mR'uOZlVu(/lau/WeY\W=C@UPH
Z3"+.N-q+3[TT,9Y.5851*JB7Li5UsXGQXD9d@45d75:<ZKe<40j!%=P>1$aT6q8_
ohNb#GfH.aSlt[O^]4:1[!$bCjcrn^SOXZ>KUu+spdSqcB[d_iLd+>H`*%K%28/4S
?=*/AMW0,f'00pi)=it7k8S?PZ'sAHa>!K*b6EA!!4uoOj/JrJR]0Ik"f#0_W(H5_
M_,\Rm"g-]]_'WF[Cng$d>oIuC1%#;f6'D=o2\P&i9dUTNf$D&8uJ2"MRIZuaX<.6
MeQo<+.;KkmnZ+>e5<T".UZrQ>Aq1iMqVG0N)k-YI'UE_^A6o\\i=ifEQ?Uml+:5E
fd06e\VOrS@nM?tWMqqU9LU5@VX^IG:9+3M=du,**d^T$-OY94<"HbGI"1X<+%3@P
d;l<a.>tpIs!iH7F6=>WXNiqY,ou^ddD"2O\)m;?C,o[M<,JU@g=YCM2u;"bU<?!^
%8tktj*d`G7Bs)GKj*7>0u\"LKX`(RjaAe#67ghkQ&-Gt\=p0#IsD:WIs_4opZjiB
:n4/#elhNq%mEh]i$&=q&V+H_(RLYO2VKQXLS(rnJZ@k[aoO&S_$c_8HE"Sc=_#MG
05[``1>,hIoOi(-UM`2b$#227N.:ZH?hEsJK+I5KK:%/<RK-GqAsm6&"^T>3U,_:*
0o(]sJeH%-;o]b>$Eq,5MJ?T:>%jV>g1m\Q0u/f^g2Fb)'EnF/\%gI7^]BWK^m:6O
o&*_\[-b<VC)RI&&>2gN#&"sCp^f,j<0gTZ>iQGi/>6IA<BqmPHo7;8!IBh1+&HoJ
qZ'b!'A@Vcpgi<XZ.sBC%;@>]l:E=j,Qa@#M"fP3&']1>0umssf32rA4f?PTE\rE!
)Tp#X'&\[D/O0U!@tZ*qSJ"mM^A-]G$?Q9"r.j3QSrX(^.?f)Yq=oJ4n>@FHY4mn)
gC0^qQP,2de1Kgo[:K%tRn78/iJ0YqTe9Abc?L`]!5#`XeGV5)]ta'R$febWNa$^m
[g^'H=[bu@cVG.'^#kc!igtMb)%kpl%j-1'Ml6os_C+a`e,,kD4KTe;=Pm(WS/3uI
3REcbFLgUU0e`DAp*3Qi!r;o![Q*+m!6[GIs%iPq;^*7el/HTUa]SI\^?D;Ll?a2b
BPjAho#^O4=9N$R_##Fl[8-+1!1rd"/e,RKOqu-)3kEJ[b:HE:R!Dl1]Cegfe4gn/
37'"MqAc`RWLp5[X!Xdc++J[gm\/SAS8t2&fQGeO=1+'%Ag'!g9ND]T@C4]gd*T^N
Ie_lWlZK8G?L@iR>YdYA7&&8>'Yn0q:-J[Edn`31`rH_s5[P,RbA2[S;N:!<J,3(q
)mBJH8f5#ABZUXdKEmV6mUk11:]j[7^]!kPSM*Z4`OB'f./1&-^pC,To#b]28fjIl
\))Gs)XlSjq9ZA:?NJAS?j"Q9aN&TIOB9@jnL;lO='pA5<CHB=dbfGA)a.[eI+!V1
0/V7eSHY+>(e</<V"8'23=?q"-7f>Y=Zn59YUn41+n3D`:["oL!&cG#giLflrs[4R
A9M;_?l@SW(I.Dr-pOl%"7V\=;h&bZ)uXJ+bN33[`E5T),FO[\0eO84s5/,g/fo8q
JSJn21I.i</66K_5P'f^LE1Q*VXo7llOA+>T_I8dT>(3l5!p6G#Jdd1]d'@#`*=N`
,4B2I`At?HJZ@j0Q`TTE^MiRUG@1G(9oEc$"usenAV)u3",dJ)$=M6adOkifUY7-a
1DA+tJ>Fl)cC%r,9>gssHR3472PUP&funa\JAl^60ZTuCFq.nl>0?cLe]WlM112pb
"5HSA&8"<)kb^b9AfdBGgNJV1CJ(Zpo%[oO?[M/t4Z8Bq^:WgE9@M=%7N9B2Ql2BJ
Q,Oi>qXQq!b:b3Y7=<$QS,4pE:<D4'FZ"KbB)%UVcS=g_mT3bD206kB3#Z][9U"t>
.3]s/U@GG]\b=`mMf-e8!W:>i2i@<u#I#btnGK8HINnhc`RMs"(\uf$!SHS,HVX02
QW*',5bIOcl44B3g7Ku68,'X=`PIds&l_HYP>\X:.0,9%1B5\u%LiDAdTK\mMN23'
<DkTS/F>;E"0gq!`d<\DHQ6^A*\FG3-#4B2"uO$LJVAB*h.sc;1/c-71&ssrr0E>h
"u>FG\S+3E67`2Bj9Mnul@Go[VQ@Z9YdB&)N9u(-"(nP-\X$)qhFT)c<.T#"b"!<^
9i(^;m!.B4k:J2f_)Z?d0R1G@-YSu'ThXe(@uo14j,ZDg^AdupHCP%=<Zfe2\/3L]
)?:5q?]J9J.&%mc.hN!YSihPJ0+dWcoq&E+53:NUpY9h*h0CLY'/h:i79F!X>XU-/
!.*sZng7!)E`fRM2!23^q0\^q!UNN>h5&AJs"FI,p]-!3$\D-<!H33X:oC%iVhtI*
I%j=0k0uC$^gfQ'rP=%cqpXZdR!s7iQsJ>b"M'='&ou*))8@R%E38(9crib^\X:]A
j9$o0ol[D``^i_a",h;lC$P:Fg_RKM3"oj'Q:59F!TIZM[E!i!kL$S=>dBZ8AjFi"
*E`)D@OdOid%o6fH2uOa_i,5D#67%?ANl)I3)C[3'!-l0Xaj[!LR9XI"gG)6TbX>O
^mt5U!fHNAbu;<g";$1"O$)u(ju.f'(n^qHO9a$H8cTeY0D#8@jNdoE"/)$G[KBnH
biX=!!D7n"i;hM"ce&Yu;VlA/I_Gr&9;tnkS)2oF0g;WhS4FLsVJa]fC'%7[pUf>-
HiX'90`f5^JM&2FI.QK!j=LG;pb>]Z^%0>2nats(!0?q8o`k_*m8'(,U\im/i_U)#
?C(>\>U4oM?Chb4A%_?Oe+APO^:8,kaNMPMVBQ"uV&=gjM1:[$mqfW=o'Ts&Ds["_
P/S?UqTPlH^tM+<<btOuEM1j-[&b%0XC[n>d.F=B<\s*[XGH_q![=m1pQM6I,SF)e
&-cPeMI5rh;bWnJ#%6tHJ]nN<dodnB0)uJm^l.Eo7QBkc%eH/9h)(K!$@k*%MN#'3
r'^"u;n]gJIL-'e"?:$L\+0i+PqSV`R<0i1oOLa"btg$lPi*MB@.)e[J<bP-omVK3
UfpIo6c%M$52*qmI:;Nb\%0mB2T$mmgO@Dk4>0[F$"+XsQrp-V:5R':XSru4,=0R;
c'T'ka,KW>"Np![!jMG[1Ht;ZG3U%Pi%Z=Ornp%#qU=QckcMR(/k1!`1"echj^S4]
h^K4Jl=%.6PT26A5dn'1!Lo%P^d9BFQ=@@m+[8mAUbVp#qon>q:=)h8p,Gn!4R/*;
4oY3C>u_?8Af/Hs6%)EdWJN"s!^n_*@4RR"f3C,<ob#nIUA7,fc9Y8S!^34PU.eV?
cu`IL+j<s[h034sTX^$.,j*(5GaW&+^8LbN&ekR,(\/0CpXd1Z[@S=nVHg8=q*G-j
\[Nt?cbp/6k+P1-L6s763*MsT1o?M^A4j@U1ti*)Tq.:5Qibp!n71N#>KnEM4:uD?
++f8Q:Vk3BIePou"6^Yk%uG"+nTj4[!Zo\u[PC1]NDM;Be<H!sRNhc)0>1mbl>OD]
NLmBm5%Q4*'Du(5)dgsV$nS<jW;+0&c)d'6E^`2HB%c0u%fqiLo$$l((BMs1gB"O;
/V*Ch7ieGB^0&;r5Zcenb3CDWY\Y0\^X1IlFcHRnR#b0qE1e0Kl#P25@Zg"!M/olb
?XEte`F:D@:P?<(Y@6CB./a_G1;kdgVM>cO?i5u0%>tB7hQcYBZOFWY&VWod\0P+X
s#/2SWod0FXNg?a+ECL?YSo6SaT54Poas%t:r2E6',0V\,mXJYTYiT"N>d6\QtAWD
jl;h&,[LHjg-<A)pQGe0_f(WmNYWIe-urQ?+"!Tk_3qAVQli)_"`1?UqWcJ:6c&Bu
/L0q`0st"F/`?4R!%_t=bKIiHo:^;=,%iZ!6^\SL/<iGI0NA<>6?h:3Vh/:(0fq:C
%0B]6fQfqe#FUO-9$@ErFrAb,m\*s;0)uXAOp79ui\Jj$5-Uj-3Tlp$LDMBIN^Pon
44WhsI"WU(,KrX=#hsZB/pg($8\UYPPNCnmTNZ$jfdb$u"Uf)ZD2!HT.2ef`GcXLC
=g0UTPlKf=R]Lr82?R>]i7]@Z$P[9oWJBZp5=6M.NCW7^!jIW-I#T'K>2t(0p,QMj
U&>W%c<fKqVu+s)U<CM"fl-nAOX:mHh<?T]'YJ52UGBB9jVLsA]USFuADoHHre-g&
r<g*YHOedUjp;DWh@FlR+>;Y1Y='f@Ye4TKOOJp`I+`u*Qig@5UCLZNo6R'M<&Ln[
A/b?"@VX*I`@"Gp1Kd.>$1MLQ,&#"p%352$1h(,a9bWDMb=k=&RhpLsES1cT5]9hu
*B026J0f%`,D&llQYf/iQ7ktQrtj-kHg^O[E/r>EU34bN##f+G+.KC5d5*\uVmJ'5
kCC+U+A27tg2WORDPj!"@'eri,K^*jI)F>=A$OtA=Ut)`I+m7$mdJSNWBXZ@2E02l
/e41PA5q4Y@_EAjqZeiVGX!aR+omOJd)6Sngm$SG.auj9F.fOYoEu?\KfM-uPQRZ-
dGOu]hRsmd%Kle4mCeVa!Kd?_E8jCm"@<\#!K\C>gK!rUbI(p)4epEgmD[(9o6ELL
g.!/g()Fh("nE(Dj<`sYp@bqOiP3%<7%RhH/4>tep[Rc.%PE$prNVEr.O"B2iQ/@d
naQ%pXBuE,aJX*]!qDd2SpQlbj5THgrqu\Qf@SWqP8]QrBd<ZI)gV<^jDAJur;:qh
KD%84<96s\m$Z@mK0[u(U.J`%JUHBUjCR21QP)f;Qgbn\\>deA!LlkKN'gHfpie\_
k,%]/[;fp@4?FL-RJlYWH$T"dW';!#H&qaj!1`e+7t*&9V-SLM-m5,t@LgbLGRb8f
6b$:7EUe@\n*f_dX4WG^=O+7W`r\0&=??G2ip#\Vo%'W&)meWpJZ:i4JA'%9h[cb'
ep[eIHu4GIKK/N'7r]s4o((JAL\'F&^V7E+^R")r9n(nsjMS=L5;.GKp\REDf]p+r
hJXG1eH>@3nIb6Ymud>KT7?#u3s#/aSa@=IMru#DqQ(6I>eEfd+2A_==n-dt]\bU;
^=pZ3",_L*an^!rQ4$[R;$H=W(ehJQe\[afa.rtP+E2s`I!PnG"u[4B%0Xca#nRqW
TIQ!P@##55s1q\eXSsHr,67iK`Y+A/a,7pNUCkh!"mo*9^to6pnu)V5mjmXpq,]/L
J"$$T!<NCI-Qo&,'lri7/"U??J3\U8W][;3m2rs6H`UCQ6Vl.g#S8-*5sRX$JD@C;
na)(6.fojN'WB0L$J6eoa7;f%/Ze%YYU9GQ"Qg8W:ZmPoBbo]RP42(o!.e\_<I%OE
]?GcY]rDk!Zp5s-J,k-N"m",_Tf03EG]"d'L.Qp2YQ@gM;uo'sLt<MHe\YL&oQhfK
JA=,Go'&-=W#1A9<[_^8!.d9@<96s\m%.;+Kt18:X:%c"L]@GW]+U3$k6e\Cc4s-]
+[D^85ZJk*_"NiFcokD]XJ%"UE!-FXkTD"?G!PKJKm7dZeeJ2e;[QLc;$H<Nb@C@D
WYX1V&_N9I!<R<JaJX*tnMCXD4@scD5_-X*JZ:i4J6h;%m9Wd#CK_ho,=$dpPlgO@
Pu&FQ9KY6H.)R;q?s%u[4K<oP2T4niXD21G1O?_I+@'<S!Vpi-=B(5I4=_,R6%HbB
"fh-l!d;njkec,U(=n2:I7/ScJR&T'VfRPr4QhU"fao:Q?_Am0.U`.oDWi.B(=pir
1cPO>#]pW>:HK\Clp<fr@dAmOJLLc&nu)V5b2omU;H4*?q$?=YJ,k-\"Q\#licpoG
Gb-1n&g0GIR6Xan<PU6YT6@E<Kf(HDM%Ljqi(=%GoLc'ACaP_m$'\j2+>Bl^<?>/U
%NFDM#'O0Plh%>]!X&eQ-h.$145ZiW3$ZJa*<t>a#nUboE:7dD!S\kNgMPF@HFpF<
EWQB`'Y*m&4m&j>2_)kgrPdQN#nUbpE:7dD!S\qR=sZFa!!*-(#S8+DJ,k.0!<m9o
W9+?s+@(GW!<NB0&0O62NIV)=NN6(d&0O5g!!*-(#S8+DTNFG[>7@Ml!X&c?+@(GW
!<NB0&83;]J8O>H<<<:/&0O5g!!*-(#S8C":r!j!C5r8p!X&c?+@(GW!<NDX#Uj*8
\8%9/!<NB0&0O5g!!*-(M?O]u`LrYE5_&h8!X&c?+@(GWJMmQ:fJ]m9,sZt\!<NB0
&0O5g!.eU15<h@s^Vt&)NW9(]":,P]5_&h8!X&dn$RfE+8Ms%h!!*-(#S8+DJ,fTO
/Hccl/QB,LJ,fTO":,P]5_&h8!p'K5!C_moM0*]_nc/Xi!(fUS7'8jaJl#)B";Ch?
!!iQ)!$M>&DTfbg!!!#U!!!!8!!!"CDfTAA@q]:kFE9*FDes?4F##@mD/<b/9aZM,
&-_!ma;hum$SKB-l*e3q?l0OjaH%T6D/\;Sm@n^uhLc?qb[oep;ngGulfK(4X@5uo
7J7%mYgn:s)]\$?P*)&/^grC6NGGE/`=7U*+-8'c3>M<CoV\Kja1@\'"%eJtq\m:P
V&M.NMpMSY<l*b5\p/9n;hi;o$Mk@#RAQ1s=.breGm2-fUKdec)1V'*DZBb;s8N0$
:eLln'EA=;#QOi)+TQhs/Hcmp!!&&u!!!`6!!%4]Eb$hFBOu$l06Cl=D.PFSG\q9`
=l!uM2AEkIY]h43mom.GrrdHO>IN:g8R"#c[pIJq/[;!;K;=\J7=dV<J-"K1RfU.U
`GQ$!cdZCh*b$B@gS@QIki)Z_ckqT7o:<d[kE$c7lh6n8S:F8N32T.%CY\JDJ;T^@
\4HMRPOhAJlN&VGO[)5@eG#8bHZtK7s6MX+&fJh(OS/iBJpf9c@X_:[o2mn<IZ)KK
+o>l9j\X#J9Bun:=42"^l:p/Sf5l`U%hp^aDU5-g8.^#*S)G30a"-mo,6&C0X+m"G
1Z]TV2?l(MBW*Suj:PhY&sBsV7nW!q3P#tI+HQuadJ&%ekLGW3f@NJ[m'/G7-MjpO
Wsk/LVRC"!FDVit@F-'srG)BF]=;ing`ErVr\OVpZ(,OM`V.u!7R;_c5\8@%Hdiq@
)A_3!hqGmW6M7VQ)H7K)*W0F\D.71/b$ql5%u7jWaS)f'A[/q$n+_N4d'<'YPS%/*
m%F<]h257>>si4ggiL>Z@5-q&/,0<K2ca!o?\j,G/VhY$Rn/')/ekeq@Q?q7(e\*:
$(`m\:2lZDKf=bjjg*QXq@gUis/Sqg90/j;#XQA>Cl8$`PMu[hbj\m0]e?3`c[\,^
J@eck33Ga,[C?I"e?jJtbBJI9oF:T]\"DQlqVI4p-@UW*oP4knIiCY?#&es8rQ"B1
hu*9:T>/*\^]t9C:&$`o&I/in'mNDn3B>+[BZf2Xi]MkGZksK+LBUX8%eNlCcU:!"
6381;+gN?gPY%in!UhY4>D1<X[Lh'l]V":$n<?g+Us(isqe@Z<$B$*N&'bq;mP0B]
Y-Fb(4HC;"\`U0?AX"?rjs)'K%T?=L!E:/S5fdC-$tCfjV`8:Qe!U3^0Gm.C%*:N$
>,u@IF:[Oi02!*IR;XT6Vbb-j&srJ-]!RT?G<k/.M22nd]5Sp$mUQ`I@NnU@aBU":
Q7THGc@sJaM?jCG"EEk8H,u9eh>:)ZghAu!bM5QBJM19L'1f+1_<FCQ_0k\3N/Pou
I_d\u&r#6U'i#CkhBAmOo,u"^?b2k=A>T1ZHi&Ya+nl%84U^E+&r>9=ECjaRC$5.@
:![hL:4_;cp@,skq^F/WN4Ln@+JS:YhF,Wo$p444[YXCiD+f(@=b8kejW;6,nHd7]
idcIjmSC^u^DH<dqt]`%]hrHkNF,uB[@;R4c$b<Q3>5&;::Sku/uP%0A>?;@U\08V
4Hma!3")'.W69]gnJ)hm=U+&0R"cY*jd#.rK/r&aFO89-hl;;[nl)!AXc:?cfi/kT
Z"]Q&bGnj>7A=U8G;]t?C\PE+lA+I9!G2-l,`KQU&hO?FcDpCT,kT:j_P64$d8fW/
ZHurY<oj5^;#RU1"skM)hB5+@b#<#hb3m)%]e>cH[%!*?ob?#qAD/59/2s&OYm`FU
T^CkDkIS,oWC9U:@[BQ^q]U!^6tAq087C,cQ/$G_:qDMB]^O,+]hfL9\b*q-DF0L%
I4l@9T`9qUbS_3AaKlMV]?9s4=<IeRcK/4gdm/d"[mm^!k4k(%lhMW0jRee,A2KdL
=R9bT<+TG$`7]K)Yc?'(,^kt)=("W9lnO`U$9J\3^]\_`Nb3m2Z+)_igle^Q.pB]U
D71i<o*eYIMCI[6>aO&aN-T*6gU"3OeRYPV9%&\ph00g;%RW)I*$FOrFR-u&46-iO
)r7u*Q.!@JFhO'km5lV3INTKW2M5/^'OqBU9rh"UJ/88s\Fn;*G=ESK1tZ-Bl@<!m
.s5^ljTM,<QRdP2YH&$T\>G.djYK61qH:@.!o:FcQYQU;%/7FOIQ.V-Af0(rDE+d&
Xh_,__a1=]#fB\Q*&d`BYk_0$7:^Zg/B=@'k8CS,hS/4ISMr7ulC*,OVKn`tHZ370
lSgMWVY(.j]I/>QeaEMi,P.YcSFg!u@Ct*+%48Jj2!ie>;0uCa[A2#\15`qdDt;<Y
QPphP>#EWfGAHS8'\.fDYNU1W[8,(b%YE!!3t;HJX'!Q5YJ+)se\$qB!<<-"rrW6t
9*5;2!!WE/!!!!B!6^7/o*>?s!'1/]!$M=B!-`@%A1qG+@<-I204/a2Ci_7>BOPq'
0eR]fCbBa>Cic\?b=Vjk'L;DErt)IpRAh;Qc#hnH]5XNf4iHF,6^-:K2jNXbRfP$V
BqYoYH'!*m-1f+>*W(R^4U/ku;/c`UT^>+Iq"s@@lBX4u3`tc'JDqLj^8NY;k-*]b
b)`Le#@a)68F\=/iD*!#*I(9[#71.&_<?$agXsY7RkNTLS/'#&N4TL)m4m;B.NXrM
R^:OVJ90Aq1qeGF1i!UF*DpY?)6%*R8T>n!p^aUX]Hj->;qDe";`h=/3%\K`'9TLj
p#B`$M:'_ljmgjRM,_6$#_W,c1=qfQ6(R7^9_[a)^86hDWAN'APp4P$b$G"%q`mg'
p<P5_I_>LX!!*'!!ru.j!sB;<"ono/!!"/B,[_%:#lt#+3s#B^+TMKBGAhM404S[(
Ecc@U?ZK^oF"_$:@<-HF/pM5L/okN>F0(MI8cpd^5kfm10P#)W1P1E>dtJ>!_N!.>
&<f0d9lc$E<+c-d$s74:$XL9cK:I!8=Y*'UZYp-!UR/(?3Qo3R1qdfRHXB!Ch6N!6
njZdS+P?n9QIY*9iYAPPkn/(:5Zsh+P,sR]\.aI9#>PlO!IVIm0K9fr2RHpiqFe4=
aumEN@@+g14_D,XP(f13B%_JKi#FX59s<LVou;QD7hf0S6E8C!P`0YamK:Zq08X?>
<4.9\f2cf@cHDP\#:++prA\Pr"Wo=U9H7t&:UI\bKPP\ER45<f%e=_>6G,gHi@RfJ
-WA?(<:Vm8.<k;(mK5&cgHVakqss"W!!*'!!ru.j!sB;<"ono/!!"/BeL_Um1'@RW
_Bf0^('"=7GAhM404S[(Ecc@UF*)\DAMPl_D/AQBD/\,^&H42GJ%u,-['Ua8\lP"A
dB2+PmB]A(nE/AkD+<cnh`2/iDpY?j[-@Dr?gRC?F-#ef_?XG?q/`:S&$t70h*tY"
5`bHjR/"nsZp1H#dI/:A/#d)nhYAqtA/I(oH@[85->),-f,o5V/N?`t.U$@V"ag]S
MMQh\R]U^#*45?u]ne@n&IZSqPi@`G^cZY\oF3UH-7pjadh"RqNc>SVM'uo)=+iC=
WGeebV:Z%u-DZ5baB;sp^#07r-%(ZrXdtrOnO7OG""-/Op3MR]7/SVFSbQkMp2X?0
[@&P52k].(CPDE:)#*CtoU@<2^Ba#]MP!'eF=,Q'*2Hk`>fYGG)(O!RN),4]+\"YP
a#N.u^s=E`=DKY/M!u9)ig\FOa]\*N*.4EErH]ta>HBAMT]AEBXqqo"$"nK;FJneo
X2HJj$g3B['Zg=j'B*1K^IgTB\%blk(/U7<-;;dobjkX>JPN>NMq0NQV_^9=eE^*;
Gh^rr!pTt$6RH>9q=?5_PBoV$NAJuu=r6#==r3L8$Ze;bKAZPu9"R((bncc*2mCT_
/1*f,ZO#tCDtBJ%*MtSo5mJ]q72tLDs3-]c';E`/;,E\X(dZ_-2YD`bLgXM/(1T1f
lE2\ErLfCm(Q=[&/oCQ"5nqgor^B(q4$"FS*+NNB7Xm63NA+9+0@Th8,(*5Knj(p=
0Zk;u?l>Ri$m\H/EmXVZia\R2<d63aGShOO/VUXfPUp2FB$?F3lb/nn]67XnDq6t\
m$dmP`ECq2ZDnH0R%*`MF0h^-=nWuIp0G?MN.r_GJu(kSDe4ghn?X`#Cb7=Ecn^\<
aV@[WGhW>g3VcN<2q\X&'%5T$k$T^]-=d:j!U3T@Q(ZrGb-skRc0jd4%oXRV0gD)#
Td!>=WLMXW*It[hTWIpC9Y5^">JhnQNOdO/MGG\?Qj%LZ5*;;PZ`j/WD:&hg2r.=g
%"2\'pYb\n!q.1lf5f7EP`4pdkrtG7PB>:EU<$^mU7$T1a@26LR`?$NfhriTo?Rj3
e(2T8?jg)R@6qUI<"%s'+K4sDA,K$*J-/rWaKHE@:.Is?rDa"XP?9O<)i3el5&Ctl
%*pr',^5.G%Ccjc_4%$$`0-8`:)@i&\Wt$:7[),r#S%5Yg"Y(!GdctRF$@TKG40^l
2V*U!]K!LhX<6[QQDTO:h=[\Sq^GY<dl$#\>!"18KVj#h:Y+tdT;L2:4KIhT66_m3
:$jha2;2g!\8N(W4o;VoL'rFY/%3@cY^b@Gp=d#dMj62e7*f-t^!`7qV#@;].KYpD
?GMKZ^@P9_YD]n@[o?QR%%hXloT\B=/\<okJt`EsrC*pRk)rhW%dEEl3]4RME44M.
Rm1,*r!*3%s8N0$:eLln$31&+z+TOZ?i\[2S!!&Q<!!"tY!!%4]Eb$h7D.7'eA8,po
F"^(&C11I[ARAqSCh%U(DdR$d?VP6EEc6#;AoqBKG[k<$0eR]eF*LMS!sB;<"ono/
!!"/Bh(+CcC]OM9&-W%6'*&:>>=3=HFCf?3?W;;iATM-0G\q7>U'(NGTE##nzzzz
zzzzzzzzzzzzzzzzzzzzzzzzzzzzzzzzzzzzzzzzzzzzzzzzzzzzzzzzzzzzzzzz
zzzzzzzzzzzzzzzzzzzzzzzzzzzzzzzzzzzzzzzzzzzzzzzzzzzzzzzzzzz!!!##
PYFrk0FW^)8Gn5m=4CjBJ.Pnn"!:%#`:sA,ES"l@'#i_[r]P/m+b[ufZsILTM;RKu
*G7.^2Kc<VJB$8IN3eX;^_TZa]?J77i[)8S$'MSte]pK6G(=$[]tTpdFri?rCl>j&
M#;mi=B*Wqba\p]/#<W5,(9tokuFud99?WXd@DhY-*WV3X!+@(-RdNVVW<$GTD)(^
e0pL#rPk.g$fueR$:X;\DQNh+8IpK51ZKOXN5lmG+_2so?25FYaEusq"J[-.X$Ekg
@2j5kb:aZ4T?aREo-,2-?!3TtZn']:=!0jP5\[;"W2[*?ZUPgZoR2H92ku=?4KstA
s.XIn&)r%jN6f[!7%#)=d]Nco]'N;$O'JXaqOI[``o%&MCA3uuI<#K:[:/:-8'uC*
5.C.A4RrU[pjX*?,MHb-SqS;KJ^]^(*VL//VuPbb6[QR]clHp?n$D7;!!!$!rrW6t
9*5;2!!WE/!!!!B!4>f\,P1s9!)*Fo!"/c4!aftZCi_6^Eb0'.+JJu?.%gPAzzzz
zzzzzzzzzzzzzzzzzzzzzzzzzzzzzzzzzzzzzzzzzzzzzzzzzzzzzzzzzzzzzzzz
zzzzzzzzzzzzzzzzzzzzzzzzzzzzzzzzzzzzzzzzzzzzzzzzzzzzzzzzzzzzXHH:R
__;LRmn!A3aS46@O:X`OG<nd3+]No@8_aiaNM@a<h7k<W&6'R#"%RjSIf.@Ch)p\^
a<C9:1ouTJ'K[PJGHHUdqJgW_.OK2%7WGNg`"@1Cp!rc(7nS%TG.iqdX15+%9?H'9
7aplqYn556<uMAYV&Y4*4dgk)`_BUm@ed),eO!4%XbO'h2k]H"c^TF9QDWmU5DV<n
m*_::aE(g'frf_DCa&KI)HB^L3GG^,SoQk9H!b)u_"0s`^D$Qn/P_hW;Bdq1pbL/c
a!IDOIp039n]RJK`&A"?X2sePJr:_Lh>mTVs8N0$:eLln'EA=;#QOi)+TR'WPaCtA
!!'S3!!!o;#Q]0d04/a2Ci_7RDfTW&Df9DDG\q7LEb0'.+JJu>.%gP@zzzzzzzzz
zzzzzzzzzzzzzzzzzzzzzzzzzzzzzzzzzzzzzzzzzzzzzzzzzzzzzzzXAVbc`%Vb9
$iYo8GFNaj&_V7Z,4&=q%g^:a.GH0m1OeuR)_/F)=Op+u")ip>n'/mrpGEH?!u(@D
/#\=<"F:_tmlL\kc1B0^#\*2'*eHlc','Zsl`9C\%[qGP\NZ1t/=mP8k4g>N)2Fua
,"2(6dY9Snc7jArC3.`Bb"Z$qbI$>\qLhf6Xb*ph[ih+gB''''6eh;=T7V>1dIS4^
8N[H-!7C#[+Y3?(7J7#X]_lA9H-U3AU\YD\*32^RW\lqeL3+Pna@@>%.?\c6U7&Vn
n)8@TqoUA&g[Zo=o^?DQaiDrh!!!$!rrW6t9*5;2!!WE/!!!!B!&fWb/?JsR!6t`J
!"T&0!-i<5GAhM;@W-1#/pM5LXAn(qRkPD&T="V!q42!d.fk?'#pF&ZDQ;9jIB6[-
_$aX]9LDnSJ)?ZYFDYBbD?qr:RI@lYm^Uqa?^8VoP:[SnKZFHh#-1[bnTl.JT3#fL
MMtT`3hrOM=bIhuMb`GB^WcC<md>b\)$!LB&Ls#[6Ha,mJlT0@&IkeWP7(Mj"fC'Y
D'KqCg4D%ZQ'RE7DcN%Rk^X5eO'mc+k:'Vl[&[<2%Npq";uus+i(Z;-<U!$3.OoXJ
A#>u8!90$*>WiLgaJdO+Z`SqWG9t>uM.cGn:*2*?iF\.5_"B<Z`D\3hOfK.G[LT+j
kpP+-jAcQ`pGr!cP&!X4cZK\XXJGkf<rN]SIfUehT@!qOf$Goj,k$q1hN=:ek-LSE
m/#)?#&Tgt[*k3hO\sP-,oKc8MpMT#Z"L7HaKAZh]EBl2R+TKK+5?TX)B$_4=/mca
j:NFkqL2h!H=nnK1"d@8)XtCBSO:1cH4St#AG4fL)ia=Aeu9(UR+sm:I^!/!%P`Ti
2_gkWl^3S5];?Bk!Oa_&r-7l;3KeiY$JMK==doVVOJAlHf(G$rUPId3j4Og&8,Rb%
H@9iRI8=%.rems?gUAh=d&,4Jn2_6[#R)gb=V%:lBkos.DKr#cSK'aT^,ohP>6&*k
]!a6%Zo,)o4kf44KpUFNK5#.k_8Q#jA\>h@A/VmKS-5E*j+3<b(SbDD!4-)klCl./
iYNmpQLlF?P)Keel4A!"&Zs+m^Ii4.6:LRA2e).g-+i6Q)&+]acskYRH?J)Eq$^<!
P8q(F(G@*pE(ui^T'8uPgRPj8D8u"d::s0(8sZ'OQ(EE_s-Nf5=2YKeTrL*h<2qH?
diFD,+"UdI(>A's%sW]IOgR&q2?*aY!<<'$!)Q;j";Ch?!!iQ)!$M?1$l%"P!!!"R
!<<*6!!!"DCbKjC@<,pi;fm%oDJ+#CG\q85OO$P;0G)7mK's7kdY"#i<Y7p/LSD'Z
5sue;['OVBRAlURX?QSP<Y&Aphk0]RI!2hlUO%^>OjN?=<G;Wh;AZT^qXrtLi^PGa
J6`uu_<DJ<^%&!JQ<@1t7<WtgR;S#CG(:9O72''#G*Gpe,'.[Iaq-TT!$mQdZDt'%
$5'[\Bh!*R4IIq<c-ZB%D`N+o^7fOA(i!j)>P$qsrJ*L2U`)SA1o`?2:9C_Fs)6`\
-ce"C9),R?eU#V+ZH<jo48K?=p..1prML(9_HmG-d)?1M);66]rkb&.UH\_Y!<<'$
!)Q;j";Ch?!!iQ)!$M?@SFllp!!!!F!<<*E!!!"DCbL!NEbf`0AS#t)04/a2Ci_7N
BOtas0eR]fCbBa>Cib8j_$\%5&4Gu=rt+mAdWuIeVS.f4X69eil*_&08]XBK^Gk(>
61?_t%f9k9C*)slmM+?#VkK=Y#]dq/edWPCVo*6WJeP^*-gsUDP8Ka7\YtNF@EM)&
g;"n2*,?Bi$9P*:N&2bP+38#kpMn3;a#L#Jk)'8?F\usSr+&(k`>!0e+gtY_iq*X>
q*3X.]f!1kju/Dr59a(Db=!5(EM0*nb4gYJ;TengW4Gl6jm!W^!!*'!!ru.j!sB;<
"ono/!!"/BK2$1'<X/U)a<1H_'*&"4G\f$TBOu$l06Cl=D.PFSG\q9`=^-q+2&(L0
i]gQ:T&qqpbGm#6[7e-d<o(-=7rRBth"?UNgY$Fs.\ZFO$PF'p?BBEl!?mOi!qF-g
WRQgKO5SYHak.Pf?J$Ge]9-,3k<$`)k8\t8F+!Y_LC$>G6qGJL:/JW%#nTZUHqMk5
-b))VQ!+3O$E$hHGY1$5MTF_XCN$q,(%8,h,Qr[G.edm0Lm;01Q-41L_cU7($^/AF
1G0<Ai)._A;h<7[Do0Z)8u5B[0MMY6iWRbk5mC$i\ilP1#mmc:eINPAOXd=8-;5Cn
jWp1tYg\f97`^k]1P&:UlNAojPb3rW6PU_uV1KdM6,ia*j_Ir@GV9kBC58l:2_oln
>V7]nWL5ccr-1#3(e.r/]?tNs9PrgEc!b,7f]Y*k4INuW1L"+Tc!!?UYnebblHqb.
%dI%!Ds=HDg"_SZa2&]kVE`kQO%+QeU4YCt$m0?FUL(PkE:k/HL2UneS!ECaCc_D%
-tY;!fg8c77_QQCm05?+Cu5V=8)^CLbEWklaG*E4kp^4,<P*9'_%4$m!C-`)<]!6[
[3.7fJNW@17ZR^A#BV"Si[o,l,n*jiPu4@fs7I`rhb6H.*l4/L[L4XK>=7*c,U\0r
<%#0V=p#0'oV\=Q4T=<]iuan@nA1=/hr\u!<K>iu:?T(@mpCM@`u"3>hnK-]pJ3ut
VEU'-2ZDAg+$TStQbQE/.kY)soX""XrUAXlcTh:!lVBXs])j)/n1dXn7(:5T]#tah
TZ;M%/7)(\*+S8)i#$Q_<"E!q!,ntnoAP#6Fl@`L/E6h=?TrFF4c73V;:!HFj2:s>
EmAu9GTCa%cXhBH]M.Mfai2]Jh8T0=2g6@A:4S,C"jedmWU.[D1%PmmWPW_>&r#sr
r.GX-lJAAen`q?h#VPpHTm%sN@Hr!WQl\>G<!_m?"QH`X)$lpZHujNSof2QFH9b52
,]!k44N<EgF52!\0,760.`XMW[_iW[ML@r8Xi//t%AeYIcO&WF3$hK!A8VcWY8-]!
^bGbl+0no+,))a=5+MqGEuR-t-iFl0$a7f3NG\%:ncVi)UH;`Vi.p+D+o3)9JCC(J
^/'S!mcP8"4Wmh\U`r+s02(8\j`SGrrO?;m9RJD?'oBi2>sZ0Wd9Fnee35".iA3SB
"PnFZ@mQ//*1n$:hhZh`p5(H-DI>D)olE_N6)Lg<VT8ihSWl8]F2#P`_ppd,=lD3R
@[H4]&9T@CiKWq3l"r==Z%9A4'S)8u?DlSETYjCii@_6V@dKUjqH<[dFX<RQ]uV7I
IJMf4pEdnBQ^.Y]Ipq5n0lnZi&n[)r_!o`'LcF?H7.e$)`0O`?RCd0k0L0(-e2mt2
T3M5`.sn"?VX3gh0GdRTp_Eh";J-fBm%5eIG2`FQA^(3.dlR\-P&8LUXD0AgRc&[&
ea2#5QaP%K/TY(<pti_k9.a),02U=9>oqJd8TqOiAsBPF[:82^R]_^)2k&t:##.2%
oHZ@I^dSZ=o*1D2RgX%COPoCEWoBcj0;(1%29jFWbZ2t8>&Xcg,;X/)WT9Reds"tB
LO>P53ic9:e]_8HYq!aDd:OB0<%:6oRRQsgUYbW1kGHG62F,I"N"OWOXq>f;&^Btk
7,b>.0IsaH/(u$p>$Ckc<9krM>QL^=U&qOR#[Z"B5nmoOA8&tKGs9bub*pH<kj%)2
BV]i4PM$fR-2'A%MFb4aXZMlI=-oc;$Ui]'_Fcc=#V-?oGS/6-dr)^'A?=NS80.</
/(V>+0Vd<I*O40@EfM)@C,6#dd9.i1e0DJ)RG^L]QpJb0^*X6/*N@r-0Uou!b=%2'
_nQPb/;-t)/E=t5L3,1/8>m^60q*1c^&1S_YgdWJZ)q136MT.Nf*5FS[i#E:GCrS$
1GVgNfW>bQl0K!!53!"=Y=AH?_-3!T+l#TXoF)bHV7;F,`M-sE4)de<>T?^!Db_b:
KPcOHaM2d$;bjsu<KtV!C`KcMN:R_%-M%X`89A@%H.r&/HHOhJ%c)<enQ[0?J,@`D
r_]d\B9?eGAid#f:JF'A^:ltkZDolP*NLs\2Xf/$i4AWNlQB'<Vo3XOh%r$^/CTKu
*7M:6gGGul4!/T>]>0$6njHuCh_o,#f+Y?6nq5`nXORQo\umlHD_B<%>A\ie!6AXM
pP2D=U^8@&=UPX,?ZlO>d0=ELLFTJ>i>Yr-g'QW:7,>(SMu'8B.iO_jH<;W(U2IZo
NM:`A(f`)=?L8=E/1ODp;0HA4Jh%8<b-13Wpt!uDZG*0G1>tfmRk+<?1#-$i=)6+3
I<H'\`qj:25SQcP]gckgY.&b;;S1d+Q,5hj<GM7I^!`S$D[o6hIai+n*X1cWJAZ9<
+#\kU;PVt7Qbl3\S)7tIRUN>L%@c2)0^M!Gb8=?,7N]/o^qIajCOZBc!<<'$!)Q;j
";Ch?!!iQ)!$M>s_=UWK"98EN'EA+B!!!"DCbKjOH#.&5/pM5LgfRd!gGTap+0bc1
khXY*Q>.A)M`?a$!aRK2.BllWU26P<.8Y+9GM%E&+XpQ7lStKjFie)8&h3D3G:l!?
LU4I4_9aEh'briSr%$)ZKVp#hHlY9j*g4@l6'];L_b>"^4$->#Ds'@b1oo,dOo#S2
$3::5@V;H83Ha.-h2h\>=/$r[^>qTr=@#lgh5Z\BB9f&f0K8L6a=T+-N^]<NkrBji
Q63Tt+;I>%'jX[+e]qP_W(<iTem(bY@R.?p7lWrF+3=N5Z<bE@I^Mp:;^j2YX"1u.
7@qtmHqehE:0a<48:Z(*Orq8AE$0KZ016_hOuuWZ5%d(&"]lF2`KmRW$%]$U_=Srg
T6R(pJVBRjo3(`(4^nUYJ`G$gWF/%:"f;CHq7;@AK%LYoR*h1p\hhA1ANSX`jr%qn
isH.)f:uTq_m8OXR<6WnodY-J,`"qAOa"=d[A901?0P$Zch@Jor$KeR2=a!?;P?2C
$2lI`beN4So_0?_j1>5DYXbF$MGNKP5ZaUdb1PS+6Z#uiR*T/I-mEp<%Fi$Tlq4K4
LFm?0A&^YfH7e[4%u_uD47npIQ!cGt/Clc"Ri4(1k"i1mC-GIcOd]gc'9*Ek*b"Fu
L7EO>N%6&-#Z%R$Nre-]c"E!r$;`$SDtHtb;Qh7.Jh9*WAJD<Oa%ZA?46+se#]C9r
@](=dh%g!/[mEI]f$ck$d]@N"biuZe(efZbJ!SX\UqRE']<?:acs"JLMI2UBI^B+T
Y!\bGk5&-YN":N$[k<.'SBH<K78WhH<rUEUD#tB(\WedkY63/oq**BoZb"Eoh\JeW
hEeZ)j@l2Im46,sk1.I/gX,JnO(PZoYa==C3o;U[cWTXJ,@$ON[kL[maY]SUo0M/$
`kXm2N6pI&Z"Q2-d9'*Nk&d_C-2[A(d5<S5SM6[%C1E`H,:*3r5WU8biB)UT&JAT%
(AE,=8R+H@g+9-Z?0>#<kUHKRbcBkjI-(8r0:BT4gZ79@7lPtDm$l75Sbd5.XGBPD
WR]`/hg8Rp%-XEkEK4#Gs&,jUY>2*h"2[fO*>!PoVp#ed$prr>2"00>[bZ4:VnKW(
hr$og*Ld:hk5P-C\ql?:42!@NcOd-/AW$%'#:<hjp#-JkmC).BD,Khs1oG?J>XF"D
4)@X>VA!\HG8kB^Z*/FhFm0r=XA=lFWfOLEO!KT1iS,Vt?RiTUD#GGTU@aG&8Pf&+
#(O]bNjh\Flp&Kbp\q3BV]^RKUOJu!65bU3l/(=`g<G\#D@;6bq[.'IGbV=9Z1I/G
ilu"ZRfnAK[hoWF6P9kUiF4eQ7lQ@f17:D$J+Hb1?KW8FFj)]WpoZiM<XeDFA0YnX
rk@]VSR04^2jl\QmW5!'O`qiBhB3\^ra6H!nR*=G_a+q3_(lo\DSmadE=X_8rUF.M
\+`F^HoP,F0u58VD:Mggh[;o*jp<3dee2kEa#F#;!!*'!!ru.j!sB;<"ono/!!"/B
gY2<`T*#&nRL9)q(]XO9G\f$WDfTW7BOtasF"_TJAS#s</pM5LUfL]\i\hL"YLNR`
q&OK!"9oH=P5q/!W3kj`nn]9Jeg,6M)jo<Ys1QH2$+[,e1nZ!Z:-O0jISQ29hM^/L
;^!#3A)r\6jNs(ZN0T/8rUKc.1e3R*\BJp;9,aQ9.aaU5cTa!7>eJ0'V9/gn;T@q!
<4-[N8WL0nEm-%;_NR,!"]fRm%^)l9`L/_cjDNn$O]u3o,0R2%pMfX#Se8QrjAaK(
=V=#AXMB:1A<j7L$??Y_J]6BC)A-:T5d=fZ;]g`.3<`Qu*_J'S/dK/Kr=BY*?,0eI
hasria9S.@7Kf'*YK"BE>+:<85IjQB-4SGNs1;tBckZ2sF96A[_<4M_V[Z^H,Fa(D
/8E7J\A[CFZ5ENR-(AEaq8"J=k4;H]%D>W%KU^BEg\PUqq@i<Xq%p0!)1r?5Y8fk&
0m`O007J`4e^>/YT8[)elaNYYmMjD";&#8iaSF,,nVpqI]-)X(f(HW7r(S8\"c*C5
UcG)J@%u;AVDQUbdgSkJDl[uW'tTCEp?u2^el;EGiU!eE.F8$'R6#p+TJN?iI*0uX
r:32-iM]![5pUP$/[CEpPlth=9Gn(=%H0<d_UU*&mR8Nir,2L@Y*AoFMF&s'VT9o.
WH_;+103-#`n!"JGdS7`i]p?AOfYd);1AW&Cs2kqeWH!'KPR?3Css(B6o;`dAhYn=
99>`HhU4PS0ZXuk$k[q)OU_sh(U:+T3oXOn@m<rPKD''b-j/tL[XZ`3h]a1U`jr?=
R<\*phjH[`MgE*>5\/<C6b'B&;be[:>:Z("LgU"7QPQ;/%qqgFj.R?""P4tA@4rZ;
EHaN+n7XrM"OD__mcW:FYhdjTFni1ZRNY.>D1%iHI'\XK\"7;Js)IN&g-.HPl_F]Q
o"h\HL2L1@AX-@c@sTeDC&`2*&%_uR_[]W06/+7aN.AYLqlCTWMn$Bp#4UmWFl_8n
LKSofHM580>7WHJNR<q-VX:,-U\p>7JQZ#LiJ5HminFcbRk!Z&EZ6OpX5l0?2?V13
NTl\3s7t'jEqJ<3:12E69XGhJP.%-f4u<pqF$8'BYuaMt.dSXol`n;3qC<<d<_=a;
HaAN:0+,=j]s6FV][H+k#'IW>$5RN-GD$c8$?P#B6cetkX83%[!,j&ArJH;l%cJeK
i-e]XNRSOJr>m4j1Z)0c%1[`gH)k9M#64c(rrW6t9*5;2!!WE/!!!!B!,$UH;+:Qd
!*K@'!"f2:!G$+Y:i^JnF"_$AEb-kJD/:>h"9BpD!!*'"zzzzzzzzzzzzzzzzzzz
zzzzzzzzzzzzzzzzzzzzzzzzzzzzzzzzzzzzzzzzzzzz!!%D0?VA9j'ZJr5^I-+i
S#"NDKsh(2HZC62;1&bnh,\?UP!lp1Hdb3[Q&1ThgiN%uk?a=QN`?sEJ['o0.A@D?
!@XXQU%Tp]aZ&/["kIZ>H)VOSkQD['ZKnPZe4aNX:I`rD>QHbP,\<CB;flu]Af+`l
J;W+&4-UP*g/Ql'X4cO%M\!N,*"t*J'f[hVj1#8IoghIQ;Ml&hJ"!YF8:dIf$C%la
7MPlI*LP"Kq4LY5cDki]g<VUoS[,*U`R0+@`Fs(V->I-u%%j0O\*`3s2elHnG#n`A
Q:SiF!Ud>:f%fHl:C?L[8oEJ9ms.ub]KZjsbIZkYZ$R>/^^":rm'H7D><h0fPf4mp
+h8'H9hlI_qQkQfg\uNV#3uZId/8A;%EUB$G<)3M6<JUo+eA^;JhK;Tp'h!%s8N0$
:eLln'EA=;#QOi)+TS/[b74j\!!'P3!!!]5!!%7[06CW3Ch7Z@FCAWpAMGf^D/>`+
heno;(rbqkm2[`bD&3Zl3;eV*.WFnlC"gP[4b-1!@L_)5G1o@5hRs-I<*a]&m1)>L
n!rhd\@Ol'*]s_oUsUJn/hdDp[q7#\^4\`=(s4"@T'IEcN><g&$O<jo+$X"UIbtME
:2<qJKD38EMHkK>MS"Q[KFUd=@hnasf'XbA=M]4L+G<gE'P!Y&MG"Ck_HOAI!`@bP
4:\;IC>`FTb?k&:`.C7^lg8!t41Zp#ab#^N?Jm4.%^'>XNAI,4"B]3G::B/Qa!HSD
G`ZDlYGgMH=m:VTI*#[83\]st3*uSn0k6HR#2uT!-r!6ko"&3W>?3Rf`A\*;RbnZi
Y/54'@7MA6n"^nKIfB%QBLQ">C:U2j"Q"C[]C4nPp0\q/]:muY[G'9(YW&It)mh?T
b[",q+-h#B2+R%,R(T!)>#(YPB:.5Z^bMi\<M6?=%+SM#:n5uYTaf;I!ae(9nDH?R
UGc!00o-W\&[RssXAY:\WsWDUWDSdZ'hXr4f<c\EV=[+Q@ZQ-Be7`bp%mF](!j_\#
2i[?3\7i*'Vj%rW@\ane-RgM^-7C%),rs5V,%(>Cd@:DLV%Pg73X[MoR?XEpdc^+k
Qb2qR?>OasJ.'ITBq:l'QoZ's?hq=]fTWdb&E/*Gm>c,0LFuLfDDpftScA`js8N0$
:eLln'EA=;#QOi)+TS.aS2$B3!!"/E!!!Q1#Q\IS@o.2aE-![@E,[FSD/:>h"9BpD
!!*'"zzzzzzzzzzzzzzzzzzzzzzzzzzzzzzzzzzzzzzzzzzzzzzzzzzzzzzzzzzz
zzzz!!&OP_/A!]%#43Qq@8,FNL[F*L-ScoUapIfYlI@Bk@?X)-;/s/(s1WHca"@V
Cnlj9mBdhSTDJA?P'f6rQ?=%.nZLsE=htt:m474?-%FT3?%:od&\&1LG?FD\-N9[@
50.m=!@&IU/6fV`nqJPDKLi\j(=FbW/h=>j/Po4&:ADCY)BZZL\*-B<'ZIc$"/2d"
\dg)T4ut;WqHq^ol^fcCDN>qC/,:UsCG\l%V0Y$\qW)F$c_-7BT,RG!T[?@dD3LB/
K6eUK*E=9%1mK!h(70<"Wkg$Hi`qQqKRS>b0JP$0d@s!&5-e^JjosU\p'hZ.?mY7a
)K:oAqmJ3s@N,qK[IW2uYmQourQFK>ohskb;&dC:O_JY"e9krN_.@+p0_/c5P&tK\
@es93+jrTjk>Ul$@Dk@)N[(HH_o;5?GLfFE#&qU6S>%[VrCASMlQ:]ID5ijj\S30q
Q/CQ-oM\&Yniii99pQ6u*EI)AIgc3fGTD:HRbuGKgEOE#UaF(VDlZ)&!!*'!!ru.j
!<OhQ'EA=;#QOi)+TU=KMcacr!!!Q6!!!Z4zzzz>=3=HFCf?3?W;;iATM-0G\q7n
9*#)G!#,D;!!iQ)!$M?M<A5Zi!!!!m!WW3.zzz!2Tbt!+0bXCi_6^Eb0'.:eLfj/H?Ib
"ono/!!"/BJNf<bo)Jaj\cMj3)?9a;zz!!(.G!!%7[04/a2Ci_7RDfTW&Df9DDG\q7L
Eb0'.:eLfj/H?Ib"ono/!!"/B2M`q9XTAJ&c341J%fcS0zz!!)s'!!%7[06_>TCLV4#
CG'jKCf!b*!\FBd!!WE/!!!!B!1=60cKYB0!/:LS!#,D5zz!!!#N$NL0OCbKjC@<,pi
;fm%oDJ+#CG\q7n9*#)G!#,D;!!iQ)!$M?@SFllp!!!!F!<<*Ezzz!:pU!!-i<5GAhM;
F(f,rFE9*BEb0'.06:f<ATTXZG\q7LEb0'.:eLfj/H?Ib"ono/!!"/BK2$1'<X/U)
a<1H_'*&"4zz!!)Kt!!%7[06Cl=D.PABBOu$l0eR]fCf!b*!\FBd!!WE/!!!!B!/A>^
;K`0C!%AT^!"Ao.zz!!!"C'`\5YCbKjOH#.&5/pM5L:eLfj/H?Ib"ono/!!"/BgY2<`
T*#&nRL9)q(]XO9zz!!!iS!!%7[06_>TCNF0#ATVuHF(f,rF>5CmD/<$A!<OhQ'EA=;
#QOi)+TQ/$78ZMT!!$.'!!!T2zzzm2Z0,A8bsSEc5o<04Sp@AM/4ECf!b*!\FBd!!WE/
!!!!B!2(R[%LN7;!4`13!#,D5zz!!!"6+92CdCbKm=@VfUs06CW3Ch5=RG\q7n9*#)G
!#,D;!!iQ)!$M?7e=87\!<<*C!rr<4zzz!2^q?!+^"X:i^JnF"^s@E%ZBPCf!b."onW'
!"8i9!##G7!-BLe!!!!q9*5;(z!!!!B!45aEQW,F7!)tEJ!&jlX!-`@%A1qM2@V'(\
Bl7R)01^"r@:*PV?XmGZ@s)U+?Y!_T9ke*XDf]i/FC.I]@qBI/G\hGG:eLln'EA=;
#QOi)+TU=KMcacr!!!Q6!!!Z4#Qe3tDf0Z.DKK5bH#R>9>qUA=C`oGT![s]A!WW3#
zzzzzzzzzzzzzzzzzzzzzzzzzzzzzzzzzzzzzzzzzzzzzzzzzzzzzzzzzzzzzzzz
zzzzzzzzzzzzzzzzzzzzzzzzzzzzzzzzzzzzzzzzzzzzzzzzzzzzzzzzzzzzzzz!3DDZ
:W"jpL@7\2LFQBTB&eCQ>.4SU8!q6i!MOMbBPeC$hUqfjDY>6,assc)C:/oUkH,b;
1>=^0Z@RPGfj'KBO\!8':)ggh`Q-sa]b_!<Z<Gf(68!G3@Q(p6ROiV'0]?i+\Yt>^
K9TJ;cm[,.#KnWo$]Q?Z%85qcYu45V\"h?A/=\#jPZ"P*VNWAUe[hX=H-;iS:'/on
P/mO@QB_j>I;K<[lr7l(r^BBhKT%_I*it=@)n$o#-_XiA)fWlFj3e(*+doArYGu"M
Ea-^?(KR0RXg7OB*A1W#RKBiHedY\'6Q\R-X8o2uZP^#<)12"(L*&@LN+"iQOnSgL
E/tOhIY3U*b:Q,M*[&n6"rt5@;7)BhW;udc!`-ho#(C=]Q!A`X"XLKakdF"/F*p0\
oADb%":+^O(QK`oAuD5S+HV0'OEMZ<'9T3mijM4$^M(t7C`2]Jkr/SB!<<'$!)Q;j
";Ch?!!iQ)!$M?M<A5Zi!!!!m!WW3.!!iX5Eb0'.0.q9VCi^_n"9L!E!!3-#zzzz
zzzzzzzzzzzzzzzzzzzzzzzzzzzzzzzzzzzzzzzzzzzzzzzzzzzzzzzzzzzzzzzz
zzzzzzzzzzzzzzzzzzzzzzzzzzzzzzzzzzzzzzzzzzzzzzzzzzzzzzzzzzz!!'*`
9i&Y\%#44Ar.iAfe_Q;u6;)Mg8@p$EIXk#F&%.Cl,TGRS-QE[s)M8,^J%^=/b1k`7
NU"S.p>Rp1M\6^c,IVfuL6qaVFU'BCEgB17XPq)0G1H99p6eECGpmjLO".3?W1cl+
h]kV>nO0VncRr9;#ns-TL))q?JQg&f=l*W_Xo['>;sg]AYdZQalBBP`J(L!`km]k5
3DAefR2*ea@V=AsI)p+Ip%]M+;eS1*Y[X2E3[/iVA8K'Q7%:q)rHp1lSB+SP1_TR=
cUZ#%T_3e<Zo%<rSU&.4$,`gbnB$9?+/n#s!!*'!!ru.j!sB;<"ono/!!"/BJNf<b
o)Jaj\cMj3)?:$DG\f$?Eb0'.06_>TCLV4#CG'jKCbBa>Ci^_n"9BpD!!*'"zzzz
zzzzzzzzzzzzzzzzzzzzzzzzzzzzzzzzzzzzzzzzzzzzzzzzzzzzzzzzzzz!!')u
9hWDY&A8JNLG3qAFqkVBF>"j)<U1/$ag<MO-6Y0oo\UT;\m8Fh9.pBcL3`74a*.27
%cRR(ot`/WM@p&<'5[,!"`MZWbl\5\mB%F]7g0P=m-<o;m0aDmEtc)JP/o2G'KG7M
-m]adUS]5'oXWD)1ht;iFY[]QclL8'=l.?/jFI)[;s^W<[(!LeROMk1s1(MOp'..@
GotH*)$rks%=%s$kgUb+pq]Dm#kGY+AkdQrCVceB%-8J09-1)j4a`!++G\$.++G`&
F60-a]2e=YF@,lI.DOX./Bd\SB&q(Se_^?,!<<'$!)Q;j";Ch?!!iQ)!$M?n<T3MP
!WW5H"TSN5!!!"DCbL!NEbf-&DegtMD/?:Qhf"u<&:U7YrrMqd@M;*/KiIk6e4ACp
X^1g+\R:"*^rSJE?.Jt'B2[0cIAseH$-mP2GMdUgguPiC9'`(L<ld<kj9-]cf;Zt^
]nt._X-F\JX4=;s==J#,UBfYMe*5I;PJ'rM4"7WS!7YkE$E]f=ES@eX'l-TU_e\c&
;H6DCWA[N+.*f-,i*9?[j'q@:'b`Gc+@PK>(c'E+b*Om><P6lf&B.;>JUUgZVB+$`
oHS;i;qkSfVm:%;i_G_)5P1ViWmYRoWMO'J--5M1B6=Qq55Y\@M`YGNf=P"I8<n"&
Y"o&O3KS]fT4!G9=!d(efAL.0e5?-MQl[;O.K>U5r$.O-!_2ZDUCe?FIT@X@hC$^`
,<$E5-b1Z$ojMqoehl8eANEg8X(8>-18/t/UG8-VcX5L)]4Sbj-$Ta4`'quD36i>_
b';3TV7qOI*oJ3gpI!OgOe%Aa@UEe[_>j3!*"lS`HUnYkZfgRX)uS*#SZ4*RjS!SX
,[iAOJ\;sTW>u*UgYm1]ZABO'HqHm0$/Hu-On,8HZCNV>[2JHNND):f]"YFen.6T,
7.rt.&O1b]F2#0n^*b/H]Z&KSn(X0Y(t7bf7%MF_Lqj^WY(sjeN4&,F2^6]S6r6]9
gcOP*;ZL;oWG?g_>f/*^O7"K#i]6`"0Nbi.32W91?d,`;Sqf.*,baBSE6lW$Mc.;C
J6IG+Fl248q25j;94jI]<CW:39FA2QLlpa,:Sk-dTr$m*J_2qnaY1VO%\:dQ2!a1I
VpAR1S\St,PQ7k>in50(eAfVOZY9u^G!JR#]qA"Wn]&[+R<tf6B)+mq@g0YU&MG'2
Wo72:V6:S+\$1d?n9iMbR'2-)i!CS4f$<d7oFCp%!<<'$!)Q;j";Ch?!!iQ)!$M@2
a_[C3!!!"R!<<*6!!!"DCbKjC@<,pi;fm%oDJ+#CG\q85:eaRb0bD#+reHT!*c-"r
8s(A^/1M\D&cD`=GIeaGbcI48WW%3BZlj4Hn'1`=m!>-joa.$2U!r\/dL*4T/n4;A
qqK$=8h63X>o3makq?GXp?-(S=]Fo84$ABnGK+S`5RP/s$*[YmPZ*YFF)Q<G&3:j4
,`UrtWbtN<&[c@f7WH#(bSWQVB_L(_No#Y3BUf`jg)BM4m'o3>P,SkVf[8[JWCP+i
R"*5^JUG?($sbtfH%gDIh^;kSo/r.MBX_AK(T<j-hHV+^pf6-gVp^q4-2^@#CACY@
argQm!!!$!rrW6t9*5;2!!WE/!!!!B!2uF\!5&:3!$qXG!$_ID!-i<5GAhM;F(f,r
FE9*BEb0'.06:f<ATTXZG\q7LEb0'.KTEqV_CuNhmt1QNp28<)&<Wj'LsW3d#H[0u
%CSjL7a\t0i'fs$2!b_LAuBAbo-E`<fm9QiPQ_>5`couC)U>7uC(#V,\dg+V8AgW.
RX2NCN\k1e7m,M@,#]Is(fLc'V:^_`,>0-"AZ,9B`g"M'W.=#f"0$E?CfL=C5lJY9
D5SPc>m]N_$p",Jg\8B=[.i]@P=n+a<5QgH)2N:*Ud</tL>PnOr%+eX;IAPN(B=F8
s8N0$:eLln'EA=;#QOi)+TR-hCrfW^!!((_!!!Z4!!%7[06Cl=D.PABBOu$l0eR]f
D!Y;/NuKqjIRiB^=S&-H2Nu=a.E]%k]A$BB["q4jiagj;N$I*1D1jC4o#(nK&g1MB
GiJfJO?`m;_N1\GMT_(=fJCY%)i%bP,!`c&<Z1'^a2d?_Im.q$orWuU6`3=Cb0s*^
]i#.J8LJmXds3=N2]e5f!Kmef;p9JY3l-]pi2pd5^2XnVWL+q6JUAsAE$pI,>3qNt
EWX-\?Ju9T_J_4_'!1"gbf`q9cTlEcb-aj<;,/f>"-hdJe;cg!9aSBoS'_NKY-$4b
)9e3mW<XbD*,4L[Qa*dDPH%*nQ0^;X:,2&;0[l8YNQFO&+GQ_E+$)^,quu1t=3GhA
(Lh-7X<fe\J%8f:0KlD'3Q:o@1MI[q@ACH^DZEIJj+bfeA(]Gt1B9P*^e-Ce>b0,C
5KpAJ./W;W4_P>j<<mI,YA`+LNV(9-)c3Crgqo+AIINt`2kUR$D;h6r]/O^%)c29-
CuLkKmN?=,q@+ib1d0MY=/&0t^L$:31?33.$ZAPoW*.</(F[@Z9m5bMAis)*E\5*<
\/563!uY,r7;B4Q1H^4NmUJ_I"[rZ<*^ep=E69I8=)+!tV%3Ou-T'^S7.D>7QF+(.
/<O.(g)_LeJhC"M\,fb8$hEqfT:S1EiQ:+%T7$.EPK2SCEuS,>gceKr[bU=YIJh,%
n"\dSs75n[50]rgO-_d(ff(!:qtZSn;@b91>k.Hmn"0LIh:'\7qXs/M4PICK+5?9>
9o)3Ha;MS4'3LpJIW?uG:1>2Ql:BhMFF-st<U9^(XYBA*HGjsbI/tnZ"(#=uE,7[p
`DTRZbW"S#!?Q:,H<b\8E)Y(oH$HtqkPiTBd`1+^ps_6H+/_kaLW]kJ/+on.a2B_(
%`>9_F-7/ioPaY\&C9XuV:>&$+e8lkq+RK+.I(@,Fig!l4,HoBmF)3tZLSk=Tltg)
GTZT<o<!=(:0f,]$d:`QNsTm_GTAFP:4+P33+985&$Uq>7NS\M`5W7_Jk42oj(LCu
;YjpA$WsSIoUEWMridKM<T53VU*i-q#FKQO3T):`(af]pbqtDsm+_(6;A>lf>l!<5
gta.M)<-1qS`.:YM%f=?'>ZgS=50Mp61cg'iJHZ=_VP1#@P^]*/CP>j_ld92^"Le;
cCNHK+GA]04=(-dHeW$rO"VKF(Im;<JQ;E#0<oD&2coZn8gH^"Y1]\n""Kk+4X+s]
_k+cr3T=3#1r3Xfk$&C>-["C4o2=gi2EA$n[jVr@O=sq<gm4VN9((XjX`n7@S6bto
qX\hUSG9e=*eSn:i+;X/aH2aS!FgOehi':2-7BL=N1n&Vd4L/6i@dUk\SB'K?FcK9
Bo=Z1@H>p"#u.$rr1#9aU49',nJ<kq;"45ps.*&#(T$Jj.r][jre"e,!&)e_"AY+s
cFU)l/utH!Ip^amg<5hjb[iAI=j-Ts^0XGa;j8q3fb@^5e+6.S[X;\OYp6Ycj?T0:
O+]H\km.Jf43I1@2_Dg6$t&T1PCo>4Ch/Xcl5cnaUDPYW2,lHXcFM/!cQub6#ot6H
Cmq?aS8Qf"=sf#PRWUZl<Sc3L>UZj,`[fGK*4f*!6T:H&pMQb_oL%f=bITSsbJ&oI
emtoqFcR-ZocQZ]YDb.c]+?LH*\1DtrAmpD-uN8jVJW%/YM9Cie2or1AfYDq`^+l6
eT&a#am80Ui*9rkG<(l?)#tuV3Wk71\$`>"Q`!oOV:l;Fg+gH:2qJ<c%:aVpcEku;
\R/mKgI4XRo<^%!]:gpRfm4[Deg,9r)d$i2"\[6G-YV!S\6#*V744Hg`u)N;$cj?f
hmtM2_o9eeM/:)E$F;::<!+]3bi+:u1,_\%+p'KfF99/R9fB6*E/:d$=p%+df,E6F
>5>WF#=3Qd9P-(9;0LTo&aeiL&K!^l$Lb/fr7/VeOtS!68+H3[*ODTPM]p'6AlUp3
8gR^^<&8Gf.GTSnLoe\4EsGW=]Co6hae<MjZUKiE'?)<i$uSUX@ubigpqV3uf*i/F
G2_sr+0^7le:%<nXZ^<ZAoVEDXJ/Kb5FK7"6f,,K3(+df1?pdde?\#Dp6t:i;8&mG
F&(O-3"RXiMTHje[)LcVX>r?aF\TK`K#$qF@u&r"B8"kMYBoblh"e&%#K43V1l6-'
c0\_PIf'2e@fZ7Y9;\Kk-/;W2$q4NH".@O@ClsK&Y7]_4=pisihQ''#Y[<=bV+N6V
QGRrM.CGmf^!r%9H?C').t_0q&KE>O:9%07@6]>o%(=<^mEPFWeU=a;V7AA?8XZ%u
q6Da1>hrIscII>d%?JO*Aj/Ho8E[ZUD:G_tH]:q8hAqlu6*F:'pD^foT[@Zf7Y?0>
C6'D>kgY.#DS7,ML94@Kg@(BF7R`g(C6tAtXk!rNh:=:H50D%c=F!@X\M(b3`ia*,
!WW6#rrW6t9*5;2!!WE/!!!!B!0Vj@5)9@B!2CP7!"Ao.!-i<5F*)\DATKJKD/A99
?Z4p`&:Zq/^-`V!*bc60CdE_SBcCc_?LP74V0b(V"26fSZ:t^R]'k)X4!B.V"h%^E
]reZoN]mD)1EQSOs1HFPo72N?S4.=7k.;+8#u:ks7..N]gc0KuW=V]7jU=ZI&khuj
i7D?4;Cs?3RprH=+MhUL:6h:@4AR;&S0N=!B:-N%N/JZ)k_b3EB*+i-l:!`+R_I\L
E^Z:1.J32l&0a+Ip[_N4iV<m21+&6aV4m!3H.)RF@9fH["]6(%)^WcRk_Q+B&1%uG
qLhX>'#>m?e/?X+Ga=Hp58CZnFZksgP^r==P_.9RRqoSg`/0`4T"kk)DkB,TB:LF8
,^dm:jG"eU2F6f'nOFA\:U%aUX?g3BG9.<LOf%FRq?a')3"!)(//RL^L2q*C>Tue[
K':#Zjb,8RYZYU^]9nouYe?XiBfW7O'q]B_7SLga)op2uqkE,So=>J9dB/oK,jGV`
dgpqakjoQ-OW7$W(-aieH&gOS]Z,D)jfO_!XKYE,6[p1X6X55"$)O[3Ds=rhJO(A%
6Xdf?kVu"X[%+tX1'h@$6Y>12ZR5f+K;LB#B;[r"5]TIp/]Hf!pf!kqD#S._j5L/L
.:1phE]\+_:/,-`5"7O'"$2IQ80L9aDB8Mf^lAm#'P@co$8S%7?c?ZH$!.J.GgK4m
RW+"[G0+dD[Zus5+IPZ9N`.^ZJ\6ts6MbJ)ru!O#T63'hf*5ZigTh$j;B7C>L,q!5
k?t-oN=-E7.7=&M"^]fSp1n_hXoF=jJrc6NIdifTI.'dcoTOIo9pu$70KV`&,95Da
UDIH=jC:aL$)[>ikMO%[.`Xmd?=XP8kAdZ=^bGk$WNI\m-CbT8e#%3@d:p<ic-ibY
D4a5J=_'#ea%NgDm@`-k/r/RG.r).ke,iIUd';grQ&[P)b$q@7W_V"mHEa:3<LiF-
$VD`sa*,:l%n3&V3`@ZPG9E]^_$%J^.$igaTL_s&GnapM_@+7V>C)G!hP4BIK/2n!
rmj/t^\sJ[LViJ0+Q%.2gNc!&+uYe3D*_/L$Jr6LWq8`ZLi=:^Rm^U4ek@rH;Q(V1
<Tc_ap$#at"n>Z?+?4`HloN8k+oSR7*-HIU'_U02G/Y%Y73=4D]'hp8;tiPR;_+cs
MQ'TYjChXCEc6*;Uc$E:F$^UM>7)gPR4bMf/;+WCqB`^/[TJX%*g9c3.REJ1>f_:d
3*c9IX:ITOJQZ/\`93!j<hCS6.-6Mt.<F5rE=?-MR(C9IO-.ALK"`XupsrC!kr=Kt
Nc8"fM#k,&I9J.""!-=^/@smkR+X^qrSJ$DZQGLd`(`/JOV0Ns!iL:tE0K[Ch9No-
_)?]&$F!Kh!(0qi(OD+-6s#=$rqBYIOtCU6<&\2p1FB#OYko#nM4LF3?%@t8d"m[Q
@*fbHECqeEgWV3"]2nu,RXnr:Fkabo+6hdo6D$@R3p+2pSYrp;!itcEk`,alpB9<7
&EG?pddB3Fs#cV4f^"I+]WI?gb9-%16VZN>WJ#7m*alg.D[W/IGCB_lQ76P:oI]jn
hYAHU[p^s2oPjFPrK_$QOk"^eWAqj7RSu(II>ls]rOYA#Th$\GrCJ'?1*e'QC>W^G
4Qtu;%0s\."GdkCS[fl*qp4s);toQ<DDof=iH_3S_I92Y%^-dZqf6q('mJVnjmq<_
MqS]SVjRcTW+Ua+:JuF['8<`Gn9<DbjOQ@mHio1VfQGlZc&R8c#(@e7q*Ce360F7!
:+L/!@F2[P["m7A*7eX2:OIBX]caO4GZsmHVr1-;QQGJPl\D"\-u9N<pF,!c45j2C
X+UEP!!*'!!ru.j!sB;<"ono/!!"/Bgm;tJ/d).S[130:(]XO9G\f$WDfTW7BOtas
F"_TJAS#s</pM5LUfUcAi\hL"mnEb68+5)rD9QQF4#*'K&"VD<p@9bn!)IEh8ck1C
oY:,k6H1pQKE`bXE;]MnpS5Xeb=btt8'49GWWZb^7h2XV[a(pjK)YOnfc),*85cQ]
_((nH=";R`l-DRg:5hDq*Mq0bL.W_)-fogDGp;"jOpIEABa&]=N0crL=2+@GSl;rG
&!_hbpjVRp,d3;<)"UrkfOg=[FO%0Z8LnLG3%]phqo(2F$d2R_\'UCn59KU4N0Sa_
=QMt(?Ss9Qb&%!_XV`Fd!rRM`&]pOZ%Y"NWLK9D#?YM"]N&/:.dKO7/fR3)ca;]CM
X-p-h^PN.b*iI%`-1F59I*O"mYIT5m=nkRo\0b/5io<D?:=)4F\k&/B%XPI+3:+nU
Ol&g\B[Idq90<S+*;U31^M#Z2kE'-6Q,Di55nA5<(duH7:36O8RF@@5I!-c<IA6tj
,R#J23St])^L]gp%M(k?Wn.tqcg&=oJG>d(kQd=ZP0*VmB=''"P_/5\Dlj^;JjQZl
f_fQn06Mtujj&_h3b--9q-*2O.<O",DTJN5^Tl64c*ob@dMO1%8nkqeSPtY:%>-+4
<g0ci38s.e\`uU361Uc-:M3;d`c:([5p&,?5tG$[?.qpB]XDrX,ahCe4#p,:5U?%k
[4!(`2et2RaH=(sHVTtalGkgU+[VS@GYeee#%.J[j4']G7gMS-7\nXl\;ck],6i#'
g`f_9_=ZH1Q&bb.<t#CeCMc<(fP_>+n]f%_F+7fi&+og_)uHa=Yil62?S!7Gd32a3
_,)FM$^O79WWg.Z&W[Ah.iqO2GK*!),RCPq4?E26#%?L']7[Q,d&\8cbi"7;5(.Y-
`eW19Z1r4>UUtqQ$jhN$m9A5b[6`GM#>mHq]fL:Od%bYnKXb6op3tU,kg;JuU_qfg
ME7=GK_6UJU/p']2/LVd8%oq^d<g>g/\:6a%'Vhl;@Ej5r]3FFNaDufG@MK(l^'ol
%,pteo\?1QI_eFbdkA\5r3@oG)F7U9Ak&G?^=CVGa(e;X+!(u:dOK'b1hhkXoKP;L
(?RX.a$t."W^H*d.&<:u++N)PK>+r.U;e(Ea(VJE6(L#%eS-nIU9G.*r%,EQgVm=D
(s#EF/$cthEI,E'Hea(!4uZ%#*eYt#PA+tb^U*"\oDC.R`l1'jN6>E=%X1Ct>C2?h
94r9m"E-2og)o5)ROiflLMhW$gZ;pid-QZ0i6=m/!T#B3)rSsB])gb>V0Cj0b;GdL
So!YpKQ$HS3!J.%*>S.]bnB?SC40W>[CHd?#ZaX9/o&/gi&;^25(k-b3?,u6r;tLY
96rn=&h\m%Z%LbY0c[:&eDXp1'7iBMc"O](@3r")E)-E8!!*'!!ru.j!sB;<"ono/
!!"/BU(@0J7f`Si=TSR'&HE(;A8bsSEc5o<04Sp@AM/4EC`oGT!@XT@!<<*"zzzz
zzzzzzzzzzzzzzzzzzzzzzzzzzzzzzzzzzzzzzzzzzzzzzzzzzzzzzzzzzz!.9r8
9>`FtL@5<G6cjbGA05[sD$NgZjZp&EGScOLXk9KoM0AdjVB;k(M3+3spW[d9F%Er-
Pst0G`o`OY&<-r&5`&+qlB%[*C`>!(?l`=3(R9RTS\_%CH@$;5bsZ.$a]'1;bJ=CS
Ub!0?5tC)p_q9hkPh\abTtIn=9Z`j?RKM,GI..6r#pFN&"NMg4*&kZ0%n+nlV&5<j
dhFB!$4I*&TU`tXUA2dp^m+Q=#H]b%QFT(m5>rYJba+t:#PZ@&K<_TFW1LFPI"$t1
G)su:W*uit>mWc1/-Q[k\>r<7iMMM&W6d*!i7@;nT(b7dqfD5:Y'Wn_]7YYCHk=lJ
^*p26bsSp.l%D`$8EM(dARro]5HFOUmB?7YYc^grc2T0>OK:d[aQT/==)>;^&MJYk
``JcUr<<6%s8N0$:eLln'EA=;#QOi)+TT-LN;=Ip!!!!%!!!]5!!%7[06CW3Ch7Z@
FCAWpAMGf^D/>`+heq0k(rbqkm2Za>gBBICM>otd/"<!,d^4q?HN<?h"O2H#UeN]5
h2C;M?(5+n]<a`>3BteDQe+;VJ4F%=1qJ;/"bo;+cE*gJ=7F6n6NmV<F1pRcd@u5>
iSaCZ`t+N.57@UHh:bkJj8HKH,1g[bipO[B6AI5-Z&8GJC=eReXl(_=&]1Rl8heO7
`MJ<q_GYOV,,2UG\K+O[eB#=NOG!3&K,+Ti>McNjYnL+@G8BO]qBEY[BAuO,ei;.U
M]`e'^6bBM@uNui`M8rtH'M#%;_'qD"YR=m=U.[5geNpF=MboOX@9Y%1!3CWTV<kQ
b2\p+MrZ32D>P7RbuHaYI5iG^]3!F?"5eTT1UNm[?l^n7%Y6R1&+7&TU1UJ)_=>lU
A*ch?RpCL_]Eu6>];0&k.d]J[02CEM?]ie^F,jCU9:VZ0e0V+6_GHHZ$mc'/;qg6D
0(FdD(8%O$:e1Ng7W/8:7`gn>Mc#nHRt<1H<+Ln*jZ.$O=k#=Og&s@A,pBebAG!iY
7g#^;hO4Imd\$YPnMu9A4[1u^r80l[ItO-fT+_@N$;,#8+@bXq-Bb'c@=hC/=^'/r
08oTG7(XClPtL8e_FtSP&l@GSj2jDE1ir$A(s&9*&)pXa#.TY<@a[;%0;r9gVUOl^
59#<fn%=p\#hLiM4ft/3SYgo3>s/8i!<<'$!)Q;j";Ch?!!iQ)!$M?7e=87\!<<*C
!rr<4!!iU9DduUaDfBbN@;p0<G\q7>U'(KFTE"umzzzzzzzzzzzzzzzzzzzzzzzz
zzzzzzzzzzzzzzzzzzzzzzzzzzzzzzzzzzzzzzz!!!"hP/2%j0FW^)"8WLZmZ!aF
.#'uf0r-=?=KqitHfnp#eg=%A`#-VQB$[b!Rr"jVe*XL]ae/G*M3<6G[$GhOPOYg:
o3&mI3peHXFsVXk5$`[!/.oB!XERe;,:<D_Y!0pLoDp0S9IsDX<:Ybl/;-R*_%tHM
b:Y<QO"F1'j%fB\2B![NhRD]>g_@`@^]U:2Ydt;l6U!O`3r344b3PWP]l&lS""X0r
"D]hj^86-63r7oQ@aC^,,G,nJq4Q,-0l<,BF+\c\%38Fl`AEi!%2P:UKW;j8Pi>r0
.tiA"CG7Ilg!QN]9g5jnIc^gjE:s_Rp0]38+<#3`!W0;[).FNt7CD^D+gDBBrr(%*
^%G:a^/5idl&f[rmaQVtaMDFtD_U`miKA:uaC>!LY9D=Y^unYcJRQJ\UQ-RsGf.Ml
TQes[hZe&?/=`Ff`r/F]@I#"dn85.k7Cd+T@[5j0[.I9_Y4=cOm7ilU\/eUg4b!k<
B6YGH]UIa(MVB>im\D2Kq/<;u!!!$!rrW6t9*#)G!#,D;!!iQ)!$M?u.uRMG!<<*2
"TSN9zzzz!*_g/DKKH-FC/!mE+O)r/pM5L:eLfj/H?Ib"ono/!!"/B[8en*oDejk
9EG1o$NL/,zz!!&ht!!$AHAScE@/okN>F&5L1!\FBd!!WE/!!!!B!.d=uQh(1W!4i43
!#bh;zz!!!#A"onXJCbK.9AScE@GAhM;@W-1#/pM5L/okN>F&5L1!\FBd!!WE/!!!!B
!7k0/nui)p!7(fK!"T&0zz!!!#t#QOjLCbL!NEbf-&DegtMD/<$A!<OhQ'EA=;#QOi)
+TUuQCmjVi!!%`S!!!]5zzzfa@c[G\f$SBOPpmA5dSjBl7R)/pM5L:eLfj/H?Ib"ono/
!!"/BW1<M\]Dqp3,lmuG,6.]Dzz!!)a%!!%7[06_>TCNF0#ATVuH?ZK^oF"_TJAS#s<
/pM5L/okN>F&5L1!\FBd!!WE/!!!!B!/"!^aArNG!6?8_!##>4zz!!!#k%0-BQCbKmD
ASl!3FD,6&AMGf^D/<$A!<OhQ'EA=;#QOi)+TR[U$pKIN!!&c7!!!H.zzzHPHM\G\f$S
FEq\6F"V]SCf!b*!\FBd!!WE/!!!!B!8No[6nSTB!4<::!#P\9zz!!!!O)ZTk_CbL!N
Ebf`0AS#t)06:f<ATTXZG\q7n9*#)G!#,D;!!iQ)!$M?:&,^`D!<<+&!WW34zzz!0SE(
!+^"X:i^JnF"_$AEb-kJD/<$A!<OhQ'EA=;#QOi)+TT-LN;=Ip!!!!%!!!]5zzz&0_)S
G\f$T@:F%aF"_WD@VfU1/pM5L:eLfj/H?Ib"ono/!!"/BT@BAcQiR0e+Th]E&-)\1
zz!!$:M!!$PJ@o.2aE-![@E,[FSD/<$A"U4r,!!!E-$igqC!!"Msz:eLln'EA=;#QOi)
+TO>fm\E#O!!([o!!!c7!!%4]Eb$h5BOPq'F"_$:@<-HE/pM5Llre1DgGfiFI_bme
Xj@5pEKKkY=4C@uZEmV;dKWEi&%F7t>,!$T-rD:i`9C`\ebt0u@lJdt/NHSkUt`Mp
UA<`'_r5:kiQNO,o^[c[6(Jt="_$NB%=<Zli%ee&.9BIBVg#&qaE</(AWA/hn^P7i
_YrHWc[U8/9sQ:fj^j-$m!t3r9X:XE-"St(I?@go!f7u!E!^SY`X=&#aB*i9d4H1g
W#l2Z^t2%\CB-N85_2JZXQPA?B?MUCn;Lq$JP0^9E(lAs"N2%S6t7eV#<]S1Yojos
Jh:Oe@tcekp]SUR^;#Ni#XHOp`8N[HS/XkoDW(@`85ZoQ!\D"[V%I`KQT<>i`_4sE
Q@=rjNiBt0"B-a"-$X8i/.P"Z5lA3r4E.c]+;]\DH)JQ'[I*UD5mYb?r4XKtMlE2"
aVKKhW;m&gJ)j+("N"[nj;l2dTJ-XO8H.bcg4`HnklPGJ$AQ!0UUm!tUKoS'.XaC$
+c3!s?`Z,`,eH*`M'`Urhd(2V1T<W^7$X;U0'!l_ncEg,m\QpK^4Dn&A[em"PX6u6
@H;q?iu_OhQD83[MYB!ffQC#YJJ\r^]G[N.>K>-E$@/VFd=Y'k>]B?ha31sMNVELR
8HA`@Zr]Zqel0&2;H%/IaYd+o97>n_f+9klM:<.D6)uZ#^m(eG$s[@J0M:n76E)$)
4i8`1##MigOR?e]gb0[n=5bG>o@3_3;0l31(bj[3^rT2[@V6kuf!^E1?eTbL%n*K3
h^8:d,tE5PTBEPabpdLTFMY4P+;+AX&/Y0:^Ig@6NK.u[I[a%#S&Cu`Nn%#D*eOoV
@AcGGot4i#L1WBfNkfQYGe(b\4;5l)hlKed0c%K8hZ#A&E1&5@<QqT#Zg&klbXSRi
L,r-_ffM'Y@>ZAV4./rC-BC/V4%ZeE4Dd%`Y%PZWShY!2Xao:ZddV]TCB5lBF#/)o
pg)#jlgR+!'%X$Mno[IHG`JnO.ks$ng\)C9e^a6SYO!&>Ie2R[7ArQ%6C:L[Cl=<?
VXV*X/Y5rt#OZ,G'3mTpOk1=h'ZkAbSaT0`l6Q>sQ+7in=/CeUD:T-&$_'1m$L'Rm
n[*lmV(.g5bL^tB=`n5H+Vp^Zl(-L[d.*$-!^D<u_pmQSP6"51S)gZ/c;ls4b-+hl
"5\B$0=#mhC.lbm0c4-6F.AF!PnL.i(;ob6_nFegZ?[3=Lg0g.lf*A&!Gj,8fKa'O
RlPnm/B:7H0*o;B8mBu"^]qJ+eCj^9TS))Tkkl`J0DZNs5qbjiETce#3![,B8NJeV
d'X(#n3;pT>N3+h1P5m]$Tqar4L\Bec%2dB:#gI4UhSi]B7ma]"QRunRE(FK+%ESM
4H0/WRf:l!_`ml!S$WZDK1T@3pGID28at=Y'JCJfk?aN&M0C]_NkJRXlA)-J3/Z2\
Dn;CFccpq[Kh=);BY22p)5ou?<q7B<V4UFto5t3OVKr5Qfe!VqcTuK-PtG(bYIZ]+
(<9i*0Pj:`;?'7>s&To%.bN1q8qH$ZTL0hfoE`&d!;Ci8m\9J!8rU[Ha,gM%6#mf\
[RbB,V356]BdB(</Z@%XG/\@Fn-[I@J&=?b#gE2ToX$,AOaN.GDLF&2-0BR9(RSk#
[DB$DUg>T#^*FfS9Dk)k.ocJ<jRUGe8)`)5[;MB^,P@e)OeQuN:_^kHBFkWndCkr%
lAq,-Ych^;m_Kc5mT@s'_j3]FT]]Ek-TFuaXkqeLh1CmSBPm.F'Q\\]mf\^&(X/JY
(IeIOG?ROM>GG-k7pKM`.!.SQ#5lb;H&_F?;l)ao0`I)CfB7rs)cO=p16\M]GZ',5
!8_rs6>jGG2SOU!VZU5`\0(BL-W<at'&"\B/1PU.PUgDIl)HSRi%pGJqVBU$&"%c>
Xk-D!+/udk5I7itU3]uk.,[()C_'\)d^,.ik+M!bs+.`*68e$JU$.(L6]r=Tg6Y;*
B"8Vc3Gt60%Fc"PYGid[2\a]Qb:K+q#O/p*hf8/[YBATXn#?!<gYFWoX7qi=o_b>X
b-r,abg`\dp1?it[anAXm;#^OYuSL/J:+/mp!a;6[i!jL>*sjmUJ4=/lJ#*WZtmE'
dq>0;eaB4,latgL<aoio>&EJrBg]9F\D2o#"2!#HdbEMnP,Zt.R><dJ[<Z;T@6"qM
$.ud(a#<tUFDFe`cGDA[k#FJRc]q9)mH["5K9Pgf%;-`Ppn@]nPE@d6_GbA4RR-N[
%>VhXB_NT2IW>ZKoRj[0K^`)l9LL[m!\38*V8$)dK?YCW?__,),Ab?d5IPZ`J$Sm;
G3I\?I=1iP+'NkE2r(%9UVek]H0=!Nb1Yq>P;sZA=!'<a%/.g%'*9TP=1N%X'oW)k
W@uBLZW):rG2r32q4mri!!*'!!ru.j!sB;<"ono/!!"/BeL_Um1'@RW_Bf0^('"=7
GAhM404S[(Ecc@UF*)\DAMGf^D/AQBD/\,^&H42GJ%u,-['Ua8\lP"AdB2+PmB]A(
nE/AkD+<cnh`2/iDpY?j[-@Dr?gRC?F-#ef_?XG?q/`:S&$t70h*tY"5`bHjR/"ns
Zp1H#dI/:A/#d)nhYAqtA/I(oH@[85->),-f,o5V/N?`t.U$@V"ag]SMMQh\R]U^#
*45?u]ne@n&IZSqPi@`G^cZY\oF3UH-7pjadh"RqNc>SVM'uo)=+iC=WGeebV:Z%u
-DZ5baB;sp^#07r-%(ZrXdtrOnO7OG""-/Op3MR]7/SVFSbQkMp2X?0[@&P52k].(
CPDE:)#*CtoU@<2^Ba#]MP!'eF=,Q'*2Hk`>fYGG)(O!RN),4]+\"YPa#N.u^s=E`
=DKY/M!u9)ig\FOa]\*N*.4EErH]ta>HBAMT]AEBXqqo"$"nK;FJneoX2HJj$g3B[
'Zg=j'B*1K^IgTB\%blk(/U7<-;;dobjkX>JPN>NMq0NQV_^9=eE^*;Gh^rr!pTt$
6RH>9q=?5_PBoV$NAJuu=r6#==r3L8$Ze;bKAZPu9"R((bncc*2mCT_/1*f,ZO#tC
DtBJ%*MtSo5mJ]q72tLDs3-]c';E`/;,E\X(dZ_-2YD`bLgXM/(1T1flE2\ErLfCm
(Q=[&/oCQ"5nqgor^B(q4$"FS*+NNB7Xm63NA+9+0@Th8,(*5Knj(p=0Zk;u?l>Ri
$m\H/EmXVZia\R2<d63aGShOO/VUXfPUp2FB$?F3lb/nn]67XnDq6t\m$dmP`ECq2
ZDnH0R%*`MF0h^-=nWuIp0G?MN.r_GJu(kSDe4ghn?X`#Cb7=Ecn^\<aV@[WGhW>g
3VcN<2q\X&'%5T$k$T^]-=d:j!U3T@Q(ZrGb-skRc0jd4%oXRV0gD)#Td!>=WLMXW
*It[hTWIpC9Y5^">JhnQNOdO/MGG\?Qj%LZ5*;;PZ`j/WD:&hg2r.=g%"2\'pYb\n
!q.1lf5f7EP`4pdkrtG7PB>:EU<$^mU7$T1a@26LR`?$NfhriTo?Rj3e(2T8?jg)R
@6qUI<"%s'+K4sDA,K$*J-/rWaKHE@:.Is?rDa"XP?9O<)i3el5&Ctl%*pr',^5.G
%Ccjc_4%$$`0-8`:)@i&\Wt$:7[),r#S%5Yg"Y(!GdctRF$@TKG40^l2V*U!]K!Lh
X<6[QQDTO:h=[\Sq^GY<dl$#\>!"18KVj#h:Y+tdT;L2:4KIhT66_m3:$jha2;2g!
\8N(W4o;VoL'rFY/%3@cY^b@Gp=d#dMj62e7*f-t^!`7qV#@;].KYpD?GMKZ^@P9_
YD]n@[o?QR%%hXloT\B=/\<okJt`EsrC*pRk)rhW%dEEl3]4RME44M.Rm1,*r!*3%
s8N0$:eLln'EA=;#QOi)+TNI8>R*(j!!&o=!!!c7!!%4]Eb$h5BOPq'F"_$:@<-HF
/pM5Llre1Dj#.PLI_bme<S.@)$:QV6?a3AbaDnh*Z5[Vg4lF$oBSgob:o'DQ&nd.%
Wr!+sa#\U1/N_8DG40a8bm-`Y%S*%Ec\uJ3Qf"u=l<RgA$"ma45)=RsZ^_hb/][k:
mq0DOpS:-W5a4&ep2@2-^H_Ynhd5H?quR1I?D/?c@"cX!55$XoW^^DFo*\eIH,(rS
?uEeLM%gB;1+WR>#3.!=P:5^M`ea'lTP#)i&Riq1nX/usYol&uo"6S0;q?c?'Ic:4
?B@c;f(-<uP$8\pOp`o<665."FN0b4J[)^(Y.Zk!O:%e&4H*2,$IQ+#q4SR%`0OGS
AT3$7Kn@pX^dZ6HKB$Y0Qhb;]'c%3OAXk4%[G,-c.)\b(0'b!;m8i0+S5>qtN8)(O
SR$2R_0_*tf0j",p@C9"5`e/EJ>aP"_IS9aS;sDVU"DC?7pYL[\A#0"_@0:&8,9!9
Tr#D&h9>34/f8o"\XgH26r@bQ<X)Nd?Q?dJUH'uFc@dRTd\(olb%F+5Fb6DM6NVKK
q`5)6)u*Q4ILRYl.<'i/.gHcupu$MN!```;^9<[7^5#f#@R*VDArnI8NJ75+<2t$,
N>Y^Xk=k)h"^\iqh8g,"RRXNR\_.]P^\-5l&8F8m"M)HsFDe7/mh5PQ-&Gq0/f=7A
P*ck&RZXdj928&5,F"XJ4u8^+@0'@YZa4U@966_NlDDE+#j/Dl?-*/JX:H089OMBY
Ek*ug95!"*B.faip'3_2`-8$WQP-6)oQbcnNB+,C%aVXa!<FO'/'(uV5Q>>A>$3/`
$i"S;&2qb*k_@^36lq*sL>c0h9"/r_oc<F>Z7SAp8FU)>F*/\7Z*7B1DdtAHU#,g4
HC,EcAaOPsHqrK1_]G&VBQ=?X'n<+d;bXI5`>16Zb1/mfZpUQJ&m:EOi-J"cj#O#\
h%C?J7@M/edolfaEFC5uOLWClj]dQ`\:b<V8?pk]F&?=XhFT8riRm#HKt^_1rlBRX
nQ.B(?GtPT,D>:i_6Fh1<!LYfjg)2`9R1S)H^_18_]M9PEDL4M_5[/<o>Y+jrDoE"
13ce[aP(7n^hdF"B2'L3LE'(t35TdI]NVtf946;8H\aY3Eb%pW%mlHraU!?A&&VqL
8%2p4!9nioJo@Ej;3%4<X!Qefq!QX)SDK[L$S:^#fPueH\0,uFV,$8,L'Qdp>IV</
n/Pcm\,OG5ni!`Q[\FUSTX0BtQ6-ttn6pDM7:."1NU2eC7L*q2'=IiKQg]S$#tl24
UP%VNN2)$t+bUrMES*b%%N;DhaEXOAmB4**5Yh;1lZ<>.QDHlkg,femBUArna.4J8
mO-Iof^EoD=n[3C@"!(+R^O]RhPb&II>qUEK_J^29$iJ$BeYIn.%%rjBb5E!8S?VD
B#jl'mj<)"St#c"$V`"<]loU,b;QIJjs5-tZ0\6Lf^YtnB[R&KEg\J=dSH"Jk"AE;
aAd;-arQN@/n!<W\46Ei])067GF=1;qpaj_1A:/=[!0mSatch?*8Hss=t-WO&?q8V
dQ7oGZ^`B6kEtAjO3;R_adbs::D`s*">?J<r!Dia'JT+djI]^\L=C!<D?mD3T4>--
IYL:o?NTT:O6ZP2icF[a]d.E2D2G9BO@!7*kp.=]9PjQtb"@;^Dl%-t+I#.C%`cp<
Upjtth)+A<LP`WC]*a:[R[Ca5[j@FeBHWUQ'8#H7XP^lsh3,!@ZuU=oMM8%O\"#r=
BEDK=[1_ERXAn%'#floTQskOoZnK&rr([O0`5VSX;5.F.GXq>J;^<ut.FSXW8]'ne
<$2Erf/mBUNHa1R\$(_^TZ%jnPHOB9\t`Ip%g851"e1Wj$/HS,1>CGEZYh[>Orj,r
g"2o%4VnTXV+u1.bXV93C/?(H+NMT\X.m$icV7lh6/B?U'+;iI4kcoukaYCuA6,SR
V3/Jp/0o,u.9j,D/Fh2X.WTPuJ`b^TAKBbQ]cHFn)uT;;h)3c1@QjR62pC+C4^eg0
r$R?l9gh40H54BT'M4Xnc'20('%NUm<,XuDmtkd8FbJ:&`\*/2G2U5N*KhNA.T;[W
m<;m6[b4pQ5'juV=T*.Mg[(igBD.cXdtf06>Ht0[RjbeErVS1ZMVX@f;stMHh_=>?
jITc`Ojt&r\WdcJ5H&H?`Ln!<lC(eH4?Q]Rpp[I,kk:$ka&tM63eK'W+)s=IL/C&@
qLe#TMNWG'T1//H6ZepTJb6jYdr%K?7t2FF;t'i4j@s4"5/t;/*6;K^M)69^r!r1"
]"^I4Ii<\#l\g2enkUlAGF9E=BC=\tb^Eg2qj;>GgjF-;#Pds>8ihZIo#-=a9&`iZ
>A]qMJ$/EfiU'gK]k2>)k55#6*rl9@s8N0$:eLln'EA=;#QOi)+TP$J/dBQ#!!"_T
!!!f8!!%4]Eb$h5BOPq'F"_$ACi=?80eR]fCm:)KDSe(=7B[@"!/q59VGWLNO2)&k
'8K\t4cqn%E-iR<<?];tbA[FT4<qD3e.Oj'8%CZZ?+^R@+SBIb=^$>DZgjD@hGWFQ
PAH%<n2+9'0LkuFi<6RFej)#\\QdRe#%&poR#pb`NZKLeGkuK+QS&%6*c4`=2_t,b
Y-c@<fW/2VTu6Tl0jcP6B6:g*^UFQ)0!B66BMg=9[3[`PUX1iEXk*nBGMX#1%$V>G
`PcEZ<'+C^`hAc5h@OK#ruo8h!!*'!!ru.j!sB;<"ono/!!"/B8c/6eoc=)5q47Qd
&HDe2GAhM406:]HFD5W*F"V]SCp\WFNa4Ycjnf&L%t^BC/RF(*gslV4j"e3cL/mh#
08$%D,:QK8_o\ZObCfWb=\NCmWiK2<jY>QS7]5r@S"#lU#$5%Hqi?7,Q^d:W59EZ3
=*M.2]sN8C04,];0CCHrDEiOCnpgYK?KIM,*mTPqbJX#/mI@fT?]GXMs8GgootUFp
o:(Nqq2Cq/]Kd.>%rZ><^3f\GI(k+%qXqbFa5bG'i=C/,a'4)_mnPfs1]D[rnG;9d
qWZK-X,FTZqnr6ph:;2Kq9*PdN4aOQk3fjJT2)k6SsjnHF*2K6HanEPhRC/.HiO*1
iqW.qcZbn.cZ?kX1@?bYh&L@ZO&(.O3aSQlGIJ))YO3L(>J'_2D%5FDk=0q"[pJ(W
S*T7pICA9^]^Fspe)`6,r1<?D)t$LG(WV:99[M&WEsJmd^HFRS9gcZXq[[rFdjmU?
L"i_Tr9MrtO8lougtsq2&''0,'Ci&Yf+25+Ndl=lki)C4%*;T7cWBR1LXT=UHQ%s7
M`9OC\@jsEhHcm<(mc%`[24n;Hhf$[q7keBh7WO\k5KV:^f4g#q#'^U"u*i:n)']I
k9Jo?qr@ABj-mNg4s&);k;OJXLDre]o9I@C/s#H3T<?L)*o=Rnhqd<_59J8LA=f7f
puVM8nb,g,rte_j1EKg!MI1`nS.6@uj6>t0i;ug@GIQbah=^C.0(8e[h77$,SM9S0
G<E%7Dh#J!\n5s&mGS9<qcE+QLV(aimeNd0eaK,tIDb*om;jZ>KC5CB:03e&+87b0
4b("+/p.*[e\<0kmH$Q]H8o9*`Q'q;&+nf;l2\g=:];_4`fFKpO6_$MJ&3o<-U$g9
-J%k?r=;u-e(s9cgIoW5J(hfChS2:Hn:3%1iXZU(X4,nfa)V*6j5CWNrBL)4f=r(G
C_W3Hc[Yl9h;.o&VoJKWXio=fDY+m"s%"(KEFV_'pf*L/igNXfnlmANUU6=f%MZ0c
Y/CoZ!q1^5c1)k-:c(SWGZl;@K;@39A8&YOYnRA0M'L<I<B9&J<Y/u/c^[WdnU#ZI
p.;%X((lKS70:JnO*0qBnG*A&>u6V4N[(MO&e\)Hr(Wq*@<!Q[_0Za43.?pUTKG`G
..\[,:-PE3]_<D&=W'.iR`$R83ZkgFlnf(/ZdN%@9kc1Kb@_ulgO(TK<"51bP^;A"
SW0L6J5j6XZ]i\T3kO[%YB+BC^M/Gln5Z+@<(86.O'G"l8mZ3`%7Lba*L;b"EPq?-
/T*HM_(o^E&Q)S#8Oi#3>(r#NF^adjWf'eA[d[+h)%eJ_c*Y@.]%NtE`+Gq<VTiVM
E[2'gZkh-OII!8#51\OMX5"@6o,dPNPWcNLH7$&76&'qmEPr>uSIS^9*AW"?jBtB>
Poba+/r:g0kBl6r2=WVr^*jULK5V)@4n0+i`^`3W$a\!&]teje(p"Q(+1IM?k-M9i
1/u"kBR.=tJ@%UhD*_J4*B.b=iUUT?%&%TS9i>)D[79+nemde*b-KTLEH&ihj'uIa
aS\bL:nJCJf/qQ\'mON>eACZoFunJqkIg<3ER?4RlB:=H_g4NV7tR^4YClS/8tld"
-Rs$mLoj9bijjfOdJ1q^.cOI-::/D%cheKQYC*E]Cj^(%)2]D%l%-Su(g#ZO.`$5`
"7W>5f3GV@CGD<+;V"/A6$](:-JoVUP#D*Za<kr`$RAgQS8::=jGsRr;m7WHH4WJI
EuB]Emp!&<nCEIQ6b+SU76)!B)L/FnkUiF!P(_S?[[OACG4i]B2m)TdpX*mkClM[4
CFXn=XCfF#8;N/9[BM-1:,cbReiK%iJct94g?oR<8jei.eR@k9kC>X*5,Z:Zcc:@a
13jDG?%ULn:Q"9R^)R'K,He'=3`U'K_3@9-*3i5cUGHLngh$[VTZC^n]E\fK.[T!,
X0OC[\:fpgP,?=:OsuWlfp.LpmX\93]ljV?7XKY;1N95VN)*]>3YO!PAXnU>gR:C)
;sodtPTHW7kfc$uX/7!P'Z>R;;;$Lp@(H:;Lf=/)ju?!96((A3`,eu>>cN1r3=kDJ
+=STdM(Y1ZW9aN+Q+q#eL&9;K9J5iF\t<3d5U)P>+G6k*(S%O*Y$D<eq`9;0WP";a
`[*@\;FW$'M0.&FdZiDh_RZKVJ@maZNU(fp85huJ,'4Gf,]RT,8F(X3,ZS_<\`=1N
f.KK>HkoUbKtgEH_0M=#*[X'l)%<#/3eu!<\]_6/5&NA=iI/mI\F0aFif)(B1q?\&
,EolV0qI&9YRPC-CT^(E,NFXim_<qq2K"'H)4ZVq)Frh'U"RMh6Qg.opB44f[igQ/
DP0O*W`gCt([[Z%^2!cfb0JL2kPW,HV($_t>N*6;F]`%!FLpe\:><ZC>]tEi4S>j)
a(#9<W\W<2Rj2ig`2)b9dtc$%FS`r9$Z:^Aq6c\hK_K?'c?U.daaM*Fb2Uf'[u@`m
I?k+.;%TYHoa7!hr%O$KB6HPG<Lsl%U;ao.PuY+f<\ugu7.m$.2KZO9J5jf:^%&s^
4HRECJ3_h]X3hjmI!5c=gp[c(Edrm(aXXF/!`Y<!,7iXch"ghTfE*-l)lr#4FuF?d
2J?CUd68*;`:\\*d;U`KOMr*(a+ha5G9_ad2?oXl54;pRnm6ZU\E<D>-c9TB__gD[
i$B(t@*'j9$3nU8=jU+TMtR`@&0IG[#*43-(`hLJJL"gO7B'H$;D3E>`!5Ye_;GaI
KY0k<IO$Qqn44gddHE4CP>.1#Fn1[8>_-Fhh6T/7T+i:&:LR%"UHD$tB/P!QK[2P(
5'%T"-'rCd543LE#`mbdB\p^@U#<]`9oBmH<#+mC5&MYqXOC8;F*nBGN$dDj)B.e6
^-X:?2m"8d$3t)Wjdp"-9Q)/G.g(@fTh+d08&p-^*rka^#4<iDdL4Z`I6/hlUiA&d
h[GZ4Vn9o2$blM8bZksbh30&GM1-;:N572RBl-sTHjka2if/C*'=d[0lqP,MYT4cn
pG7+apWdWeE[5qUDLhq%B3HX%%kS@3lgC)m7Cac]mQh(UPuYSlI(=n]WKYZ`P0*Ya
I\k+U-Z#D2SV:IAj6mXT#i$X<9JlZAJU#Ia!fV?k>mV8WidJ-U6<'t:[>rRV!4,nB
D`0/l>sKAjh]%2(K58ZgXL#Rkc;sB)%LtR^E_l2[k5ZcJT+I+#1N%f.^fOP:+m!lW
J:;W?*roH6%H8Ork7WI+Z8/>o=)NisR69pe"B_@F(;Q#VA10hrS1CA>aWp.<?i]`J
`8npB'2s0W$]qO4kY=q71C&Tr7Kc#dQ+k53oK(rZpad\S\5j*]7IEAG.9^VG"*'pY
%hoYcR=L6qgljMNSO7QfR=u'.O*)44o7<_IasfZ^hG[/jMK:lb,?.UP2]Tos)0hkO
`j6OL'uTugTr,[iJ>#9FnI]VGlWgGn>28]_]'W3XSEJ*>F<A#P%]&Y94Ue7@Zsdd7
Os@dnRW#uX<1XbfMug"KYO%][V4:bE+U[*5,H\r*@%+0Uc87oQ)q`X!\nZ,pN?_m%
XOf.9i0GFGX@W8Ras3KCHJn+%mZ;sN1nJ9<]m26eg4HtW*jTt+1.T85lXsWul(#a`
C;gc$H2KL:Y8nXm\CV&S)j%m]#Y9@'S1bdXZC@S2MS0R<Lce-E@FfKq@s#?;$6n7U
'k'lJ._S*3bdckIEIJp6C>?91]lDiYN8Ah$B8V.b\MtdqHSf6:KBE5(CsUn^!`F:X
/n1U9HTdJ0H$mQG=l+c:b!ktBOMia&L^/&TUG6l)8g9_aH/:eAc^D[d)Xa#OEP#a0
,"?f($kO_*(WA!JKo=q,h\W"PHMICDL5iqskQ,>7@&&@\ka9$+]Pe,3T>(nqGOC6G
fui5g+a['ibJ*NeZNs%G)+r+MnQ3[\PP\cu0p2?J@Y(Z'a/qbIrGSs:`-G@aeo2]V
&B?Sl@We*2bDFbrSm`%<E:7eJ=E7ZHC7P4o5ceFqnikKeeQC9aS'-r8:JaICIdWbc
c'ujGVg7AD=DVBm$6kE"Wn:h?\`%Oq`OuCofZJ9D,?>f115NgYmd#g!4"h8`dZe$L
?o-gnGj_)FNnDSSUN)^G/Yffq-BBBXn_qLlA!=[RP/'685e=7fX>D8h!uSYadsJM@
b[[>S]q%[n`L>l`4k=]rrt4R^'/!b5.Xg's8Lj7>PNB,&fM;81$q,pq"'L!e`5U"H
G66mPo+/VU.UT(dXHK,,+Ld97!"#>%hLc@XcO'b03)>bM-dU<HZFC-,^kB5c"Z!Wt
#^e-AWaUH,\OG/Z4dUDE.Dmsd"a#Ae;C'C]7MI&m]orN+_0m^5'8-02A5<c'*Jotq
0bMO_?3!kI+)B8El:"V64pN3gk<2DBNTYmc$BCacPlq`8T9H)A*F2RcS4-)jJ,.<"
QoTPqZP/p#/3-hX"sq=0=f5e$*1qpo)Y`MhZ&7p"`?h*m0?#;-WiDUP=%]]0ndH_$
FQXFF1i%>X)2Q-]JRk@'#@o9a^;1*9]l$%'HjV!Uk?pi5(?+<)V":OgFJrR'lY[sA
:'/PmG7-g\ahip6,4%)/LjVUG)a(hW_`+0,,9nTsJ23d(piGREKF6-Abr8A[4t`83
.=)4)B0n@2Iu$e5po,*u@;q9qbZMB)<+]&!'4pPV8WJJ@D-C(Vnm6s2.lM6"[d])p
g3Muk,+1r2[l^1f_.:gKQ:/%(E_eBNb]Q%0_Kder`_W0O)h_k%-a5Gq>6c@B4TXe0
igFV'>a+V5'[EbB1QgG.a][T82n>=Om[W&rE2Fc<\MDBIOd*D3(<BI$i$ED:*6@-r
U?#83q;afPE7sbqFH-JG'M/EDj6%4VFG<jd!91M$42hbqpQ8`A69u7Yo-Jt\c?h.:
.2!iYq%=g8mj1Onn^+.MU/N(qP4Mp+VBh%R"eqMf8SF-21k@4Ghau`fgi<RmfV^1=
_HB.HZ4si%7^3G%!Dhe&!Q$FF"E)Dhgep_37lYYpN;KdlfMgjO;#T>Jb,K+<G#P`(
TANE%/q![jfJ@f#+gj-A:#8V,X>>!sjQ9kR%*pq.4XqL/kR$@8%hR]478cpQHPUc>
$tZ%M^3BPrm+Rt6-?(>DD,7(Z#"m@BaEp)1;KfAqM0ic`1nJQIQEr\W%\tVdC4Z-M
^+I+0:Go7f\M$"GD1a9n'$n])Cn:8O)ea9gS@hY8;:u!0Gr.DuDg@pN[RR7UP-#6W
IL8Kr)m]uG/fPA\Gl^/;f*?RK_,CZ^Qtq.G4?EcUKHn5$*).:CL1e@'ktu_$N(U;J
JMX.1R(;rAHWt_7&;X4W#Dc:<-@=X\:<Xb`3n8./35\OW!>3W!JMbY5F7>0%NoV<@
o.^M"n<u$K7Q''(F0qKRM@@5:=5to!`4_g(b2R\ifU<W.jB:j/(35-Rk7N_*R_At=
3((g0jiQ[BKs'X$>onjK>Y9m'1hS&gY0Ycr7CtghH'WTuIW9fGH>f'//Qfm&[Gj?q
Y6*._5;ALd3HN7f=W[)9P-sHu-0$=RZZuIEY!-o5"_;XLE3;Je#lpdlk]3gT.'la6
P1c%gZ2EYhO=GY?R`dh:)TYb3[/%j-_7@ObB\3M^Mp#cmJU?['\"6)]F*EW@]Q8l%
='?!&7l^(la79s5WMu,;D2KATY4CBH]_tB+mnDb%pWq;;=\!`Aj[=$Y@X48^?;<L*
OI+#_E$Q3*M$&ZB3$0`a&dBAIZE$6(pFNJJMLfK=guCKBALl[=4;nSQE[FbE('b!%
\=WgndI'SoqZ_s9Sm*;U>0le:$C1b&Ba]/#cc"UpEf\[i-_[\+cb'>-3#=(t)BRol
%Mg?\r'!9`&XbbbVYF]37KSa`[KNlMGmdZPUC#CPW>8F@F+qdVfJR#=5a88r]9nX7
f$S^0hgt<h\L&sa'lFn+K]`=NfuFd@,]h43`-$O?UPM]NP62]Xhch?qc8pl>jVdpI
l8-cD.EP_A18q">8^%c<4MCe@F1WL2C&'4FJl1S-WfiS)^-Nm5BBY[kVQrt5OZ3^s
-!E`m5iB/40@`O0bENp2U.;6ucB/Id#!_Q]G/XO>K4ZLW:asX<3>b#Y,/)f5*X=5Z
1sY,S(W1;A9Ad]p.5IXVhUXHdJG>Xp'GS4_(;RW\5SEf,!Qfu?_R*1fYVS[r@^O?]
Gm7-6=Me<hBC\1%?</aBO/kV7E/V"?\%&lJTS_I(XsPW`L?d'E:jN-=<-_4WqugiD
7]H2fX];AZ!*MGD=ficN'!%;?4nTPNiTml=P'V4%<+cm=('1Cg8k=*=E:6DA6)c;;
_&IXk^Ntt[5!Rn*^2!daMpHtcb,VX/G0[aO$m*LqU7CGLi"X?2KO*&l,;(I@'AVl#
X?e:[<2>7Z\b?q3;WIi%Ja\S@+2R%o\rR7KXX2pg^5>M;.KH35`iJ#&g`KGg.4d(p
,)bVt<_8>7mal!7o8Q!Jch5p:$Fqg_-Khr5Y:s[9o`61no>I*WjL.`VU1E'/Ca.1S
!O?rl\Rq2=B*!h*heMkCT8KU.-6<Ps3CV4BYcnjS=3I`eb7SYQVl1a"4Mjr]+aLdp
X_&tk:jl?p64JYGdV=c0T3nNs/3eap`%,k);s0alg3*p6N]<rX>B>eeim\aVG#+(P
,?(("*]F1q`&3*FmL,uL/0;b78bC.HggM8pkCC>;fG'FdmGQ]n;cpiNb0gitVKj35
F!"I(]7uW'-s8TR`6(5G5Se"[Fem5sYh!Lnchsoo-gdLu=GM$V`bK+#4:YJ[EQZF-
Age9&$XM.ub6n!o!7>tr"b+6uB8+=b=`q]VX:cZRe-1r2aQQ5gh4eM)JNO*mI&ql5
Icd?k&$dVX36P)T"6nTIB_qo^Q&oTc81=5N^uKsi8E-NTS(XWS'L\pJ\Q'j"c"klZ
?4S0DYMa$+n8&a\Q*ZH^KAqfD8S`Qgpbm<+T<HqDm+]eP@s8o4_Y;u*+S3ZAo@ECE
UWr7BY8m(`F%a0i;In9IV3]k"#gK^CZ!e*5-/*`EWXlIE'!G*f6Eo5u#%V\EfKut#
g4^G@giJ?!+*c@)MoKb;)MjQcd@q*J,\N%h#tl]'a_P(e.*=J+RdAb\$IZJWU5;Ou
Q>%P7T4\3<Q*h_`.D5q[8/7(hmO;kl(N)=D'U7&X%4mt"]P?,'DLJnY)pc9:q[5?1
S`Vc>(UOo.<'C]/[Dr)E>j&P:.j8k\h+BGm"TZZeC;bAfm#2-iQUc!:&`0u8.R2\>
G0MP?X'c&[&lN9h4&_E`isQ;C)#nUiOK$HI1P>QE>'!;q_R>jkAO<NpTkL5;/C-ui
&pQSDOMnh>%3j,>o@e/<`t!Y/*[P\#e/t$J&Z29mLO`BD7&ppMk"]2`OM^tdD8skB
lJ%QCF#8GAAM#J!H*!YjkBIJE>J>-MC'1s+P1Ul*-TU0<5@qD<DDQF>2"#AO]?UEt
\%YYU;5rj3.(LDTJlklqlP<Z_pMFt+\q3#r'9=/W.ur57!>9VtN:+>1)NqY7Zb)U7
N-;tZM(2'Y-R^mi4XEqUQKoP69pnrK'VB,q3oHp%HAIiYPm>b4RI;1_Z2+8bn7rKt
r9GLk-MJbXkS5`OONBYS4U.b*:659CU4Ofep-uP5h$EcD!)^$(5sd?ira!1qHV)8@
j0>+,@X5)[^/#OpcUj_s9KefdA(>uL0]?dj\X[p%P$%.?!tr+N)9>_41aPlfm2DUE
%'k!:9hV_G>LZ;F^(o*i>21apeN1u-JLj5kD,.o[)oaZuXjUW;.aMg038XbB\@oQf
c=)'P;W_KF7&fe,>O'A2n,"mn*-%#9eiOQcO1Frbc,Y/o>iZZ&+277bbs"JP)=9\B
T6'BE.NW4FOaBk#^foZ+0WjA?XA>1.mRj+#.f8!0@Ic@J]1)up`,Hf"T?6]koY-8^
SJB4DG)U!tqYknO"&eQDT)5R=1nMt=QRkR,Xe\p4)o`&a?&%m;`sRP-RBo1%Mm&;K
:Lm;$)HP$r))`mg`5C9DUOC%*j_Gf;,g+fFiC&fiZ+m2,,p%m3F#h/,Jj(0ZNdnrX
GYqrJ,O@6]Nd0N+n-F%'F4DLCCSIkLm#k:pFEUA)/g3K)*OC=!KJP\4Ja8C0;rgsh
(=2'p$mQY9UD6%O,&]_khCXi2I@Xji4QI`UU@KU_Oed$k"@W&p_FQcL8WdftY?s/-
;Q9eW@L]Mt#t3aVUNe)GGSF#h/3N4sI$BBTCt)=!;oYJVjh)oOa7Bg2%Do/(N#E/7
91BZB\c8U"M%tuXc#a+lge0f!ZTP]3LiVL$^i\[b0TaFu)@)3W71Qm>49lEgj>J+l
--K]g+Gq6-;>D!fkh:68#*cd+rsTjW0*')O?g,;ebeI"47OYqGk8:ft&kAa<L-MP6
@NT(aa3P.p;6n'Y9TG`("!Tk=4CBc1BIo7H8Cb##T<nb7'huE4;?qWOT_LEq.+oqW
`QA)>@qjWiF.`!#UU(PMnP<p8h)k$'c2pM1j0>,b5L;\BIbNk-6uBN6S/n(O-2q1J
+G6l;l0[IlqXdY,':Sec*)mEF:Q8Rd1J$H\<ZmSr4D.39k;gb"*R@*@d3UD`]@8@W
%\2:l:nAnhVfD/$fDIX<PpkE%Dg:VY@W;*K1*miV[I)m:kBo)QO8a1<3H!FN;)2Qf
YW2'5JI57L7fcIB0kX+qj7P4?cFp>9A'7c3&3..h,pppVAeEA&qm5#%cY(K@P]'@D
)BH;:J11)UB@X`:17M,j4AY>:gu8REGTF-DI,OjIG11\YYM#K;FdLdpjnln7VCO]I
3$g3X8E)LpkO=adO_g&Ne@43=\*JSJ?:/:afQjXY*4l[a7A^ARmhU^W4UT9Ym]i&/
(B^D]8tOKH?Hi_rjOqB`8tPq%k6uuIic@`P-b&4nL0H2oPWTX&9!,>.S6&biEg']Y
F+p]/b7tJq$@iiY\""rtq>`1Kpq2s@FrAX?jkSfiU>e0Zb<"V;EnUD&.um0]=k5hP
)["1BFepbuQ=mQ,8R.G]Bfr^9aPo(S(Usj^oRI@a2_M$&3[n^UJLKFU!MWQPgBd!4
b<lj9qflWHXpIMlNm7.l>J(:uH$j%GDu%M%+N!^\?o0p9IfMn4[`\0(3DWo4!4b$.
ADQhq2aA9oG!M:1N3;(phh,!\Fi['0`*rEJ%bfO<f;<rn3RJ@K2+Ghd!G$3M_2;rH
#._Z#B76+SdF%mtLf.AqM=3Q2CMhrBIh#-\cJsIt*n/ldP+RS98ZO8RnkT2G#a?(U
QJ!_MEn7D2`9/MGatji80o]CFX+7qSeQB1nN2pX"i)dntGd$H4+JaT;BE)$BL?IOr
n[tmuW`n0qaAR2?IC+RO:G[aokSrKh)%bnF>Z_9S2[).7a?^KW=j?6?n=8EjQ,)Fr
5_LqeeYD6-#"[pkRPh<s\EjXQPdNY2n)PB>o%GlbVQq+qO$#>.7VLRd=X,D'?!.9"
6KstMAM"<n4:>]E?1=@/=S5o/VH(>Q\Y]`Aj-i1$diC[\kLVs[c]nPeG^f+M62<8c
ONs9Zg:fC-3m1!H,;$)R]-ZPhj*LY=HMGr2Dr07hc6*)^o_d=P]03p=q0GOqgq5^S
*FAYolhdiS2t'L+[B&%pr8$oAh<F]MjR&jhcetj*?\+!%_tE[`*A3q7a0+72\\*6u
+34,:Ip`4p3.:SQmaEgao]kQ.rBL;0f#@1QHp%B%e(pr!YNY/uiVr`/bN$'uYYW:d
Dr+aTT)X1\o6gMqe%<*8GMO<8?[`0,]"S$>T21O.oPJh:^H$d+hAl:br:t=/iH\C`
&$P-Ms*['O/oRr.NqpZel0ZIhkmrRHql@bE^AD<QH[1&4iT&V*`';TCfB(u`e)N[L
I;huLHc4]@m-u0QMuA8&p!Y#?Y.<_2^\XLN^?319$d[GA[qkO0>5WP<T!-8Mp@6?)
nT92%qpTaBJ,+.mIt)ZjIJ<P^q%)BP^U`uZ&0="VmZ3al_l)fVV!RO8L!-A%07J@k
r6#t1GBn=[q;UB4lLO*,(JN@X2<LfD?Q[#;I6.DYD`>+SI/heM>TV/qh#99CIs(@X
V#R;FT-6N;=-1S6?Z+`V>sD-GJ,@sil`5g4gZ/7kF?&0KT!?%W`,+)C[p/\-k4%=h
m]Ts`CQH6_+3"&U.;XBQnaUQZrs4be$.Jo-a7nujE4gS80(1F,a-+AJO8&UF[*KoK
fjD/"_Q0+mGZA4VY=<WQ2)h9bmJf@%fn\V`N#!N7o`#$o!!*'!!ru.j!sB;<"ono/
!!"/BPBPMK(]aU:5QUoc'EA+5GAhM406^u:;e:&mBl7R)/pM5LPgR<>"#1>ki4Io/
K\Y<uM_25V>7dcY&OChq1nAK9R7t\tDX5b5Y#Q&em4FN453?KiM`h:;#+7Wn7ZW:h
<Y-:RIG?[Uj`rkrer#BFCE"ZgUCY.d0u(AgF`dqi-R_E4Z4\I(NNU[`;Gq??].K];
+XMs8fMY1CUs'd12S\\.^_%ntr5o7O%VAsG;gi3I.13JbGAp2mLCd,9D__G-.Iu%;
rmnYZ[#X]<ATGR;GqaVkBRTee7T]U4oI^eU>D<dQ3)NICql&dU(k.%XH,01s0P*5)
QlHFM#DBckkj&%>Uhj*u,`/=-.b2F_/h<bt4Sj8(;SL9&0kBm$D*suan_m4Mo4RO`
%fcS0s8N0$:eLln'EA=;#QOi)+TPTu]8Ln7!!)9c!!!T2#Q\IS@o.2aE-![BDfTDA
G\q7>U'(KFTE"umzzzzzzzzzzzzzzzzzzzzzzzzzzzzzzzzzzzzzzzzzzzzzzzzz
zzzzzzzzzzzzzz!!!"hP$Ll#0GK91:&GMpmmf;jIOs4ZIUGi7N*nL!eb0!.X_le/
fY=oM@#3da]6!h_kK2uC`r0bGGoP+b99GmO'-IegQ&LViK&1*,ru-1&'#@*c"XL#L
KDOj.=\Mg`V1od<'kke,G`F%C6rei)euB!c6^NlJdr>lV`4=AXZ*)UbX9`*o"lO80
>iH_S@Did`!I`K2d1493Mc=J_eGr&nA<;GJ#)A`\+1rA2DGC\katIDQD5lHhFYC2k
Xl6Ce.#LdIX0$:>&:]X/e,$(.(KFKM:`;,.=`-#d@sf\1A_(5G5](St2QinqLm:#t
6q`U+>2PrPBs40\Uh7V@*d,cJ^ei:@F`5oONt.[A,K>c"UWtm(gG42'S@j.Ye*"PX
1oP,<oP-e3L0'ukmFI<+NHY[f])hM.1/X7q??u"qh9Ug(m0;Cn%rV=7C)1,G(I8`<
T@J6Xo*8[;>N"DW4ePC1piiT"!!!$!rrW6t9*5;2!!WE/!!!!B!(h&e!BC2]!'1>b
!"o83!-`@%A1qP5DKJid@VfU.G\q90PYZ5O0GqguPP-"Jhb0J)J>.dUdRK]_:".U+
B4Dojc$pqlOE)rI*Vq(Z?$=p\ij+V"`sHi;67(?s7'`!=[=@oIjNW$kGpbRR;/M\`
#n/m$!\0%q1V$'7Vq^i[#_B6_c7rC`-?)Zg]H"\8F]"/S-*72c]egs"&sum-N.Sj,
S-j'nWh@cD1Sk8`mStnAJb>@@ECQ0@Y[oW1R9^%06@IKooI1K>AW4uO7@&NtldlB1
E^s*WjK($s>'UIW<-hka7AqpnB>JAT^eF/N@IF1A(t$L)b][5Hc&"R*/J!tn')W=Q
[f]#'JA.`E&93=.bZ`@T#Qu$Y>tCg^N'!1q$+Nn7%u0-,@tJ_HZ#JYNk%po_%hr+q
6UMYo@@f^uTbPI`XR7.p<[/$QM'U-qcjEZH7(&On_>&>SRZ\Oe#7>'7^=-.cZg)4H
aKU@+/BnSLn-6ER8lJhB@01dNQq[6H<:/eNYYhuY"]Yp"S9i2c?U[(i5KE./e.*HX
EQ\JBi&r[.7jYB%i^eb!cAC3L;*!*BjbWWc[Z3b>596.QAMEK<npbcBr-:eIcKUA%
TmT9\,P['2=3c_1;]i_C>'PUb<rHTL`86CHlG*b!pqJD@mH.ihq7aQBZ/'g+p$H17
rtBe,$@M8fCS#'!I'N][0UWF!o^I>9UM!JJSISr79=a9qi#Q%_p1SrS]#+L4%hnEP
c'/,<Tu"p:5kAC'^B"<7s8N0$:eLln'EA=;#QOi)+TV=oL1u)F!!&7,!!!N0!!%4]
Eb$hEFEq\6F"V]SCqQ=`Enn/:a7$"M40[k3*,L$r[VN9TP&*Repd=A0f>eS[`+T^E
^ar#[dN7$7*;1[V3@(N85p""34@T=4S,q.CLCGHu`L7tI#8#_k#+?XOms_dmdc_((
3>;=8ZL`Hj&lB^.K^kPlaf"IrB.kT/?4`]i<,d.GH(auoL[T`m]C5/oji'SZo1/n,
r[Nhe-]=^$^=q;`is![ur`h!'<u^<hAu&6FjipgqjDDGT(5m!#$8uBC.iu-B\$lkq
2+A(LM#!R[oX0LuN:Oj<Db6BIU>Yj!/b=^?2hZ?%A?qFDVKo<S3_Lu07MoK@G4kqb
A$H`YQl"*!_:1V'-tU-!D>q]+2;eH>fEHfCSDk(b2.A(caQWRJb2QKh2dAm/9,1#=
;P\UR)=Z^6jip33YN_RABp%_Bnk.ITlVHZXF2<bs\pHm:R'CGW$\c`jU0aAZS5%KK
9(LseB;BV/6N>HD--cnalVj+Rad-g!s$^f&6IOo9mXFcPRI3B,]9MfSju]"rHSbUn
+\BOL]0g<@J+dTV^R?VLnV"trdh?T5<?GT@^NJ&LeYd/c7mj'R:5.T4;M!OokANe:
99X(`2B5N$F]7SK:R>.G$)o-IGk1E:rT08Um"-MijjoH>_%QTi62@FK-L:,M4?(Yk
Ih@U%X2"ChG)Y2(4F(uie"r(Q[?VCgM!qa&3Vno@)`QnD2mAj!kdp*sPir5]m6!k*
m\:?*g*4"d[[UD`3d.hGWhI,(C2!XH)EN,CL(9iUTqeN#kf$IXA2+&0L)<_MI3h;6
%%qLt37NcH35gR634+A$32D/g30\sU3!(,FEPsT#is8QdV\$*`$E[^nF$t@>GOlg5
a5&j(pi/7=!.N_J$/^fU3PYH22lC^]mcNm'a5*8en_@lY'jW;WnRAlJk!Bbe'Jq<'
rHK7>MIif^0K_M_;&SF;"(8.Q<_pZ/Be_?72b/Z9WW.?PkkZeBo4ZEe8u[^4YoTb?
$VaW()j)CC]RW7=Mc)T*`$_E.SPr+*9LB#-3,$GoNHgl9!lX5ag]V+aScg+KL);0b
X9+iT`BoK9"UOCP`);Q_RNTH;_crFf+"IeW:<PJjJQVBYKU?2-Y71nPHtctBj!t4a
).+4_4ps592(d0Ge[.RD<mq,0>8<d(`iZ*A)Rl.NB\[@Vpi3oX7;>`5^$=5fIdZVT
(&C&dk^H4Y%4>lk0RgU4c^@7(7$8K\QA\;+7de:Ma,Flu<$W"%Fbi%p71-H*2^*4=
NgfKYr.)4hTu=@u"d7Jp(J%pahKXmj;p/^b5e@;#cV2Mbd4&6d)C4#c8]tj74'ld"
(a!1%!Lts6#EqG42F%D[f?7=ac4HC^h95=/>I2>ml>]i3g:\CBTU2X6Do8C0Mh`UD
W[tb&9fa)).dgs_N]8VdW++#;r2t%]+N_C?Q4&j3;_,6e_l*@n$@)3'/4Uf/<D")=
j0ptn1;_Hfg^<'#qVBoi=tFfaW<XaYn5L*UaFZ/41P(&N9P8h`e%l\t"S7C67sbm4
oT4WpYlKt]71r07P$2HQc@X96LA,?W0G?i$@;&`*<]?Q`1_=Y!Z=UH-#bWc7([k?&
$*Y=']Ut!jqRfWQ;-aEX=f2`#EqWQQO&'oe724h,d"en\k9%rHf3!gGNF+$>E9!8j
`g^^hd.&(5?sC/2#M[+L3nUd'j>h9f6M9Jp3o#H+qKU$sIl1#t6I*b2g]07J?mF;(
K+4MFbDbU-O4`q'*jFUW52Lf5@sA#LaVis-,YN_L_n\Ta_SALK_8&D5^qbO_@/M$+
(2Wnc3YlQ0]fHlZck=-GKo340dsn$k4;KJIS/GG-3&@d8EFrUPib\(+7-AX!#S&f4
=NF;nB-G/e1q]L7;FhuR![6HsoS*K.6!D[=UmUJG&Ho:TiXULgkGZj[MsUifb/p:?
/6LL\.qHBrS.R&].R]qNC[2;I=LR[(gLOn;]boRZX-CPE+ju$9a"b,A<P:M#P.3\M
%kdSc3pla/h(4Fs\lbNj[kWZm)_IP2]k+X__6,LWh!HhC7h\p89h40['Sh%QND2gM
N13=EHApH+M3d8>5YKbliF^:+._0,91sclDq-p"nd:pe0:CjXc]^6,\UV?M+eTd,4
46h`uQ#UHCI=\c2ljCS(^*m_f,s$lmIC0'$B:*;dp;=i/[`>>f9u4om9c:#_2kj)U
+6aT=B6Hts2!qF5ScF&n/><A\c6#\VS[WNCE#S^Pf;2Y1nXN(>SA!ktY$+uJ4cY0D
N>jT3n$is^'9F.f-keVc;(9U])4[2OLqu[*NBh,,3$[@e'su"m.qnC8XWYS1>E)_g
\.O@[")\6FW"=LqlA1^W)hAVO0_Z20UnEDK&SRk)"BqaC!JV7;[)WIfgA;-j;LF-)
.;5DA"Bq`8JJK_'TS3^bBVBaTm@EBG6A6,\:a#ll</<dIeZ9QW#Sl(RKF7*pKF0.l
6A6,\:a#ll</<dI'dD!kKa>%^+T`rh@.#=?83mUu,1&Z1#ddF/7h,EN$LMh"L%[\s
KbPW&64-np&:kTH7%f5@&SRk)"Bq`8JJ'FdpC\sOTS3^bBV@`q>,^Rmi<Z,DH^mp+
]oPu5`CHkgJefh(TS3^bBV@`q>,W!`(+M_FKF5r:KF0/ATgAlcW"@>mTCjL&f5:4C
pp6R;48+G:\uIjbd=.>77dUXT28+%:L-LT8.`?2Rq;C5'WAfPtfIUUNS>(13<k#X%
Q3buocOX[e:\`T7O[$EV57:o&R0*0_:ePb&A\TnZD+d^dmIs&\D$a76qgI/L[KP(;
IUCM\\nl7V;:?+2mRo@%nW(N"03_ZCE/=C3Zt0M5\1]XBL2_\?o!)bN&F&9Rf_T"6
3$#0i0*R$CE3om@DF.]46=2V7(^acOe(fVMhK'?b]$X5;q9t2:44]BXHe=>KF#B1"
f%'adFVD!^L'0/2",t!q+j/Qi&EW(iQl**2L'4TYrKFRWi8n^(nTQiYH+Ouhr*0]/
19@N"!UFJk^q+jQK^?YP],IEV>n'Y[Y(hirXK*KFlY8u+\f)3o>R`CdY(e?C=$r4E
X$N#0Fu:OQ>n%*B=$qS+Wr^5teI^j0C5D.r[5j/nE])"WQ8rgpAf9STABPONS1R*h
C<<dTXHkDhB=.kjebC+c/_Nm?'8ChZ9c3.b2Z`#9-O0$A2[\q\2p0Is\8&"dec%mX
'<nXZ<D-(gj/Sq^=6$<W?<?0e-+BppeP_a7ERdsRX8S6gS)ECC>d`)IC0\0rlY9\4
jE<D`>3^,cY$1+226L-JEqRK[fno6C26L-JFZ$=*Ek<5k/TnTB="SR*)HSM5\JeO$
3F.WFQ?lhrX-S';NN8B#Y/XI7?*;1I93n^?<D-W#``5Z,=6$<W?<?0eV-[4bWhli0
edIj%gUrVAm9Db)WW!?El[bJ"q@1mL,,!WZ10M:=8K6ue7.iX;lE<p;lO/GIMoH;d
'e`NjEW,2pNi()peQ83dV3GLCQ;[[\%3@Iqpp!fIQ1Z7VHe3n]^)1&@f=LJ)g[d`B
H;C`P;[Dh2V93_Z%_f"HEDmBJIqEEfOtlXM,u565Y'sq^e^NTN<%,0QN2Gi$;XH'%
mTiaP0<2-9gZGd:8)%\,0>KU8V+DCs^fJ''e]7M\@ZKu]IM9H0L@#iL.H@B?"R-bB
F%aL)Z$,lE-(29ee_h9e4mo$CfgsIOo49dq3Rds`hemB$*?C`CeQK<O4`\T,$^uO<
"cJ4TAc9KSDdS"kp@TNbIf7m-YCHH<hgbOslbE+fn^2!UUbhJ&HXn&X.UlOMoB8?N
Ma!#Wn>b;HkEL+UoY5^Rm'k(og!5&9>k?6#lSW_Z"`q*KS+jp>;HM1H)MQ.^a!F;f
>c)&0HEir&Zt>q$m1bu%rq"H^^FG%rEpEt$9\90mMDa/!rcq:dUYV:fQ4E1^g?;/p
"b$%Pg`"UQ<dssu5(!4]g-6<-U!i#n9&%?Vs.jf9$ZNkZl-9.2,V`T<'MnP6mFb\?
T%9sdi+_(Z%Sq/C@QU8"@f\gi!if5.ElF-a[Yf3OA9Z%9rF6%a65ddWo:lQY3"6U,
Ub%1;A?B]sibE>t&QNUVYF'WPNf9pVHpBeOJ*#Sf%fcV0rrW6t9*5;2!!WE/!!!!B
!!]42OQ?KC!9""[!"],9!G$+Y:i^JnF"^s@E%ZBPC`oGT!@XT@!<<*"zzzzzzzzz
zzzzzzzzzzzzzzzzzzzzzzzzzzzzzzzzzzzzzzzzzzzzzzzzzzzzzz!1[!(DVHiR
]ara[(qMY`Z`H\"7E(?tk[@Zt`,3hh9II\f8W]=4fg"jSp1'la`cJSZk0r?89g(X;
iqB4V`=ZQ7hQ9m?RBcmap9enP'mm#G?7f9A:q9b4mpO+0OP$[_qaPCr%hR,R.]A%o
/%.qV9?raX6`\XgdZ-)BO0(_Uj,X#60cKJm5.'70c_f0,%PJ*jLAEA.%9_S.H,T`"
>'lh5V5NSmW1Ob=[)"3pq'H&T-aguqn:;=>7qF4"Jh2a"!jPTa8Fi>04V5q'ek+.&
;o*f/epA-s7WM=kn)lLC7tgXKJi-^TR4CK@*I[Jf((Ztq+u^'\>U&AI>L8.=n0I1K
O$iHZ3)WT$#sBJL;=1(bqcA>9,dplZ=H`ck;)X!`^Bnlj.M$`u9GVlkjUj?G==!L/
`]I\L=-Xo_[UM`ANH3,:Z9IKV%1/f2If@-8on!]J#KMO.D!'F**aBJ(6)T>(V7t*F
L%Na=mI23<bH]ht6SEU.B<:HI`ZJL<^(&5I`I'p]n[J--.Y!f:j42+AE]!T)KDTL^
3mVG9hMcYdPS.20Tr+Ln@i5Pl:KN?1+$fk;*Rs8@^CtmnT)'6RbNm97^2AqU*::W4
PiOIt!!*'!!ru.j!<OhQ'EA=;#QOi)+TPr3?WsT5!!$.-!!!Z4zzzz>=3=HFCf?3
?W;;iATM-0G\q7n9*#)G!#,D;!!iQ)!$M=`OW(^t!!!!o!WW3.zzz!9XFa!+0bXCi_6^
Eb0'.:eLfj/H?Ib"ono/!!"/BFL,nt*WZ6@^B=N:)uos=zz!!!6/!!%4]Eb$h1Eb0'.
04]!2F_t]-F=qfTCbBa>Ci`EG!<OhQ'EA=;#QOi)+TS.+[\aBM!!&'H!WWf4zzzB*eP<
GAhM404]!2F_t]-F=qfTCf!b*!\FBZz!!!!B!/t*k(4q#;!.o\%!#5J6zz!!!"l,6.^f
DfTAAD.R6l@4u>3@:s.+/oY]@:eLfj/H?Ib"ono/!!"/B3H!$SU&Y/nh>dNU(B=F8
zz!!$#o!W[F_Eb$h5BOPq'F"_$ACi=?81+mfgCf!b*!\FBd!!WE/!!!!B!.)(*";h=C
!08#u!#5J6zz!!!!MU]LO?DfTAAFD,6&AM8.=ASl!5/pM5L:eLfj/H?Ib"ono/!!"/B
bDKd##QXo*3W]9]+TMKBzz!!%5C!W[F_Eb$h5BOPq'F"^m@AScE@@q]:kF>5CmD/:hF
AScEa9*#)G!#,D;!!iQ)!$M=f?jqht!<<*]!WW3Dzzz!5>K8!-`@%A1qG+@<-I204/a2
Ci_7>BOPq'1+mfgCbBa>Ci`EG!<OhQ'EA=;#QOi)+TU%E(bmcK!!'k^!!!c7zzz#-@q,
GAhM404S[(Ecc@UF*)\DAMPl_D/<$A!<OhQ$31&+z+TOZ?i\[2S!!&Q<!!"tYzzz
Cp=$AGAhM404f!0ARo=cDJ+#D88i6O?Y!_T@pa%^F_ku'A7]+BBk)1%F)PZ4?U]3L
ASa(RG\hGG:eLfj/H?+Xz!!"/BZrM%2<%7kJ<%7kJ2ZNgXzz!!$B[!W[F_Eb$h7D.7'e
A8,poF"^(&C11I[ARAqSCh%U(DdR$d?VP6EEc6#;AoqBKG[k<$/pM2RGYh$6!\FBd
!!WE/!!!!B!&R.4Uco"`!8/Fo!#>P7zz!!!!)"TnaKDfTAA@q]:kFE9*FBOPq'0eR]f
Cf!b*!\FBd!!WE/!!!!B!7`Y<0erk3!5^#^!#>P7zz!!!"F$j-KRDfTAA@q]:kFE9*V
FEq\60eR]fCf!b*!\FBd!!WE/!!!!B!#pVs#;cYc!2gn=!#>P7zz!!!#W&-DoVDfTAA
@q]:kFE9*FBOPq'1+mfgCf!b*!\FBd!!WE/!!!!B!(XgW#0d,J!&4NT!#GV8zz!!!!i
(]sb^DfTAA@q]:kFE9*FDes?4F"o:lD/<$A!<OhQ'EA=;#QOi)+TP+2pK[A4!!)hd
!!!T2zzz8f7^2GAhM406:]HFD5W*F"V]SCf!b*!\FBd!!WE/!!!!B!0_TW8JhI.!'gSc
!#,D5zz!!!":3!0/)DfTAAG@b5^ATW$.DJ+#CG\q7n9*#)G!#,D;!!iQ)!$M>DgUiAg
!<<,b!WW34zzz!4Y#k!+^"X:i^JnF"_$AEb-kJD/<$A!<OhQ'EA=;#QOi)+TP)O2ZYo?
!!#%b!!!W3zzzB067rGAhM404o-?FAu[XCh55DD/<$A!<OhQ'EA=;#QOi)+TV=oL1u)F
!!&7,!!!N0zzzcoqO3GAhM406;5\Ch7Z?G\q7n9*#)G!#,D;!!iQ)!$M=HUV)]M!<<,Y
!rr<4zzz!..?@!+^"X:i^JnF"^s@E%ZBPCf!b."onW'!#>PM!!`].!1$@^!!!!~>
